# Supplementary material for: A general pattern of the species abundance distribution
Source: PeerJ. 2018 Nov 13;6:e5928. doi: 10.7717/peerj.5928 (PMC6238767; doi:10.7717/peerj.5928)
Supplement: Supplemental Information 1 — A dataset (named “nabc”) used to obtain the frequency of SADs. The detail information can be found in appendixes of Baldridge et al. (2016a) and Baldridge et al. (2016b). [file peerj-06-5928-s001.xlsx]

## Sheet: nabc_obs
Sample ID	Station ID	BioDataTaxonName	Abundance
AL_Steve_enson	AL_Steve_enson	AL_Steve_enson	82
AL_Steve_enson	AL_Steve_enson	AL_Steve_enson	46
AL_Steve_enson	AL_Steve_enson	AL_Steve_enson	36
AL_Steve_enson	AL_Steve_enson	AL_Steve_enson	33
AL_Steve_enson	AL_Steve_enson	AL_Steve_enson	32
AL_Steve_enson	AL_Steve_enson	AL_Steve_enson	30
AL_Steve_enson	AL_Steve_enson	AL_Steve_enson	22
AL_Steve_enson	AL_Steve_enson	AL_Steve_enson	19
AL_Steve_enson	AL_Steve_enson	AL_Steve_enson	17
AL_Steve_enson	AL_Steve_enson	AL_Steve_enson	16
AL_Steve_enson	AL_Steve_enson	AL_Steve_enson	16
AL_Steve_enson	AL_Steve_enson	AL_Steve_enson	9
AL_Steve_enson	AL_Steve_enson	AL_Steve_enson	8
AL_Steve_enson	AL_Steve_enson	AL_Steve_enson	7
AL_Steve_enson	AL_Steve_enson	AL_Steve_enson	7
AL_Steve_enson	AL_Steve_enson	AL_Steve_enson	6
AL_Steve_enson	AL_Steve_enson	AL_Steve_enson	6
AL_Steve_enson	AL_Steve_enson	AL_Steve_enson	5
AL_Steve_enson	AL_Steve_enson	AL_Steve_enson	5
AL_Steve_enson	AL_Steve_enson	AL_Steve_enson	4
AL_Steve_enson	AL_Steve_enson	AL_Steve_enson	4
AL_Steve_enson	AL_Steve_enson	AL_Steve_enson	4
AL_Steve_enson	AL_Steve_enson	AL_Steve_enson	3
AL_Steve_enson	AL_Steve_enson	AL_Steve_enson	2
AL_Steve_enson	AL_Steve_enson	AL_Steve_enson	2
AL_Steve_enson	AL_Steve_enson	AL_Steve_enson	2
AL_Steve_enson	AL_Steve_enson	AL_Steve_enson	2
AL_Steve_enson	AL_Steve_enson	AL_Steve_enson	2
AL_Steve_enson	AL_Steve_enson	AL_Steve_enson	2
AL_Steve_enson	AL_Steve_enson	AL_Steve_enson	1
AL_Steve_enson	AL_Steve_enson	AL_Steve_enson	1
AL_Steve_enson	AL_Steve_enson	AL_Steve_enson	1
AL_Steve_enson	AL_Steve_enson	AL_Steve_enson	1
AL_Steve_enson	AL_Steve_enson	AL_Steve_enson	1
AL_Steve_enson	AL_Steve_enson	AL_Steve_enson	1
AL_Steve_enson	AL_Steve_enson	AL_Steve_enson	1
AR_Crook_Creek	AR_Crook_Creek	AR_Crook_Creek	42
AR_Crook_Creek	AR_Crook_Creek	AR_Crook_Creek	26
AR_Crook_Creek	AR_Crook_Creek	AR_Crook_Creek	19
AR_Crook_Creek	AR_Crook_Creek	AR_Crook_Creek	11
AR_Crook_Creek	AR_Crook_Creek	AR_Crook_Creek	8
AR_Crook_Creek	AR_Crook_Creek	AR_Crook_Creek	8
AR_Crook_Creek	AR_Crook_Creek	AR_Crook_Creek	7
AR_Crook_Creek	AR_Crook_Creek	AR_Crook_Creek	6
AR_Crook_Creek	AR_Crook_Creek	AR_Crook_Creek	5
AR_Crook_Creek	AR_Crook_Creek	AR_Crook_Creek	4
AR_Crook_Creek	AR_Crook_Creek	AR_Crook_Creek	4
AR_Crook_Creek	AR_Crook_Creek	AR_Crook_Creek	4
AR_Crook_Creek	AR_Crook_Creek	AR_Crook_Creek	4
AR_Crook_Creek	AR_Crook_Creek	AR_Crook_Creek	4
AR_Crook_Creek	AR_Crook_Creek	AR_Crook_Creek	3
AR_Crook_Creek	AR_Crook_Creek	AR_Crook_Creek	3
AR_Crook_Creek	AR_Crook_Creek	AR_Crook_Creek	3
AR_Crook_Creek	AR_Crook_Creek	AR_Crook_Creek	2
AR_Crook_Creek	AR_Crook_Creek	AR_Crook_Creek	2
AR_Crook_Creek	AR_Crook_Creek	AR_Crook_Creek	2
AR_Crook_Creek	AR_Crook_Creek	AR_Crook_Creek	1
AR_Crook_Creek	AR_Crook_Creek	AR_Crook_Creek	1
AR_Crook_Creek	AR_Crook_Creek	AR_Crook_Creek	1
AR_Crook_Creek	AR_Crook_Creek	AR_Crook_Creek	1
AR_Crook_Creek	AR_Crook_Creek	AR_Crook_Creek	1
AR_Crook_Creek	AR_Crook_Creek	AR_Crook_Creek	1
AR_Crook_Creek	AR_Crook_Creek	AR_Crook_Creek	1
AR_Crook_Creek	AR_Crook_Creek	AR_Crook_Creek	1
AR_Crook_Creek	AR_Crook_Creek	AR_Crook_Creek	1
AR_Crook_Creek	AR_Crook_Creek	AR_Crook_Creek	1
AR_Crook_Creek	AR_Crook_Creek	AR_Crook_Creek	1
AR_Faulk_nties	AR_Faulk_nties	AR_Faulk_nties	70
AR_Faulk_nties	AR_Faulk_nties	AR_Faulk_nties	40
AR_Faulk_nties	AR_Faulk_nties	AR_Faulk_nties	39
AR_Faulk_nties	AR_Faulk_nties	AR_Faulk_nties	30
AR_Faulk_nties	AR_Faulk_nties	AR_Faulk_nties	30
AR_Faulk_nties	AR_Faulk_nties	AR_Faulk_nties	29
AR_Faulk_nties	AR_Faulk_nties	AR_Faulk_nties	26
AR_Faulk_nties	AR_Faulk_nties	AR_Faulk_nties	24
AR_Faulk_nties	AR_Faulk_nties	AR_Faulk_nties	15
AR_Faulk_nties	AR_Faulk_nties	AR_Faulk_nties	13
AR_Faulk_nties	AR_Faulk_nties	AR_Faulk_nties	12
AR_Faulk_nties	AR_Faulk_nties	AR_Faulk_nties	10
AR_Faulk_nties	AR_Faulk_nties	AR_Faulk_nties	10
AR_Faulk_nties	AR_Faulk_nties	AR_Faulk_nties	9
AR_Faulk_nties	AR_Faulk_nties	AR_Faulk_nties	7
AR_Faulk_nties	AR_Faulk_nties	AR_Faulk_nties	7
AR_Faulk_nties	AR_Faulk_nties	AR_Faulk_nties	7
AR_Faulk_nties	AR_Faulk_nties	AR_Faulk_nties	7
AR_Faulk_nties	AR_Faulk_nties	AR_Faulk_nties	6
AR_Faulk_nties	AR_Faulk_nties	AR_Faulk_nties	5
AR_Faulk_nties	AR_Faulk_nties	AR_Faulk_nties	5
AR_Faulk_nties	AR_Faulk_nties	AR_Faulk_nties	4
AR_Faulk_nties	AR_Faulk_nties	AR_Faulk_nties	4
AR_Faulk_nties	AR_Faulk_nties	AR_Faulk_nties	4
AR_Faulk_nties	AR_Faulk_nties	AR_Faulk_nties	4
AR_Faulk_nties	AR_Faulk_nties	AR_Faulk_nties	3
AR_Faulk_nties	AR_Faulk_nties	AR_Faulk_nties	2
AR_Faulk_nties	AR_Faulk_nties	AR_Faulk_nties	2
AR_Faulk_nties	AR_Faulk_nties	AR_Faulk_nties	2
AR_Faulk_nties	AR_Faulk_nties	AR_Faulk_nties	2
AR_Faulk_nties	AR_Faulk_nties	AR_Faulk_nties	2
AR_Faulk_nties	AR_Faulk_nties	AR_Faulk_nties	2
AR_Faulk_nties	AR_Faulk_nties	AR_Faulk_nties	2
AR_Faulk_nties	AR_Faulk_nties	AR_Faulk_nties	1
AR_Faulk_nties	AR_Faulk_nties	AR_Faulk_nties	1
AR_Faulk_nties	AR_Faulk_nties	AR_Faulk_nties	1
AR_Faulk_nties	AR_Faulk_nties	AR_Faulk_nties	1
AR_Faulk_nties	AR_Faulk_nties	AR_Faulk_nties	1
AR_Faulk_nties	AR_Faulk_nties	AR_Faulk_nties	1
AR_Faulk_nties	AR_Faulk_nties	AR_Faulk_nties	1
AR_Faulk_nties	AR_Faulk_nties	AR_Faulk_nties	1
AR_Faulk_nties	AR_Faulk_nties	AR_Faulk_nties	1
AR_Faulk_nties	AR_Faulk_nties	AR_Faulk_nties	1
AR_Faulk_nties	AR_Faulk_nties	AR_Faulk_nties	1
AR_Faulk_nties	AR_Faulk_nties	AR_Faulk_nties	1
AR_Faulk_nties	AR_Faulk_nties	AR_Faulk_nties	1
AR_Faulk_nties	AR_Faulk_nties	AR_Faulk_nties	1
AR_Rich _ntain	AR_Rich _ntain	AR_Rich _ntain	91
AR_Rich _ntain	AR_Rich _ntain	AR_Rich _ntain	56
AR_Rich _ntain	AR_Rich _ntain	AR_Rich _ntain	47
AR_Rich _ntain	AR_Rich _ntain	AR_Rich _ntain	42
AR_Rich _ntain	AR_Rich _ntain	AR_Rich _ntain	36
AR_Rich _ntain	AR_Rich _ntain	AR_Rich _ntain	31
AR_Rich _ntain	AR_Rich _ntain	AR_Rich _ntain	25
AR_Rich _ntain	AR_Rich _ntain	AR_Rich _ntain	21
AR_Rich _ntain	AR_Rich _ntain	AR_Rich _ntain	17
AR_Rich _ntain	AR_Rich _ntain	AR_Rich _ntain	16
AR_Rich _ntain	AR_Rich _ntain	AR_Rich _ntain	14
AR_Rich _ntain	AR_Rich _ntain	AR_Rich _ntain	12
AR_Rich _ntain	AR_Rich _ntain	AR_Rich _ntain	12
AR_Rich _ntain	AR_Rich _ntain	AR_Rich _ntain	12
AR_Rich _ntain	AR_Rich _ntain	AR_Rich _ntain	10
AR_Rich _ntain	AR_Rich _ntain	AR_Rich _ntain	9
AR_Rich _ntain	AR_Rich _ntain	AR_Rich _ntain	8
AR_Rich _ntain	AR_Rich _ntain	AR_Rich _ntain	6
AR_Rich _ntain	AR_Rich _ntain	AR_Rich _ntain	5
AR_Rich _ntain	AR_Rich _ntain	AR_Rich _ntain	4
AR_Rich _ntain	AR_Rich _ntain	AR_Rich _ntain	4
AR_Rich _ntain	AR_Rich _ntain	AR_Rich _ntain	3
AR_Rich _ntain	AR_Rich _ntain	AR_Rich _ntain	3
AR_Rich _ntain	AR_Rich _ntain	AR_Rich _ntain	3
AR_Rich _ntain	AR_Rich _ntain	AR_Rich _ntain	2
AR_Rich _ntain	AR_Rich _ntain	AR_Rich _ntain	2
AR_Rich _ntain	AR_Rich _ntain	AR_Rich _ntain	2
AR_Rich _ntain	AR_Rich _ntain	AR_Rich _ntain	2
AR_Rich _ntain	AR_Rich _ntain	AR_Rich _ntain	2
AR_Rich _ntain	AR_Rich _ntain	AR_Rich _ntain	1
AR_Rich _ntain	AR_Rich _ntain	AR_Rich _ntain	1
AR_Rich _ntain	AR_Rich _ntain	AR_Rich _ntain	1
AR_Rick _e WMA	AR_Rick _e WMA	AR_Rick _e WMA	387
AR_Rick _e WMA	AR_Rick _e WMA	AR_Rick _e WMA	241
AR_Rick _e WMA	AR_Rick _e WMA	AR_Rick _e WMA	172
AR_Rick _e WMA	AR_Rick _e WMA	AR_Rick _e WMA	90
AR_Rick _e WMA	AR_Rick _e WMA	AR_Rick _e WMA	88
AR_Rick _e WMA	AR_Rick _e WMA	AR_Rick _e WMA	80
AR_Rick _e WMA	AR_Rick _e WMA	AR_Rick _e WMA	64
AR_Rick _e WMA	AR_Rick _e WMA	AR_Rick _e WMA	63
AR_Rick _e WMA	AR_Rick _e WMA	AR_Rick _e WMA	59
AR_Rick _e WMA	AR_Rick _e WMA	AR_Rick _e WMA	29
AR_Rick _e WMA	AR_Rick _e WMA	AR_Rick _e WMA	28
AR_Rick _e WMA	AR_Rick _e WMA	AR_Rick _e WMA	18
AR_Rick _e WMA	AR_Rick _e WMA	AR_Rick _e WMA	18
AR_Rick _e WMA	AR_Rick _e WMA	AR_Rick _e WMA	14
AR_Rick _e WMA	AR_Rick _e WMA	AR_Rick _e WMA	13
AR_Rick _e WMA	AR_Rick _e WMA	AR_Rick _e WMA	13
AR_Rick _e WMA	AR_Rick _e WMA	AR_Rick _e WMA	11
AR_Rick _e WMA	AR_Rick _e WMA	AR_Rick _e WMA	11
AR_Rick _e WMA	AR_Rick _e WMA	AR_Rick _e WMA	10
AR_Rick _e WMA	AR_Rick _e WMA	AR_Rick _e WMA	10
AR_Rick _e WMA	AR_Rick _e WMA	AR_Rick _e WMA	8
AR_Rick _e WMA	AR_Rick _e WMA	AR_Rick _e WMA	6
AR_Rick _e WMA	AR_Rick _e WMA	AR_Rick _e WMA	6
AR_Rick _e WMA	AR_Rick _e WMA	AR_Rick _e WMA	6
AR_Rick _e WMA	AR_Rick _e WMA	AR_Rick _e WMA	5
AR_Rick _e WMA	AR_Rick _e WMA	AR_Rick _e WMA	5
AR_Rick _e WMA	AR_Rick _e WMA	AR_Rick _e WMA	4
AR_Rick _e WMA	AR_Rick _e WMA	AR_Rick _e WMA	4
AR_Rick _e WMA	AR_Rick _e WMA	AR_Rick _e WMA	4
AR_Rick _e WMA	AR_Rick _e WMA	AR_Rick _e WMA	3
AR_Rick _e WMA	AR_Rick _e WMA	AR_Rick _e WMA	3
AR_Rick _e WMA	AR_Rick _e WMA	AR_Rick _e WMA	2
AR_Rick _e WMA	AR_Rick _e WMA	AR_Rick _e WMA	2
AR_Rick _e WMA	AR_Rick _e WMA	AR_Rick _e WMA	1
AR_Rick _e WMA	AR_Rick _e WMA	AR_Rick _e WMA	1
AR_Rick _e WMA	AR_Rick _e WMA	AR_Rick _e WMA	1
AR_Rick _e WMA	AR_Rick _e WMA	AR_Rick _e WMA	1
AR_Rick _e WMA	AR_Rick _e WMA	AR_Rick _e WMA	1
AR_Rick _e WMA	AR_Rick _e WMA	AR_Rick _e WMA	1
AR_Rick _e WMA	AR_Rick _e WMA	AR_Rick _e WMA	1
AR_Rick _e WMA	AR_Rick _e WMA	AR_Rick _e WMA	1
AZ_Boyce_retum	AZ_Boyce_retum	AZ_Boyce_retum	30
AZ_Boyce_retum	AZ_Boyce_retum	AZ_Boyce_retum	23
AZ_Boyce_retum	AZ_Boyce_retum	AZ_Boyce_retum	14
AZ_Boyce_retum	AZ_Boyce_retum	AZ_Boyce_retum	8
AZ_Boyce_retum	AZ_Boyce_retum	AZ_Boyce_retum	7
AZ_Boyce_retum	AZ_Boyce_retum	AZ_Boyce_retum	6
AZ_Boyce_retum	AZ_Boyce_retum	AZ_Boyce_retum	5
AZ_Boyce_retum	AZ_Boyce_retum	AZ_Boyce_retum	5
AZ_Boyce_retum	AZ_Boyce_retum	AZ_Boyce_retum	4
AZ_Boyce_retum	AZ_Boyce_retum	AZ_Boyce_retum	4
AZ_Boyce_retum	AZ_Boyce_retum	AZ_Boyce_retum	4
AZ_Boyce_retum	AZ_Boyce_retum	AZ_Boyce_retum	4
AZ_Boyce_retum	AZ_Boyce_retum	AZ_Boyce_retum	4
AZ_Boyce_retum	AZ_Boyce_retum	AZ_Boyce_retum	4
AZ_Boyce_retum	AZ_Boyce_retum	AZ_Boyce_retum	3
AZ_Boyce_retum	AZ_Boyce_retum	AZ_Boyce_retum	2
AZ_Boyce_retum	AZ_Boyce_retum	AZ_Boyce_retum	2
AZ_Boyce_retum	AZ_Boyce_retum	AZ_Boyce_retum	2
AZ_Boyce_retum	AZ_Boyce_retum	AZ_Boyce_retum	2
AZ_Boyce_retum	AZ_Boyce_retum	AZ_Boyce_retum	1
AZ_Boyce_retum	AZ_Boyce_retum	AZ_Boyce_retum	1
AZ_Boyce_retum	AZ_Boyce_retum	AZ_Boyce_retum	1
AZ_Boyce_retum	AZ_Boyce_retum	AZ_Boyce_retum	1
AZ_Boyce_retum	AZ_Boyce_retum	AZ_Boyce_retum	1
AZ_Boyce_retum	AZ_Boyce_retum	AZ_Boyce_retum	1
AZ_Boyce_retum	AZ_Boyce_retum	AZ_Boyce_retum	1
AZ_Boyce_retum	AZ_Boyce_retum	AZ_Boyce_retum	1
AZ_Boyce_retum	AZ_Boyce_retum	AZ_Boyce_retum	1
AZ_Boyce_retum	AZ_Boyce_retum	AZ_Boyce_retum	1
AZ_Boyce_retum	AZ_Boyce_retum	AZ_Boyce_retum	1
AZ_Patag_gonia	AZ_Patag_gonia	AZ_Patag_gonia	478
AZ_Patag_gonia	AZ_Patag_gonia	AZ_Patag_gonia	354
AZ_Patag_gonia	AZ_Patag_gonia	AZ_Patag_gonia	353
AZ_Patag_gonia	AZ_Patag_gonia	AZ_Patag_gonia	278
AZ_Patag_gonia	AZ_Patag_gonia	AZ_Patag_gonia	266
AZ_Patag_gonia	AZ_Patag_gonia	AZ_Patag_gonia	245
AZ_Patag_gonia	AZ_Patag_gonia	AZ_Patag_gonia	226
AZ_Patag_gonia	AZ_Patag_gonia	AZ_Patag_gonia	209
AZ_Patag_gonia	AZ_Patag_gonia	AZ_Patag_gonia	188
AZ_Patag_gonia	AZ_Patag_gonia	AZ_Patag_gonia	182
AZ_Patag_gonia	AZ_Patag_gonia	AZ_Patag_gonia	161
AZ_Patag_gonia	AZ_Patag_gonia	AZ_Patag_gonia	137
AZ_Patag_gonia	AZ_Patag_gonia	AZ_Patag_gonia	134
AZ_Patag_gonia	AZ_Patag_gonia	AZ_Patag_gonia	90
AZ_Patag_gonia	AZ_Patag_gonia	AZ_Patag_gonia	84
AZ_Patag_gonia	AZ_Patag_gonia	AZ_Patag_gonia	69
AZ_Patag_gonia	AZ_Patag_gonia	AZ_Patag_gonia	69
AZ_Patag_gonia	AZ_Patag_gonia	AZ_Patag_gonia	66
AZ_Patag_gonia	AZ_Patag_gonia	AZ_Patag_gonia	57
AZ_Patag_gonia	AZ_Patag_gonia	AZ_Patag_gonia	55
AZ_Patag_gonia	AZ_Patag_gonia	AZ_Patag_gonia	54
AZ_Patag_gonia	AZ_Patag_gonia	AZ_Patag_gonia	50
AZ_Patag_gonia	AZ_Patag_gonia	AZ_Patag_gonia	46
AZ_Patag_gonia	AZ_Patag_gonia	AZ_Patag_gonia	46
AZ_Patag_gonia	AZ_Patag_gonia	AZ_Patag_gonia	46
AZ_Patag_gonia	AZ_Patag_gonia	AZ_Patag_gonia	44
AZ_Patag_gonia	AZ_Patag_gonia	AZ_Patag_gonia	43
AZ_Patag_gonia	AZ_Patag_gonia	AZ_Patag_gonia	33
AZ_Patag_gonia	AZ_Patag_gonia	AZ_Patag_gonia	32
AZ_Patag_gonia	AZ_Patag_gonia	AZ_Patag_gonia	32
AZ_Patag_gonia	AZ_Patag_gonia	AZ_Patag_gonia	31
AZ_Patag_gonia	AZ_Patag_gonia	AZ_Patag_gonia	31
AZ_Patag_gonia	AZ_Patag_gonia	AZ_Patag_gonia	30
AZ_Patag_gonia	AZ_Patag_gonia	AZ_Patag_gonia	27
AZ_Patag_gonia	AZ_Patag_gonia	AZ_Patag_gonia	27
AZ_Patag_gonia	AZ_Patag_gonia	AZ_Patag_gonia	25
AZ_Patag_gonia	AZ_Patag_gonia	AZ_Patag_gonia	23
AZ_Patag_gonia	AZ_Patag_gonia	AZ_Patag_gonia	23
AZ_Patag_gonia	AZ_Patag_gonia	AZ_Patag_gonia	20
AZ_Patag_gonia	AZ_Patag_gonia	AZ_Patag_gonia	19
AZ_Patag_gonia	AZ_Patag_gonia	AZ_Patag_gonia	18
AZ_Patag_gonia	AZ_Patag_gonia	AZ_Patag_gonia	18
AZ_Patag_gonia	AZ_Patag_gonia	AZ_Patag_gonia	17
AZ_Patag_gonia	AZ_Patag_gonia	AZ_Patag_gonia	14
AZ_Patag_gonia	AZ_Patag_gonia	AZ_Patag_gonia	13
AZ_Patag_gonia	AZ_Patag_gonia	AZ_Patag_gonia	12
AZ_Patag_gonia	AZ_Patag_gonia	AZ_Patag_gonia	11
AZ_Patag_gonia	AZ_Patag_gonia	AZ_Patag_gonia	10
AZ_Patag_gonia	AZ_Patag_gonia	AZ_Patag_gonia	10
AZ_Patag_gonia	AZ_Patag_gonia	AZ_Patag_gonia	10
AZ_Patag_gonia	AZ_Patag_gonia	AZ_Patag_gonia	9
AZ_Patag_gonia	AZ_Patag_gonia	AZ_Patag_gonia	9
AZ_Patag_gonia	AZ_Patag_gonia	AZ_Patag_gonia	8
AZ_Patag_gonia	AZ_Patag_gonia	AZ_Patag_gonia	8
AZ_Patag_gonia	AZ_Patag_gonia	AZ_Patag_gonia	8
AZ_Patag_gonia	AZ_Patag_gonia	AZ_Patag_gonia	7
AZ_Patag_gonia	AZ_Patag_gonia	AZ_Patag_gonia	7
AZ_Patag_gonia	AZ_Patag_gonia	AZ_Patag_gonia	6
AZ_Patag_gonia	AZ_Patag_gonia	AZ_Patag_gonia	5
AZ_Patag_gonia	AZ_Patag_gonia	AZ_Patag_gonia	5
AZ_Patag_gonia	AZ_Patag_gonia	AZ_Patag_gonia	5
AZ_Patag_gonia	AZ_Patag_gonia	AZ_Patag_gonia	5
AZ_Patag_gonia	AZ_Patag_gonia	AZ_Patag_gonia	5
AZ_Patag_gonia	AZ_Patag_gonia	AZ_Patag_gonia	5
AZ_Patag_gonia	AZ_Patag_gonia	AZ_Patag_gonia	4
AZ_Patag_gonia	AZ_Patag_gonia	AZ_Patag_gonia	4
AZ_Patag_gonia	AZ_Patag_gonia	AZ_Patag_gonia	4
AZ_Patag_gonia	AZ_Patag_gonia	AZ_Patag_gonia	3
AZ_Patag_gonia	AZ_Patag_gonia	AZ_Patag_gonia	3
AZ_Patag_gonia	AZ_Patag_gonia	AZ_Patag_gonia	3
AZ_Patag_gonia	AZ_Patag_gonia	AZ_Patag_gonia	3
AZ_Patag_gonia	AZ_Patag_gonia	AZ_Patag_gonia	2
AZ_Patag_gonia	AZ_Patag_gonia	AZ_Patag_gonia	2
AZ_Patag_gonia	AZ_Patag_gonia	AZ_Patag_gonia	2
AZ_Patag_gonia	AZ_Patag_gonia	AZ_Patag_gonia	1
AZ_Patag_gonia	AZ_Patag_gonia	AZ_Patag_gonia	1
AZ_Patag_gonia	AZ_Patag_gonia	AZ_Patag_gonia	1
AZ_Patag_gonia	AZ_Patag_gonia	AZ_Patag_gonia	1
AZ_Patag_gonia	AZ_Patag_gonia	AZ_Patag_gonia	1
AZ_Patag_gonia	AZ_Patag_gonia	AZ_Patag_gonia	1
AZ_Patag_gonia	AZ_Patag_gonia	AZ_Patag_gonia	1
AZ_Patag_gonia	AZ_Patag_gonia	AZ_Patag_gonia	1
AZ_Patag_gonia	AZ_Patag_gonia	AZ_Patag_gonia	1
AZ_Patag_gonia	AZ_Patag_gonia	AZ_Patag_gonia	1
AZ_Patag_gonia	AZ_Patag_gonia	AZ_Patag_gonia	1
AZ_Patag_gonia	AZ_Patag_gonia	AZ_Patag_gonia	1
AZ_Patag_gonia	AZ_Patag_gonia	AZ_Patag_gonia	1
AZ_Patag_gonia	AZ_Patag_gonia	AZ_Patag_gonia	1
AZ_Patag_gonia	AZ_Patag_gonia	AZ_Patag_gonia	1
AZ_Porta_ortal	AZ_Porta_ortal	AZ_Porta_ortal	191
AZ_Porta_ortal	AZ_Porta_ortal	AZ_Porta_ortal	155
AZ_Porta_ortal	AZ_Porta_ortal	AZ_Porta_ortal	40
AZ_Porta_ortal	AZ_Porta_ortal	AZ_Porta_ortal	38
AZ_Porta_ortal	AZ_Porta_ortal	AZ_Porta_ortal	32
AZ_Porta_ortal	AZ_Porta_ortal	AZ_Porta_ortal	31
AZ_Porta_ortal	AZ_Porta_ortal	AZ_Porta_ortal	25
AZ_Porta_ortal	AZ_Porta_ortal	AZ_Porta_ortal	21
AZ_Porta_ortal	AZ_Porta_ortal	AZ_Porta_ortal	19
AZ_Porta_ortal	AZ_Porta_ortal	AZ_Porta_ortal	19
AZ_Porta_ortal	AZ_Porta_ortal	AZ_Porta_ortal	17
AZ_Porta_ortal	AZ_Porta_ortal	AZ_Porta_ortal	17
AZ_Porta_ortal	AZ_Porta_ortal	AZ_Porta_ortal	17
AZ_Porta_ortal	AZ_Porta_ortal	AZ_Porta_ortal	16
AZ_Porta_ortal	AZ_Porta_ortal	AZ_Porta_ortal	14
AZ_Porta_ortal	AZ_Porta_ortal	AZ_Porta_ortal	14
AZ_Porta_ortal	AZ_Porta_ortal	AZ_Porta_ortal	14
AZ_Porta_ortal	AZ_Porta_ortal	AZ_Porta_ortal	11
AZ_Porta_ortal	AZ_Porta_ortal	AZ_Porta_ortal	10
AZ_Porta_ortal	AZ_Porta_ortal	AZ_Porta_ortal	10
AZ_Porta_ortal	AZ_Porta_ortal	AZ_Porta_ortal	9
AZ_Porta_ortal	AZ_Porta_ortal	AZ_Porta_ortal	9
AZ_Porta_ortal	AZ_Porta_ortal	AZ_Porta_ortal	8
AZ_Porta_ortal	AZ_Porta_ortal	AZ_Porta_ortal	8
AZ_Porta_ortal	AZ_Porta_ortal	AZ_Porta_ortal	8
AZ_Porta_ortal	AZ_Porta_ortal	AZ_Porta_ortal	8
AZ_Porta_ortal	AZ_Porta_ortal	AZ_Porta_ortal	8
AZ_Porta_ortal	AZ_Porta_ortal	AZ_Porta_ortal	7
AZ_Porta_ortal	AZ_Porta_ortal	AZ_Porta_ortal	7
AZ_Porta_ortal	AZ_Porta_ortal	AZ_Porta_ortal	6
AZ_Porta_ortal	AZ_Porta_ortal	AZ_Porta_ortal	5
AZ_Porta_ortal	AZ_Porta_ortal	AZ_Porta_ortal	5
AZ_Porta_ortal	AZ_Porta_ortal	AZ_Porta_ortal	5
AZ_Porta_ortal	AZ_Porta_ortal	AZ_Porta_ortal	4
AZ_Porta_ortal	AZ_Porta_ortal	AZ_Porta_ortal	4
AZ_Porta_ortal	AZ_Porta_ortal	AZ_Porta_ortal	3
AZ_Porta_ortal	AZ_Porta_ortal	AZ_Porta_ortal	3
AZ_Porta_ortal	AZ_Porta_ortal	AZ_Porta_ortal	3
AZ_Porta_ortal	AZ_Porta_ortal	AZ_Porta_ortal	3
AZ_Porta_ortal	AZ_Porta_ortal	AZ_Porta_ortal	3
AZ_Porta_ortal	AZ_Porta_ortal	AZ_Porta_ortal	3
AZ_Porta_ortal	AZ_Porta_ortal	AZ_Porta_ortal	3
AZ_Porta_ortal	AZ_Porta_ortal	AZ_Porta_ortal	3
AZ_Porta_ortal	AZ_Porta_ortal	AZ_Porta_ortal	3
AZ_Porta_ortal	AZ_Porta_ortal	AZ_Porta_ortal	2
AZ_Porta_ortal	AZ_Porta_ortal	AZ_Porta_ortal	2
AZ_Porta_ortal	AZ_Porta_ortal	AZ_Porta_ortal	2
AZ_Porta_ortal	AZ_Porta_ortal	AZ_Porta_ortal	2
AZ_Porta_ortal	AZ_Porta_ortal	AZ_Porta_ortal	2
AZ_Porta_ortal	AZ_Porta_ortal	AZ_Porta_ortal	1
AZ_Porta_ortal	AZ_Porta_ortal	AZ_Porta_ortal	1
AZ_Porta_ortal	AZ_Porta_ortal	AZ_Porta_ortal	1
AZ_Porta_ortal	AZ_Porta_ortal	AZ_Porta_ortal	1
AZ_Porta_ortal	AZ_Porta_ortal	AZ_Porta_ortal	1
AZ_Porta_ortal	AZ_Porta_ortal	AZ_Porta_ortal	1
AZ_Porta_ortal	AZ_Porta_ortal	AZ_Porta_ortal	1
AZ_Porta_ortal	AZ_Porta_ortal	AZ_Porta_ortal	1
AZ_Porta_ortal	AZ_Porta_ortal	AZ_Porta_ortal	1
AZ_Porta_ortal	AZ_Porta_ortal	AZ_Porta_ortal	1
AZ_Porta_ortal	AZ_Porta_ortal	AZ_Porta_ortal	1
AZ_Porta_ortal	AZ_Porta_ortal	AZ_Porta_ortal	1
AZ_Porta_ortal	AZ_Porta_ortal	AZ_Porta_ortal	1
AZ_Ramse_anyon	AZ_Ramse_anyon	AZ_Ramse_anyon	214
AZ_Ramse_anyon	AZ_Ramse_anyon	AZ_Ramse_anyon	127
AZ_Ramse_anyon	AZ_Ramse_anyon	AZ_Ramse_anyon	125
AZ_Ramse_anyon	AZ_Ramse_anyon	AZ_Ramse_anyon	112
AZ_Ramse_anyon	AZ_Ramse_anyon	AZ_Ramse_anyon	104
AZ_Ramse_anyon	AZ_Ramse_anyon	AZ_Ramse_anyon	99
AZ_Ramse_anyon	AZ_Ramse_anyon	AZ_Ramse_anyon	81
AZ_Ramse_anyon	AZ_Ramse_anyon	AZ_Ramse_anyon	79
AZ_Ramse_anyon	AZ_Ramse_anyon	AZ_Ramse_anyon	62
AZ_Ramse_anyon	AZ_Ramse_anyon	AZ_Ramse_anyon	61
AZ_Ramse_anyon	AZ_Ramse_anyon	AZ_Ramse_anyon	50
AZ_Ramse_anyon	AZ_Ramse_anyon	AZ_Ramse_anyon	49
AZ_Ramse_anyon	AZ_Ramse_anyon	AZ_Ramse_anyon	49
AZ_Ramse_anyon	AZ_Ramse_anyon	AZ_Ramse_anyon	47
AZ_Ramse_anyon	AZ_Ramse_anyon	AZ_Ramse_anyon	42
AZ_Ramse_anyon	AZ_Ramse_anyon	AZ_Ramse_anyon	34
AZ_Ramse_anyon	AZ_Ramse_anyon	AZ_Ramse_anyon	33
AZ_Ramse_anyon	AZ_Ramse_anyon	AZ_Ramse_anyon	29
AZ_Ramse_anyon	AZ_Ramse_anyon	AZ_Ramse_anyon	28
AZ_Ramse_anyon	AZ_Ramse_anyon	AZ_Ramse_anyon	27
AZ_Ramse_anyon	AZ_Ramse_anyon	AZ_Ramse_anyon	23
AZ_Ramse_anyon	AZ_Ramse_anyon	AZ_Ramse_anyon	21
AZ_Ramse_anyon	AZ_Ramse_anyon	AZ_Ramse_anyon	19
AZ_Ramse_anyon	AZ_Ramse_anyon	AZ_Ramse_anyon	19
AZ_Ramse_anyon	AZ_Ramse_anyon	AZ_Ramse_anyon	18
AZ_Ramse_anyon	AZ_Ramse_anyon	AZ_Ramse_anyon	18
AZ_Ramse_anyon	AZ_Ramse_anyon	AZ_Ramse_anyon	17
AZ_Ramse_anyon	AZ_Ramse_anyon	AZ_Ramse_anyon	17
AZ_Ramse_anyon	AZ_Ramse_anyon	AZ_Ramse_anyon	16
AZ_Ramse_anyon	AZ_Ramse_anyon	AZ_Ramse_anyon	16
AZ_Ramse_anyon	AZ_Ramse_anyon	AZ_Ramse_anyon	15
AZ_Ramse_anyon	AZ_Ramse_anyon	AZ_Ramse_anyon	14
AZ_Ramse_anyon	AZ_Ramse_anyon	AZ_Ramse_anyon	14
AZ_Ramse_anyon	AZ_Ramse_anyon	AZ_Ramse_anyon	14
AZ_Ramse_anyon	AZ_Ramse_anyon	AZ_Ramse_anyon	14
AZ_Ramse_anyon	AZ_Ramse_anyon	AZ_Ramse_anyon	13
AZ_Ramse_anyon	AZ_Ramse_anyon	AZ_Ramse_anyon	13
AZ_Ramse_anyon	AZ_Ramse_anyon	AZ_Ramse_anyon	12
AZ_Ramse_anyon	AZ_Ramse_anyon	AZ_Ramse_anyon	12
AZ_Ramse_anyon	AZ_Ramse_anyon	AZ_Ramse_anyon	11
AZ_Ramse_anyon	AZ_Ramse_anyon	AZ_Ramse_anyon	11
AZ_Ramse_anyon	AZ_Ramse_anyon	AZ_Ramse_anyon	11
AZ_Ramse_anyon	AZ_Ramse_anyon	AZ_Ramse_anyon	11
AZ_Ramse_anyon	AZ_Ramse_anyon	AZ_Ramse_anyon	11
AZ_Ramse_anyon	AZ_Ramse_anyon	AZ_Ramse_anyon	10
AZ_Ramse_anyon	AZ_Ramse_anyon	AZ_Ramse_anyon	9
AZ_Ramse_anyon	AZ_Ramse_anyon	AZ_Ramse_anyon	9
AZ_Ramse_anyon	AZ_Ramse_anyon	AZ_Ramse_anyon	8
AZ_Ramse_anyon	AZ_Ramse_anyon	AZ_Ramse_anyon	8
AZ_Ramse_anyon	AZ_Ramse_anyon	AZ_Ramse_anyon	7
AZ_Ramse_anyon	AZ_Ramse_anyon	AZ_Ramse_anyon	6
AZ_Ramse_anyon	AZ_Ramse_anyon	AZ_Ramse_anyon	6
AZ_Ramse_anyon	AZ_Ramse_anyon	AZ_Ramse_anyon	5
AZ_Ramse_anyon	AZ_Ramse_anyon	AZ_Ramse_anyon	5
AZ_Ramse_anyon	AZ_Ramse_anyon	AZ_Ramse_anyon	5
AZ_Ramse_anyon	AZ_Ramse_anyon	AZ_Ramse_anyon	5
AZ_Ramse_anyon	AZ_Ramse_anyon	AZ_Ramse_anyon	4
AZ_Ramse_anyon	AZ_Ramse_anyon	AZ_Ramse_anyon	4
AZ_Ramse_anyon	AZ_Ramse_anyon	AZ_Ramse_anyon	4
AZ_Ramse_anyon	AZ_Ramse_anyon	AZ_Ramse_anyon	4
AZ_Ramse_anyon	AZ_Ramse_anyon	AZ_Ramse_anyon	4
AZ_Ramse_anyon	AZ_Ramse_anyon	AZ_Ramse_anyon	4
AZ_Ramse_anyon	AZ_Ramse_anyon	AZ_Ramse_anyon	3
AZ_Ramse_anyon	AZ_Ramse_anyon	AZ_Ramse_anyon	3
AZ_Ramse_anyon	AZ_Ramse_anyon	AZ_Ramse_anyon	3
AZ_Ramse_anyon	AZ_Ramse_anyon	AZ_Ramse_anyon	3
AZ_Ramse_anyon	AZ_Ramse_anyon	AZ_Ramse_anyon	3
AZ_Ramse_anyon	AZ_Ramse_anyon	AZ_Ramse_anyon	3
AZ_Ramse_anyon	AZ_Ramse_anyon	AZ_Ramse_anyon	3
AZ_Ramse_anyon	AZ_Ramse_anyon	AZ_Ramse_anyon	3
AZ_Ramse_anyon	AZ_Ramse_anyon	AZ_Ramse_anyon	3
AZ_Ramse_anyon	AZ_Ramse_anyon	AZ_Ramse_anyon	2
AZ_Ramse_anyon	AZ_Ramse_anyon	AZ_Ramse_anyon	2
AZ_Ramse_anyon	AZ_Ramse_anyon	AZ_Ramse_anyon	2
AZ_Ramse_anyon	AZ_Ramse_anyon	AZ_Ramse_anyon	2
AZ_Ramse_anyon	AZ_Ramse_anyon	AZ_Ramse_anyon	2
AZ_Ramse_anyon	AZ_Ramse_anyon	AZ_Ramse_anyon	2
AZ_Ramse_anyon	AZ_Ramse_anyon	AZ_Ramse_anyon	2
AZ_Ramse_anyon	AZ_Ramse_anyon	AZ_Ramse_anyon	2
AZ_Ramse_anyon	AZ_Ramse_anyon	AZ_Ramse_anyon	1
AZ_Ramse_anyon	AZ_Ramse_anyon	AZ_Ramse_anyon	1
AZ_Ramse_anyon	AZ_Ramse_anyon	AZ_Ramse_anyon	1
AZ_Ramse_anyon	AZ_Ramse_anyon	AZ_Ramse_anyon	1
AZ_Ramse_anyon	AZ_Ramse_anyon	AZ_Ramse_anyon	1
AZ_Ramse_anyon	AZ_Ramse_anyon	AZ_Ramse_anyon	1
AZ_Ramse_anyon	AZ_Ramse_anyon	AZ_Ramse_anyon	1
AZ_Ramse_anyon	AZ_Ramse_anyon	AZ_Ramse_anyon	1
AZ_Ramse_anyon	AZ_Ramse_anyon	AZ_Ramse_anyon	1
AZ_Ramse_anyon	AZ_Ramse_anyon	AZ_Ramse_anyon	1
AZ_Ramse_anyon	AZ_Ramse_anyon	AZ_Ramse_anyon	1
AZ_Ramse_anyon	AZ_Ramse_anyon	AZ_Ramse_anyon	1
AZ_Ramse_anyon	AZ_Ramse_anyon	AZ_Ramse_anyon	1
AZ_Ramse_anyon	AZ_Ramse_anyon	AZ_Ramse_anyon	1
AZ_Ramse_anyon	AZ_Ramse_anyon	AZ_Ramse_anyon	1
AZ_Ramse_anyon	AZ_Ramse_anyon	AZ_Ramse_anyon	1
AZ_Sabin_anyon	AZ_Sabin_anyon	AZ_Sabin_anyon	81
AZ_Sabin_anyon	AZ_Sabin_anyon	AZ_Sabin_anyon	57
AZ_Sabin_anyon	AZ_Sabin_anyon	AZ_Sabin_anyon	48
AZ_Sabin_anyon	AZ_Sabin_anyon	AZ_Sabin_anyon	32
AZ_Sabin_anyon	AZ_Sabin_anyon	AZ_Sabin_anyon	26
AZ_Sabin_anyon	AZ_Sabin_anyon	AZ_Sabin_anyon	22
AZ_Sabin_anyon	AZ_Sabin_anyon	AZ_Sabin_anyon	21
AZ_Sabin_anyon	AZ_Sabin_anyon	AZ_Sabin_anyon	20
AZ_Sabin_anyon	AZ_Sabin_anyon	AZ_Sabin_anyon	19
AZ_Sabin_anyon	AZ_Sabin_anyon	AZ_Sabin_anyon	18
AZ_Sabin_anyon	AZ_Sabin_anyon	AZ_Sabin_anyon	13
AZ_Sabin_anyon	AZ_Sabin_anyon	AZ_Sabin_anyon	13
AZ_Sabin_anyon	AZ_Sabin_anyon	AZ_Sabin_anyon	11
AZ_Sabin_anyon	AZ_Sabin_anyon	AZ_Sabin_anyon	10
AZ_Sabin_anyon	AZ_Sabin_anyon	AZ_Sabin_anyon	10
AZ_Sabin_anyon	AZ_Sabin_anyon	AZ_Sabin_anyon	10
AZ_Sabin_anyon	AZ_Sabin_anyon	AZ_Sabin_anyon	9
AZ_Sabin_anyon	AZ_Sabin_anyon	AZ_Sabin_anyon	8
AZ_Sabin_anyon	AZ_Sabin_anyon	AZ_Sabin_anyon	7
AZ_Sabin_anyon	AZ_Sabin_anyon	AZ_Sabin_anyon	7
AZ_Sabin_anyon	AZ_Sabin_anyon	AZ_Sabin_anyon	7
AZ_Sabin_anyon	AZ_Sabin_anyon	AZ_Sabin_anyon	6
AZ_Sabin_anyon	AZ_Sabin_anyon	AZ_Sabin_anyon	4
AZ_Sabin_anyon	AZ_Sabin_anyon	AZ_Sabin_anyon	4
AZ_Sabin_anyon	AZ_Sabin_anyon	AZ_Sabin_anyon	4
AZ_Sabin_anyon	AZ_Sabin_anyon	AZ_Sabin_anyon	4
AZ_Sabin_anyon	AZ_Sabin_anyon	AZ_Sabin_anyon	4
AZ_Sabin_anyon	AZ_Sabin_anyon	AZ_Sabin_anyon	4
AZ_Sabin_anyon	AZ_Sabin_anyon	AZ_Sabin_anyon	3
AZ_Sabin_anyon	AZ_Sabin_anyon	AZ_Sabin_anyon	3
AZ_Sabin_anyon	AZ_Sabin_anyon	AZ_Sabin_anyon	3
AZ_Sabin_anyon	AZ_Sabin_anyon	AZ_Sabin_anyon	3
AZ_Sabin_anyon	AZ_Sabin_anyon	AZ_Sabin_anyon	2
AZ_Sabin_anyon	AZ_Sabin_anyon	AZ_Sabin_anyon	2
AZ_Sabin_anyon	AZ_Sabin_anyon	AZ_Sabin_anyon	2
AZ_Sabin_anyon	AZ_Sabin_anyon	AZ_Sabin_anyon	2
AZ_Sabin_anyon	AZ_Sabin_anyon	AZ_Sabin_anyon	2
AZ_Sabin_anyon	AZ_Sabin_anyon	AZ_Sabin_anyon	2
AZ_Sabin_anyon	AZ_Sabin_anyon	AZ_Sabin_anyon	2
AZ_Sabin_anyon	AZ_Sabin_anyon	AZ_Sabin_anyon	2
AZ_Sabin_anyon	AZ_Sabin_anyon	AZ_Sabin_anyon	2
AZ_Sabin_anyon	AZ_Sabin_anyon	AZ_Sabin_anyon	2
AZ_Sabin_anyon	AZ_Sabin_anyon	AZ_Sabin_anyon	1
AZ_Sabin_anyon	AZ_Sabin_anyon	AZ_Sabin_anyon	1
AZ_Sabin_anyon	AZ_Sabin_anyon	AZ_Sabin_anyon	1
AZ_Sabin_anyon	AZ_Sabin_anyon	AZ_Sabin_anyon	1
AZ_Sabin_anyon	AZ_Sabin_anyon	AZ_Sabin_anyon	1
AZ_Sabin_anyon	AZ_Sabin_anyon	AZ_Sabin_anyon	1
AZ_Sabin_anyon	AZ_Sabin_anyon	AZ_Sabin_anyon	1
AZ_Sabin_anyon	AZ_Sabin_anyon	AZ_Sabin_anyon	1
CA_Benic_nicia	CA_Benic_nicia	CA_Benic_nicia	108
CA_Benic_nicia	CA_Benic_nicia	CA_Benic_nicia	81
CA_Benic_nicia	CA_Benic_nicia	CA_Benic_nicia	63
CA_Benic_nicia	CA_Benic_nicia	CA_Benic_nicia	36
CA_Benic_nicia	CA_Benic_nicia	CA_Benic_nicia	27
CA_Benic_nicia	CA_Benic_nicia	CA_Benic_nicia	21
CA_Benic_nicia	CA_Benic_nicia	CA_Benic_nicia	16
CA_Benic_nicia	CA_Benic_nicia	CA_Benic_nicia	16
CA_Benic_nicia	CA_Benic_nicia	CA_Benic_nicia	15
CA_Benic_nicia	CA_Benic_nicia	CA_Benic_nicia	13
CA_Benic_nicia	CA_Benic_nicia	CA_Benic_nicia	12
CA_Benic_nicia	CA_Benic_nicia	CA_Benic_nicia	10
CA_Benic_nicia	CA_Benic_nicia	CA_Benic_nicia	10
CA_Benic_nicia	CA_Benic_nicia	CA_Benic_nicia	8
CA_Benic_nicia	CA_Benic_nicia	CA_Benic_nicia	8
CA_Benic_nicia	CA_Benic_nicia	CA_Benic_nicia	6
CA_Benic_nicia	CA_Benic_nicia	CA_Benic_nicia	5
CA_Benic_nicia	CA_Benic_nicia	CA_Benic_nicia	5
CA_Benic_nicia	CA_Benic_nicia	CA_Benic_nicia	4
CA_Benic_nicia	CA_Benic_nicia	CA_Benic_nicia	4
CA_Benic_nicia	CA_Benic_nicia	CA_Benic_nicia	3
CA_Benic_nicia	CA_Benic_nicia	CA_Benic_nicia	3
CA_Benic_nicia	CA_Benic_nicia	CA_Benic_nicia	3
CA_Benic_nicia	CA_Benic_nicia	CA_Benic_nicia	3
CA_Benic_nicia	CA_Benic_nicia	CA_Benic_nicia	2
CA_Benic_nicia	CA_Benic_nicia	CA_Benic_nicia	2
CA_Benic_nicia	CA_Benic_nicia	CA_Benic_nicia	2
CA_Benic_nicia	CA_Benic_nicia	CA_Benic_nicia	2
CA_Benic_nicia	CA_Benic_nicia	CA_Benic_nicia	1
CA_Benic_nicia	CA_Benic_nicia	CA_Benic_nicia	1
CA_Benic_nicia	CA_Benic_nicia	CA_Benic_nicia	1
CA_Benic_nicia	CA_Benic_nicia	CA_Benic_nicia	1
CA_Benic_nicia	CA_Benic_nicia	CA_Benic_nicia	1
CA_Benic_nicia	CA_Benic_nicia	CA_Benic_nicia	1
CA_Berke_keley	CA_Berke_keley	CA_Berke_keley	200
CA_Berke_keley	CA_Berke_keley	CA_Berke_keley	181
CA_Berke_keley	CA_Berke_keley	CA_Berke_keley	159
CA_Berke_keley	CA_Berke_keley	CA_Berke_keley	117
CA_Berke_keley	CA_Berke_keley	CA_Berke_keley	86
CA_Berke_keley	CA_Berke_keley	CA_Berke_keley	58
CA_Berke_keley	CA_Berke_keley	CA_Berke_keley	56
CA_Berke_keley	CA_Berke_keley	CA_Berke_keley	48
CA_Berke_keley	CA_Berke_keley	CA_Berke_keley	45
CA_Berke_keley	CA_Berke_keley	CA_Berke_keley	44
CA_Berke_keley	CA_Berke_keley	CA_Berke_keley	42
CA_Berke_keley	CA_Berke_keley	CA_Berke_keley	36
CA_Berke_keley	CA_Berke_keley	CA_Berke_keley	29
CA_Berke_keley	CA_Berke_keley	CA_Berke_keley	18
CA_Berke_keley	CA_Berke_keley	CA_Berke_keley	14
CA_Berke_keley	CA_Berke_keley	CA_Berke_keley	13
CA_Berke_keley	CA_Berke_keley	CA_Berke_keley	12
CA_Berke_keley	CA_Berke_keley	CA_Berke_keley	12
CA_Berke_keley	CA_Berke_keley	CA_Berke_keley	10
CA_Berke_keley	CA_Berke_keley	CA_Berke_keley	10
CA_Berke_keley	CA_Berke_keley	CA_Berke_keley	9
CA_Berke_keley	CA_Berke_keley	CA_Berke_keley	8
CA_Berke_keley	CA_Berke_keley	CA_Berke_keley	7
CA_Berke_keley	CA_Berke_keley	CA_Berke_keley	7
CA_Berke_keley	CA_Berke_keley	CA_Berke_keley	6
CA_Berke_keley	CA_Berke_keley	CA_Berke_keley	6
CA_Berke_keley	CA_Berke_keley	CA_Berke_keley	6
CA_Berke_keley	CA_Berke_keley	CA_Berke_keley	6
CA_Berke_keley	CA_Berke_keley	CA_Berke_keley	6
CA_Berke_keley	CA_Berke_keley	CA_Berke_keley	5
CA_Berke_keley	CA_Berke_keley	CA_Berke_keley	5
CA_Berke_keley	CA_Berke_keley	CA_Berke_keley	4
CA_Berke_keley	CA_Berke_keley	CA_Berke_keley	4
CA_Berke_keley	CA_Berke_keley	CA_Berke_keley	3
CA_Berke_keley	CA_Berke_keley	CA_Berke_keley	3
CA_Berke_keley	CA_Berke_keley	CA_Berke_keley	3
CA_Berke_keley	CA_Berke_keley	CA_Berke_keley	3
CA_Berke_keley	CA_Berke_keley	CA_Berke_keley	3
CA_Berke_keley	CA_Berke_keley	CA_Berke_keley	2
CA_Berke_keley	CA_Berke_keley	CA_Berke_keley	2
CA_Berke_keley	CA_Berke_keley	CA_Berke_keley	2
CA_Berke_keley	CA_Berke_keley	CA_Berke_keley	1
CA_Berke_keley	CA_Berke_keley	CA_Berke_keley	1
CA_Berke_keley	CA_Berke_keley	CA_Berke_keley	1
CA_Berke_keley	CA_Berke_keley	CA_Berke_keley	1
CA_Berke_keley	CA_Berke_keley	CA_Berke_keley	1
CA_Berke_keley	CA_Berke_keley	CA_Berke_keley	1
CA_Big C_Creek	CA_Big C_Creek	CA_Big C_Creek	307
CA_Big C_Creek	CA_Big C_Creek	CA_Big C_Creek	82
CA_Big C_Creek	CA_Big C_Creek	CA_Big C_Creek	65
CA_Big C_Creek	CA_Big C_Creek	CA_Big C_Creek	56
CA_Big C_Creek	CA_Big C_Creek	CA_Big C_Creek	39
CA_Big C_Creek	CA_Big C_Creek	CA_Big C_Creek	27
CA_Big C_Creek	CA_Big C_Creek	CA_Big C_Creek	27
CA_Big C_Creek	CA_Big C_Creek	CA_Big C_Creek	22
CA_Big C_Creek	CA_Big C_Creek	CA_Big C_Creek	20
CA_Big C_Creek	CA_Big C_Creek	CA_Big C_Creek	16
CA_Big C_Creek	CA_Big C_Creek	CA_Big C_Creek	14
CA_Big C_Creek	CA_Big C_Creek	CA_Big C_Creek	10
CA_Big C_Creek	CA_Big C_Creek	CA_Big C_Creek	10
CA_Big C_Creek	CA_Big C_Creek	CA_Big C_Creek	9
CA_Big C_Creek	CA_Big C_Creek	CA_Big C_Creek	8
CA_Big C_Creek	CA_Big C_Creek	CA_Big C_Creek	8
CA_Big C_Creek	CA_Big C_Creek	CA_Big C_Creek	7
CA_Big C_Creek	CA_Big C_Creek	CA_Big C_Creek	6
CA_Big C_Creek	CA_Big C_Creek	CA_Big C_Creek	4
CA_Big C_Creek	CA_Big C_Creek	CA_Big C_Creek	4
CA_Big C_Creek	CA_Big C_Creek	CA_Big C_Creek	4
CA_Big C_Creek	CA_Big C_Creek	CA_Big C_Creek	3
CA_Big C_Creek	CA_Big C_Creek	CA_Big C_Creek	3
CA_Big C_Creek	CA_Big C_Creek	CA_Big C_Creek	3
CA_Big C_Creek	CA_Big C_Creek	CA_Big C_Creek	3
CA_Big C_Creek	CA_Big C_Creek	CA_Big C_Creek	2
CA_Big C_Creek	CA_Big C_Creek	CA_Big C_Creek	2
CA_Big C_Creek	CA_Big C_Creek	CA_Big C_Creek	2
CA_Big C_Creek	CA_Big C_Creek	CA_Big C_Creek	2
CA_Big C_Creek	CA_Big C_Creek	CA_Big C_Creek	2
CA_Big C_Creek	CA_Big C_Creek	CA_Big C_Creek	2
CA_Big C_Creek	CA_Big C_Creek	CA_Big C_Creek	2
CA_Big C_Creek	CA_Big C_Creek	CA_Big C_Creek	1
CA_Big C_Creek	CA_Big C_Creek	CA_Big C_Creek	1
CA_Big C_Creek	CA_Big C_Creek	CA_Big C_Creek	1
CA_Big C_Creek	CA_Big C_Creek	CA_Big C_Creek	1
CA_Big C_Creek	CA_Big C_Creek	CA_Big C_Creek	1
CA_Big C_serve	CA_Big C_serve	CA_Big C_serve	28
CA_Big C_serve	CA_Big C_serve	CA_Big C_serve	27
CA_Big C_serve	CA_Big C_serve	CA_Big C_serve	25
CA_Big C_serve	CA_Big C_serve	CA_Big C_serve	19
CA_Big C_serve	CA_Big C_serve	CA_Big C_serve	19
CA_Big C_serve	CA_Big C_serve	CA_Big C_serve	9
CA_Big C_serve	CA_Big C_serve	CA_Big C_serve	9
CA_Big C_serve	CA_Big C_serve	CA_Big C_serve	9
CA_Big C_serve	CA_Big C_serve	CA_Big C_serve	8
CA_Big C_serve	CA_Big C_serve	CA_Big C_serve	7
CA_Big C_serve	CA_Big C_serve	CA_Big C_serve	7
CA_Big C_serve	CA_Big C_serve	CA_Big C_serve	6
CA_Big C_serve	CA_Big C_serve	CA_Big C_serve	6
CA_Big C_serve	CA_Big C_serve	CA_Big C_serve	4
CA_Big C_serve	CA_Big C_serve	CA_Big C_serve	4
CA_Big C_serve	CA_Big C_serve	CA_Big C_serve	3
CA_Big C_serve	CA_Big C_serve	CA_Big C_serve	3
CA_Big C_serve	CA_Big C_serve	CA_Big C_serve	3
CA_Big C_serve	CA_Big C_serve	CA_Big C_serve	2
CA_Big C_serve	CA_Big C_serve	CA_Big C_serve	1
CA_Big C_serve	CA_Big C_serve	CA_Big C_serve	1
CA_Big C_serve	CA_Big C_serve	CA_Big C_serve	1
CA_Big C_serve	CA_Big C_serve	CA_Big C_serve	1
CA_Big C_serve	CA_Big C_serve	CA_Big C_serve	1
CA_Big C_serve	CA_Big C_serve	CA_Big C_serve	1
CA_Cosum_River	CA_Cosum_River	CA_Cosum_River	270
CA_Cosum_River	CA_Cosum_River	CA_Cosum_River	42
CA_Cosum_River	CA_Cosum_River	CA_Cosum_River	40
CA_Cosum_River	CA_Cosum_River	CA_Cosum_River	18
CA_Cosum_River	CA_Cosum_River	CA_Cosum_River	15
CA_Cosum_River	CA_Cosum_River	CA_Cosum_River	12
CA_Cosum_River	CA_Cosum_River	CA_Cosum_River	10
CA_Cosum_River	CA_Cosum_River	CA_Cosum_River	6
CA_Cosum_River	CA_Cosum_River	CA_Cosum_River	5
CA_Cosum_River	CA_Cosum_River	CA_Cosum_River	4
CA_Cosum_River	CA_Cosum_River	CA_Cosum_River	3
CA_Cosum_River	CA_Cosum_River	CA_Cosum_River	1
CA_Cotto_pring	CA_Cotto_pring	CA_Cotto_pring	2389
CA_Cotto_pring	CA_Cotto_pring	CA_Cotto_pring	242
CA_Cotto_pring	CA_Cotto_pring	CA_Cotto_pring	115
CA_Cotto_pring	CA_Cotto_pring	CA_Cotto_pring	54
CA_Cotto_pring	CA_Cotto_pring	CA_Cotto_pring	49
CA_Cotto_pring	CA_Cotto_pring	CA_Cotto_pring	33
CA_Cotto_pring	CA_Cotto_pring	CA_Cotto_pring	26
CA_Cotto_pring	CA_Cotto_pring	CA_Cotto_pring	25
CA_Cotto_pring	CA_Cotto_pring	CA_Cotto_pring	19
CA_Cotto_pring	CA_Cotto_pring	CA_Cotto_pring	19
CA_Cotto_pring	CA_Cotto_pring	CA_Cotto_pring	14
CA_Cotto_pring	CA_Cotto_pring	CA_Cotto_pring	9
CA_Cotto_pring	CA_Cotto_pring	CA_Cotto_pring	9
CA_Cotto_pring	CA_Cotto_pring	CA_Cotto_pring	8
CA_Cotto_pring	CA_Cotto_pring	CA_Cotto_pring	7
CA_Cotto_pring	CA_Cotto_pring	CA_Cotto_pring	6
CA_Cotto_pring	CA_Cotto_pring	CA_Cotto_pring	6
CA_Cotto_pring	CA_Cotto_pring	CA_Cotto_pring	5
CA_Cotto_pring	CA_Cotto_pring	CA_Cotto_pring	4
CA_Cotto_pring	CA_Cotto_pring	CA_Cotto_pring	4
CA_Cotto_pring	CA_Cotto_pring	CA_Cotto_pring	4
CA_Cotto_pring	CA_Cotto_pring	CA_Cotto_pring	3
CA_Cotto_pring	CA_Cotto_pring	CA_Cotto_pring	3
CA_Cotto_pring	CA_Cotto_pring	CA_Cotto_pring	2
CA_Cotto_pring	CA_Cotto_pring	CA_Cotto_pring	2
CA_Cotto_pring	CA_Cotto_pring	CA_Cotto_pring	2
CA_Cotto_pring	CA_Cotto_pring	CA_Cotto_pring	1
CA_Cotto_pring	CA_Cotto_pring	CA_Cotto_pring	1
CA_Cotto_pring	CA_Cotto_pring	CA_Cotto_pring	1
CA_Darde_elles	CA_Darde_elles	CA_Darde_elles	227
CA_Darde_elles	CA_Darde_elles	CA_Darde_elles	107
CA_Darde_elles	CA_Darde_elles	CA_Darde_elles	73
CA_Darde_elles	CA_Darde_elles	CA_Darde_elles	62
CA_Darde_elles	CA_Darde_elles	CA_Darde_elles	57
CA_Darde_elles	CA_Darde_elles	CA_Darde_elles	51
CA_Darde_elles	CA_Darde_elles	CA_Darde_elles	51
CA_Darde_elles	CA_Darde_elles	CA_Darde_elles	45
CA_Darde_elles	CA_Darde_elles	CA_Darde_elles	44
CA_Darde_elles	CA_Darde_elles	CA_Darde_elles	32
CA_Darde_elles	CA_Darde_elles	CA_Darde_elles	30
CA_Darde_elles	CA_Darde_elles	CA_Darde_elles	28
CA_Darde_elles	CA_Darde_elles	CA_Darde_elles	27
CA_Darde_elles	CA_Darde_elles	CA_Darde_elles	25
CA_Darde_elles	CA_Darde_elles	CA_Darde_elles	25
CA_Darde_elles	CA_Darde_elles	CA_Darde_elles	24
CA_Darde_elles	CA_Darde_elles	CA_Darde_elles	23
CA_Darde_elles	CA_Darde_elles	CA_Darde_elles	15
CA_Darde_elles	CA_Darde_elles	CA_Darde_elles	15
CA_Darde_elles	CA_Darde_elles	CA_Darde_elles	15
CA_Darde_elles	CA_Darde_elles	CA_Darde_elles	14
CA_Darde_elles	CA_Darde_elles	CA_Darde_elles	11
CA_Darde_elles	CA_Darde_elles	CA_Darde_elles	11
CA_Darde_elles	CA_Darde_elles	CA_Darde_elles	10
CA_Darde_elles	CA_Darde_elles	CA_Darde_elles	10
CA_Darde_elles	CA_Darde_elles	CA_Darde_elles	10
CA_Darde_elles	CA_Darde_elles	CA_Darde_elles	10
CA_Darde_elles	CA_Darde_elles	CA_Darde_elles	9
CA_Darde_elles	CA_Darde_elles	CA_Darde_elles	9
CA_Darde_elles	CA_Darde_elles	CA_Darde_elles	7
CA_Darde_elles	CA_Darde_elles	CA_Darde_elles	7
CA_Darde_elles	CA_Darde_elles	CA_Darde_elles	7
CA_Darde_elles	CA_Darde_elles	CA_Darde_elles	6
CA_Darde_elles	CA_Darde_elles	CA_Darde_elles	6
CA_Darde_elles	CA_Darde_elles	CA_Darde_elles	5
CA_Darde_elles	CA_Darde_elles	CA_Darde_elles	5
CA_Darde_elles	CA_Darde_elles	CA_Darde_elles	5
CA_Darde_elles	CA_Darde_elles	CA_Darde_elles	5
CA_Darde_elles	CA_Darde_elles	CA_Darde_elles	4
CA_Darde_elles	CA_Darde_elles	CA_Darde_elles	3
CA_Darde_elles	CA_Darde_elles	CA_Darde_elles	3
CA_Darde_elles	CA_Darde_elles	CA_Darde_elles	3
CA_Darde_elles	CA_Darde_elles	CA_Darde_elles	2
CA_Darde_elles	CA_Darde_elles	CA_Darde_elles	2
CA_Darde_elles	CA_Darde_elles	CA_Darde_elles	2
CA_Darde_elles	CA_Darde_elles	CA_Darde_elles	2
CA_Darde_elles	CA_Darde_elles	CA_Darde_elles	2
CA_Darde_elles	CA_Darde_elles	CA_Darde_elles	2
CA_Darde_elles	CA_Darde_elles	CA_Darde_elles	1
CA_Darde_elles	CA_Darde_elles	CA_Darde_elles	1
CA_Darde_elles	CA_Darde_elles	CA_Darde_elles	1
CA_Darde_elles	CA_Darde_elles	CA_Darde_elles	1
CA_Darde_elles	CA_Darde_elles	CA_Darde_elles	1
CA_Darde_elles	CA_Darde_elles	CA_Darde_elles	1
CA_Darde_elles	CA_Darde_elles	CA_Darde_elles	1
CA_Darde_elles	CA_Darde_elles	CA_Darde_elles	1
CA_Darde_elles	CA_Darde_elles	CA_Darde_elles	1
CA_Darde_elles	CA_Darde_elles	CA_Darde_elles	1
CA_Darde_elles	CA_Darde_elles	CA_Darde_elles	1
CA_Darde_elles	CA_Darde_elles	CA_Darde_elles	1
CA_Darde_elles	CA_Darde_elles	CA_Darde_elles	1
CA_Darde_elles	CA_Darde_elles	CA_Darde_elles	1
CA_El Do_enter	CA_El Do_enter	CA_El Do_enter	73
CA_El Do_enter	CA_El Do_enter	CA_El Do_enter	37
CA_El Do_enter	CA_El Do_enter	CA_El Do_enter	26
CA_El Do_enter	CA_El Do_enter	CA_El Do_enter	22
CA_El Do_enter	CA_El Do_enter	CA_El Do_enter	21
CA_El Do_enter	CA_El Do_enter	CA_El Do_enter	15
CA_El Do_enter	CA_El Do_enter	CA_El Do_enter	14
CA_El Do_enter	CA_El Do_enter	CA_El Do_enter	11
CA_El Do_enter	CA_El Do_enter	CA_El Do_enter	9
CA_El Do_enter	CA_El Do_enter	CA_El Do_enter	6
CA_El Do_enter	CA_El Do_enter	CA_El Do_enter	4
CA_El Do_enter	CA_El Do_enter	CA_El Do_enter	3
CA_El Do_enter	CA_El Do_enter	CA_El Do_enter	2
CA_El Do_enter	CA_El Do_enter	CA_El Do_enter	1
CA_El Do_enter	CA_El Do_enter	CA_El Do_enter	1
CA_El Do_enter	CA_El Do_enter	CA_El Do_enter	1
CA_El Do_enter	CA_El Do_enter	CA_El Do_enter	1
CA_Hasti_ation	CA_Hasti_ation	CA_Hasti_ation	359
CA_Hasti_ation	CA_Hasti_ation	CA_Hasti_ation	74
CA_Hasti_ation	CA_Hasti_ation	CA_Hasti_ation	73
CA_Hasti_ation	CA_Hasti_ation	CA_Hasti_ation	71
CA_Hasti_ation	CA_Hasti_ation	CA_Hasti_ation	65
CA_Hasti_ation	CA_Hasti_ation	CA_Hasti_ation	54
CA_Hasti_ation	CA_Hasti_ation	CA_Hasti_ation	34
CA_Hasti_ation	CA_Hasti_ation	CA_Hasti_ation	33
CA_Hasti_ation	CA_Hasti_ation	CA_Hasti_ation	27
CA_Hasti_ation	CA_Hasti_ation	CA_Hasti_ation	25
CA_Hasti_ation	CA_Hasti_ation	CA_Hasti_ation	25
CA_Hasti_ation	CA_Hasti_ation	CA_Hasti_ation	23
CA_Hasti_ation	CA_Hasti_ation	CA_Hasti_ation	22
CA_Hasti_ation	CA_Hasti_ation	CA_Hasti_ation	21
CA_Hasti_ation	CA_Hasti_ation	CA_Hasti_ation	18
CA_Hasti_ation	CA_Hasti_ation	CA_Hasti_ation	17
CA_Hasti_ation	CA_Hasti_ation	CA_Hasti_ation	15
CA_Hasti_ation	CA_Hasti_ation	CA_Hasti_ation	15
CA_Hasti_ation	CA_Hasti_ation	CA_Hasti_ation	15
CA_Hasti_ation	CA_Hasti_ation	CA_Hasti_ation	15
CA_Hasti_ation	CA_Hasti_ation	CA_Hasti_ation	14
CA_Hasti_ation	CA_Hasti_ation	CA_Hasti_ation	12
CA_Hasti_ation	CA_Hasti_ation	CA_Hasti_ation	12
CA_Hasti_ation	CA_Hasti_ation	CA_Hasti_ation	11
CA_Hasti_ation	CA_Hasti_ation	CA_Hasti_ation	11
CA_Hasti_ation	CA_Hasti_ation	CA_Hasti_ation	9
CA_Hasti_ation	CA_Hasti_ation	CA_Hasti_ation	9
CA_Hasti_ation	CA_Hasti_ation	CA_Hasti_ation	9
CA_Hasti_ation	CA_Hasti_ation	CA_Hasti_ation	8
CA_Hasti_ation	CA_Hasti_ation	CA_Hasti_ation	8
CA_Hasti_ation	CA_Hasti_ation	CA_Hasti_ation	6
CA_Hasti_ation	CA_Hasti_ation	CA_Hasti_ation	4
CA_Hasti_ation	CA_Hasti_ation	CA_Hasti_ation	3
CA_Hasti_ation	CA_Hasti_ation	CA_Hasti_ation	2
CA_Hasti_ation	CA_Hasti_ation	CA_Hasti_ation	2
CA_Hasti_ation	CA_Hasti_ation	CA_Hasti_ation	2
CA_Hasti_ation	CA_Hasti_ation	CA_Hasti_ation	2
CA_Hasti_ation	CA_Hasti_ation	CA_Hasti_ation	2
CA_Hasti_ation	CA_Hasti_ation	CA_Hasti_ation	1
CA_Hasti_ation	CA_Hasti_ation	CA_Hasti_ation	1
CA_Hasti_ation	CA_Hasti_ation	CA_Hasti_ation	1
CA_Hasti_ation	CA_Hasti_ation	CA_Hasti_ation	1
CA_Hasti_ation	CA_Hasti_ation	CA_Hasti_ation	1
CA_Hasti_ation	CA_Hasti_ation	CA_Hasti_ation	1
CA_Hasti_ation	CA_Hasti_ation	CA_Hasti_ation	1
CA_Joshu_ Tree	CA_Joshu_ Tree	CA_Joshu_ Tree	87
CA_Joshu_ Tree	CA_Joshu_ Tree	CA_Joshu_ Tree	81
CA_Joshu_ Tree	CA_Joshu_ Tree	CA_Joshu_ Tree	57
CA_Joshu_ Tree	CA_Joshu_ Tree	CA_Joshu_ Tree	34
CA_Joshu_ Tree	CA_Joshu_ Tree	CA_Joshu_ Tree	30
CA_Joshu_ Tree	CA_Joshu_ Tree	CA_Joshu_ Tree	30
CA_Joshu_ Tree	CA_Joshu_ Tree	CA_Joshu_ Tree	21
CA_Joshu_ Tree	CA_Joshu_ Tree	CA_Joshu_ Tree	17
CA_Joshu_ Tree	CA_Joshu_ Tree	CA_Joshu_ Tree	11
CA_Joshu_ Tree	CA_Joshu_ Tree	CA_Joshu_ Tree	11
CA_Joshu_ Tree	CA_Joshu_ Tree	CA_Joshu_ Tree	9
CA_Joshu_ Tree	CA_Joshu_ Tree	CA_Joshu_ Tree	7
CA_Joshu_ Tree	CA_Joshu_ Tree	CA_Joshu_ Tree	6
CA_Joshu_ Tree	CA_Joshu_ Tree	CA_Joshu_ Tree	5
CA_Joshu_ Tree	CA_Joshu_ Tree	CA_Joshu_ Tree	5
CA_Joshu_ Tree	CA_Joshu_ Tree	CA_Joshu_ Tree	5
CA_Joshu_ Tree	CA_Joshu_ Tree	CA_Joshu_ Tree	4
CA_Joshu_ Tree	CA_Joshu_ Tree	CA_Joshu_ Tree	4
CA_Joshu_ Tree	CA_Joshu_ Tree	CA_Joshu_ Tree	4
CA_Joshu_ Tree	CA_Joshu_ Tree	CA_Joshu_ Tree	4
CA_Joshu_ Tree	CA_Joshu_ Tree	CA_Joshu_ Tree	4
CA_Joshu_ Tree	CA_Joshu_ Tree	CA_Joshu_ Tree	3
CA_Joshu_ Tree	CA_Joshu_ Tree	CA_Joshu_ Tree	3
CA_Joshu_ Tree	CA_Joshu_ Tree	CA_Joshu_ Tree	3
CA_Joshu_ Tree	CA_Joshu_ Tree	CA_Joshu_ Tree	2
CA_Joshu_ Tree	CA_Joshu_ Tree	CA_Joshu_ Tree	2
CA_Joshu_ Tree	CA_Joshu_ Tree	CA_Joshu_ Tree	2
CA_Joshu_ Tree	CA_Joshu_ Tree	CA_Joshu_ Tree	1
CA_Joshu_ Tree	CA_Joshu_ Tree	CA_Joshu_ Tree	1
CA_Joshu_ Tree	CA_Joshu_ Tree	CA_Joshu_ Tree	1
CA_Joshu_ Tree	CA_Joshu_ Tree	CA_Joshu_ Tree	1
CA_Joshu_ Tree	CA_Joshu_ Tree	CA_Joshu_ Tree	1
CA_Joshu_ Tree	CA_Joshu_ Tree	CA_Joshu_ Tree	1
CA_Joshu_ Tree	CA_Joshu_ Tree	CA_Joshu_ Tree	1
CA_Joshu_ Tree	CA_Joshu_ Tree	CA_Joshu_ Tree	1
CA_Joshu_ Tree	CA_Joshu_ Tree	CA_Joshu_ Tree	1
CA_Joshu_ Tree	CA_Joshu_ Tree	CA_Joshu_ Tree	1
CA_Joshu_ Tree	CA_Joshu_ Tree	CA_Joshu_ Tree	1
CA_Lava _ument	CA_Lava _ument	CA_Lava _ument	249
CA_Lava _ument	CA_Lava _ument	CA_Lava _ument	210
CA_Lava _ument	CA_Lava _ument	CA_Lava _ument	155
CA_Lava _ument	CA_Lava _ument	CA_Lava _ument	133
CA_Lava _ument	CA_Lava _ument	CA_Lava _ument	129
CA_Lava _ument	CA_Lava _ument	CA_Lava _ument	103
CA_Lava _ument	CA_Lava _ument	CA_Lava _ument	75
CA_Lava _ument	CA_Lava _ument	CA_Lava _ument	68
CA_Lava _ument	CA_Lava _ument	CA_Lava _ument	59
CA_Lava _ument	CA_Lava _ument	CA_Lava _ument	57
CA_Lava _ument	CA_Lava _ument	CA_Lava _ument	57
CA_Lava _ument	CA_Lava _ument	CA_Lava _ument	52
CA_Lava _ument	CA_Lava _ument	CA_Lava _ument	52
CA_Lava _ument	CA_Lava _ument	CA_Lava _ument	46
CA_Lava _ument	CA_Lava _ument	CA_Lava _ument	34
CA_Lava _ument	CA_Lava _ument	CA_Lava _ument	19
CA_Lava _ument	CA_Lava _ument	CA_Lava _ument	11
CA_Lava _ument	CA_Lava _ument	CA_Lava _ument	11
CA_Lava _ument	CA_Lava _ument	CA_Lava _ument	11
CA_Lava _ument	CA_Lava _ument	CA_Lava _ument	11
CA_Lava _ument	CA_Lava _ument	CA_Lava _ument	10
CA_Lava _ument	CA_Lava _ument	CA_Lava _ument	9
CA_Lava _ument	CA_Lava _ument	CA_Lava _ument	9
CA_Lava _ument	CA_Lava _ument	CA_Lava _ument	9
CA_Lava _ument	CA_Lava _ument	CA_Lava _ument	7
CA_Lava _ument	CA_Lava _ument	CA_Lava _ument	7
CA_Lava _ument	CA_Lava _ument	CA_Lava _ument	6
CA_Lava _ument	CA_Lava _ument	CA_Lava _ument	6
CA_Lava _ument	CA_Lava _ument	CA_Lava _ument	6
CA_Lava _ument	CA_Lava _ument	CA_Lava _ument	6
CA_Lava _ument	CA_Lava _ument	CA_Lava _ument	5
CA_Lava _ument	CA_Lava _ument	CA_Lava _ument	5
CA_Lava _ument	CA_Lava _ument	CA_Lava _ument	5
CA_Lava _ument	CA_Lava _ument	CA_Lava _ument	4
CA_Lava _ument	CA_Lava _ument	CA_Lava _ument	4
CA_Lava _ument	CA_Lava _ument	CA_Lava _ument	2
CA_Lava _ument	CA_Lava _ument	CA_Lava _ument	2
CA_Lava _ument	CA_Lava _ument	CA_Lava _ument	2
CA_Lava _ument	CA_Lava _ument	CA_Lava _ument	2
CA_Lava _ument	CA_Lava _ument	CA_Lava _ument	2
CA_Lava _ument	CA_Lava _ument	CA_Lava _ument	1
CA_Lava _ument	CA_Lava _ument	CA_Lava _ument	1
CA_Lava _ument	CA_Lava _ument	CA_Lava _ument	1
CA_Lava _ument	CA_Lava _ument	CA_Lava _ument	1
CA_Lava _ument	CA_Lava _ument	CA_Lava _ument	1
CA_Lava _ument	CA_Lava _ument	CA_Lava _ument	1
CA_Lava _ument	CA_Lava _ument	CA_Lava _ument	1
CA_Lava _ument	CA_Lava _ument	CA_Lava _ument	1
CA_Lava _ument	CA_Lava _ument	CA_Lava _ument	1
CA_Marin_n Co.	CA_Marin_n Co.	CA_Marin_n Co.	93
CA_Marin_n Co.	CA_Marin_n Co.	CA_Marin_n Co.	59
CA_Marin_n Co.	CA_Marin_n Co.	CA_Marin_n Co.	56
CA_Marin_n Co.	CA_Marin_n Co.	CA_Marin_n Co.	55
CA_Marin_n Co.	CA_Marin_n Co.	CA_Marin_n Co.	39
CA_Marin_n Co.	CA_Marin_n Co.	CA_Marin_n Co.	24
CA_Marin_n Co.	CA_Marin_n Co.	CA_Marin_n Co.	19
CA_Marin_n Co.	CA_Marin_n Co.	CA_Marin_n Co.	15
CA_Marin_n Co.	CA_Marin_n Co.	CA_Marin_n Co.	14
CA_Marin_n Co.	CA_Marin_n Co.	CA_Marin_n Co.	7
CA_Marin_n Co.	CA_Marin_n Co.	CA_Marin_n Co.	7
CA_Marin_n Co.	CA_Marin_n Co.	CA_Marin_n Co.	6
CA_Marin_n Co.	CA_Marin_n Co.	CA_Marin_n Co.	6
CA_Marin_n Co.	CA_Marin_n Co.	CA_Marin_n Co.	6
CA_Marin_n Co.	CA_Marin_n Co.	CA_Marin_n Co.	6
CA_Marin_n Co.	CA_Marin_n Co.	CA_Marin_n Co.	6
CA_Marin_n Co.	CA_Marin_n Co.	CA_Marin_n Co.	5
CA_Marin_n Co.	CA_Marin_n Co.	CA_Marin_n Co.	5
CA_Marin_n Co.	CA_Marin_n Co.	CA_Marin_n Co.	5
CA_Marin_n Co.	CA_Marin_n Co.	CA_Marin_n Co.	5
CA_Marin_n Co.	CA_Marin_n Co.	CA_Marin_n Co.	4
CA_Marin_n Co.	CA_Marin_n Co.	CA_Marin_n Co.	3
CA_Marin_n Co.	CA_Marin_n Co.	CA_Marin_n Co.	3
CA_Marin_n Co.	CA_Marin_n Co.	CA_Marin_n Co.	3
CA_Marin_n Co.	CA_Marin_n Co.	CA_Marin_n Co.	3
CA_Marin_n Co.	CA_Marin_n Co.	CA_Marin_n Co.	2
CA_Marin_n Co.	CA_Marin_n Co.	CA_Marin_n Co.	1
CA_Marin_n Co.	CA_Marin_n Co.	CA_Marin_n Co.	1
CA_Marin_n Co.	CA_Marin_n Co.	CA_Marin_n Co.	1
CA_Marin_n Co.	CA_Marin_n Co.	CA_Marin_n Co.	1
CA_Marin_n Co.	CA_Marin_n Co.	CA_Marin_n Co.	1
CA_Marin_n Co.	CA_Marin_n Co.	CA_Marin_n Co.	1
CA_Marin_n Co.	CA_Marin_n Co.	CA_Marin_n Co.	1
CA_Monte_terey	CA_Monte_terey	CA_Monte_terey	68
CA_Monte_terey	CA_Monte_terey	CA_Monte_terey	51
CA_Monte_terey	CA_Monte_terey	CA_Monte_terey	46
CA_Monte_terey	CA_Monte_terey	CA_Monte_terey	32
CA_Monte_terey	CA_Monte_terey	CA_Monte_terey	31
CA_Monte_terey	CA_Monte_terey	CA_Monte_terey	29
CA_Monte_terey	CA_Monte_terey	CA_Monte_terey	23
CA_Monte_terey	CA_Monte_terey	CA_Monte_terey	22
CA_Monte_terey	CA_Monte_terey	CA_Monte_terey	22
CA_Monte_terey	CA_Monte_terey	CA_Monte_terey	16
CA_Monte_terey	CA_Monte_terey	CA_Monte_terey	15
CA_Monte_terey	CA_Monte_terey	CA_Monte_terey	13
CA_Monte_terey	CA_Monte_terey	CA_Monte_terey	12
CA_Monte_terey	CA_Monte_terey	CA_Monte_terey	10
CA_Monte_terey	CA_Monte_terey	CA_Monte_terey	9
CA_Monte_terey	CA_Monte_terey	CA_Monte_terey	9
CA_Monte_terey	CA_Monte_terey	CA_Monte_terey	7
CA_Monte_terey	CA_Monte_terey	CA_Monte_terey	7
CA_Monte_terey	CA_Monte_terey	CA_Monte_terey	7
CA_Monte_terey	CA_Monte_terey	CA_Monte_terey	7
CA_Monte_terey	CA_Monte_terey	CA_Monte_terey	6
CA_Monte_terey	CA_Monte_terey	CA_Monte_terey	5
CA_Monte_terey	CA_Monte_terey	CA_Monte_terey	5
CA_Monte_terey	CA_Monte_terey	CA_Monte_terey	4
CA_Monte_terey	CA_Monte_terey	CA_Monte_terey	4
CA_Monte_terey	CA_Monte_terey	CA_Monte_terey	3
CA_Monte_terey	CA_Monte_terey	CA_Monte_terey	3
CA_Monte_terey	CA_Monte_terey	CA_Monte_terey	2
CA_Monte_terey	CA_Monte_terey	CA_Monte_terey	2
CA_Monte_terey	CA_Monte_terey	CA_Monte_terey	2
CA_Monte_terey	CA_Monte_terey	CA_Monte_terey	1
CA_Monte_terey	CA_Monte_terey	CA_Monte_terey	1
CA_Monte_terey	CA_Monte_terey	CA_Monte_terey	1
CA_Monte_terey	CA_Monte_terey	CA_Monte_terey	1
CA_Monte_terey	CA_Monte_terey	CA_Monte_terey	1
CA_Monte_terey	CA_Monte_terey	CA_Monte_terey	1
CA_Mount_assen	CA_Mount_assen	CA_Mount_assen	617
CA_Mount_assen	CA_Mount_assen	CA_Mount_assen	159
CA_Mount_assen	CA_Mount_assen	CA_Mount_assen	155
CA_Mount_assen	CA_Mount_assen	CA_Mount_assen	115
CA_Mount_assen	CA_Mount_assen	CA_Mount_assen	100
CA_Mount_assen	CA_Mount_assen	CA_Mount_assen	94
CA_Mount_assen	CA_Mount_assen	CA_Mount_assen	58
CA_Mount_assen	CA_Mount_assen	CA_Mount_assen	51
CA_Mount_assen	CA_Mount_assen	CA_Mount_assen	40
CA_Mount_assen	CA_Mount_assen	CA_Mount_assen	29
CA_Mount_assen	CA_Mount_assen	CA_Mount_assen	28
CA_Mount_assen	CA_Mount_assen	CA_Mount_assen	26
CA_Mount_assen	CA_Mount_assen	CA_Mount_assen	25
CA_Mount_assen	CA_Mount_assen	CA_Mount_assen	23
CA_Mount_assen	CA_Mount_assen	CA_Mount_assen	20
CA_Mount_assen	CA_Mount_assen	CA_Mount_assen	19
CA_Mount_assen	CA_Mount_assen	CA_Mount_assen	19
CA_Mount_assen	CA_Mount_assen	CA_Mount_assen	16
CA_Mount_assen	CA_Mount_assen	CA_Mount_assen	15
CA_Mount_assen	CA_Mount_assen	CA_Mount_assen	15
CA_Mount_assen	CA_Mount_assen	CA_Mount_assen	13
CA_Mount_assen	CA_Mount_assen	CA_Mount_assen	11
CA_Mount_assen	CA_Mount_assen	CA_Mount_assen	11
CA_Mount_assen	CA_Mount_assen	CA_Mount_assen	10
CA_Mount_assen	CA_Mount_assen	CA_Mount_assen	9
CA_Mount_assen	CA_Mount_assen	CA_Mount_assen	8
CA_Mount_assen	CA_Mount_assen	CA_Mount_assen	8
CA_Mount_assen	CA_Mount_assen	CA_Mount_assen	7
CA_Mount_assen	CA_Mount_assen	CA_Mount_assen	7
CA_Mount_assen	CA_Mount_assen	CA_Mount_assen	6
CA_Mount_assen	CA_Mount_assen	CA_Mount_assen	6
CA_Mount_assen	CA_Mount_assen	CA_Mount_assen	5
CA_Mount_assen	CA_Mount_assen	CA_Mount_assen	5
CA_Mount_assen	CA_Mount_assen	CA_Mount_assen	5
CA_Mount_assen	CA_Mount_assen	CA_Mount_assen	4
CA_Mount_assen	CA_Mount_assen	CA_Mount_assen	4
CA_Mount_assen	CA_Mount_assen	CA_Mount_assen	4
CA_Mount_assen	CA_Mount_assen	CA_Mount_assen	4
CA_Mount_assen	CA_Mount_assen	CA_Mount_assen	4
CA_Mount_assen	CA_Mount_assen	CA_Mount_assen	3
CA_Mount_assen	CA_Mount_assen	CA_Mount_assen	2
CA_Mount_assen	CA_Mount_assen	CA_Mount_assen	2
CA_Mount_assen	CA_Mount_assen	CA_Mount_assen	2
CA_Mount_assen	CA_Mount_assen	CA_Mount_assen	2
CA_Mount_assen	CA_Mount_assen	CA_Mount_assen	2
CA_Mount_assen	CA_Mount_assen	CA_Mount_assen	2
CA_Mount_assen	CA_Mount_assen	CA_Mount_assen	2
CA_Mount_assen	CA_Mount_assen	CA_Mount_assen	2
CA_Mount_assen	CA_Mount_assen	CA_Mount_assen	2
CA_Mount_assen	CA_Mount_assen	CA_Mount_assen	2
CA_Mount_assen	CA_Mount_assen	CA_Mount_assen	1
CA_Mount_assen	CA_Mount_assen	CA_Mount_assen	1
CA_Mount_assen	CA_Mount_assen	CA_Mount_assen	1
CA_Mount_assen	CA_Mount_assen	CA_Mount_assen	1
CA_Mount_assen	CA_Mount_assen	CA_Mount_assen	1
CA_Mount_assen	CA_Mount_assen	CA_Mount_assen	1
CA_Mount_assen	CA_Mount_assen	CA_Mount_assen	1
CA_Mount_assen	CA_Mount_assen	CA_Mount_assen	1
CA_Mount_assen	CA_Mount_assen	CA_Mount_assen	1
CA_Mount_assen	CA_Mount_assen	CA_Mount_assen	1
CA_Mount_iablo	CA_Mount_iablo	CA_Mount_iablo	345
CA_Mount_iablo	CA_Mount_iablo	CA_Mount_iablo	215
CA_Mount_iablo	CA_Mount_iablo	CA_Mount_iablo	74
CA_Mount_iablo	CA_Mount_iablo	CA_Mount_iablo	65
CA_Mount_iablo	CA_Mount_iablo	CA_Mount_iablo	63
CA_Mount_iablo	CA_Mount_iablo	CA_Mount_iablo	60
CA_Mount_iablo	CA_Mount_iablo	CA_Mount_iablo	42
CA_Mount_iablo	CA_Mount_iablo	CA_Mount_iablo	33
CA_Mount_iablo	CA_Mount_iablo	CA_Mount_iablo	28
CA_Mount_iablo	CA_Mount_iablo	CA_Mount_iablo	28
CA_Mount_iablo	CA_Mount_iablo	CA_Mount_iablo	26
CA_Mount_iablo	CA_Mount_iablo	CA_Mount_iablo	18
CA_Mount_iablo	CA_Mount_iablo	CA_Mount_iablo	18
CA_Mount_iablo	CA_Mount_iablo	CA_Mount_iablo	16
CA_Mount_iablo	CA_Mount_iablo	CA_Mount_iablo	15
CA_Mount_iablo	CA_Mount_iablo	CA_Mount_iablo	15
CA_Mount_iablo	CA_Mount_iablo	CA_Mount_iablo	13
CA_Mount_iablo	CA_Mount_iablo	CA_Mount_iablo	10
CA_Mount_iablo	CA_Mount_iablo	CA_Mount_iablo	8
CA_Mount_iablo	CA_Mount_iablo	CA_Mount_iablo	7
CA_Mount_iablo	CA_Mount_iablo	CA_Mount_iablo	6
CA_Mount_iablo	CA_Mount_iablo	CA_Mount_iablo	5
CA_Mount_iablo	CA_Mount_iablo	CA_Mount_iablo	4
CA_Mount_iablo	CA_Mount_iablo	CA_Mount_iablo	4
CA_Mount_iablo	CA_Mount_iablo	CA_Mount_iablo	3
CA_Mount_iablo	CA_Mount_iablo	CA_Mount_iablo	3
CA_Mount_iablo	CA_Mount_iablo	CA_Mount_iablo	2
CA_Mount_iablo	CA_Mount_iablo	CA_Mount_iablo	2
CA_Mount_iablo	CA_Mount_iablo	CA_Mount_iablo	2
CA_Mount_iablo	CA_Mount_iablo	CA_Mount_iablo	2
CA_Mount_iablo	CA_Mount_iablo	CA_Mount_iablo	1
CA_Mount_iablo	CA_Mount_iablo	CA_Mount_iablo	1
CA_Mount_iablo	CA_Mount_iablo	CA_Mount_iablo	1
CA_Mount_iablo	CA_Mount_iablo	CA_Mount_iablo	1
CA_O'Nei_ Park	CA_O'Nei_ Park	CA_O'Nei_ Park	34
CA_O'Nei_ Park	CA_O'Nei_ Park	CA_O'Nei_ Park	10
CA_O'Nei_ Park	CA_O'Nei_ Park	CA_O'Nei_ Park	6
CA_O'Nei_ Park	CA_O'Nei_ Park	CA_O'Nei_ Park	5
CA_O'Nei_ Park	CA_O'Nei_ Park	CA_O'Nei_ Park	4
CA_O'Nei_ Park	CA_O'Nei_ Park	CA_O'Nei_ Park	4
CA_O'Nei_ Park	CA_O'Nei_ Park	CA_O'Nei_ Park	3
CA_O'Nei_ Park	CA_O'Nei_ Park	CA_O'Nei_ Park	2
CA_O'Nei_ Park	CA_O'Nei_ Park	CA_O'Nei_ Park	2
CA_O'Nei_ Park	CA_O'Nei_ Park	CA_O'Nei_ Park	2
CA_O'Nei_ Park	CA_O'Nei_ Park	CA_O'Nei_ Park	1
CA_O'Nei_ Park	CA_O'Nei_ Park	CA_O'Nei_ Park	1
CA_O'Nei_ Park	CA_O'Nei_ Park	CA_O'Nei_ Park	1
CA_O'Nei_ Park	CA_O'Nei_ Park	CA_O'Nei_ Park	1
CA_O'Nei_ Park	CA_O'Nei_ Park	CA_O'Nei_ Park	1
CA_O'Nei_ Park	CA_O'Nei_ Park	CA_O'Nei_ Park	1
CA_O'Nei_ Park	CA_O'Nei_ Park	CA_O'Nei_ Park	1
CA_O'Nei_ Park	CA_O'Nei_ Park	CA_O'Nei_ Park	1
CA_Palos_erdes	CA_Palos_erdes	CA_Palos_erdes	308
CA_Palos_erdes	CA_Palos_erdes	CA_Palos_erdes	178
CA_Palos_erdes	CA_Palos_erdes	CA_Palos_erdes	142
CA_Palos_erdes	CA_Palos_erdes	CA_Palos_erdes	122
CA_Palos_erdes	CA_Palos_erdes	CA_Palos_erdes	71
CA_Palos_erdes	CA_Palos_erdes	CA_Palos_erdes	69
CA_Palos_erdes	CA_Palos_erdes	CA_Palos_erdes	69
CA_Palos_erdes	CA_Palos_erdes	CA_Palos_erdes	50
CA_Palos_erdes	CA_Palos_erdes	CA_Palos_erdes	50
CA_Palos_erdes	CA_Palos_erdes	CA_Palos_erdes	47
CA_Palos_erdes	CA_Palos_erdes	CA_Palos_erdes	32
CA_Palos_erdes	CA_Palos_erdes	CA_Palos_erdes	31
CA_Palos_erdes	CA_Palos_erdes	CA_Palos_erdes	30
CA_Palos_erdes	CA_Palos_erdes	CA_Palos_erdes	30
CA_Palos_erdes	CA_Palos_erdes	CA_Palos_erdes	25
CA_Palos_erdes	CA_Palos_erdes	CA_Palos_erdes	13
CA_Palos_erdes	CA_Palos_erdes	CA_Palos_erdes	12
CA_Palos_erdes	CA_Palos_erdes	CA_Palos_erdes	11
CA_Palos_erdes	CA_Palos_erdes	CA_Palos_erdes	9
CA_Palos_erdes	CA_Palos_erdes	CA_Palos_erdes	8
CA_Palos_erdes	CA_Palos_erdes	CA_Palos_erdes	7
CA_Palos_erdes	CA_Palos_erdes	CA_Palos_erdes	6
CA_Palos_erdes	CA_Palos_erdes	CA_Palos_erdes	5
CA_Palos_erdes	CA_Palos_erdes	CA_Palos_erdes	4
CA_Palos_erdes	CA_Palos_erdes	CA_Palos_erdes	4
CA_Palos_erdes	CA_Palos_erdes	CA_Palos_erdes	3
CA_Palos_erdes	CA_Palos_erdes	CA_Palos_erdes	2
CA_Palos_erdes	CA_Palos_erdes	CA_Palos_erdes	2
CA_Pasad_adena	CA_Pasad_adena	CA_Pasad_adena	705
CA_Pasad_adena	CA_Pasad_adena	CA_Pasad_adena	39
CA_Pasad_adena	CA_Pasad_adena	CA_Pasad_adena	28
CA_Pasad_adena	CA_Pasad_adena	CA_Pasad_adena	22
CA_Pasad_adena	CA_Pasad_adena	CA_Pasad_adena	15
CA_Pasad_adena	CA_Pasad_adena	CA_Pasad_adena	11
CA_Pasad_adena	CA_Pasad_adena	CA_Pasad_adena	8
CA_Pasad_adena	CA_Pasad_adena	CA_Pasad_adena	8
CA_Pasad_adena	CA_Pasad_adena	CA_Pasad_adena	6
CA_Pasad_adena	CA_Pasad_adena	CA_Pasad_adena	6
CA_Pasad_adena	CA_Pasad_adena	CA_Pasad_adena	5
CA_Pasad_adena	CA_Pasad_adena	CA_Pasad_adena	4
CA_Pasad_adena	CA_Pasad_adena	CA_Pasad_adena	2
CA_Pasad_adena	CA_Pasad_adena	CA_Pasad_adena	2
CA_Pasad_adena	CA_Pasad_adena	CA_Pasad_adena	2
CA_Pasad_adena	CA_Pasad_adena	CA_Pasad_adena	2
CA_Pasad_adena	CA_Pasad_adena	CA_Pasad_adena	1
CA_Pasad_adena	CA_Pasad_adena	CA_Pasad_adena	1
CA_Pasad_adena	CA_Pasad_adena	CA_Pasad_adena	1
CA_Pasad_adena	CA_Pasad_adena	CA_Pasad_adena	1
CA_Pasad_adena	CA_Pasad_adena	CA_Pasad_adena	1
CA_Pasad_adena	CA_Pasad_adena	CA_Pasad_adena	1
CA_Pasad_adena	CA_Pasad_adena	CA_Pasad_adena	1
CA_Pasad_adena	CA_Pasad_adena	CA_Pasad_adena	1
CA_Pinna_ument	CA_Pinna_ument	CA_Pinna_ument	591
CA_Pinna_ument	CA_Pinna_ument	CA_Pinna_ument	400
CA_Pinna_ument	CA_Pinna_ument	CA_Pinna_ument	257
CA_Pinna_ument	CA_Pinna_ument	CA_Pinna_ument	137
CA_Pinna_ument	CA_Pinna_ument	CA_Pinna_ument	124
CA_Pinna_ument	CA_Pinna_ument	CA_Pinna_ument	111
CA_Pinna_ument	CA_Pinna_ument	CA_Pinna_ument	68
CA_Pinna_ument	CA_Pinna_ument	CA_Pinna_ument	51
CA_Pinna_ument	CA_Pinna_ument	CA_Pinna_ument	49
CA_Pinna_ument	CA_Pinna_ument	CA_Pinna_ument	46
CA_Pinna_ument	CA_Pinna_ument	CA_Pinna_ument	45
CA_Pinna_ument	CA_Pinna_ument	CA_Pinna_ument	38
CA_Pinna_ument	CA_Pinna_ument	CA_Pinna_ument	23
CA_Pinna_ument	CA_Pinna_ument	CA_Pinna_ument	21
CA_Pinna_ument	CA_Pinna_ument	CA_Pinna_ument	19
CA_Pinna_ument	CA_Pinna_ument	CA_Pinna_ument	14
CA_Pinna_ument	CA_Pinna_ument	CA_Pinna_ument	13
CA_Pinna_ument	CA_Pinna_ument	CA_Pinna_ument	12
CA_Pinna_ument	CA_Pinna_ument	CA_Pinna_ument	12
CA_Pinna_ument	CA_Pinna_ument	CA_Pinna_ument	11
CA_Pinna_ument	CA_Pinna_ument	CA_Pinna_ument	11
CA_Pinna_ument	CA_Pinna_ument	CA_Pinna_ument	10
CA_Pinna_ument	CA_Pinna_ument	CA_Pinna_ument	10
CA_Pinna_ument	CA_Pinna_ument	CA_Pinna_ument	9
CA_Pinna_ument	CA_Pinna_ument	CA_Pinna_ument	9
CA_Pinna_ument	CA_Pinna_ument	CA_Pinna_ument	8
CA_Pinna_ument	CA_Pinna_ument	CA_Pinna_ument	7
CA_Pinna_ument	CA_Pinna_ument	CA_Pinna_ument	7
CA_Pinna_ument	CA_Pinna_ument	CA_Pinna_ument	7
CA_Pinna_ument	CA_Pinna_ument	CA_Pinna_ument	6
CA_Pinna_ument	CA_Pinna_ument	CA_Pinna_ument	3
CA_Pinna_ument	CA_Pinna_ument	CA_Pinna_ument	3
CA_Pinna_ument	CA_Pinna_ument	CA_Pinna_ument	3
CA_Pinna_ument	CA_Pinna_ument	CA_Pinna_ument	2
CA_Pinna_ument	CA_Pinna_ument	CA_Pinna_ument	2
CA_Pinna_ument	CA_Pinna_ument	CA_Pinna_ument	1
CA_Pinna_ument	CA_Pinna_ument	CA_Pinna_ument	1
CA_Pinna_ument	CA_Pinna_ument	CA_Pinna_ument	1
CA_Pinna_ument	CA_Pinna_ument	CA_Pinna_ument	1
CA_Pinna_ument	CA_Pinna_ument	CA_Pinna_ument	1
CA_Pinna_ument	CA_Pinna_ument	CA_Pinna_ument	1
CA_Pinna_ument	CA_Pinna_ument	CA_Pinna_ument	1
CA_Point_Reyes	CA_Point_Reyes	CA_Point_Reyes	53
CA_Point_Reyes	CA_Point_Reyes	CA_Point_Reyes	41
CA_Point_Reyes	CA_Point_Reyes	CA_Point_Reyes	32
CA_Point_Reyes	CA_Point_Reyes	CA_Point_Reyes	31
CA_Point_Reyes	CA_Point_Reyes	CA_Point_Reyes	28
CA_Point_Reyes	CA_Point_Reyes	CA_Point_Reyes	21
CA_Point_Reyes	CA_Point_Reyes	CA_Point_Reyes	20
CA_Point_Reyes	CA_Point_Reyes	CA_Point_Reyes	18
CA_Point_Reyes	CA_Point_Reyes	CA_Point_Reyes	15
CA_Point_Reyes	CA_Point_Reyes	CA_Point_Reyes	13
CA_Point_Reyes	CA_Point_Reyes	CA_Point_Reyes	13
CA_Point_Reyes	CA_Point_Reyes	CA_Point_Reyes	11
CA_Point_Reyes	CA_Point_Reyes	CA_Point_Reyes	10
CA_Point_Reyes	CA_Point_Reyes	CA_Point_Reyes	8
CA_Point_Reyes	CA_Point_Reyes	CA_Point_Reyes	8
CA_Point_Reyes	CA_Point_Reyes	CA_Point_Reyes	7
CA_Point_Reyes	CA_Point_Reyes	CA_Point_Reyes	6
CA_Point_Reyes	CA_Point_Reyes	CA_Point_Reyes	5
CA_Point_Reyes	CA_Point_Reyes	CA_Point_Reyes	4
CA_Point_Reyes	CA_Point_Reyes	CA_Point_Reyes	4
CA_Point_Reyes	CA_Point_Reyes	CA_Point_Reyes	4
CA_Point_Reyes	CA_Point_Reyes	CA_Point_Reyes	3
CA_Point_Reyes	CA_Point_Reyes	CA_Point_Reyes	3
CA_Point_Reyes	CA_Point_Reyes	CA_Point_Reyes	3
CA_Point_Reyes	CA_Point_Reyes	CA_Point_Reyes	3
CA_Point_Reyes	CA_Point_Reyes	CA_Point_Reyes	3
CA_Point_Reyes	CA_Point_Reyes	CA_Point_Reyes	3
CA_Point_Reyes	CA_Point_Reyes	CA_Point_Reyes	2
CA_Point_Reyes	CA_Point_Reyes	CA_Point_Reyes	2
CA_Point_Reyes	CA_Point_Reyes	CA_Point_Reyes	2
CA_Point_Reyes	CA_Point_Reyes	CA_Point_Reyes	2
CA_Point_Reyes	CA_Point_Reyes	CA_Point_Reyes	1
CA_Point_Reyes	CA_Point_Reyes	CA_Point_Reyes	1
CA_Point_Reyes	CA_Point_Reyes	CA_Point_Reyes	1
CA_Point_Reyes	CA_Point_Reyes	CA_Point_Reyes	1
CA_Point_Reyes	CA_Point_Reyes	CA_Point_Reyes	1
CA_Point_Reyes	CA_Point_Reyes	CA_Point_Reyes	1
CA_Point_Reyes	CA_Point_Reyes	CA_Point_Reyes	1
CA_San F_cisco	CA_San F_cisco	CA_San F_cisco	190
CA_San F_cisco	CA_San F_cisco	CA_San F_cisco	48
CA_San F_cisco	CA_San F_cisco	CA_San F_cisco	29
CA_San F_cisco	CA_San F_cisco	CA_San F_cisco	29
CA_San F_cisco	CA_San F_cisco	CA_San F_cisco	25
CA_San F_cisco	CA_San F_cisco	CA_San F_cisco	21
CA_San F_cisco	CA_San F_cisco	CA_San F_cisco	20
CA_San F_cisco	CA_San F_cisco	CA_San F_cisco	20
CA_San F_cisco	CA_San F_cisco	CA_San F_cisco	20
CA_San F_cisco	CA_San F_cisco	CA_San F_cisco	18
CA_San F_cisco	CA_San F_cisco	CA_San F_cisco	17
CA_San F_cisco	CA_San F_cisco	CA_San F_cisco	17
CA_San F_cisco	CA_San F_cisco	CA_San F_cisco	14
CA_San F_cisco	CA_San F_cisco	CA_San F_cisco	13
CA_San F_cisco	CA_San F_cisco	CA_San F_cisco	13
CA_San F_cisco	CA_San F_cisco	CA_San F_cisco	10
CA_San F_cisco	CA_San F_cisco	CA_San F_cisco	6
CA_San F_cisco	CA_San F_cisco	CA_San F_cisco	6
CA_San F_cisco	CA_San F_cisco	CA_San F_cisco	4
CA_San F_cisco	CA_San F_cisco	CA_San F_cisco	4
CA_San F_cisco	CA_San F_cisco	CA_San F_cisco	2
CA_San F_cisco	CA_San F_cisco	CA_San F_cisco	1
CA_San F_cisco	CA_San F_cisco	CA_San F_cisco	1
CA_San F_cisco	CA_San F_cisco	CA_San F_cisco	1
CA_San F_cisco	CA_San F_cisco	CA_San F_cisco	1
CA_San J_n Co.	CA_San J_n Co.	CA_San J_n Co.	71
CA_San J_n Co.	CA_San J_n Co.	CA_San J_n Co.	31
CA_San J_n Co.	CA_San J_n Co.	CA_San J_n Co.	17
CA_San J_n Co.	CA_San J_n Co.	CA_San J_n Co.	13
CA_San J_n Co.	CA_San J_n Co.	CA_San J_n Co.	8
CA_San J_n Co.	CA_San J_n Co.	CA_San J_n Co.	8
CA_San J_n Co.	CA_San J_n Co.	CA_San J_n Co.	6
CA_San J_n Co.	CA_San J_n Co.	CA_San J_n Co.	5
CA_San J_n Co.	CA_San J_n Co.	CA_San J_n Co.	5
CA_San J_n Co.	CA_San J_n Co.	CA_San J_n Co.	5
CA_San J_n Co.	CA_San J_n Co.	CA_San J_n Co.	4
CA_San J_n Co.	CA_San J_n Co.	CA_San J_n Co.	3
CA_San J_n Co.	CA_San J_n Co.	CA_San J_n Co.	2
CA_San J_n Co.	CA_San J_n Co.	CA_San J_n Co.	2
CA_San J_n Co.	CA_San J_n Co.	CA_San J_n Co.	2
CA_San J_n Co.	CA_San J_n Co.	CA_San J_n Co.	1
CA_San J_n Co.	CA_San J_n Co.	CA_San J_n Co.	1
CA_San J_n Co.	CA_San J_n Co.	CA_San J_n Co.	1
CA_San J_n Co.	CA_San J_n Co.	CA_San J_n Co.	1
CA_Santa_anyon	CA_Santa_anyon	CA_Santa_anyon	37
CA_Santa_anyon	CA_Santa_anyon	CA_Santa_anyon	22
CA_Santa_anyon	CA_Santa_anyon	CA_Santa_anyon	14
CA_Santa_anyon	CA_Santa_anyon	CA_Santa_anyon	9
CA_Santa_anyon	CA_Santa_anyon	CA_Santa_anyon	8
CA_Santa_anyon	CA_Santa_anyon	CA_Santa_anyon	4
CA_Santa_anyon	CA_Santa_anyon	CA_Santa_anyon	4
CA_Santa_anyon	CA_Santa_anyon	CA_Santa_anyon	3
CA_Santa_anyon	CA_Santa_anyon	CA_Santa_anyon	3
CA_Santa_anyon	CA_Santa_anyon	CA_Santa_anyon	2
CA_Santa_anyon	CA_Santa_anyon	CA_Santa_anyon	2
CA_Santa_anyon	CA_Santa_anyon	CA_Santa_anyon	2
CA_Santa_anyon	CA_Santa_anyon	CA_Santa_anyon	1
CA_Santa_anyon	CA_Santa_anyon	CA_Santa_anyon	1
CA_Santa_anyon	CA_Santa_anyon	CA_Santa_anyon	1
CA_Santa_anyon	CA_Santa_anyon	CA_Santa_anyon	1
CA_White_ntain	CA_White_ntain	CA_White_ntain	105
CA_White_ntain	CA_White_ntain	CA_White_ntain	45
CA_White_ntain	CA_White_ntain	CA_White_ntain	32
CA_White_ntain	CA_White_ntain	CA_White_ntain	31
CA_White_ntain	CA_White_ntain	CA_White_ntain	22
CA_White_ntain	CA_White_ntain	CA_White_ntain	20
CA_White_ntain	CA_White_ntain	CA_White_ntain	13
CA_White_ntain	CA_White_ntain	CA_White_ntain	9
CA_White_ntain	CA_White_ntain	CA_White_ntain	9
CA_White_ntain	CA_White_ntain	CA_White_ntain	7
CA_White_ntain	CA_White_ntain	CA_White_ntain	5
CA_White_ntain	CA_White_ntain	CA_White_ntain	2
CA_White_ntain	CA_White_ntain	CA_White_ntain	2
CA_White_ntain	CA_White_ntain	CA_White_ntain	2
CA_White_ntain	CA_White_ntain	CA_White_ntain	1
CA_White_ntain	CA_White_ntain	CA_White_ntain	1
CA_White_ntain	CA_White_ntain	CA_White_ntain	1
CA_White_ntain	CA_White_ntain	CA_White_ntain	1
CA_White_ntain	CA_White_ntain	CA_White_ntain	1
CA_White_ntain	CA_White_ntain	CA_White_ntain	1
CA_Willo_lough	CA_Willo_lough	CA_Willo_lough	615
CA_Willo_lough	CA_Willo_lough	CA_Willo_lough	311
CA_Willo_lough	CA_Willo_lough	CA_Willo_lough	26
CA_Willo_lough	CA_Willo_lough	CA_Willo_lough	13
CA_Willo_lough	CA_Willo_lough	CA_Willo_lough	12
CA_Willo_lough	CA_Willo_lough	CA_Willo_lough	9
CA_Willo_lough	CA_Willo_lough	CA_Willo_lough	8
CA_Willo_lough	CA_Willo_lough	CA_Willo_lough	7
CA_Willo_lough	CA_Willo_lough	CA_Willo_lough	4
CA_Willo_lough	CA_Willo_lough	CA_Willo_lough	4
CA_Willo_lough	CA_Willo_lough	CA_Willo_lough	4
CA_Willo_lough	CA_Willo_lough	CA_Willo_lough	3
CA_Willo_lough	CA_Willo_lough	CA_Willo_lough	3
CA_Willo_lough	CA_Willo_lough	CA_Willo_lough	2
CA_Willo_lough	CA_Willo_lough	CA_Willo_lough	1
CA_Willo_lough	CA_Willo_lough	CA_Willo_lough	1
CA_Willo_lough	CA_Willo_lough	CA_Willo_lough	1
CA_Willo_lough	CA_Willo_lough	CA_Willo_lough	1
CA_Yuba _ Pass	CA_Yuba _ Pass	CA_Yuba _ Pass	559
CA_Yuba _ Pass	CA_Yuba _ Pass	CA_Yuba _ Pass	181
CA_Yuba _ Pass	CA_Yuba _ Pass	CA_Yuba _ Pass	134
CA_Yuba _ Pass	CA_Yuba _ Pass	CA_Yuba _ Pass	132
CA_Yuba _ Pass	CA_Yuba _ Pass	CA_Yuba _ Pass	73
CA_Yuba _ Pass	CA_Yuba _ Pass	CA_Yuba _ Pass	64
CA_Yuba _ Pass	CA_Yuba _ Pass	CA_Yuba _ Pass	62
CA_Yuba _ Pass	CA_Yuba _ Pass	CA_Yuba _ Pass	53
CA_Yuba _ Pass	CA_Yuba _ Pass	CA_Yuba _ Pass	41
CA_Yuba _ Pass	CA_Yuba _ Pass	CA_Yuba _ Pass	38
CA_Yuba _ Pass	CA_Yuba _ Pass	CA_Yuba _ Pass	36
CA_Yuba _ Pass	CA_Yuba _ Pass	CA_Yuba _ Pass	32
CA_Yuba _ Pass	CA_Yuba _ Pass	CA_Yuba _ Pass	32
CA_Yuba _ Pass	CA_Yuba _ Pass	CA_Yuba _ Pass	32
CA_Yuba _ Pass	CA_Yuba _ Pass	CA_Yuba _ Pass	31
CA_Yuba _ Pass	CA_Yuba _ Pass	CA_Yuba _ Pass	28
CA_Yuba _ Pass	CA_Yuba _ Pass	CA_Yuba _ Pass	25
CA_Yuba _ Pass	CA_Yuba _ Pass	CA_Yuba _ Pass	20
CA_Yuba _ Pass	CA_Yuba _ Pass	CA_Yuba _ Pass	19
CA_Yuba _ Pass	CA_Yuba _ Pass	CA_Yuba _ Pass	15
CA_Yuba _ Pass	CA_Yuba _ Pass	CA_Yuba _ Pass	12
CA_Yuba _ Pass	CA_Yuba _ Pass	CA_Yuba _ Pass	11
CA_Yuba _ Pass	CA_Yuba _ Pass	CA_Yuba _ Pass	10
CA_Yuba _ Pass	CA_Yuba _ Pass	CA_Yuba _ Pass	10
CA_Yuba _ Pass	CA_Yuba _ Pass	CA_Yuba _ Pass	10
CA_Yuba _ Pass	CA_Yuba _ Pass	CA_Yuba _ Pass	10
CA_Yuba _ Pass	CA_Yuba _ Pass	CA_Yuba _ Pass	9
CA_Yuba _ Pass	CA_Yuba _ Pass	CA_Yuba _ Pass	9
CA_Yuba _ Pass	CA_Yuba _ Pass	CA_Yuba _ Pass	8
CA_Yuba _ Pass	CA_Yuba _ Pass	CA_Yuba _ Pass	8
CA_Yuba _ Pass	CA_Yuba _ Pass	CA_Yuba _ Pass	8
CA_Yuba _ Pass	CA_Yuba _ Pass	CA_Yuba _ Pass	8
CA_Yuba _ Pass	CA_Yuba _ Pass	CA_Yuba _ Pass	7
CA_Yuba _ Pass	CA_Yuba _ Pass	CA_Yuba _ Pass	7
CA_Yuba _ Pass	CA_Yuba _ Pass	CA_Yuba _ Pass	7
CA_Yuba _ Pass	CA_Yuba _ Pass	CA_Yuba _ Pass	7
CA_Yuba _ Pass	CA_Yuba _ Pass	CA_Yuba _ Pass	6
CA_Yuba _ Pass	CA_Yuba _ Pass	CA_Yuba _ Pass	6
CA_Yuba _ Pass	CA_Yuba _ Pass	CA_Yuba _ Pass	5
CA_Yuba _ Pass	CA_Yuba _ Pass	CA_Yuba _ Pass	5
CA_Yuba _ Pass	CA_Yuba _ Pass	CA_Yuba _ Pass	5
CA_Yuba _ Pass	CA_Yuba _ Pass	CA_Yuba _ Pass	5
CA_Yuba _ Pass	CA_Yuba _ Pass	CA_Yuba _ Pass	5
CA_Yuba _ Pass	CA_Yuba _ Pass	CA_Yuba _ Pass	4
CA_Yuba _ Pass	CA_Yuba _ Pass	CA_Yuba _ Pass	4
CA_Yuba _ Pass	CA_Yuba _ Pass	CA_Yuba _ Pass	4
CA_Yuba _ Pass	CA_Yuba _ Pass	CA_Yuba _ Pass	4
CA_Yuba _ Pass	CA_Yuba _ Pass	CA_Yuba _ Pass	3
CA_Yuba _ Pass	CA_Yuba _ Pass	CA_Yuba _ Pass	3
CA_Yuba _ Pass	CA_Yuba _ Pass	CA_Yuba _ Pass	3
CA_Yuba _ Pass	CA_Yuba _ Pass	CA_Yuba _ Pass	3
CA_Yuba _ Pass	CA_Yuba _ Pass	CA_Yuba _ Pass	2
CA_Yuba _ Pass	CA_Yuba _ Pass	CA_Yuba _ Pass	2
CA_Yuba _ Pass	CA_Yuba _ Pass	CA_Yuba _ Pass	2
CA_Yuba _ Pass	CA_Yuba _ Pass	CA_Yuba _ Pass	2
CA_Yuba _ Pass	CA_Yuba _ Pass	CA_Yuba _ Pass	2
CA_Yuba _ Pass	CA_Yuba _ Pass	CA_Yuba _ Pass	2
CA_Yuba _ Pass	CA_Yuba _ Pass	CA_Yuba _ Pass	2
CA_Yuba _ Pass	CA_Yuba _ Pass	CA_Yuba _ Pass	2
CA_Yuba _ Pass	CA_Yuba _ Pass	CA_Yuba _ Pass	2
CA_Yuba _ Pass	CA_Yuba _ Pass	CA_Yuba _ Pass	1
CA_Yuba _ Pass	CA_Yuba _ Pass	CA_Yuba _ Pass	1
CA_Yuba _ Pass	CA_Yuba _ Pass	CA_Yuba _ Pass	1
CA_Yuba _ Pass	CA_Yuba _ Pass	CA_Yuba _ Pass	1
CA_Yuba _ Pass	CA_Yuba _ Pass	CA_Yuba _ Pass	1
CA_Yuba _ Pass	CA_Yuba _ Pass	CA_Yuba _ Pass	1
CA_Yuba _ Pass	CA_Yuba _ Pass	CA_Yuba _ Pass	1
CA_Yuba _ Pass	CA_Yuba _ Pass	CA_Yuba _ Pass	1
CA_Yuba _ Pass	CA_Yuba _ Pass	CA_Yuba _ Pass	1
CA_Yuba _ Pass	CA_Yuba _ Pass	CA_Yuba _ Pass	1
CA_Yuba _ Pass	CA_Yuba _ Pass	CA_Yuba _ Pass	1
CA_Yuba _ Pass	CA_Yuba _ Pass	CA_Yuba _ Pass	1
CA_Yuba _ Pass	CA_Yuba _ Pass	CA_Yuba _ Pass	1
CA_Yuba _ Pass	CA_Yuba _ Pass	CA_Yuba _ Pass	1
CA_Yuba _ Pass	CA_Yuba _ Pass	CA_Yuba _ Pass	1
CA_Yuba _ Pass	CA_Yuba _ Pass	CA_Yuba _ Pass	1
CA_Yuba _ Pass	CA_Yuba _ Pass	CA_Yuba _ Pass	1
CA_Yuba _ Pass	CA_Yuba _ Pass	CA_Yuba _ Pass	1
CO_Cal-W_enter	CO_Cal-W_enter	CO_Cal-W_enter	269
CO_Cal-W_enter	CO_Cal-W_enter	CO_Cal-W_enter	33
CO_Cal-W_enter	CO_Cal-W_enter	CO_Cal-W_enter	25
CO_Cal-W_enter	CO_Cal-W_enter	CO_Cal-W_enter	24
CO_Cal-W_enter	CO_Cal-W_enter	CO_Cal-W_enter	11
CO_Cal-W_enter	CO_Cal-W_enter	CO_Cal-W_enter	11
CO_Cal-W_enter	CO_Cal-W_enter	CO_Cal-W_enter	9
CO_Cal-W_enter	CO_Cal-W_enter	CO_Cal-W_enter	8
CO_Cal-W_enter	CO_Cal-W_enter	CO_Cal-W_enter	7
CO_Cal-W_enter	CO_Cal-W_enter	CO_Cal-W_enter	6
CO_Cal-W_enter	CO_Cal-W_enter	CO_Cal-W_enter	6
CO_Cal-W_enter	CO_Cal-W_enter	CO_Cal-W_enter	4
CO_Cal-W_enter	CO_Cal-W_enter	CO_Cal-W_enter	3
CO_Cal-W_enter	CO_Cal-W_enter	CO_Cal-W_enter	3
CO_Cal-W_enter	CO_Cal-W_enter	CO_Cal-W_enter	3
CO_Cal-W_enter	CO_Cal-W_enter	CO_Cal-W_enter	2
CO_Cal-W_enter	CO_Cal-W_enter	CO_Cal-W_enter	2
CO_Cal-W_enter	CO_Cal-W_enter	CO_Cal-W_enter	2
CO_Cal-W_enter	CO_Cal-W_enter	CO_Cal-W_enter	1
CO_Cal-W_enter	CO_Cal-W_enter	CO_Cal-W_enter	1
CO_Cal-W_enter	CO_Cal-W_enter	CO_Cal-W_enter	1
CO_Cal-W_enter	CO_Cal-W_enter	CO_Cal-W_enter	1
CO_Gilpi_n Co.	CO_Gilpi_n Co.	CO_Gilpi_n Co.	341
CO_Gilpi_n Co.	CO_Gilpi_n Co.	CO_Gilpi_n Co.	161
CO_Gilpi_n Co.	CO_Gilpi_n Co.	CO_Gilpi_n Co.	89
CO_Gilpi_n Co.	CO_Gilpi_n Co.	CO_Gilpi_n Co.	55
CO_Gilpi_n Co.	CO_Gilpi_n Co.	CO_Gilpi_n Co.	34
CO_Gilpi_n Co.	CO_Gilpi_n Co.	CO_Gilpi_n Co.	33
CO_Gilpi_n Co.	CO_Gilpi_n Co.	CO_Gilpi_n Co.	21
CO_Gilpi_n Co.	CO_Gilpi_n Co.	CO_Gilpi_n Co.	19
CO_Gilpi_n Co.	CO_Gilpi_n Co.	CO_Gilpi_n Co.	15
CO_Gilpi_n Co.	CO_Gilpi_n Co.	CO_Gilpi_n Co.	15
CO_Gilpi_n Co.	CO_Gilpi_n Co.	CO_Gilpi_n Co.	14
CO_Gilpi_n Co.	CO_Gilpi_n Co.	CO_Gilpi_n Co.	13
CO_Gilpi_n Co.	CO_Gilpi_n Co.	CO_Gilpi_n Co.	13
CO_Gilpi_n Co.	CO_Gilpi_n Co.	CO_Gilpi_n Co.	11
CO_Gilpi_n Co.	CO_Gilpi_n Co.	CO_Gilpi_n Co.	11
CO_Gilpi_n Co.	CO_Gilpi_n Co.	CO_Gilpi_n Co.	10
CO_Gilpi_n Co.	CO_Gilpi_n Co.	CO_Gilpi_n Co.	9
CO_Gilpi_n Co.	CO_Gilpi_n Co.	CO_Gilpi_n Co.	9
CO_Gilpi_n Co.	CO_Gilpi_n Co.	CO_Gilpi_n Co.	9
CO_Gilpi_n Co.	CO_Gilpi_n Co.	CO_Gilpi_n Co.	9
CO_Gilpi_n Co.	CO_Gilpi_n Co.	CO_Gilpi_n Co.	9
CO_Gilpi_n Co.	CO_Gilpi_n Co.	CO_Gilpi_n Co.	8
CO_Gilpi_n Co.	CO_Gilpi_n Co.	CO_Gilpi_n Co.	8
CO_Gilpi_n Co.	CO_Gilpi_n Co.	CO_Gilpi_n Co.	7
CO_Gilpi_n Co.	CO_Gilpi_n Co.	CO_Gilpi_n Co.	7
CO_Gilpi_n Co.	CO_Gilpi_n Co.	CO_Gilpi_n Co.	7
CO_Gilpi_n Co.	CO_Gilpi_n Co.	CO_Gilpi_n Co.	7
CO_Gilpi_n Co.	CO_Gilpi_n Co.	CO_Gilpi_n Co.	7
CO_Gilpi_n Co.	CO_Gilpi_n Co.	CO_Gilpi_n Co.	6
CO_Gilpi_n Co.	CO_Gilpi_n Co.	CO_Gilpi_n Co.	6
CO_Gilpi_n Co.	CO_Gilpi_n Co.	CO_Gilpi_n Co.	5
CO_Gilpi_n Co.	CO_Gilpi_n Co.	CO_Gilpi_n Co.	5
CO_Gilpi_n Co.	CO_Gilpi_n Co.	CO_Gilpi_n Co.	5
CO_Gilpi_n Co.	CO_Gilpi_n Co.	CO_Gilpi_n Co.	5
CO_Gilpi_n Co.	CO_Gilpi_n Co.	CO_Gilpi_n Co.	4
CO_Gilpi_n Co.	CO_Gilpi_n Co.	CO_Gilpi_n Co.	4
CO_Gilpi_n Co.	CO_Gilpi_n Co.	CO_Gilpi_n Co.	4
CO_Gilpi_n Co.	CO_Gilpi_n Co.	CO_Gilpi_n Co.	3
CO_Gilpi_n Co.	CO_Gilpi_n Co.	CO_Gilpi_n Co.	3
CO_Gilpi_n Co.	CO_Gilpi_n Co.	CO_Gilpi_n Co.	3
CO_Gilpi_n Co.	CO_Gilpi_n Co.	CO_Gilpi_n Co.	3
CO_Gilpi_n Co.	CO_Gilpi_n Co.	CO_Gilpi_n Co.	3
CO_Gilpi_n Co.	CO_Gilpi_n Co.	CO_Gilpi_n Co.	3
CO_Gilpi_n Co.	CO_Gilpi_n Co.	CO_Gilpi_n Co.	2
CO_Gilpi_n Co.	CO_Gilpi_n Co.	CO_Gilpi_n Co.	2
CO_Gilpi_n Co.	CO_Gilpi_n Co.	CO_Gilpi_n Co.	2
CO_Gilpi_n Co.	CO_Gilpi_n Co.	CO_Gilpi_n Co.	2
CO_Gilpi_n Co.	CO_Gilpi_n Co.	CO_Gilpi_n Co.	2
CO_Gilpi_n Co.	CO_Gilpi_n Co.	CO_Gilpi_n Co.	2
CO_Gilpi_n Co.	CO_Gilpi_n Co.	CO_Gilpi_n Co.	2
CO_Gilpi_n Co.	CO_Gilpi_n Co.	CO_Gilpi_n Co.	2
CO_Gilpi_n Co.	CO_Gilpi_n Co.	CO_Gilpi_n Co.	2
CO_Gilpi_n Co.	CO_Gilpi_n Co.	CO_Gilpi_n Co.	1
CO_Gilpi_n Co.	CO_Gilpi_n Co.	CO_Gilpi_n Co.	1
CO_Gilpi_n Co.	CO_Gilpi_n Co.	CO_Gilpi_n Co.	1
CO_Gilpi_n Co.	CO_Gilpi_n Co.	CO_Gilpi_n Co.	1
CO_Gilpi_n Co.	CO_Gilpi_n Co.	CO_Gilpi_n Co.	1
CO_Gilpi_n Co.	CO_Gilpi_n Co.	CO_Gilpi_n Co.	1
CO_Gilpi_n Co.	CO_Gilpi_n Co.	CO_Gilpi_n Co.	1
CO_Gilpi_n Co.	CO_Gilpi_n Co.	CO_Gilpi_n Co.	1
CO_Gilpi_n Co.	CO_Gilpi_n Co.	CO_Gilpi_n Co.	1
CO_Gilpi_n Co.	CO_Gilpi_n Co.	CO_Gilpi_n Co.	1
CO_Gilpi_n Co.	CO_Gilpi_n Co.	CO_Gilpi_n Co.	1
CO_Gilpi_n Co.	CO_Gilpi_n Co.	CO_Gilpi_n Co.	1
CO_Roose_orest	CO_Roose_orest	CO_Roose_orest	7
CO_Roose_orest	CO_Roose_orest	CO_Roose_orest	6
CO_Roose_orest	CO_Roose_orest	CO_Roose_orest	5
CO_Roose_orest	CO_Roose_orest	CO_Roose_orest	3
CO_Roose_orest	CO_Roose_orest	CO_Roose_orest	2
CO_Roose_orest	CO_Roose_orest	CO_Roose_orest	2
CO_Roose_orest	CO_Roose_orest	CO_Roose_orest	2
CO_Roose_orest	CO_Roose_orest	CO_Roose_orest	1
CO_Roose_orest	CO_Roose_orest	CO_Roose_orest	1
CO_Roose_orest	CO_Roose_orest	CO_Roose_orest	1
CO_Roose_orest	CO_Roose_orest	CO_Roose_orest	1
CO_Roose_orest	CO_Roose_orest	CO_Roose_orest	1
CO_Roose_orest	CO_Roose_orest	CO_Roose_orest	1
CO_Roose_orest	CO_Roose_orest	CO_Roose_orest	1
CO_Roose_orest	CO_Roose_orest	CO_Roose_orest	1
CO_Roose_orest	CO_Roose_orest	CO_Roose_orest	1
CO_Roose_orest	CO_Roose_orest	CO_Roose_orest	1
CO_Roose_orest	CO_Roose_orest	CO_Roose_orest	1
CT_East _nbury	CT_East _nbury	CT_East _nbury	59
CT_East _nbury	CT_East _nbury	CT_East _nbury	41
CT_East _nbury	CT_East _nbury	CT_East _nbury	28
CT_East _nbury	CT_East _nbury	CT_East _nbury	28
CT_East _nbury	CT_East _nbury	CT_East _nbury	15
CT_East _nbury	CT_East _nbury	CT_East _nbury	13
CT_East _nbury	CT_East _nbury	CT_East _nbury	12
CT_East _nbury	CT_East _nbury	CT_East _nbury	11
CT_East _nbury	CT_East _nbury	CT_East _nbury	6
CT_East _nbury	CT_East _nbury	CT_East _nbury	6
CT_East _nbury	CT_East _nbury	CT_East _nbury	4
CT_East _nbury	CT_East _nbury	CT_East _nbury	3
CT_East _nbury	CT_East _nbury	CT_East _nbury	3
CT_East _nbury	CT_East _nbury	CT_East _nbury	3
CT_East _nbury	CT_East _nbury	CT_East _nbury	3
CT_East _nbury	CT_East _nbury	CT_East _nbury	3
CT_East _nbury	CT_East _nbury	CT_East _nbury	2
CT_East _nbury	CT_East _nbury	CT_East _nbury	1
CT_East _nbury	CT_East _nbury	CT_East _nbury	1
CT_East _nbury	CT_East _nbury	CT_East _nbury	1
CT_East _nbury	CT_East _nbury	CT_East _nbury	1
CT_East _nbury	CT_East _nbury	CT_East _nbury	1
CT_East _nbury	CT_East _nbury	CT_East _nbury	1
CT_East _nbury	CT_East _nbury	CT_East _nbury	1
CT_East _nbury	CT_East _nbury	CT_East _nbury	1
CT_East _nbury	CT_East _nbury	CT_East _nbury	1
CT_East _nbury	CT_East _nbury	CT_East _nbury	1
CT_East _nbury	CT_East _nbury	CT_East _nbury	1
CT_Farmi_alley	CT_Farmi_alley	CT_Farmi_alley	223
CT_Farmi_alley	CT_Farmi_alley	CT_Farmi_alley	105
CT_Farmi_alley	CT_Farmi_alley	CT_Farmi_alley	74
CT_Farmi_alley	CT_Farmi_alley	CT_Farmi_alley	54
CT_Farmi_alley	CT_Farmi_alley	CT_Farmi_alley	46
CT_Farmi_alley	CT_Farmi_alley	CT_Farmi_alley	43
CT_Farmi_alley	CT_Farmi_alley	CT_Farmi_alley	36
CT_Farmi_alley	CT_Farmi_alley	CT_Farmi_alley	28
CT_Farmi_alley	CT_Farmi_alley	CT_Farmi_alley	22
CT_Farmi_alley	CT_Farmi_alley	CT_Farmi_alley	21
CT_Farmi_alley	CT_Farmi_alley	CT_Farmi_alley	20
CT_Farmi_alley	CT_Farmi_alley	CT_Farmi_alley	20
CT_Farmi_alley	CT_Farmi_alley	CT_Farmi_alley	18
CT_Farmi_alley	CT_Farmi_alley	CT_Farmi_alley	17
CT_Farmi_alley	CT_Farmi_alley	CT_Farmi_alley	14
CT_Farmi_alley	CT_Farmi_alley	CT_Farmi_alley	13
CT_Farmi_alley	CT_Farmi_alley	CT_Farmi_alley	11
CT_Farmi_alley	CT_Farmi_alley	CT_Farmi_alley	9
CT_Farmi_alley	CT_Farmi_alley	CT_Farmi_alley	8
CT_Farmi_alley	CT_Farmi_alley	CT_Farmi_alley	6
CT_Farmi_alley	CT_Farmi_alley	CT_Farmi_alley	6
CT_Farmi_alley	CT_Farmi_alley	CT_Farmi_alley	5
CT_Farmi_alley	CT_Farmi_alley	CT_Farmi_alley	4
CT_Farmi_alley	CT_Farmi_alley	CT_Farmi_alley	3
CT_Farmi_alley	CT_Farmi_alley	CT_Farmi_alley	3
CT_Farmi_alley	CT_Farmi_alley	CT_Farmi_alley	3
CT_Farmi_alley	CT_Farmi_alley	CT_Farmi_alley	3
CT_Farmi_alley	CT_Farmi_alley	CT_Farmi_alley	3
CT_Farmi_alley	CT_Farmi_alley	CT_Farmi_alley	2
CT_Farmi_alley	CT_Farmi_alley	CT_Farmi_alley	2
CT_Farmi_alley	CT_Farmi_alley	CT_Farmi_alley	1
CT_Farmi_alley	CT_Farmi_alley	CT_Farmi_alley	1
CT_Merid_riden	CT_Merid_riden	CT_Merid_riden	258
CT_Merid_riden	CT_Merid_riden	CT_Merid_riden	239
CT_Merid_riden	CT_Merid_riden	CT_Merid_riden	26
CT_Merid_riden	CT_Merid_riden	CT_Merid_riden	24
CT_Merid_riden	CT_Merid_riden	CT_Merid_riden	15
CT_Merid_riden	CT_Merid_riden	CT_Merid_riden	15
CT_Merid_riden	CT_Merid_riden	CT_Merid_riden	11
CT_Merid_riden	CT_Merid_riden	CT_Merid_riden	6
CT_Merid_riden	CT_Merid_riden	CT_Merid_riden	5
CT_Merid_riden	CT_Merid_riden	CT_Merid_riden	4
CT_Merid_riden	CT_Merid_riden	CT_Merid_riden	3
CT_Merid_riden	CT_Merid_riden	CT_Merid_riden	3
CT_Merid_riden	CT_Merid_riden	CT_Merid_riden	2
CT_Merid_riden	CT_Merid_riden	CT_Merid_riden	2
CT_Merid_riden	CT_Merid_riden	CT_Merid_riden	2
CT_Merid_riden	CT_Merid_riden	CT_Merid_riden	2
CT_Merid_riden	CT_Merid_riden	CT_Merid_riden	2
CT_Merid_riden	CT_Merid_riden	CT_Merid_riden	1
CT_Merid_riden	CT_Merid_riden	CT_Merid_riden	1
CT_Merid_riden	CT_Merid_riden	CT_Merid_riden	1
CT_Merid_riden	CT_Merid_riden	CT_Merid_riden	1
CT_South_n Co.	CT_South_n Co.	CT_South_n Co.	15
CT_South_n Co.	CT_South_n Co.	CT_South_n Co.	12
CT_South_n Co.	CT_South_n Co.	CT_South_n Co.	6
CT_South_n Co.	CT_South_n Co.	CT_South_n Co.	4
CT_South_n Co.	CT_South_n Co.	CT_South_n Co.	4
CT_South_n Co.	CT_South_n Co.	CT_South_n Co.	3
CT_South_n Co.	CT_South_n Co.	CT_South_n Co.	3
CT_South_n Co.	CT_South_n Co.	CT_South_n Co.	2
CT_South_n Co.	CT_South_n Co.	CT_South_n Co.	2
CT_South_n Co.	CT_South_n Co.	CT_South_n Co.	2
CT_South_n Co.	CT_South_n Co.	CT_South_n Co.	2
CT_South_n Co.	CT_South_n Co.	CT_South_n Co.	2
CT_South_n Co.	CT_South_n Co.	CT_South_n Co.	1
CT_South_n Co.	CT_South_n Co.	CT_South_n Co.	1
CT_South_n Co.	CT_South_n Co.	CT_South_n Co.	1
CT_South_n Co.	CT_South_n Co.	CT_South_n Co.	1
CT_South_n Co.	CT_South_n Co.	CT_South_n Co.	1
CT_South_n Co.	CT_South_n Co.	CT_South_n Co.	1
CT_South_n Co.	CT_South_n Co.	CT_South_n Co.	1
CT_South_n Co.	CT_South_n Co.	CT_South_n Co.	1
CT_South_n Co.	CT_South_n Co.	CT_South_n Co.	1
CT_South_n Co.	CT_South_n Co.	CT_South_n Co.	1
CT_South_n Co.	CT_South_n Co.	CT_South_n Co.	1
CT_South_n Co.	CT_South_n Co.	CT_South_n Co.	1
CT_Storr_torrs	CT_Storr_torrs	CT_Storr_torrs	25
CT_Storr_torrs	CT_Storr_torrs	CT_Storr_torrs	12
CT_Storr_torrs	CT_Storr_torrs	CT_Storr_torrs	11
CT_Storr_torrs	CT_Storr_torrs	CT_Storr_torrs	8
CT_Storr_torrs	CT_Storr_torrs	CT_Storr_torrs	7
CT_Storr_torrs	CT_Storr_torrs	CT_Storr_torrs	6
CT_Storr_torrs	CT_Storr_torrs	CT_Storr_torrs	5
CT_Storr_torrs	CT_Storr_torrs	CT_Storr_torrs	4
CT_Storr_torrs	CT_Storr_torrs	CT_Storr_torrs	3
CT_Storr_torrs	CT_Storr_torrs	CT_Storr_torrs	3
CT_Storr_torrs	CT_Storr_torrs	CT_Storr_torrs	2
CT_Storr_torrs	CT_Storr_torrs	CT_Storr_torrs	2
CT_Storr_torrs	CT_Storr_torrs	CT_Storr_torrs	2
CT_Storr_torrs	CT_Storr_torrs	CT_Storr_torrs	2
CT_Storr_torrs	CT_Storr_torrs	CT_Storr_torrs	2
CT_Storr_torrs	CT_Storr_torrs	CT_Storr_torrs	2
CT_Storr_torrs	CT_Storr_torrs	CT_Storr_torrs	2
CT_Storr_torrs	CT_Storr_torrs	CT_Storr_torrs	2
CT_Storr_torrs	CT_Storr_torrs	CT_Storr_torrs	1
CT_Storr_torrs	CT_Storr_torrs	CT_Storr_torrs	1
CT_Storr_torrs	CT_Storr_torrs	CT_Storr_torrs	1
CT_Storr_torrs	CT_Storr_torrs	CT_Storr_torrs	1
CT_Storr_torrs	CT_Storr_torrs	CT_Storr_torrs	1
CT_Storr_torrs	CT_Storr_torrs	CT_Storr_torrs	1
CT_Storr_torrs	CT_Storr_torrs	CT_Storr_torrs	1
CT_Storr_torrs	CT_Storr_torrs	CT_Storr_torrs	1
CT_Storr_torrs	CT_Storr_torrs	CT_Storr_torrs	1
CT_Storr_torrs	CT_Storr_torrs	CT_Storr_torrs	1
CT_West _d Co.	CT_West _d Co.	CT_West _d Co.	99
CT_West _d Co.	CT_West _d Co.	CT_West _d Co.	67
CT_West _d Co.	CT_West _d Co.	CT_West _d Co.	60
CT_West _d Co.	CT_West _d Co.	CT_West _d Co.	42
CT_West _d Co.	CT_West _d Co.	CT_West _d Co.	24
CT_West _d Co.	CT_West _d Co.	CT_West _d Co.	13
CT_West _d Co.	CT_West _d Co.	CT_West _d Co.	9
CT_West _d Co.	CT_West _d Co.	CT_West _d Co.	9
CT_West _d Co.	CT_West _d Co.	CT_West _d Co.	7
CT_West _d Co.	CT_West _d Co.	CT_West _d Co.	7
CT_West _d Co.	CT_West _d Co.	CT_West _d Co.	6
CT_West _d Co.	CT_West _d Co.	CT_West _d Co.	5
CT_West _d Co.	CT_West _d Co.	CT_West _d Co.	2
CT_West _d Co.	CT_West _d Co.	CT_West _d Co.	2
CT_West _d Co.	CT_West _d Co.	CT_West _d Co.	2
CT_West _d Co.	CT_West _d Co.	CT_West _d Co.	2
CT_West _d Co.	CT_West _d Co.	CT_West _d Co.	1
CT_West _d Co.	CT_West _d Co.	CT_West _d Co.	1
CT_West _d Co.	CT_West _d Co.	CT_West _d Co.	1
CT_West _d Co.	CT_West _d Co.	CT_West _d Co.	1
CT_West _d Co.	CT_West _d Co.	CT_West _d Co.	1
CT_West _d Co.	CT_West _d Co.	CT_West _d Co.	1
CT_West _d Co.	CT_West _d Co.	CT_West _d Co.	1
CT_West _d Co.	CT_West _d Co.	CT_West _d Co.	1
FL_Alva_Alva	FL_Alva_Alva	FL_Alva_Alva	135
FL_Alva_Alva	FL_Alva_Alva	FL_Alva_Alva	125
FL_Alva_Alva	FL_Alva_Alva	FL_Alva_Alva	94
FL_Alva_Alva	FL_Alva_Alva	FL_Alva_Alva	87
FL_Alva_Alva	FL_Alva_Alva	FL_Alva_Alva	42
FL_Alva_Alva	FL_Alva_Alva	FL_Alva_Alva	28
FL_Alva_Alva	FL_Alva_Alva	FL_Alva_Alva	25
FL_Alva_Alva	FL_Alva_Alva	FL_Alva_Alva	25
FL_Alva_Alva	FL_Alva_Alva	FL_Alva_Alva	17
FL_Alva_Alva	FL_Alva_Alva	FL_Alva_Alva	15
FL_Alva_Alva	FL_Alva_Alva	FL_Alva_Alva	15
FL_Alva_Alva	FL_Alva_Alva	FL_Alva_Alva	12
FL_Alva_Alva	FL_Alva_Alva	FL_Alva_Alva	7
FL_Alva_Alva	FL_Alva_Alva	FL_Alva_Alva	6
FL_Alva_Alva	FL_Alva_Alva	FL_Alva_Alva	5
FL_Alva_Alva	FL_Alva_Alva	FL_Alva_Alva	5
FL_Alva_Alva	FL_Alva_Alva	FL_Alva_Alva	3
FL_Alva_Alva	FL_Alva_Alva	FL_Alva_Alva	3
FL_Alva_Alva	FL_Alva_Alva	FL_Alva_Alva	3
FL_Alva_Alva	FL_Alva_Alva	FL_Alva_Alva	2
FL_Alva_Alva	FL_Alva_Alva	FL_Alva_Alva	2
FL_Alva_Alva	FL_Alva_Alva	FL_Alva_Alva	2
FL_Alva_Alva	FL_Alva_Alva	FL_Alva_Alva	2
FL_Alva_Alva	FL_Alva_Alva	FL_Alva_Alva	1
FL_Alva_Alva	FL_Alva_Alva	FL_Alva_Alva	1
FL_Alva_Alva	FL_Alva_Alva	FL_Alva_Alva	1
FL_Alva_Alva	FL_Alva_Alva	FL_Alva_Alva	1
FL_Annut_mmock	FL_Annut_mmock	FL_Annut_mmock	32
FL_Annut_mmock	FL_Annut_mmock	FL_Annut_mmock	20
FL_Annut_mmock	FL_Annut_mmock	FL_Annut_mmock	19
FL_Annut_mmock	FL_Annut_mmock	FL_Annut_mmock	17
FL_Annut_mmock	FL_Annut_mmock	FL_Annut_mmock	17
FL_Annut_mmock	FL_Annut_mmock	FL_Annut_mmock	13
FL_Annut_mmock	FL_Annut_mmock	FL_Annut_mmock	12
FL_Annut_mmock	FL_Annut_mmock	FL_Annut_mmock	11
FL_Annut_mmock	FL_Annut_mmock	FL_Annut_mmock	10
FL_Annut_mmock	FL_Annut_mmock	FL_Annut_mmock	5
FL_Annut_mmock	FL_Annut_mmock	FL_Annut_mmock	4
FL_Annut_mmock	FL_Annut_mmock	FL_Annut_mmock	4
FL_Annut_mmock	FL_Annut_mmock	FL_Annut_mmock	3
FL_Annut_mmock	FL_Annut_mmock	FL_Annut_mmock	3
FL_Annut_mmock	FL_Annut_mmock	FL_Annut_mmock	3
FL_Annut_mmock	FL_Annut_mmock	FL_Annut_mmock	3
FL_Annut_mmock	FL_Annut_mmock	FL_Annut_mmock	2
FL_Annut_mmock	FL_Annut_mmock	FL_Annut_mmock	2
FL_Annut_mmock	FL_Annut_mmock	FL_Annut_mmock	1
FL_Annut_mmock	FL_Annut_mmock	FL_Annut_mmock	1
FL_Annut_mmock	FL_Annut_mmock	FL_Annut_mmock	1
FL_Annut_mmock	FL_Annut_mmock	FL_Annut_mmock	1
FL_Annut_mmock	FL_Annut_mmock	FL_Annut_mmock	1
FL_Annut_mmock	FL_Annut_mmock	FL_Annut_mmock	1
FL_Annut_mmock	FL_Annut_mmock	FL_Annut_mmock	1
FL_Annut_mmock	FL_Annut_mmock	FL_Annut_mmock	1
FL_Annut_mmock	FL_Annut_mmock	FL_Annut_mmock	1
FL_Annut_mmock	FL_Annut_mmock	FL_Annut_mmock	1
FL_Annut_mmock	FL_Annut_mmock	FL_Annut_mmock	1
FL_Annut_mmock	FL_Annut_mmock	FL_Annut_mmock	1
FL_Annut_mmock	FL_Annut_mmock	FL_Annut_mmock	1
FL_Annut_mmock	FL_Annut_mmock	FL_Annut_mmock	1
FL_Arche_rcher	FL_Arche_rcher	FL_Arche_rcher	267
FL_Arche_rcher	FL_Arche_rcher	FL_Arche_rcher	245
FL_Arche_rcher	FL_Arche_rcher	FL_Arche_rcher	185
FL_Arche_rcher	FL_Arche_rcher	FL_Arche_rcher	140
FL_Arche_rcher	FL_Arche_rcher	FL_Arche_rcher	74
FL_Arche_rcher	FL_Arche_rcher	FL_Arche_rcher	68
FL_Arche_rcher	FL_Arche_rcher	FL_Arche_rcher	48
FL_Arche_rcher	FL_Arche_rcher	FL_Arche_rcher	40
FL_Arche_rcher	FL_Arche_rcher	FL_Arche_rcher	39
FL_Arche_rcher	FL_Arche_rcher	FL_Arche_rcher	35
FL_Arche_rcher	FL_Arche_rcher	FL_Arche_rcher	22
FL_Arche_rcher	FL_Arche_rcher	FL_Arche_rcher	18
FL_Arche_rcher	FL_Arche_rcher	FL_Arche_rcher	16
FL_Arche_rcher	FL_Arche_rcher	FL_Arche_rcher	15
FL_Arche_rcher	FL_Arche_rcher	FL_Arche_rcher	15
FL_Arche_rcher	FL_Arche_rcher	FL_Arche_rcher	15
FL_Arche_rcher	FL_Arche_rcher	FL_Arche_rcher	13
FL_Arche_rcher	FL_Arche_rcher	FL_Arche_rcher	12
FL_Arche_rcher	FL_Arche_rcher	FL_Arche_rcher	8
FL_Arche_rcher	FL_Arche_rcher	FL_Arche_rcher	8
FL_Arche_rcher	FL_Arche_rcher	FL_Arche_rcher	8
FL_Arche_rcher	FL_Arche_rcher	FL_Arche_rcher	7
FL_Arche_rcher	FL_Arche_rcher	FL_Arche_rcher	7
FL_Arche_rcher	FL_Arche_rcher	FL_Arche_rcher	6
FL_Arche_rcher	FL_Arche_rcher	FL_Arche_rcher	6
FL_Arche_rcher	FL_Arche_rcher	FL_Arche_rcher	4
FL_Arche_rcher	FL_Arche_rcher	FL_Arche_rcher	4
FL_Arche_rcher	FL_Arche_rcher	FL_Arche_rcher	4
FL_Arche_rcher	FL_Arche_rcher	FL_Arche_rcher	3
FL_Arche_rcher	FL_Arche_rcher	FL_Arche_rcher	3
FL_Arche_rcher	FL_Arche_rcher	FL_Arche_rcher	3
FL_Arche_rcher	FL_Arche_rcher	FL_Arche_rcher	2
FL_Arche_rcher	FL_Arche_rcher	FL_Arche_rcher	2
FL_Arche_rcher	FL_Arche_rcher	FL_Arche_rcher	2
FL_Arche_rcher	FL_Arche_rcher	FL_Arche_rcher	2
FL_Arche_rcher	FL_Arche_rcher	FL_Arche_rcher	2
FL_Arche_rcher	FL_Arche_rcher	FL_Arche_rcher	2
FL_Arche_rcher	FL_Arche_rcher	FL_Arche_rcher	2
FL_Arche_rcher	FL_Arche_rcher	FL_Arche_rcher	2
FL_Arche_rcher	FL_Arche_rcher	FL_Arche_rcher	2
FL_Arche_rcher	FL_Arche_rcher	FL_Arche_rcher	2
FL_Arche_rcher	FL_Arche_rcher	FL_Arche_rcher	2
FL_Arche_rcher	FL_Arche_rcher	FL_Arche_rcher	2
FL_Arche_rcher	FL_Arche_rcher	FL_Arche_rcher	2
FL_Arche_rcher	FL_Arche_rcher	FL_Arche_rcher	2
FL_Arche_rcher	FL_Arche_rcher	FL_Arche_rcher	2
FL_Arche_rcher	FL_Arche_rcher	FL_Arche_rcher	2
FL_Arche_rcher	FL_Arche_rcher	FL_Arche_rcher	1
FL_Arche_rcher	FL_Arche_rcher	FL_Arche_rcher	1
FL_Arche_rcher	FL_Arche_rcher	FL_Arche_rcher	1
FL_Arche_rcher	FL_Arche_rcher	FL_Arche_rcher	1
FL_Arche_rcher	FL_Arche_rcher	FL_Arche_rcher	1
FL_Arche_rcher	FL_Arche_rcher	FL_Arche_rcher	1
FL_Arche_rcher	FL_Arche_rcher	FL_Arche_rcher	1
FL_Arche_rcher	FL_Arche_rcher	FL_Arche_rcher	1
FL_Avon _Range	FL_Avon _Range	FL_Avon _Range	121
FL_Avon _Range	FL_Avon _Range	FL_Avon _Range	70
FL_Avon _Range	FL_Avon _Range	FL_Avon _Range	38
FL_Avon _Range	FL_Avon _Range	FL_Avon _Range	33
FL_Avon _Range	FL_Avon _Range	FL_Avon _Range	33
FL_Avon _Range	FL_Avon _Range	FL_Avon _Range	31
FL_Avon _Range	FL_Avon _Range	FL_Avon _Range	28
FL_Avon _Range	FL_Avon _Range	FL_Avon _Range	23
FL_Avon _Range	FL_Avon _Range	FL_Avon _Range	23
FL_Avon _Range	FL_Avon _Range	FL_Avon _Range	12
FL_Avon _Range	FL_Avon _Range	FL_Avon _Range	11
FL_Avon _Range	FL_Avon _Range	FL_Avon _Range	11
FL_Avon _Range	FL_Avon _Range	FL_Avon _Range	10
FL_Avon _Range	FL_Avon _Range	FL_Avon _Range	9
FL_Avon _Range	FL_Avon _Range	FL_Avon _Range	8
FL_Avon _Range	FL_Avon _Range	FL_Avon _Range	7
FL_Avon _Range	FL_Avon _Range	FL_Avon _Range	7
FL_Avon _Range	FL_Avon _Range	FL_Avon _Range	6
FL_Avon _Range	FL_Avon _Range	FL_Avon _Range	5
FL_Avon _Range	FL_Avon _Range	FL_Avon _Range	5
FL_Avon _Range	FL_Avon _Range	FL_Avon _Range	4
FL_Avon _Range	FL_Avon _Range	FL_Avon _Range	4
FL_Avon _Range	FL_Avon _Range	FL_Avon _Range	3
FL_Avon _Range	FL_Avon _Range	FL_Avon _Range	3
FL_Avon _Range	FL_Avon _Range	FL_Avon _Range	3
FL_Avon _Range	FL_Avon _Range	FL_Avon _Range	3
FL_Avon _Range	FL_Avon _Range	FL_Avon _Range	2
FL_Avon _Range	FL_Avon _Range	FL_Avon _Range	2
FL_Avon _Range	FL_Avon _Range	FL_Avon _Range	2
FL_Avon _Range	FL_Avon _Range	FL_Avon _Range	1
FL_Avon _Range	FL_Avon _Range	FL_Avon _Range	1
FL_Avon _Range	FL_Avon _Range	FL_Avon _Range	1
FL_Avon _Range	FL_Avon _Range	FL_Avon _Range	1
FL_Avon _Range	FL_Avon _Range	FL_Avon _Range	1
FL_Big P_e Key	FL_Big P_e Key	FL_Big P_e Key	266
FL_Big P_e Key	FL_Big P_e Key	FL_Big P_e Key	236
FL_Big P_e Key	FL_Big P_e Key	FL_Big P_e Key	175
FL_Big P_e Key	FL_Big P_e Key	FL_Big P_e Key	105
FL_Big P_e Key	FL_Big P_e Key	FL_Big P_e Key	85
FL_Big P_e Key	FL_Big P_e Key	FL_Big P_e Key	65
FL_Big P_e Key	FL_Big P_e Key	FL_Big P_e Key	48
FL_Big P_e Key	FL_Big P_e Key	FL_Big P_e Key	23
FL_Big P_e Key	FL_Big P_e Key	FL_Big P_e Key	22
FL_Big P_e Key	FL_Big P_e Key	FL_Big P_e Key	18
FL_Big P_e Key	FL_Big P_e Key	FL_Big P_e Key	18
FL_Big P_e Key	FL_Big P_e Key	FL_Big P_e Key	17
FL_Big P_e Key	FL_Big P_e Key	FL_Big P_e Key	12
FL_Big P_e Key	FL_Big P_e Key	FL_Big P_e Key	8
FL_Big P_e Key	FL_Big P_e Key	FL_Big P_e Key	7
FL_Big P_e Key	FL_Big P_e Key	FL_Big P_e Key	7
FL_Big P_e Key	FL_Big P_e Key	FL_Big P_e Key	6
FL_Big P_e Key	FL_Big P_e Key	FL_Big P_e Key	4
FL_Big P_e Key	FL_Big P_e Key	FL_Big P_e Key	3
FL_Big P_e Key	FL_Big P_e Key	FL_Big P_e Key	3
FL_Big P_e Key	FL_Big P_e Key	FL_Big P_e Key	3
FL_Big P_e Key	FL_Big P_e Key	FL_Big P_e Key	2
FL_Big P_e Key	FL_Big P_e Key	FL_Big P_e Key	2
FL_Big P_e Key	FL_Big P_e Key	FL_Big P_e Key	1
FL_Big P_e Key	FL_Big P_e Key	FL_Big P_e Key	1
FL_Black_orest	FL_Black_orest	FL_Black_orest	51
FL_Black_orest	FL_Black_orest	FL_Black_orest	35
FL_Black_orest	FL_Black_orest	FL_Black_orest	23
FL_Black_orest	FL_Black_orest	FL_Black_orest	16
FL_Black_orest	FL_Black_orest	FL_Black_orest	16
FL_Black_orest	FL_Black_orest	FL_Black_orest	13
FL_Black_orest	FL_Black_orest	FL_Black_orest	13
FL_Black_orest	FL_Black_orest	FL_Black_orest	13
FL_Black_orest	FL_Black_orest	FL_Black_orest	11
FL_Black_orest	FL_Black_orest	FL_Black_orest	3
FL_Black_orest	FL_Black_orest	FL_Black_orest	3
FL_Black_orest	FL_Black_orest	FL_Black_orest	2
FL_Black_orest	FL_Black_orest	FL_Black_orest	2
FL_Black_orest	FL_Black_orest	FL_Black_orest	2
FL_Black_orest	FL_Black_orest	FL_Black_orest	2
FL_Black_orest	FL_Black_orest	FL_Black_orest	2
FL_Black_orest	FL_Black_orest	FL_Black_orest	2
FL_Black_orest	FL_Black_orest	FL_Black_orest	2
FL_Black_orest	FL_Black_orest	FL_Black_orest	1
FL_Black_orest	FL_Black_orest	FL_Black_orest	1
FL_Black_orest	FL_Black_orest	FL_Black_orest	1
FL_Black_orest	FL_Black_orest	FL_Black_orest	1
FL_Black_orest	FL_Black_orest	FL_Black_orest	1
FL_Black_orest	FL_Black_orest	FL_Black_orest	1
FL_Bok T_Tower	FL_Bok T_Tower	FL_Bok T_Tower	26
FL_Bok T_Tower	FL_Bok T_Tower	FL_Bok T_Tower	13
FL_Bok T_Tower	FL_Bok T_Tower	FL_Bok T_Tower	12
FL_Bok T_Tower	FL_Bok T_Tower	FL_Bok T_Tower	6
FL_Bok T_Tower	FL_Bok T_Tower	FL_Bok T_Tower	4
FL_Bok T_Tower	FL_Bok T_Tower	FL_Bok T_Tower	3
FL_Bok T_Tower	FL_Bok T_Tower	FL_Bok T_Tower	3
FL_Bok T_Tower	FL_Bok T_Tower	FL_Bok T_Tower	3
FL_Bok T_Tower	FL_Bok T_Tower	FL_Bok T_Tower	3
FL_Bok T_Tower	FL_Bok T_Tower	FL_Bok T_Tower	2
FL_Bok T_Tower	FL_Bok T_Tower	FL_Bok T_Tower	2
FL_Bok T_Tower	FL_Bok T_Tower	FL_Bok T_Tower	2
FL_Bok T_Tower	FL_Bok T_Tower	FL_Bok T_Tower	2
FL_Bok T_Tower	FL_Bok T_Tower	FL_Bok T_Tower	2
FL_Bok T_Tower	FL_Bok T_Tower	FL_Bok T_Tower	2
FL_Bok T_Tower	FL_Bok T_Tower	FL_Bok T_Tower	1
FL_Bok T_Tower	FL_Bok T_Tower	FL_Bok T_Tower	1
FL_Bok T_Tower	FL_Bok T_Tower	FL_Bok T_Tower	1
FL_Bok T_Tower	FL_Bok T_Tower	FL_Bok T_Tower	1
FL_Bok T_Tower	FL_Bok T_Tower	FL_Bok T_Tower	1
FL_Breva_South	FL_Breva_South	FL_Breva_South	613
FL_Breva_South	FL_Breva_South	FL_Breva_South	150
FL_Breva_South	FL_Breva_South	FL_Breva_South	99
FL_Breva_South	FL_Breva_South	FL_Breva_South	51
FL_Breva_South	FL_Breva_South	FL_Breva_South	42
FL_Breva_South	FL_Breva_South	FL_Breva_South	25
FL_Breva_South	FL_Breva_South	FL_Breva_South	23
FL_Breva_South	FL_Breva_South	FL_Breva_South	12
FL_Breva_South	FL_Breva_South	FL_Breva_South	12
FL_Breva_South	FL_Breva_South	FL_Breva_South	10
FL_Breva_South	FL_Breva_South	FL_Breva_South	10
FL_Breva_South	FL_Breva_South	FL_Breva_South	8
FL_Breva_South	FL_Breva_South	FL_Breva_South	6
FL_Breva_South	FL_Breva_South	FL_Breva_South	5
FL_Breva_South	FL_Breva_South	FL_Breva_South	5
FL_Breva_South	FL_Breva_South	FL_Breva_South	3
FL_Breva_South	FL_Breva_South	FL_Breva_South	3
FL_Breva_South	FL_Breva_South	FL_Breva_South	2
FL_Breva_South	FL_Breva_South	FL_Breva_South	2
FL_Breva_South	FL_Breva_South	FL_Breva_South	2
FL_Breva_South	FL_Breva_South	FL_Breva_South	2
FL_Breva_South	FL_Breva_South	FL_Breva_South	1
FL_Breva_South	FL_Breva_South	FL_Breva_South	1
FL_Breva_South	FL_Breva_South	FL_Breva_South	1
FL_Breva_South	FL_Breva_South	FL_Breva_South	1
FL_Breva_South	FL_Breva_South	FL_Breva_South	1
FL_Breva_South	FL_Breva_South	FL_Breva_South	1
FL_Breva_South	FL_Breva_South	FL_Breva_South	1
FL_Browa_North	FL_Browa_North	FL_Browa_North	43
FL_Browa_North	FL_Browa_North	FL_Browa_North	40
FL_Browa_North	FL_Browa_North	FL_Browa_North	33
FL_Browa_North	FL_Browa_North	FL_Browa_North	32
FL_Browa_North	FL_Browa_North	FL_Browa_North	18
FL_Browa_North	FL_Browa_North	FL_Browa_North	15
FL_Browa_North	FL_Browa_North	FL_Browa_North	15
FL_Browa_North	FL_Browa_North	FL_Browa_North	10
FL_Browa_North	FL_Browa_North	FL_Browa_North	9
FL_Browa_North	FL_Browa_North	FL_Browa_North	9
FL_Browa_North	FL_Browa_North	FL_Browa_North	8
FL_Browa_North	FL_Browa_North	FL_Browa_North	7
FL_Browa_North	FL_Browa_North	FL_Browa_North	6
FL_Browa_North	FL_Browa_North	FL_Browa_North	6
FL_Browa_North	FL_Browa_North	FL_Browa_North	5
FL_Browa_North	FL_Browa_North	FL_Browa_North	4
FL_Browa_North	FL_Browa_North	FL_Browa_North	3
FL_Browa_North	FL_Browa_North	FL_Browa_North	3
FL_Browa_North	FL_Browa_North	FL_Browa_North	2
FL_Browa_North	FL_Browa_North	FL_Browa_North	2
FL_Browa_North	FL_Browa_North	FL_Browa_North	2
FL_Browa_North	FL_Browa_North	FL_Browa_North	2
FL_Browa_North	FL_Browa_North	FL_Browa_North	2
FL_Browa_North	FL_Browa_North	FL_Browa_North	1
FL_Browa_North	FL_Browa_North	FL_Browa_North	1
FL_Browa_North	FL_Browa_North	FL_Browa_North	1
FL_Browa_North	FL_Browa_North	FL_Browa_North	1
FL_Browa_North	FL_Browa_North	FL_Browa_North	1
FL_Browa_North	FL_Browa_North	FL_Browa_North	1
FL_Browa_North	FL_Browa_North	FL_Browa_North	1
FL_Browa_North	FL_Browa_North	FL_Browa_North	1
FL_Browa_North	FL_Browa_North	FL_Browa_North	1
FL_Browa_South	FL_Browa_South	FL_Browa_South	109
FL_Browa_South	FL_Browa_South	FL_Browa_South	50
FL_Browa_South	FL_Browa_South	FL_Browa_South	40
FL_Browa_South	FL_Browa_South	FL_Browa_South	25
FL_Browa_South	FL_Browa_South	FL_Browa_South	25
FL_Browa_South	FL_Browa_South	FL_Browa_South	21
FL_Browa_South	FL_Browa_South	FL_Browa_South	17
FL_Browa_South	FL_Browa_South	FL_Browa_South	16
FL_Browa_South	FL_Browa_South	FL_Browa_South	14
FL_Browa_South	FL_Browa_South	FL_Browa_South	13
FL_Browa_South	FL_Browa_South	FL_Browa_South	11
FL_Browa_South	FL_Browa_South	FL_Browa_South	11
FL_Browa_South	FL_Browa_South	FL_Browa_South	9
FL_Browa_South	FL_Browa_South	FL_Browa_South	8
FL_Browa_South	FL_Browa_South	FL_Browa_South	8
FL_Browa_South	FL_Browa_South	FL_Browa_South	6
FL_Browa_South	FL_Browa_South	FL_Browa_South	5
FL_Browa_South	FL_Browa_South	FL_Browa_South	5
FL_Browa_South	FL_Browa_South	FL_Browa_South	4
FL_Browa_South	FL_Browa_South	FL_Browa_South	4
FL_Browa_South	FL_Browa_South	FL_Browa_South	4
FL_Browa_South	FL_Browa_South	FL_Browa_South	4
FL_Browa_South	FL_Browa_South	FL_Browa_South	3
FL_Browa_South	FL_Browa_South	FL_Browa_South	2
FL_Browa_South	FL_Browa_South	FL_Browa_South	2
FL_Browa_South	FL_Browa_South	FL_Browa_South	2
FL_Browa_South	FL_Browa_South	FL_Browa_South	2
FL_Browa_South	FL_Browa_South	FL_Browa_South	2
FL_Browa_South	FL_Browa_South	FL_Browa_South	2
FL_Browa_South	FL_Browa_South	FL_Browa_South	1
FL_Browa_South	FL_Browa_South	FL_Browa_South	1
FL_Browa_South	FL_Browa_South	FL_Browa_South	1
FL_Browa_South	FL_Browa_South	FL_Browa_South	1
FL_Browa_South	FL_Browa_South	FL_Browa_South	1
FL_Browa_South	FL_Browa_South	FL_Browa_South	1
FL_Browa_South	FL_Browa_South	FL_Browa_South	1
FL_Browa_South	FL_Browa_South	FL_Browa_South	1
FL_Browa_South	FL_Browa_South	FL_Browa_South	1
FL_Bull _Creek	FL_Bull _Creek	FL_Bull _Creek	165
FL_Bull _Creek	FL_Bull _Creek	FL_Bull _Creek	110
FL_Bull _Creek	FL_Bull _Creek	FL_Bull _Creek	62
FL_Bull _Creek	FL_Bull _Creek	FL_Bull _Creek	56
FL_Bull _Creek	FL_Bull _Creek	FL_Bull _Creek	46
FL_Bull _Creek	FL_Bull _Creek	FL_Bull _Creek	34
FL_Bull _Creek	FL_Bull _Creek	FL_Bull _Creek	29
FL_Bull _Creek	FL_Bull _Creek	FL_Bull _Creek	24
FL_Bull _Creek	FL_Bull _Creek	FL_Bull _Creek	21
FL_Bull _Creek	FL_Bull _Creek	FL_Bull _Creek	20
FL_Bull _Creek	FL_Bull _Creek	FL_Bull _Creek	17
FL_Bull _Creek	FL_Bull _Creek	FL_Bull _Creek	17
FL_Bull _Creek	FL_Bull _Creek	FL_Bull _Creek	13
FL_Bull _Creek	FL_Bull _Creek	FL_Bull _Creek	12
FL_Bull _Creek	FL_Bull _Creek	FL_Bull _Creek	12
FL_Bull _Creek	FL_Bull _Creek	FL_Bull _Creek	11
FL_Bull _Creek	FL_Bull _Creek	FL_Bull _Creek	10
FL_Bull _Creek	FL_Bull _Creek	FL_Bull _Creek	10
FL_Bull _Creek	FL_Bull _Creek	FL_Bull _Creek	10
FL_Bull _Creek	FL_Bull _Creek	FL_Bull _Creek	8
FL_Bull _Creek	FL_Bull _Creek	FL_Bull _Creek	8
FL_Bull _Creek	FL_Bull _Creek	FL_Bull _Creek	7
FL_Bull _Creek	FL_Bull _Creek	FL_Bull _Creek	6
FL_Bull _Creek	FL_Bull _Creek	FL_Bull _Creek	6
FL_Bull _Creek	FL_Bull _Creek	FL_Bull _Creek	5
FL_Bull _Creek	FL_Bull _Creek	FL_Bull _Creek	5
[truncated: 11,974 more rows]
