# Supplementary material for: A general pattern of the species abundance distribution
Source: PeerJ. 2018 Nov 13;6:e5928. doi: 10.7717/peerj.5928 (PMC6238767; doi:10.7717/peerj.5928)
Supplement: Supplemental Information 2 — A dataset (named “mcdb”) used to obtain the frequency of SADs. The detail information can be found in appendixes of Baldridge et al. (2016a) and Baldridge et al. (2016b). [file peerj-06-5928-s002.xlsx]

## Sheet: mcdb_obs
Sample ID	Station ID	BioDataTaxonName	Abundance
1008	1008	1008	79
1008	1008	1008	78
1008	1008	1008	59
1008	1008	1008	52
1008	1008	1008	50
1008	1008	1008	47
1008	1008	1008	22
1008	1008	1008	20
1008	1008	1008	18
1008	1008	1008	12
1008	1008	1008	9
1008	1008	1008	6
1008	1008	1008	5
1008	1008	1008	4
1008	1008	1008	2
1009	1009	1009	77
1009	1009	1009	45
1009	1009	1009	17
1009	1009	1009	16
1009	1009	1009	16
1009	1009	1009	12
1009	1009	1009	11
1009	1009	1009	10
1009	1009	1009	4
1009	1009	1009	3
1009	1009	1009	3
1009	1009	1009	3
1009	1009	1009	3
1009	1009	1009	2
1009	1009	1009	1
1009	1009	1009	1
1010	1010	1010	79
1010	1010	1010	31
1010	1010	1010	16
1010	1010	1010	11
1010	1010	1010	11
1010	1010	1010	10
1010	1010	1010	8
1010	1010	1010	5
1010	1010	1010	4
1010	1010	1010	4
1010	1010	1010	3
1010	1010	1010	3
1010	1010	1010	2
1010	1010	1010	1
1010	1010	1010	1
1010	1010	1010	1
1011	1011	1011	42
1011	1011	1011	29
1011	1011	1011	27
1011	1011	1011	12
1011	1011	1011	6
1011	1011	1011	2
1011	1011	1011	2
1011	1011	1011	1
1011	1011	1011	1
1011	1011	1011	1
1012	1012	1012	81
1012	1012	1012	74
1012	1012	1012	50
1012	1012	1012	44
1012	1012	1012	28
1012	1012	1012	14
1012	1012	1012	13
1012	1012	1012	12
1012	1012	1012	12
1012	1012	1012	9
1012	1012	1012	7
1012	1012	1012	6
1012	1012	1012	3
1012	1012	1012	3
1012	1012	1012	2
1012	1012	1012	2
1012	1012	1012	1
1013	1013	1013	910
1013	1013	1013	195
1013	1013	1013	98
1013	1013	1013	33
1013	1013	1013	29
1013	1013	1013	27
1013	1013	1013	17
1013	1013	1013	16
1013	1013	1013	12
1013	1013	1013	5
1013	1013	1013	4
1013	1013	1013	4
1013	1013	1013	2
1013	1013	1013	1
1013	1013	1013	1
1013	1013	1013	1
1014	1014	1014	1074
1014	1014	1014	261
1014	1014	1014	182
1014	1014	1014	83
1014	1014	1014	74
1014	1014	1014	37
1014	1014	1014	24
1014	1014	1014	22
1014	1014	1014	18
1014	1014	1014	18
1014	1014	1014	15
1014	1014	1014	8
1014	1014	1014	4
1014	1014	1014	1
1014	1014	1014	1
1015	1015	1015	1293
1015	1015	1015	336
1015	1015	1015	145
1015	1015	1015	74
1015	1015	1015	43
1015	1015	1015	35
1015	1015	1015	34
1015	1015	1015	26
1015	1015	1015	23
1015	1015	1015	14
1015	1015	1015	8
1015	1015	1015	7
1015	1015	1015	4
1015	1015	1015	1
1016	1016	1016	1158
1016	1016	1016	208
1016	1016	1016	137
1016	1016	1016	111
1016	1016	1016	80
1016	1016	1016	52
1016	1016	1016	18
1016	1016	1016	18
1016	1016	1016	12
1016	1016	1016	11
1016	1016	1016	10
1016	1016	1016	8
1017	1017	1017	1047
1017	1017	1017	350
1017	1017	1017	281
1017	1017	1017	87
1017	1017	1017	64
1017	1017	1017	29
1017	1017	1017	25
1017	1017	1017	24
1017	1017	1017	24
1017	1017	1017	21
1017	1017	1017	16
1017	1017	1017	13
1017	1017	1017	8
1017	1017	1017	8
1017	1017	1017	4
1017	1017	1017	3
1017	1017	1017	2
1017	1017	1017	1
1018	1018	1018	1045
1018	1018	1018	336
1018	1018	1018	251
1018	1018	1018	109
1018	1018	1018	87
1018	1018	1018	36
1018	1018	1018	35
1018	1018	1018	30
1018	1018	1018	25
1018	1018	1018	25
1018	1018	1018	15
1018	1018	1018	5
1018	1018	1018	5
1018	1018	1018	2
1018	1018	1018	1
1018	1018	1018	1
1018	1018	1018	1
1018	1018	1018	1
1018	1018	1018	1
1018	1018	1018	1
1019	1019	1019	1261
1019	1019	1019	300
1019	1019	1019	174
1019	1019	1019	127
1019	1019	1019	79
1019	1019	1019	57
1019	1019	1019	26
1019	1019	1019	10
1019	1019	1019	9
1019	1019	1019	9
1019	1019	1019	7
1019	1019	1019	4
1019	1019	1019	2
1019	1019	1019	2
1019	1019	1019	1
1019	1019	1019	1
1019	1019	1019	1
1020	1020	1020	1012
1020	1020	1020	310
1020	1020	1020	242
1020	1020	1020	209
1020	1020	1020	108
1020	1020	1020	53
1020	1020	1020	30
1020	1020	1020	29
1020	1020	1020	21
1020	1020	1020	13
1020	1020	1020	11
1020	1020	1020	8
1020	1020	1020	2
1020	1020	1020	1
1020	1020	1020	1
1021	1021	1021	13
1021	1021	1021	13
1021	1021	1021	12
1021	1021	1021	9
1021	1021	1021	8
1021	1021	1021	8
1021	1021	1021	7
1021	1021	1021	4
1021	1021	1021	1
1021	1021	1021	1
1021	1021	1021	1
1022	1022	1022	77
1022	1022	1022	46
1022	1022	1022	34
1022	1022	1022	24
1022	1022	1022	22
1022	1022	1022	13
1022	1022	1022	10
1022	1022	1022	9
1022	1022	1022	5
1022	1022	1022	5
1022	1022	1022	1
1180	1180	1180	30
1180	1180	1180	17
1180	1180	1180	7
1180	1180	1180	5
1180	1180	1180	2
1180	1180	1180	2
1180	1180	1180	1
1180	1180	1180	1
1180	1180	1180	1
1180	1180	1180	1
1180	1180	1180	1
1197	1197	1197	74
1197	1197	1197	33
1197	1197	1197	11
1197	1197	1197	8
1197	1197	1197	7
1197	1197	1197	5
1197	1197	1197	2
1197	1197	1197	2
1197	1197	1197	2
1197	1197	1197	1
1197	1197	1197	1
1198	1198	1198	38
1198	1198	1198	16
1198	1198	1198	16
1198	1198	1198	14
1198	1198	1198	13
1198	1198	1198	8
1198	1198	1198	7
1198	1198	1198	7
1198	1198	1198	6
1198	1198	1198	5
1198	1198	1198	4
1198	1198	1198	3
1198	1198	1198	2
1198	1198	1198	2
1198	1198	1198	1
1198	1198	1198	1
1198	1198	1198	1
1198	1198	1198	1
1200	1200	1200	28
1200	1200	1200	24
1200	1200	1200	14
1200	1200	1200	13
1200	1200	1200	11
1200	1200	1200	6
1200	1200	1200	6
1200	1200	1200	5
1200	1200	1200	4
1200	1200	1200	4
1200	1200	1200	3
1200	1200	1200	3
1200	1200	1200	3
1200	1200	1200	3
1200	1200	1200	2
1200	1200	1200	2
1200	1200	1200	2
1200	1200	1200	2
1200	1200	1200	2
1200	1200	1200	2
1200	1200	1200	1
1201	1201	1201	80
1201	1201	1201	33
1201	1201	1201	20
1201	1201	1201	17
1201	1201	1201	13
1201	1201	1201	11
1201	1201	1201	8
1201	1201	1201	7
1201	1201	1201	7
1201	1201	1201	6
1201	1201	1201	6
1201	1201	1201	3
1201	1201	1201	3
1201	1201	1201	2
1201	1201	1201	2
1201	1201	1201	2
1201	1201	1201	1
1201	1201	1201	1
1208	1208	1208	337
1208	1208	1208	243
1208	1208	1208	148
1208	1208	1208	121
1208	1208	1208	121
1208	1208	1208	108
1208	1208	1208	108
1208	1208	1208	54
1208	1208	1208	27
1208	1208	1208	27
1208	1208	1208	13
1208	1208	1208	13
1208	1208	1208	13
1208	1208	1208	13
1208	1208	1208	1
1208	1208	1208	1
1208	1208	1208	1
1208	1208	1208	1
1210	1210	1210	23
1210	1210	1210	11
1210	1210	1210	11
1210	1210	1210	5
1210	1210	1210	4
1210	1210	1210	2
1210	1210	1210	2
1210	1210	1210	2
1210	1210	1210	1
1210	1210	1210	1
1230	1230	1230	882
1230	1230	1230	787
1230	1230	1230	514
1230	1230	1230	460
1230	1230	1230	278
1230	1230	1230	242
1230	1230	1230	173
1230	1230	1230	76
1230	1230	1230	41
1230	1230	1230	31
1230	1230	1230	31
1230	1230	1230	13
1230	1230	1230	13
1232	1232	1232	5
1232	1232	1232	5
1232	1232	1232	1
1232	1232	1232	1
1232	1232	1232	1
1232	1232	1232	1
1232	1232	1232	1
1232	1232	1232	1
1232	1232	1232	1
1232	1232	1232	1
1232	1232	1232	1
1240	1240	1240	151
1240	1240	1240	128
1240	1240	1240	57
1240	1240	1240	18
1240	1240	1240	13
1240	1240	1240	13
1240	1240	1240	7
1240	1240	1240	2
1240	1240	1240	2
1240	1240	1240	2
1240	1240	1240	1
1240	1240	1240	1
1242	1242	1242	910
1242	1242	1242	600
1242	1242	1242	58
1242	1242	1242	43
1242	1242	1242	10
1242	1242	1242	7
1242	1242	1242	6
1242	1242	1242	4
1242	1242	1242	2
1242	1242	1242	2
1242	1242	1242	2
1242	1242	1242	2
1242	1242	1242	1
1250	1250	1250	153
1250	1250	1250	77
1250	1250	1250	75
1250	1250	1250	62
1250	1250	1250	55
1250	1250	1250	45
1250	1250	1250	29
1250	1250	1250	29
1250	1250	1250	27
1250	1250	1250	23
1250	1250	1250	17
1250	1250	1250	16
1250	1250	1250	13
1250	1250	1250	11
1251	1251	1251	153
1251	1251	1251	136
1251	1251	1251	78
1251	1251	1251	46
1251	1251	1251	11
1251	1251	1251	5
1251	1251	1251	5
1251	1251	1251	5
1251	1251	1251	2
1251	1251	1251	2
1251	1251	1251	1
1251	1251	1251	1
1258	1258	1258	51
1258	1258	1258	25
1258	1258	1258	23
1258	1258	1258	22
1258	1258	1258	17
1258	1258	1258	7
1258	1258	1258	5
1258	1258	1258	4
1258	1258	1258	3
1258	1258	1258	2
1258	1258	1258	2
1262	1262	1262	1366
1262	1262	1262	550
1262	1262	1262	420
1262	1262	1262	415
1262	1262	1262	408
1262	1262	1262	408
1262	1262	1262	319
1262	1262	1262	263
1262	1262	1262	225
1262	1262	1262	189
1262	1262	1262	177
1262	1262	1262	97
1262	1262	1262	78
1263	1263	1263	895
1263	1263	1263	134
1263	1263	1263	76
1263	1263	1263	35
1263	1263	1263	19
1263	1263	1263	17
1263	1263	1263	11
1263	1263	1263	9
1263	1263	1263	9
1263	1263	1263	1
1263	1263	1263	1
1264	1264	1264	751
1264	1264	1264	282
1264	1264	1264	210
1264	1264	1264	104
1264	1264	1264	35
1264	1264	1264	22
1264	1264	1264	18
1264	1264	1264	6
1264	1264	1264	3
1264	1264	1264	1
1264	1264	1264	1
1264	1264	1264	1
1264	1264	1264	1
1265	1265	1265	102
1265	1265	1265	71
1265	1265	1265	32
1265	1265	1265	30
1265	1265	1265	17
1265	1265	1265	17
1265	1265	1265	13
1265	1265	1265	11
1265	1265	1265	8
1265	1265	1265	3
1266	1266	1266	47
1266	1266	1266	46
1266	1266	1266	43
1266	1266	1266	35
1266	1266	1266	33
1266	1266	1266	32
1266	1266	1266	23
1266	1266	1266	21
1266	1266	1266	18
1266	1266	1266	12
1266	1266	1266	11
1266	1266	1266	8
1266	1266	1266	7
1267	1267	1267	195
1267	1267	1267	65
1267	1267	1267	59
1267	1267	1267	54
1267	1267	1267	52
1267	1267	1267	41
1267	1267	1267	39
1267	1267	1267	38
1267	1267	1267	36
1267	1267	1267	15
1267	1267	1267	12
1268	1268	1268	204
1268	1268	1268	97
1268	1268	1268	86
1268	1268	1268	79
1268	1268	1268	36
1268	1268	1268	15
1268	1268	1268	10
1268	1268	1268	10
1268	1268	1268	8
1268	1268	1268	3
1269	1269	1269	133
1269	1269	1269	128
1269	1269	1269	110
1269	1269	1269	79
1269	1269	1269	28
1269	1269	1269	27
1269	1269	1269	23
1269	1269	1269	17
1269	1269	1269	15
1269	1269	1269	7
1271	1271	1271	249
1271	1271	1271	221
1271	1271	1271	215
1271	1271	1271	177
1271	1271	1271	130
1271	1271	1271	42
1271	1271	1271	34
1271	1271	1271	24
1271	1271	1271	14
1271	1271	1271	11
1271	1271	1271	9
1271	1271	1271	6
1271	1271	1271	2
1271	1271	1271	2
1271	1271	1271	1
1271	1271	1271	1
1272	1272	1272	298
1272	1272	1272	261
1272	1272	1272	217
1272	1272	1272	213
1272	1272	1272	178
1272	1272	1272	65
1272	1272	1272	61
1272	1272	1272	16
1272	1272	1272	12
1272	1272	1272	9
1272	1272	1272	5
1272	1272	1272	3
1272	1272	1272	2
1272	1272	1272	2
1274	1274	1274	63
1274	1274	1274	43
1274	1274	1274	32
1274	1274	1274	24
1274	1274	1274	23
1274	1274	1274	22
1274	1274	1274	21
1274	1274	1274	12
1274	1274	1274	3
1274	1274	1274	3
1274	1274	1274	2
1275	1275	1275	41
1275	1275	1275	19
1275	1275	1275	17
1275	1275	1275	17
1275	1275	1275	13
1275	1275	1275	8
1275	1275	1275	5
1275	1275	1275	2
1275	1275	1275	2
1275	1275	1275	2
1278	1278	1278	18
1278	1278	1278	6
1278	1278	1278	6
1278	1278	1278	5
1278	1278	1278	4
1278	1278	1278	2
1278	1278	1278	2
1278	1278	1278	2
1278	1278	1278	1
1278	1278	1278	1
1288	1288	1288	362
1288	1288	1288	28
1288	1288	1288	23
1288	1288	1288	18
1288	1288	1288	14
1288	1288	1288	12
1288	1288	1288	7
1288	1288	1288	4
1288	1288	1288	3
1288	1288	1288	2
1288	1288	1288	1
1288	1288	1288	1
1288	1288	1288	1
1288	1288	1288	1
1289	1289	1289	331
1289	1289	1289	17
1289	1289	1289	11
1289	1289	1289	5
1289	1289	1289	5
1289	1289	1289	4
1289	1289	1289	4
1289	1289	1289	3
1289	1289	1289	3
1289	1289	1289	2
1289	1289	1289	2
1291	1291	1291	82
1291	1291	1291	41
1291	1291	1291	17
1291	1291	1291	9
1291	1291	1291	9
1291	1291	1291	6
1291	1291	1291	5
1291	1291	1291	4
1291	1291	1291	2
1291	1291	1291	1
1294	1294	1294	56
1294	1294	1294	39
1294	1294	1294	18
1294	1294	1294	7
1294	1294	1294	6
1294	1294	1294	3
1294	1294	1294	3
1294	1294	1294	2
1294	1294	1294	2
1294	1294	1294	1
1294	1294	1294	1
1299	1299	1299	221
1299	1299	1299	143
1299	1299	1299	99
1299	1299	1299	75
1299	1299	1299	75
1299	1299	1299	51
1299	1299	1299	38
1299	1299	1299	30
1299	1299	1299	28
1299	1299	1299	27
1299	1299	1299	22
1299	1299	1299	9
1299	1299	1299	9
1299	1299	1299	8
1299	1299	1299	5
1299	1299	1299	1
1299	1299	1299	1
1299	1299	1299	1
1307	1307	1307	465
1307	1307	1307	390
1307	1307	1307	370
1307	1307	1307	256
1307	1307	1307	250
1307	1307	1307	233
1307	1307	1307	151
1307	1307	1307	149
1307	1307	1307	36
1307	1307	1307	9
1307	1307	1307	4
1308	1308	1308	467
1308	1308	1308	290
1308	1308	1308	111
1308	1308	1308	58
1308	1308	1308	58
1308	1308	1308	24
1308	1308	1308	23
1308	1308	1308	16
1308	1308	1308	15
1308	1308	1308	3
1320	1320	1320	127
1320	1320	1320	59
1320	1320	1320	48
1320	1320	1320	24
1320	1320	1320	22
1320	1320	1320	18
1320	1320	1320	12
1320	1320	1320	11
1320	1320	1320	10
1320	1320	1320	7
1320	1320	1320	6
1320	1320	1320	5
1320	1320	1320	4
1320	1320	1320	4
1320	1320	1320	4
1320	1320	1320	3
1320	1320	1320	2
1320	1320	1320	2
1320	1320	1320	1
1321	1321	1321	483
1321	1321	1321	259
1321	1321	1321	235
1321	1321	1321	38
1321	1321	1321	32
1321	1321	1321	3
1321	1321	1321	2
1321	1321	1321	2
1321	1321	1321	1
1321	1321	1321	1
1327	1327	1327	254
1327	1327	1327	202
1327	1327	1327	137
1327	1327	1327	31
1327	1327	1327	9
1327	1327	1327	8
1327	1327	1327	2
1327	1327	1327	1
1327	1327	1327	1
1327	1327	1327	1
1328	1328	1328	33
1328	1328	1328	24
1328	1328	1328	21
1328	1328	1328	11
1328	1328	1328	3
1328	1328	1328	3
1328	1328	1328	1
1328	1328	1328	1
1328	1328	1328	1
1328	1328	1328	1
1338	1338	1338	144
1338	1338	1338	41
1338	1338	1338	10
1338	1338	1338	4
1338	1338	1338	2
1338	1338	1338	2
1338	1338	1338	2
1338	1338	1338	2
1338	1338	1338	1
1338	1338	1338	1
1341	1341	1341	152
1341	1341	1341	92
1341	1341	1341	42
1341	1341	1341	27
1341	1341	1341	13
1341	1341	1341	7
1341	1341	1341	4
1341	1341	1341	3
1341	1341	1341	2
1341	1341	1341	1
1341	1341	1341	1
1342	1342	1342	213
1342	1342	1342	166
1342	1342	1342	57
1342	1342	1342	21
1342	1342	1342	14
1342	1342	1342	10
1342	1342	1342	5
1342	1342	1342	3
1342	1342	1342	3
1342	1342	1342	2
1342	1342	1342	1
1342	1342	1342	1
1343	1343	1343	248
1343	1343	1343	158
1343	1343	1343	65
1343	1343	1343	53
1343	1343	1343	37
1343	1343	1343	24
1343	1343	1343	13
1343	1343	1343	6
1343	1343	1343	5
1343	1343	1343	3
1343	1343	1343	3
1343	1343	1343	2
1343	1343	1343	1
1343	1343	1343	1
1344	1344	1344	34
1344	1344	1344	16
1344	1344	1344	9
1344	1344	1344	9
1344	1344	1344	8
1344	1344	1344	6
1344	1344	1344	6
1344	1344	1344	5
1344	1344	1344	4
1344	1344	1344	4
1344	1344	1344	3
1344	1344	1344	3
1344	1344	1344	3
1344	1344	1344	2
1344	1344	1344	1
1344	1344	1344	1
1344	1344	1344	1
1344	1344	1344	1
1344	1344	1344	1
1344	1344	1344	1
1347	1347	1347	325
1347	1347	1347	93
1347	1347	1347	78
1347	1347	1347	36
1347	1347	1347	36
1347	1347	1347	36
1347	1347	1347	29
1347	1347	1347	20
1347	1347	1347	20
1347	1347	1347	15
1347	1347	1347	15
1347	1347	1347	13
1347	1347	1347	5
1347	1347	1347	4
1347	1347	1347	2
1347	1347	1347	2
1347	1347	1347	2
1348	1348	1348	23
1348	1348	1348	20
1348	1348	1348	14
1348	1348	1348	10
1348	1348	1348	7
1348	1348	1348	6
1348	1348	1348	5
1348	1348	1348	5
1348	1348	1348	4
1348	1348	1348	3
1348	1348	1348	2
1348	1348	1348	1
1348	1348	1348	1
1348	1348	1348	1
1353	1353	1353	10
1353	1353	1353	9
1353	1353	1353	6
1353	1353	1353	4
1353	1353	1353	4
1353	1353	1353	2
1353	1353	1353	2
1353	1353	1353	2
1353	1353	1353	2
1353	1353	1353	1
1356	1356	1356	11
1356	1356	1356	9
1356	1356	1356	5
1356	1356	1356	4
1356	1356	1356	4
1356	1356	1356	4
1356	1356	1356	3
1356	1356	1356	3
1356	1356	1356	2
1356	1356	1356	2
1356	1356	1356	1
1356	1356	1356	1
1356	1356	1356	1
1357	1357	1357	462
1357	1357	1357	320
1357	1357	1357	287
1357	1357	1357	217
1357	1357	1357	139
1357	1357	1357	136
1357	1357	1357	26
1357	1357	1357	18
1357	1357	1357	11
1357	1357	1357	10
1357	1357	1357	9
1357	1357	1357	5
1357	1357	1357	1
1357	1357	1357	1
1358	1358	1358	587
1358	1358	1358	130
1358	1358	1358	129
1358	1358	1358	84
1358	1358	1358	53
1358	1358	1358	20
1358	1358	1358	15
1358	1358	1358	4
1358	1358	1358	4
1358	1358	1358	3
1358	1358	1358	3
1358	1358	1358	3
1358	1358	1358	1
1359	1359	1359	727
1359	1359	1359	65
1359	1359	1359	61
1359	1359	1359	10
1359	1359	1359	8
1359	1359	1359	7
1359	1359	1359	6
1359	1359	1359	4
1359	1359	1359	3
1359	1359	1359	2
1359	1359	1359	2
1359	1359	1359	2
1359	1359	1359	2
1359	1359	1359	1
1361	1361	1361	3598
1361	1361	1361	2538
1361	1361	1361	1711
1361	1361	1361	893
1361	1361	1361	656
1361	1361	1361	262
1361	1361	1361	106
1361	1361	1361	91
1361	1361	1361	82
1361	1361	1361	43
1361	1361	1361	18
1361	1361	1361	16
1361	1361	1361	13
1361	1361	1361	11
1361	1361	1361	8
1361	1361	1361	7
1361	1361	1361	6
1361	1361	1361	5
1361	1361	1361	5
1361	1361	1361	4
1361	1361	1361	4
1361	1361	1361	3
1361	1361	1361	3
1361	1361	1361	2
1397	1397	1397	297
1397	1397	1397	93
1397	1397	1397	63
1397	1397	1397	41
1397	1397	1397	7
1397	1397	1397	7
1397	1397	1397	3
1397	1397	1397	2
1397	1397	1397	2
1397	1397	1397	2
1397	1397	1397	1
1397	1397	1397	1
1417	1417	1417	173
1417	1417	1417	115
1417	1417	1417	48
1417	1417	1417	46
1417	1417	1417	23
1417	1417	1417	12
1417	1417	1417	12
1417	1417	1417	6
1417	1417	1417	4
1417	1417	1417	1
1417	1417	1417	1
1417	1417	1417	1
1417	1417	1417	1
1419	1419	1419	15
1419	1419	1419	12
1419	1419	1419	2
1419	1419	1419	2
1419	1419	1419	2
1419	1419	1419	2
1419	1419	1419	1
1419	1419	1419	1
1419	1419	1419	1
1419	1419	1419	1
1465	1465	1465	396
1465	1465	1465	319
1465	1465	1465	257
1465	1465	1465	134
1465	1465	1465	66
1465	1465	1465	42
1465	1465	1465	29
1465	1465	1465	29
1465	1465	1465	29
1465	1465	1465	10
1465	1465	1465	6
1465	1465	1465	3
1465	1465	1465	1
1465	1465	1465	1
1466	1466	1466	110
1466	1466	1466	86
1466	1466	1466	71
1466	1466	1466	57
1466	1466	1466	44
1466	1466	1466	15
1466	1466	1466	14
1466	1466	1466	5
1466	1466	1466	3
1466	1466	1466	1
1467	1467	1467	291
1467	1467	1467	144
1467	1467	1467	140
1467	1467	1467	132
1467	1467	1467	68
1467	1467	1467	47
1467	1467	1467	29
1467	1467	1467	25
1467	1467	1467	15
1467	1467	1467	8
1467	1467	1467	7
1467	1467	1467	2
1467	1467	1467	1
1467	1467	1467	1
1473	1473	1473	78
1473	1473	1473	52
1473	1473	1473	34
1473	1473	1473	7
1473	1473	1473	5
1473	1473	1473	5
1473	1473	1473	1
1473	1473	1473	1
1473	1473	1473	1
1473	1473	1473	1
1486	1486	1486	58
1486	1486	1486	38
1486	1486	1486	38
1486	1486	1486	34
1486	1486	1486	26
1486	1486	1486	8
1486	1486	1486	5
1486	1486	1486	2
1486	1486	1486	2
1486	1486	1486	1
1486	1486	1486	1
1486	1486	1486	1
1486	1486	1486	1
1486	1486	1486	1
1550	1550	1550	31
1550	1550	1550	26
1550	1550	1550	25
1550	1550	1550	25
1550	1550	1550	13
1550	1550	1550	11
1550	1550	1550	9
1550	1550	1550	6
1550	1550	1550	5
1550	1550	1550	1
1581	1581	1581	334
1581	1581	1581	245
1581	1581	1581	74
1581	1581	1581	51
1581	1581	1581	36
1581	1581	1581	30
1581	1581	1581	16
1581	1581	1581	14
1581	1581	1581	9
1581	1581	1581	9
1581	1581	1581	6
1581	1581	1581	5
1611	1611	1611	17
1611	1611	1611	12
1611	1611	1611	9
1611	1611	1611	7
1611	1611	1611	6
1611	1611	1611	5
1611	1611	1611	3
1611	1611	1611	2
1611	1611	1611	2
1611	1611	1611	1
1614	1614	1614	11
1614	1614	1614	10
1614	1614	1614	8
1614	1614	1614	5
1614	1614	1614	4
1614	1614	1614	3
1614	1614	1614	3
1614	1614	1614	1
1614	1614	1614	1
1614	1614	1614	1
1620	1620	1620	206
1620	1620	1620	153
1620	1620	1620	101
1620	1620	1620	30
1620	1620	1620	9
1620	1620	1620	7
1620	1620	1620	3
1620	1620	1620	2
1620	1620	1620	2
1620	1620	1620	1
1620	1620	1620	1
1620	1620	1620	1
1730	1730	1730	1308
1730	1730	1730	37
1730	1730	1730	23
1730	1730	1730	18
1730	1730	1730	6
1730	1730	1730	4
1730	1730	1730	2
1730	1730	1730	2
1730	1730	1730	1
1730	1730	1730	1
1731	1731	1731	181
1731	1731	1731	90
1731	1731	1731	31
1731	1731	1731	22
1731	1731	1731	16
1731	1731	1731	11
1731	1731	1731	8
1731	1731	1731	7
1731	1731	1731	7
1731	1731	1731	7
1731	1731	1731	6
1731	1731	1731	5
1731	1731	1731	4
1731	1731	1731	4
1731	1731	1731	4
1731	1731	1731	3
1731	1731	1731	2
1731	1731	1731	2
1731	1731	1731	1
1731	1731	1731	1
1731	1731	1731	1
1732	1732	1732	156
1732	1732	1732	85
1732	1732	1732	19
1732	1732	1732	15
1732	1732	1732	6
1732	1732	1732	6
1732	1732	1732	6
1732	1732	1732	2
1732	1732	1732	2
1732	1732	1732	2
1732	1732	1732	1
1732	1732	1732	1
1732	1732	1732	1
1732	1732	1732	1
1733	1733	1733	183
1733	1733	1733	97
1733	1733	1733	27
1733	1733	1733	15
1733	1733	1733	14
1733	1733	1733	13
1733	1733	1733	12
1733	1733	1733	9
1733	1733	1733	7
1733	1733	1733	5
1733	1733	1733	4
1733	1733	1733	3
1733	1733	1733	2
1733	1733	1733	1
1734	1734	1734	181
1734	1734	1734	55
1734	1734	1734	14
1734	1734	1734	12
1734	1734	1734	11
1734	1734	1734	6
1734	1734	1734	6
1734	1734	1734	4
1734	1734	1734	4
1734	1734	1734	3
1734	1734	1734	3
1734	1734	1734	2
1734	1734	1734	1
1734	1734	1734	1
1736	1736	1736	21
1736	1736	1736	21
1736	1736	1736	16
1736	1736	1736	14
1736	1736	1736	8
1736	1736	1736	5
1736	1736	1736	5
1736	1736	1736	4
1736	1736	1736	3
1736	1736	1736	2
1736	1736	1736	1
1736	1736	1736	1
1736	1736	1736	1
1736	1736	1736	1
1746	1746	1746	535
1746	1746	1746	77
1746	1746	1746	49
1746	1746	1746	38
1746	1746	1746	17
1746	1746	1746	10
1746	1746	1746	8
1746	1746	1746	4
1746	1746	1746	3
1746	1746	1746	2
1746	1746	1746	1
1746	1746	1746	1
1746	1746	1746	1
1747	1747	1747	252
1747	1747	1747	103
1747	1747	1747	33
1747	1747	1747	18
1747	1747	1747	11
1747	1747	1747	8
1747	1747	1747	6
1747	1747	1747	4
1747	1747	1747	2
1747	1747	1747	1
1748	1748	1748	296
1748	1748	1748	88
1748	1748	1748	36
1748	1748	1748	33
1748	1748	1748	13
1748	1748	1748	9
1748	1748	1748	7
1748	1748	1748	6
1748	1748	1748	5
1748	1748	1748	4
1748	1748	1748	2
1751	1751	1751	68
1751	1751	1751	38
1751	1751	1751	18
1751	1751	1751	13
1751	1751	1751	6
1751	1751	1751	6
1751	1751	1751	5
1751	1751	1751	3
1751	1751	1751	2
1751	1751	1751	1
1790	1790	1790	1890
1790	1790	1790	1802
1790	1790	1790	645
1790	1790	1790	525
1790	1790	1790	471
1790	1790	1790	296
1790	1790	1790	72
1790	1790	1790	37
1790	1790	1790	31
1790	1790	1790	29
1790	1790	1790	9
1790	1790	1790	9
1790	1790	1790	8
1790	1790	1790	5
1790	1790	1790	2
1790	1790	1790	1
1790	1790	1790	1
1790	1790	1790	1
1790	1790	1790	1
1791	1791	1791	244
1791	1791	1791	151
1791	1791	1791	123
1791	1791	1791	117
1791	1791	1791	95
1791	1791	1791	91
1791	1791	1791	59
1791	1791	1791	45
1791	1791	1791	38
1791	1791	1791	38
1791	1791	1791	35
1791	1791	1791	33
1791	1791	1791	26
1791	1791	1791	25
1791	1791	1791	13
1791	1791	1791	12
1791	1791	1791	11
1791	1791	1791	4
1791	1791	1791	3
1791	1791	1791	2
1791	1791	1791	1
1791	1791	1791	1
1791	1791	1791	1
1791	1791	1791	1
1812	1812	1812	33
1812	1812	1812	22
1812	1812	1812	7
1812	1812	1812	6
1812	1812	1812	3
1812	1812	1812	2
1812	1812	1812	2
1812	1812	1812	1
1812	1812	1812	1
1812	1812	1812	1
1814	1814	1814	1466
1814	1814	1814	869
1814	1814	1814	809
1814	1814	1814	742
1814	1814	1814	647
1814	1814	1814	447
1814	1814	1814	409
1814	1814	1814	352
1814	1814	1814	231
1814	1814	1814	230
1814	1814	1814	153
1814	1814	1814	145
1814	1814	1814	134
1814	1814	1814	133
1814	1814	1814	127
1814	1814	1814	121
1814	1814	1814	66
1814	1814	1814	36
1814	1814	1814	31
1814	1814	1814	29
1814	1814	1814	28
1814	1814	1814	13
1814	1814	1814	1
1820	1820	1820	133
1820	1820	1820	45
1820	1820	1820	21
1820	1820	1820	20
1820	1820	1820	19
1820	1820	1820	12
1820	1820	1820	12
1820	1820	1820	9
1820	1820	1820	8
1820	1820	1820	6
1820	1820	1820	2
1820	1820	1820	2
1820	1820	1820	1
1820	1820	1820	1
1821	1821	1821	222
1821	1821	1821	204
1821	1821	1821	105
1821	1821	1821	59
1821	1821	1821	57
1821	1821	1821	44
1821	1821	1821	29
1821	1821	1821	28
1821	1821	1821	25
1821	1821	1821	14
1821	1821	1821	5
1821	1821	1821	5
1821	1821	1821	3
1821	1821	1821	1
1822	1822	1822	179
1822	1822	1822	171
1822	1822	1822	111
1822	1822	1822	95
1822	1822	1822	34
1822	1822	1822	32
1822	1822	1822	23
1822	1822	1822	21
1822	1822	1822	14
1822	1822	1822	13
1822	1822	1822	6
1822	1822	1822	6
1822	1822	1822	5
1822	1822	1822	4
1822	1822	1822	2
1822	1822	1822	2
1822	1822	1822	1
1822	1822	1822	1
1823	1823	1823	244
1823	1823	1823	73
1823	1823	1823	45
1823	1823	1823	14
1823	1823	1823	7
1823	1823	1823	6
1823	1823	1823	4
1823	1823	1823	3
1823	1823	1823	1
1823	1823	1823	1
1834	1834	1834	436
1834	1834	1834	256
1834	1834	1834	166
1834	1834	1834	121
1834	1834	1834	73
1834	1834	1834	46
1834	1834	1834	41
1834	1834	1834	32
1834	1834	1834	19
1834	1834	1834	15
1834	1834	1834	13
1834	1834	1834	6
1834	1834	1834	3
1834	1834	1834	3
1834	1834	1834	2
1834	1834	1834	1
1835	1835	1835	475
1835	1835	1835	249
1835	1835	1835	110
1835	1835	1835	41
1835	1835	1835	34
1835	1835	1835	21
1835	1835	1835	19
1835	1835	1835	15
1835	1835	1835	14
1835	1835	1835	14
1835	1835	1835	8
1835	1835	1835	5
1835	1835	1835	3
1835	1835	1835	1
1870	1870	1870	62
1870	1870	1870	37
1870	1870	1870	26
1870	1870	1870	5
1870	1870	1870	2
1870	1870	1870	2
1870	1870	1870	2
1870	1870	1870	1
1870	1870	1870	1
1870	1870	1870	1
1877	1877	1877	829
1877	1877	1877	255
1877	1877	1877	236
1877	1877	1877	156
1877	1877	1877	19
1877	1877	1877	13
1877	1877	1877	2
1877	1877	1877	2
1877	1877	1877	1
1877	1877	1877	1
1877	1877	1877	1
1904	1904	1904	171
1904	1904	1904	168
1904	1904	1904	101
1904	1904	1904	67
1904	1904	1904	64
1904	1904	1904	63
1904	1904	1904	61
1904	1904	1904	45
1904	1904	1904	39
1904	1904	1904	38
1904	1904	1904	32
1904	1904	1904	24
1904	1904	1904	22
1904	1904	1904	14
1904	1904	1904	12
1904	1904	1904	10
1904	1904	1904	9
1904	1904	1904	6
1904	1904	1904	6
1904	1904	1904	6
1904	1904	1904	5
1904	1904	1904	4
1904	1904	1904	3
1904	1904	1904	2
1904	1904	1904	2
1904	1904	1904	2
1904	1904	1904	2
1904	1904	1904	1
1904	1904	1904	1
1904	1904	1904	1
1904	1904	1904	1
1904	1904	1904	1
1904	1904	1904	1
1904	1904	1904	1
1944	1944	1944	184
1944	1944	1944	158
1944	1944	1944	26
1944	1944	1944	22
1944	1944	1944	21
1944	1944	1944	18
1944	1944	1944	14
1944	1944	1944	11
1944	1944	1944	9
1944	1944	1944	1
1944	1944	1944	1
1944	1944	1944	1
