# Supplementary material for: A general pattern of the species abundance distribution
Source: PeerJ. 2018 Nov 13;6:e5928. doi: 10.7717/peerj.5928 (PMC6238767; doi:10.7717/peerj.5928)
Supplement: Supplemental Information 3 — A dataset (named “gentry”) used to obtain the frequency of SADs. The detail information can be found in appendixes of Baldridge et al. (2016a) and Baldridge et al. (2016b). [file peerj-06-5928-s003.xlsx]

## Sheet: gentry_obs
Sample ID	Station ID	BioDataTaxonName	Abundance
10	10	10	63
10	10	10	51
10	10	10	23
10	10	10	16
10	10	10	13
10	10	10	10
10	10	10	7
10	10	10	7
10	10	10	5
10	10	10	3
10	10	10	3
10	10	10	3
10	10	10	3
10	10	10	2
10	10	10	2
10	10	10	2
10	10	10	2
10	10	10	2
10	10	10	2
10	10	10	1
10	10	10	1
10	10	10	1
10	10	10	1
10	10	10	1
10	10	10	1
10	10	10	1
100	100	100	41
100	100	100	36
100	100	100	34
100	100	100	25
100	100	100	15
100	100	100	10
100	100	100	9
100	100	100	8
100	100	100	8
100	100	100	7
100	100	100	5
100	100	100	5
100	100	100	5
100	100	100	4
100	100	100	4
100	100	100	4
100	100	100	4
100	100	100	4
100	100	100	4
100	100	100	4
100	100	100	3
100	100	100	3
100	100	100	3
100	100	100	3
100	100	100	3
100	100	100	3
100	100	100	3
100	100	100	3
100	100	100	2
100	100	100	2
100	100	100	2
100	100	100	2
100	100	100	2
100	100	100	2
100	100	100	2
100	100	100	2
100	100	100	2
100	100	100	2
100	100	100	1
100	100	100	1
100	100	100	1
100	100	100	1
100	100	100	1
100	100	100	1
100	100	100	1
100	100	100	1
100	100	100	1
100	100	100	1
100	100	100	1
100	100	100	1
100	100	100	1
100	100	100	1
100	100	100	1
100	100	100	1
100	100	100	1
100	100	100	1
100	100	100	1
100	100	100	1
100	100	100	1
100	100	100	1
100	100	100	1
100	100	100	1
100	100	100	1
100	100	100	1
100	100	100	1
100	100	100	1
100	100	100	1
100	100	100	1
100	100	100	1
100	100	100	1
100	100	100	1
101	101	101	41
101	101	101	26
101	101	101	20
101	101	101	16
101	101	101	14
101	101	101	14
101	101	101	12
101	101	101	10
101	101	101	9
101	101	101	7
101	101	101	7
101	101	101	7
101	101	101	7
101	101	101	6
101	101	101	5
101	101	101	5
101	101	101	5
101	101	101	5
101	101	101	5
101	101	101	4
101	101	101	3
101	101	101	3
101	101	101	3
101	101	101	3
101	101	101	3
101	101	101	2
101	101	101	2
101	101	101	2
101	101	101	2
101	101	101	2
101	101	101	2
101	101	101	2
101	101	101	1
101	101	101	1
101	101	101	1
101	101	101	1
101	101	101	1
101	101	101	1
101	101	101	1
101	101	101	1
101	101	101	1
101	101	101	1
101	101	101	1
102	102	102	142
102	102	102	29
102	102	102	21
102	102	102	15
102	102	102	14
102	102	102	14
102	102	102	13
102	102	102	11
102	102	102	10
102	102	102	8
102	102	102	8
102	102	102	8
102	102	102	8
102	102	102	7
102	102	102	7
102	102	102	6
102	102	102	6
102	102	102	6
102	102	102	6
102	102	102	6
102	102	102	6
102	102	102	5
102	102	102	5
102	102	102	5
102	102	102	5
102	102	102	5
102	102	102	5
102	102	102	4
102	102	102	4
102	102	102	4
102	102	102	3
102	102	102	3
102	102	102	3
102	102	102	3
102	102	102	3
102	102	102	3
102	102	102	3
102	102	102	3
102	102	102	3
102	102	102	3
102	102	102	3
102	102	102	3
102	102	102	3
102	102	102	2
102	102	102	2
102	102	102	2
102	102	102	2
102	102	102	2
102	102	102	2
102	102	102	2
102	102	102	2
102	102	102	2
102	102	102	2
102	102	102	2
102	102	102	2
102	102	102	2
102	102	102	2
102	102	102	2
102	102	102	2
102	102	102	2
102	102	102	2
102	102	102	2
102	102	102	2
102	102	102	2
102	102	102	2
102	102	102	1
102	102	102	1
102	102	102	1
102	102	102	1
102	102	102	1
102	102	102	1
102	102	102	1
102	102	102	1
102	102	102	1
102	102	102	1
102	102	102	1
102	102	102	1
102	102	102	1
102	102	102	1
102	102	102	1
102	102	102	1
102	102	102	1
102	102	102	1
102	102	102	1
102	102	102	1
102	102	102	1
102	102	102	1
102	102	102	1
102	102	102	1
102	102	102	1
102	102	102	1
102	102	102	1
102	102	102	1
102	102	102	1
102	102	102	1
102	102	102	1
102	102	102	1
102	102	102	1
102	102	102	1
102	102	102	1
102	102	102	1
102	102	102	1
102	102	102	1
102	102	102	1
102	102	102	1
102	102	102	1
102	102	102	1
102	102	102	1
102	102	102	1
102	102	102	1
102	102	102	1
102	102	102	1
102	102	102	1
102	102	102	1
102	102	102	1
102	102	102	1
102	102	102	1
102	102	102	1
102	102	102	1
102	102	102	1
102	102	102	1
102	102	102	1
102	102	102	1
103	103	103	32
103	103	103	27
103	103	103	21
103	103	103	18
103	103	103	13
103	103	103	13
103	103	103	9
103	103	103	8
103	103	103	7
103	103	103	6
103	103	103	6
103	103	103	6
103	103	103	5
103	103	103	5
103	103	103	5
103	103	103	5
103	103	103	5
103	103	103	5
103	103	103	5
103	103	103	4
103	103	103	4
103	103	103	4
103	103	103	4
103	103	103	4
103	103	103	4
103	103	103	3
103	103	103	3
103	103	103	3
103	103	103	3
103	103	103	3
103	103	103	3
103	103	103	3
103	103	103	3
103	103	103	2
103	103	103	2
103	103	103	2
103	103	103	2
103	103	103	2
103	103	103	2
103	103	103	1
103	103	103	1
103	103	103	1
103	103	103	1
103	103	103	1
103	103	103	1
103	103	103	1
103	103	103	1
103	103	103	1
103	103	103	1
103	103	103	1
103	103	103	1
103	103	103	1
103	103	103	1
103	103	103	1
103	103	103	1
103	103	103	1
103	103	103	1
103	103	103	1
103	103	103	1
103	103	103	1
103	103	103	1
103	103	103	1
103	103	103	1
103	103	103	1
104	104	104	33
104	104	104	30
104	104	104	28
104	104	104	20
104	104	104	13
104	104	104	11
104	104	104	11
104	104	104	11
104	104	104	9
104	104	104	9
104	104	104	9
104	104	104	8
104	104	104	7
104	104	104	6
104	104	104	6
104	104	104	6
104	104	104	6
104	104	104	6
104	104	104	5
104	104	104	5
104	104	104	5
104	104	104	5
104	104	104	5
104	104	104	4
104	104	104	4
104	104	104	4
104	104	104	4
104	104	104	4
104	104	104	4
104	104	104	3
104	104	104	3
104	104	104	3
104	104	104	3
104	104	104	3
104	104	104	3
104	104	104	3
104	104	104	3
104	104	104	3
104	104	104	2
104	104	104	2
104	104	104	2
104	104	104	2
104	104	104	2
104	104	104	2
104	104	104	2
104	104	104	2
104	104	104	1
104	104	104	1
104	104	104	1
104	104	104	1
104	104	104	1
104	104	104	1
104	104	104	1
104	104	104	1
104	104	104	1
104	104	104	1
104	104	104	1
104	104	104	1
104	104	104	1
104	104	104	1
104	104	104	1
104	104	104	1
104	104	104	1
104	104	104	1
104	104	104	1
104	104	104	1
104	104	104	1
104	104	104	1
104	104	104	1
104	104	104	1
104	104	104	1
104	104	104	1
104	104	104	1
105	105	105	24
105	105	105	19
105	105	105	13
105	105	105	11
105	105	105	11
105	105	105	9
105	105	105	9
105	105	105	9
105	105	105	8
105	105	105	7
105	105	105	6
105	105	105	5
105	105	105	5
105	105	105	5
105	105	105	5
105	105	105	4
105	105	105	4
105	105	105	4
105	105	105	4
105	105	105	4
105	105	105	4
105	105	105	4
105	105	105	4
105	105	105	3
105	105	105	3
105	105	105	3
105	105	105	3
105	105	105	3
105	105	105	3
105	105	105	3
105	105	105	3
105	105	105	3
105	105	105	3
105	105	105	3
105	105	105	3
105	105	105	3
105	105	105	2
105	105	105	2
105	105	105	2
105	105	105	2
105	105	105	2
105	105	105	2
105	105	105	2
105	105	105	2
105	105	105	2
105	105	105	2
105	105	105	2
105	105	105	2
105	105	105	2
105	105	105	2
105	105	105	2
105	105	105	2
105	105	105	2
105	105	105	2
105	105	105	2
105	105	105	2
105	105	105	2
105	105	105	2
105	105	105	1
105	105	105	1
105	105	105	1
105	105	105	1
105	105	105	1
105	105	105	1
105	105	105	1
105	105	105	1
105	105	105	1
105	105	105	1
105	105	105	1
105	105	105	1
105	105	105	1
105	105	105	1
105	105	105	1
105	105	105	1
105	105	105	1
105	105	105	1
105	105	105	1
105	105	105	1
105	105	105	1
105	105	105	1
105	105	105	1
105	105	105	1
105	105	105	1
105	105	105	1
105	105	105	1
105	105	105	1
105	105	105	1
105	105	105	1
105	105	105	1
105	105	105	1
105	105	105	1
105	105	105	1
105	105	105	1
105	105	105	1
105	105	105	1
105	105	105	1
105	105	105	1
105	105	105	1
105	105	105	1
105	105	105	1
105	105	105	1
105	105	105	1
105	105	105	1
105	105	105	1
105	105	105	1
105	105	105	1
105	105	105	1
106	106	106	19
106	106	106	14
106	106	106	12
106	106	106	9
106	106	106	9
106	106	106	9
106	106	106	8
106	106	106	8
106	106	106	7
106	106	106	7
106	106	106	6
106	106	106	6
106	106	106	5
106	106	106	5
106	106	106	4
106	106	106	4
106	106	106	4
106	106	106	4
106	106	106	4
106	106	106	4
106	106	106	4
106	106	106	3
106	106	106	3
106	106	106	3
106	106	106	3
106	106	106	3
106	106	106	3
106	106	106	3
106	106	106	3
106	106	106	3
106	106	106	3
106	106	106	3
106	106	106	3
106	106	106	2
106	106	106	2
106	106	106	2
106	106	106	2
106	106	106	2
106	106	106	2
106	106	106	2
106	106	106	2
106	106	106	2
106	106	106	2
106	106	106	2
106	106	106	2
106	106	106	2
106	106	106	2
106	106	106	2
106	106	106	2
106	106	106	2
106	106	106	2
106	106	106	2
106	106	106	2
106	106	106	2
106	106	106	2
106	106	106	2
106	106	106	2
106	106	106	2
106	106	106	2
106	106	106	1
106	106	106	1
106	106	106	1
106	106	106	1
106	106	106	1
106	106	106	1
106	106	106	1
106	106	106	1
106	106	106	1
106	106	106	1
106	106	106	1
106	106	106	1
106	106	106	1
106	106	106	1
106	106	106	1
106	106	106	1
106	106	106	1
106	106	106	1
106	106	106	1
106	106	106	1
106	106	106	1
106	106	106	1
106	106	106	1
106	106	106	1
106	106	106	1
106	106	106	1
106	106	106	1
106	106	106	1
106	106	106	1
106	106	106	1
106	106	106	1
106	106	106	1
106	106	106	1
106	106	106	1
106	106	106	1
106	106	106	1
106	106	106	1
106	106	106	1
106	106	106	1
106	106	106	1
106	106	106	1
106	106	106	1
106	106	106	1
106	106	106	1
106	106	106	1
106	106	106	1
106	106	106	1
106	106	106	1
106	106	106	1
106	106	106	1
106	106	106	1
106	106	106	1
106	106	106	1
106	106	106	1
106	106	106	1
106	106	106	1
106	106	106	1
106	106	106	1
106	106	106	1
106	106	106	1
106	106	106	1
106	106	106	1
106	106	106	1
107	107	107	48
107	107	107	15
107	107	107	14
107	107	107	11
107	107	107	11
107	107	107	11
107	107	107	9
107	107	107	8
107	107	107	8
107	107	107	7
107	107	107	7
107	107	107	6
107	107	107	6
107	107	107	6
107	107	107	5
107	107	107	5
107	107	107	5
107	107	107	4
107	107	107	4
107	107	107	4
107	107	107	3
107	107	107	3
107	107	107	3
107	107	107	3
107	107	107	3
107	107	107	3
107	107	107	3
107	107	107	3
107	107	107	3
107	107	107	3
107	107	107	3
107	107	107	3
107	107	107	3
107	107	107	3
107	107	107	2
107	107	107	2
107	107	107	2
107	107	107	2
107	107	107	2
107	107	107	2
107	107	107	2
107	107	107	2
107	107	107	2
107	107	107	2
107	107	107	2
107	107	107	2
107	107	107	2
107	107	107	2
107	107	107	2
107	107	107	2
107	107	107	2
107	107	107	2
107	107	107	2
107	107	107	2
107	107	107	2
107	107	107	2
107	107	107	2
107	107	107	2
107	107	107	1
107	107	107	1
107	107	107	1
107	107	107	1
107	107	107	1
107	107	107	1
107	107	107	1
107	107	107	1
107	107	107	1
107	107	107	1
107	107	107	1
107	107	107	1
107	107	107	1
107	107	107	1
107	107	107	1
107	107	107	1
107	107	107	1
107	107	107	1
107	107	107	1
107	107	107	1
107	107	107	1
107	107	107	1
107	107	107	1
107	107	107	1
107	107	107	1
107	107	107	1
107	107	107	1
107	107	107	1
107	107	107	1
107	107	107	1
107	107	107	1
107	107	107	1
107	107	107	1
107	107	107	1
107	107	107	1
107	107	107	1
107	107	107	1
107	107	107	1
108	108	108	28
108	108	108	16
108	108	108	14
108	108	108	11
108	108	108	8
108	108	108	8
108	108	108	7
108	108	108	6
108	108	108	6
108	108	108	5
108	108	108	5
108	108	108	5
108	108	108	5
108	108	108	4
108	108	108	4
108	108	108	4
108	108	108	4
108	108	108	4
108	108	108	4
108	108	108	4
108	108	108	3
108	108	108	3
108	108	108	3
108	108	108	3
108	108	108	3
108	108	108	3
108	108	108	3
108	108	108	3
108	108	108	3
108	108	108	3
108	108	108	3
108	108	108	2
108	108	108	2
108	108	108	2
108	108	108	2
108	108	108	2
108	108	108	2
108	108	108	2
108	108	108	2
108	108	108	2
108	108	108	2
108	108	108	2
108	108	108	2
108	108	108	2
108	108	108	2
108	108	108	2
108	108	108	2
108	108	108	2
108	108	108	1
108	108	108	1
108	108	108	1
108	108	108	1
108	108	108	1
108	108	108	1
108	108	108	1
108	108	108	1
108	108	108	1
108	108	108	1
108	108	108	1
108	108	108	1
108	108	108	1
108	108	108	1
108	108	108	1
108	108	108	1
108	108	108	1
108	108	108	1
108	108	108	1
108	108	108	1
108	108	108	1
108	108	108	1
108	108	108	1
108	108	108	1
108	108	108	1
108	108	108	1
108	108	108	1
108	108	108	1
108	108	108	1
108	108	108	1
108	108	108	1
108	108	108	1
108	108	108	1
108	108	108	1
108	108	108	1
108	108	108	1
108	108	108	1
108	108	108	1
108	108	108	1
108	108	108	1
108	108	108	1
108	108	108	1
108	108	108	1
108	108	108	1
108	108	108	1
108	108	108	1
108	108	108	1
108	108	108	1
109	109	109	36
109	109	109	27
109	109	109	17
109	109	109	10
109	109	109	7
109	109	109	7
109	109	109	7
109	109	109	6
109	109	109	6
109	109	109	5
109	109	109	5
109	109	109	4
109	109	109	4
109	109	109	4
109	109	109	4
109	109	109	4
109	109	109	3
109	109	109	3
109	109	109	3
109	109	109	3
109	109	109	3
109	109	109	3
109	109	109	3
109	109	109	2
109	109	109	2
109	109	109	2
109	109	109	2
109	109	109	2
109	109	109	2
109	109	109	2
109	109	109	2
109	109	109	2
109	109	109	2
109	109	109	1
109	109	109	1
109	109	109	1
109	109	109	1
109	109	109	1
109	109	109	1
109	109	109	1
109	109	109	1
109	109	109	1
109	109	109	1
109	109	109	1
109	109	109	1
109	109	109	1
109	109	109	1
11	11	11	16
11	11	11	13
11	11	11	12
11	11	11	10
11	11	11	10
11	11	11	8
11	11	11	7
11	11	11	5
11	11	11	3
11	11	11	2
11	11	11	2
11	11	11	2
11	11	11	1
11	11	11	1
11	11	11	1
11	11	11	1
11	11	11	1
110	110	110	31
110	110	110	17
110	110	110	17
110	110	110	9
110	110	110	6
110	110	110	6
110	110	110	5
110	110	110	4
110	110	110	4
110	110	110	4
110	110	110	4
110	110	110	3
110	110	110	3
110	110	110	3
110	110	110	3
110	110	110	3
110	110	110	3
110	110	110	3
110	110	110	3
110	110	110	2
110	110	110	2
110	110	110	2
110	110	110	2
110	110	110	2
110	110	110	2
110	110	110	2
110	110	110	2
110	110	110	2
110	110	110	2
110	110	110	2
110	110	110	2
110	110	110	2
110	110	110	2
110	110	110	2
110	110	110	1
110	110	110	1
110	110	110	1
110	110	110	1
110	110	110	1
110	110	110	1
110	110	110	1
110	110	110	1
110	110	110	1
110	110	110	1
110	110	110	1
110	110	110	1
110	110	110	1
110	110	110	1
110	110	110	1
110	110	110	1
110	110	110	1
110	110	110	1
110	110	110	1
110	110	110	1
110	110	110	1
110	110	110	1
110	110	110	1
110	110	110	1
110	110	110	1
110	110	110	1
110	110	110	1
110	110	110	1
110	110	110	1
110	110	110	1
110	110	110	1
110	110	110	1
110	110	110	1
110	110	110	1
110	110	110	1
110	110	110	1
110	110	110	1
110	110	110	1
110	110	110	1
110	110	110	1
110	110	110	1
110	110	110	1
110	110	110	1
110	110	110	1
111	111	111	50
111	111	111	14
111	111	111	12
111	111	111	12
111	111	111	11
111	111	111	11
111	111	111	10
111	111	111	9
111	111	111	8
111	111	111	8
111	111	111	7
111	111	111	7
111	111	111	7
111	111	111	6
111	111	111	6
111	111	111	6
111	111	111	6
111	111	111	6
111	111	111	5
111	111	111	5
111	111	111	5
111	111	111	4
111	111	111	4
111	111	111	4
111	111	111	4
111	111	111	4
111	111	111	4
111	111	111	4
111	111	111	4
111	111	111	3
111	111	111	3
111	111	111	3
111	111	111	3
111	111	111	3
111	111	111	3
111	111	111	3
111	111	111	3
111	111	111	3
111	111	111	3
111	111	111	3
111	111	111	3
111	111	111	3
111	111	111	3
111	111	111	3
111	111	111	3
111	111	111	2
111	111	111	2
111	111	111	2
111	111	111	2
111	111	111	2
111	111	111	2
111	111	111	2
111	111	111	2
111	111	111	2
111	111	111	2
111	111	111	2
111	111	111	2
111	111	111	2
111	111	111	2
111	111	111	2
111	111	111	2
111	111	111	2
111	111	111	2
111	111	111	2
111	111	111	2
111	111	111	2
111	111	111	1
111	111	111	1
111	111	111	1
111	111	111	1
111	111	111	1
111	111	111	1
111	111	111	1
111	111	111	1
111	111	111	1
111	111	111	1
111	111	111	1
111	111	111	1
111	111	111	1
111	111	111	1
111	111	111	1
111	111	111	1
111	111	111	1
111	111	111	1
111	111	111	1
111	111	111	1
111	111	111	1
111	111	111	1
111	111	111	1
111	111	111	1
111	111	111	1
111	111	111	1
111	111	111	1
111	111	111	1
111	111	111	1
111	111	111	1
111	111	111	1
111	111	111	1
111	111	111	1
111	111	111	1
111	111	111	1
111	111	111	1
111	111	111	1
111	111	111	1
111	111	111	1
111	111	111	1
111	111	111	1
111	111	111	1
111	111	111	1
111	111	111	1
111	111	111	1
111	111	111	1
111	111	111	1
111	111	111	1
111	111	111	1
111	111	111	1
111	111	111	1
111	111	111	1
112	112	112	21
112	112	112	11
112	112	112	11
112	112	112	9
112	112	112	9
112	112	112	9
112	112	112	9
112	112	112	8
112	112	112	7
112	112	112	7
112	112	112	7
112	112	112	7
112	112	112	6
112	112	112	6
112	112	112	6
112	112	112	5
112	112	112	5
112	112	112	4
112	112	112	4
112	112	112	4
112	112	112	4
112	112	112	4
112	112	112	3
112	112	112	3
112	112	112	3
112	112	112	3
112	112	112	3
112	112	112	3
112	112	112	3
112	112	112	3
112	112	112	3
112	112	112	3
112	112	112	3
112	112	112	3
112	112	112	3
112	112	112	3
112	112	112	3
112	112	112	3
112	112	112	3
112	112	112	3
112	112	112	2
112	112	112	2
112	112	112	2
112	112	112	2
112	112	112	2
112	112	112	2
112	112	112	2
112	112	112	2
112	112	112	2
112	112	112	2
112	112	112	2
112	112	112	2
112	112	112	2
112	112	112	2
112	112	112	2
112	112	112	2
112	112	112	2
112	112	112	2
112	112	112	2
112	112	112	2
112	112	112	2
112	112	112	2
112	112	112	2
112	112	112	2
112	112	112	2
112	112	112	2
112	112	112	2
112	112	112	2
112	112	112	2
112	112	112	2
112	112	112	2
112	112	112	2
112	112	112	2
112	112	112	2
112	112	112	2
112	112	112	2
112	112	112	2
112	112	112	2
112	112	112	2
112	112	112	1
112	112	112	1
112	112	112	1
112	112	112	1
112	112	112	1
112	112	112	1
112	112	112	1
112	112	112	1
112	112	112	1
112	112	112	1
112	112	112	1
112	112	112	1
112	112	112	1
112	112	112	1
112	112	112	1
112	112	112	1
112	112	112	1
112	112	112	1
112	112	112	1
112	112	112	1
112	112	112	1
112	112	112	1
112	112	112	1
112	112	112	1
112	112	112	1
112	112	112	1
112	112	112	1
112	112	112	1
112	112	112	1
112	112	112	1
112	112	112	1
112	112	112	1
112	112	112	1
112	112	112	1
112	112	112	1
112	112	112	1
112	112	112	1
112	112	112	1
112	112	112	1
112	112	112	1
112	112	112	1
112	112	112	1
112	112	112	1
112	112	112	1
112	112	112	1
112	112	112	1
112	112	112	1
112	112	112	1
112	112	112	1
112	112	112	1
112	112	112	1
112	112	112	1
112	112	112	1
112	112	112	1
112	112	112	1
112	112	112	1
112	112	112	1
112	112	112	1
112	112	112	1
112	112	112	1
112	112	112	1
112	112	112	1
112	112	112	1
112	112	112	1
112	112	112	1
112	112	112	1
113	113	113	29
113	113	113	27
113	113	113	19
113	113	113	19
113	113	113	18
113	113	113	17
113	113	113	16
113	113	113	13
113	113	113	13
113	113	113	12
113	113	113	12
113	113	113	11
113	113	113	10
113	113	113	10
113	113	113	9
113	113	113	8
113	113	113	8
113	113	113	8
113	113	113	7
113	113	113	7
113	113	113	6
113	113	113	6
113	113	113	5
113	113	113	5
113	113	113	5
113	113	113	4
113	113	113	4
113	113	113	4
113	113	113	4
113	113	113	4
113	113	113	4
113	113	113	4
113	113	113	4
113	113	113	3
113	113	113	3
113	113	113	3
113	113	113	3
113	113	113	3
113	113	113	3
113	113	113	3
113	113	113	3
113	113	113	3
113	113	113	3
113	113	113	3
113	113	113	2
113	113	113	2
113	113	113	2
113	113	113	2
113	113	113	2
113	113	113	2
113	113	113	2
113	113	113	2
113	113	113	2
113	113	113	2
113	113	113	2
113	113	113	2
113	113	113	2
113	113	113	2
113	113	113	2
113	113	113	2
113	113	113	1
113	113	113	1
113	113	113	1
113	113	113	1
113	113	113	1
113	113	113	1
113	113	113	1
113	113	113	1
113	113	113	1
113	113	113	1
113	113	113	1
113	113	113	1
113	113	113	1
113	113	113	1
113	113	113	1
113	113	113	1
113	113	113	1
113	113	113	1
113	113	113	1
113	113	113	1
113	113	113	1
113	113	113	1
113	113	113	1
113	113	113	1
113	113	113	1
113	113	113	1
113	113	113	1
113	113	113	1
113	113	113	1
113	113	113	1
113	113	113	1
113	113	113	1
113	113	113	1
113	113	113	1
113	113	113	1
113	113	113	1
113	113	113	1
113	113	113	1
113	113	113	1
113	113	113	1
113	113	113	1
113	113	113	1
113	113	113	1
114	114	114	30
114	114	114	10
114	114	114	9
114	114	114	9
114	114	114	9
114	114	114	7
114	114	114	6
114	114	114	6
114	114	114	6
114	114	114	4
114	114	114	4
114	114	114	4
114	114	114	4
114	114	114	4
114	114	114	4
114	114	114	3
114	114	114	3
114	114	114	3
114	114	114	3
114	114	114	3
114	114	114	3
114	114	114	3
114	114	114	3
114	114	114	3
114	114	114	3
114	114	114	2
114	114	114	2
114	114	114	2
114	114	114	2
114	114	114	2
114	114	114	2
114	114	114	2
114	114	114	2
114	114	114	2
114	114	114	2
114	114	114	2
114	114	114	2
114	114	114	2
114	114	114	2
114	114	114	1
114	114	114	1
114	114	114	1
114	114	114	1
114	114	114	1
114	114	114	1
114	114	114	1
114	114	114	1
114	114	114	1
114	114	114	1
114	114	114	1
114	114	114	1
114	114	114	1
114	114	114	1
114	114	114	1
114	114	114	1
114	114	114	1
114	114	114	1
114	114	114	1
114	114	114	1
114	114	114	1
114	114	114	1
114	114	114	1
114	114	114	1
114	114	114	1
114	114	114	1
114	114	114	1
114	114	114	1
114	114	114	1
114	114	114	1
114	114	114	1
114	114	114	1
115	115	115	38
115	115	115	36
115	115	115	35
115	115	115	28
115	115	115	17
115	115	115	14
115	115	115	10
115	115	115	9
115	115	115	8
115	115	115	8
115	115	115	6
115	115	115	4
115	115	115	4
115	115	115	4
115	115	115	4
115	115	115	4
115	115	115	3
115	115	115	3
115	115	115	3
115	115	115	3
115	115	115	3
115	115	115	3
115	115	115	3
115	115	115	3
115	115	115	3
115	115	115	2
115	115	115	2
115	115	115	2
115	115	115	2
115	115	115	2
115	115	115	2
115	115	115	2
115	115	115	2
115	115	115	2
115	115	115	1
115	115	115	1
115	115	115	1
115	115	115	1
115	115	115	1
115	115	115	1
115	115	115	1
115	115	115	1
115	115	115	1
115	115	115	1
115	115	115	1
115	115	115	1
115	115	115	1
115	115	115	1
115	115	115	1
115	115	115	1
115	115	115	1
115	115	115	1
115	115	115	1
115	115	115	1
115	115	115	1
115	115	115	1
115	115	115	1
115	115	115	1
115	115	115	1
115	115	115	1
115	115	115	1
115	115	115	1
115	115	115	1
115	115	115	1
115	115	115	1
115	115	115	1
115	115	115	1
115	115	115	1
115	115	115	1
115	115	115	1
115	115	115	1
115	115	115	1
115	115	115	1
115	115	115	1
115	115	115	1
115	115	115	1
115	115	115	1
115	115	115	1
115	115	115	1
115	115	115	1
115	115	115	1
115	115	115	1
115	115	115	1
115	115	115	1
115	115	115	1
115	115	115	1
115	115	115	1
115	115	115	1
115	115	115	1
115	115	115	1
115	115	115	1
116	116	116	11
116	116	116	9
116	116	116	7
116	116	116	6
116	116	116	6
116	116	116	5
116	116	116	5
116	116	116	5
116	116	116	4
116	116	116	4
116	116	116	4
116	116	116	4
116	116	116	4
116	116	116	4
116	116	116	4
116	116	116	4
116	116	116	4
116	116	116	3
116	116	116	3
116	116	116	3
116	116	116	3
116	116	116	3
116	116	116	3
116	116	116	3
116	116	116	3
116	116	116	3
116	116	116	3
116	116	116	3
116	116	116	3
116	116	116	3
116	116	116	3
116	116	116	3
116	116	116	3
116	116	116	3
116	116	116	2
116	116	116	2
116	116	116	2
116	116	116	2
116	116	116	2
116	116	116	2
116	116	116	2
116	116	116	2
116	116	116	2
116	116	116	2
116	116	116	2
116	116	116	2
116	116	116	2
116	116	116	2
116	116	116	2
116	116	116	2
116	116	116	2
116	116	116	2
116	116	116	2
116	116	116	2
116	116	116	2
116	116	116	2
116	116	116	2
116	116	116	2
116	116	116	2
116	116	116	2
116	116	116	2
116	116	116	2
116	116	116	2
116	116	116	2
116	116	116	2
116	116	116	2
116	116	116	2
116	116	116	2
116	116	116	2
116	116	116	2
116	116	116	2
116	116	116	2
116	116	116	2
116	116	116	2
116	116	116	1
116	116	116	1
116	116	116	1
116	116	116	1
116	116	116	1
116	116	116	1
116	116	116	1
116	116	116	1
116	116	116	1
116	116	116	1
116	116	116	1
116	116	116	1
116	116	116	1
116	116	116	1
116	116	116	1
116	116	116	1
116	116	116	1
116	116	116	1
116	116	116	1
116	116	116	1
116	116	116	1
116	116	116	1
116	116	116	1
116	116	116	1
116	116	116	1
116	116	116	1
116	116	116	1
116	116	116	1
116	116	116	1
116	116	116	1
116	116	116	1
116	116	116	1
116	116	116	1
116	116	116	1
116	116	116	1
116	116	116	1
116	116	116	1
116	116	116	1
116	116	116	1
116	116	116	1
116	116	116	1
116	116	116	1
116	116	116	1
116	116	116	1
116	116	116	1
116	116	116	1
116	116	116	1
116	116	116	1
116	116	116	1
116	116	116	1
116	116	116	1
116	116	116	1
116	116	116	1
116	116	116	1
116	116	116	1
116	116	116	1
116	116	116	1
116	116	116	1
116	116	116	1
116	116	116	1
116	116	116	1
116	116	116	1
116	116	116	1
116	116	116	1
116	116	116	1
116	116	116	1
116	116	116	1
116	116	116	1
116	116	116	1
116	116	116	1
116	116	116	1
116	116	116	1
116	116	116	1
116	116	116	1
116	116	116	1
116	116	116	1
116	116	116	1
116	116	116	1
116	116	116	1
116	116	116	1
116	116	116	1
116	116	116	1
116	116	116	1
116	116	116	1
116	116	116	1
116	116	116	1
116	116	116	1
116	116	116	1
116	116	116	1
116	116	116	1
116	116	116	1
116	116	116	1
116	116	116	1
116	116	116	1
116	116	116	1
116	116	116	1
116	116	116	1
116	116	116	1
116	116	116	1
117	117	117	102
117	117	117	26
117	117	117	26
117	117	117	14
117	117	117	8
117	117	117	7
117	117	117	6
117	117	117	5
117	117	117	5
117	117	117	5
117	117	117	5
117	117	117	4
117	117	117	4
117	117	117	4
117	117	117	3
117	117	117	3
117	117	117	3
117	117	117	3
117	117	117	3
117	117	117	2
117	117	117	2
117	117	117	2
117	117	117	2
117	117	117	2
117	117	117	2
117	117	117	1
117	117	117	1
117	117	117	1
117	117	117	1
117	117	117	1
117	117	117	1
117	117	117	1
117	117	117	1
117	117	117	1
118	118	118	31
118	118	118	16
118	118	118	7
118	118	118	7
118	118	118	7
118	118	118	6
118	118	118	6
118	118	118	6
118	118	118	5
118	118	118	5
118	118	118	5
118	118	118	5
118	118	118	5
118	118	118	5
118	118	118	4
118	118	118	4
118	118	118	4
118	118	118	4
118	118	118	4
118	118	118	4
118	118	118	4
118	118	118	3
118	118	118	3
118	118	118	3
118	118	118	3
118	118	118	3
118	118	118	3
118	118	118	3
118	118	118	3
118	118	118	3
118	118	118	3
118	118	118	3
118	118	118	3
118	118	118	3
118	118	118	3
118	118	118	3
118	118	118	3
118	118	118	2
118	118	118	2
118	118	118	2
118	118	118	2
118	118	118	2
118	118	118	2
118	118	118	2
118	118	118	2
118	118	118	2
118	118	118	2
118	118	118	2
118	118	118	2
118	118	118	2
118	118	118	2
118	118	118	2
118	118	118	2
118	118	118	2
118	118	118	2
118	118	118	2
118	118	118	2
118	118	118	2
118	118	118	2
118	118	118	2
118	118	118	2
118	118	118	2
118	118	118	2
118	118	118	2
118	118	118	2
118	118	118	2
118	118	118	2
118	118	118	2
118	118	118	2
118	118	118	2
118	118	118	2
118	118	118	2
118	118	118	2
118	118	118	1
118	118	118	1
118	118	118	1
118	118	118	1
118	118	118	1
118	118	118	1
118	118	118	1
118	118	118	1
118	118	118	1
118	118	118	1
118	118	118	1
118	118	118	1
118	118	118	1
118	118	118	1
118	118	118	1
118	118	118	1
118	118	118	1
118	118	118	1
118	118	118	1
118	118	118	1
118	118	118	1
118	118	118	1
118	118	118	1
118	118	118	1
118	118	118	1
118	118	118	1
118	118	118	1
118	118	118	1
118	118	118	1
118	118	118	1
118	118	118	1
118	118	118	1
118	118	118	1
118	118	118	1
118	118	118	1
118	118	118	1
118	118	118	1
118	118	118	1
118	118	118	1
118	118	118	1
118	118	118	1
118	118	118	1
118	118	118	1
118	118	118	1
118	118	118	1
118	118	118	1
118	118	118	1
118	118	118	1
118	118	118	1
118	118	118	1
118	118	118	1
118	118	118	1
118	118	118	1
118	118	118	1
118	118	118	1
118	118	118	1
118	118	118	1
118	118	118	1
118	118	118	1
118	118	118	1
118	118	118	1
118	118	118	1
118	118	118	1
118	118	118	1
118	118	118	1
118	118	118	1
118	118	118	1
118	118	118	1
118	118	118	1
118	118	118	1
118	118	118	1
118	118	118	1
118	118	118	1
118	118	118	1
118	118	118	1
118	118	118	1
118	118	118	1
118	118	118	1
118	118	118	1
118	118	118	1
118	118	118	1
118	118	118	1
118	118	118	1
118	118	118	1
118	118	118	1
118	118	118	1
118	118	118	1
118	118	118	1
118	118	118	1
118	118	118	1
118	118	118	1
118	118	118	1
118	118	118	1
118	118	118	1
118	118	118	1
118	118	118	1
118	118	118	1
118	118	118	1
118	118	118	1
118	118	118	1
118	118	118	1
118	118	118	1
118	118	118	1
118	118	118	1
118	118	118	1
118	118	118	1
118	118	118	1
118	118	118	1
118	118	118	1
118	118	118	1
118	118	118	1
118	118	118	1
118	118	118	1
118	118	118	1
118	118	118	1
118	118	118	1
118	118	118	1
118	118	118	1
118	118	118	1
118	118	118	1
118	118	118	1
118	118	118	1
118	118	118	1
118	118	118	1
118	118	118	1
118	118	118	1
118	118	118	1
118	118	118	1
118	118	118	1
118	118	118	1
118	118	118	1
118	118	118	1
118	118	118	1
118	118	118	1
118	118	118	1
118	118	118	1
118	118	118	1
118	118	118	1
119	119	119	69
119	119	119	66
119	119	119	16
119	119	119	16
119	119	119	15
119	119	119	12
119	119	119	10
119	119	119	9
119	119	119	9
119	119	119	8
119	119	119	8
119	119	119	8
119	119	119	7
119	119	119	6
119	119	119	6
119	119	119	6
119	119	119	6
119	119	119	5
119	119	119	4
119	119	119	4
119	119	119	4
119	119	119	3
119	119	119	3
119	119	119	3
119	119	119	3
119	119	119	2
119	119	119	2
119	119	119	2
119	119	119	2
119	119	119	2
119	119	119	1
119	119	119	1
119	119	119	1
119	119	119	1
119	119	119	1
119	119	119	1
119	119	119	1
119	119	119	1
119	119	119	1
119	119	119	1
119	119	119	1
119	119	119	1
119	119	119	1
119	119	119	1
119	119	119	1
119	119	119	1
119	119	119	1
119	119	119	1
119	119	119	1
119	119	119	1
119	119	119	1
12	12	12	28
12	12	12	27
12	12	12	24
12	12	12	16
12	12	12	14
12	12	12	9
12	12	12	8
12	12	12	7
12	12	12	4
12	12	12	4
12	12	12	3
12	12	12	3
12	12	12	2
12	12	12	2
12	12	12	2
12	12	12	1
12	12	12	1
12	12	12	1
12	12	12	1
12	12	12	1
12	12	12	1
12	12	12	1
12	12	12	1
12	12	12	1
120	120	120	39
120	120	120	32
120	120	120	23
120	120	120	18
120	120	120	18
120	120	120	16
120	120	120	16
120	120	120	13
120	120	120	12
120	120	120	12
120	120	120	10
120	120	120	9
120	120	120	9
120	120	120	8
120	120	120	7
[truncated: 18,289 more rows]
