# Supplementary material for: A general pattern of the species abundance distribution
Source: PeerJ. 2018 Nov 13;6:e5928. doi: 10.7717/peerj.5928 (PMC6238767; doi:10.7717/peerj.5928)
Supplement: Supplemental Information 5 — A dataset (named “fia”) used to obtain the frequency of SADs. The detail information can be found in appendixes of Baldridge et al. (2016a) and Baldridge et al. (2016b). [file peerj-06-5928-s005.xlsx]

## Sheet: fia_obs
Sample ID	Station ID	BioDataTaxonName	Abundance
101001000202	101001000202	101001000202	21
101001000202	101001000202	101001000202	7
101001000202	101001000202	101001000202	6
101001000202	101001000202	101001000202	4
101001000202	101001000202	101001000202	2
101001000202	101001000202	101001000202	2
101001000202	101001000202	101001000202	1
101001000202	101001000202	101001000202	1
101001000202	101001000202	101001000202	1
101001000202	101001000202	101001000202	1
101001000381	101001000381	101001000381	12
101001000381	101001000381	101001000381	6
101001000381	101001000381	101001000381	4
101001000381	101001000381	101001000381	3
101001000381	101001000381	101001000381	2
101001000381	101001000381	101001000381	2
101001000381	101001000381	101001000381	1
101001000381	101001000381	101001000381	1
101001000381	101001000381	101001000381	1
101001000381	101001000381	101001000381	1
101001000381	101001000381	101001000381	1
101001000385	101001000385	101001000385	20
101001000385	101001000385	101001000385	7
101001000385	101001000385	101001000385	5
101001000385	101001000385	101001000385	5
101001000385	101001000385	101001000385	3
101001000385	101001000385	101001000385	3
101001000385	101001000385	101001000385	2
101001000385	101001000385	101001000385	1
101001000385	101001000385	101001000385	1
101001000385	101001000385	101001000385	1
101001000450	101001000450	101001000450	16
101001000450	101001000450	101001000450	5
101001000450	101001000450	101001000450	4
101001000450	101001000450	101001000450	2
101001000450	101001000450	101001000450	2
101001000450	101001000450	101001000450	2
101001000450	101001000450	101001000450	1
101001000450	101001000450	101001000450	1
101001000450	101001000450	101001000450	1
101001000450	101001000450	101001000450	1
101005000025	101005000025	101005000025	32
101005000025	101005000025	101005000025	15
101005000025	101005000025	101005000025	10
101005000025	101005000025	101005000025	4
101005000025	101005000025	101005000025	3
101005000025	101005000025	101005000025	2
101005000025	101005000025	101005000025	2
101005000025	101005000025	101005000025	1
101005000025	101005000025	101005000025	1
101005000025	101005000025	101005000025	1
101005000025	101005000025	101005000025	1
101005000083	101005000083	101005000083	15
101005000083	101005000083	101005000083	4
101005000083	101005000083	101005000083	4
101005000083	101005000083	101005000083	3
101005000083	101005000083	101005000083	3
101005000083	101005000083	101005000083	2
101005000083	101005000083	101005000083	2
101005000083	101005000083	101005000083	1
101005000083	101005000083	101005000083	1
101005000083	101005000083	101005000083	1
101005000083	101005000083	101005000083	1
101005000269	101005000269	101005000269	9
101005000269	101005000269	101005000269	8
101005000269	101005000269	101005000269	6
101005000269	101005000269	101005000269	6
101005000269	101005000269	101005000269	5
101005000269	101005000269	101005000269	5
101005000269	101005000269	101005000269	4
101005000269	101005000269	101005000269	3
101005000269	101005000269	101005000269	2
101005000269	101005000269	101005000269	2
101005000269	101005000269	101005000269	1
101005000269	101005000269	101005000269	1
101005000269	101005000269	101005000269	1
101005000269	101005000269	101005000269	1
101005000299	101005000299	101005000299	12
101005000299	101005000299	101005000299	8
101005000299	101005000299	101005000299	5
101005000299	101005000299	101005000299	4
101005000299	101005000299	101005000299	4
101005000299	101005000299	101005000299	4
101005000299	101005000299	101005000299	3
101005000299	101005000299	101005000299	2
101005000299	101005000299	101005000299	1
101005000299	101005000299	101005000299	1
101005000325	101005000325	101005000325	12
101005000325	101005000325	101005000325	5
101005000325	101005000325	101005000325	4
101005000325	101005000325	101005000325	2
101005000325	101005000325	101005000325	2
101005000325	101005000325	101005000325	1
101005000325	101005000325	101005000325	1
101005000325	101005000325	101005000325	1
101005000325	101005000325	101005000325	1
101005000325	101005000325	101005000325	1
101005000325	101005000325	101005000325	1
101005000366	101005000366	101005000366	17
101005000366	101005000366	101005000366	9
101005000366	101005000366	101005000366	5
101005000366	101005000366	101005000366	5
101005000366	101005000366	101005000366	5
101005000366	101005000366	101005000366	3
101005000366	101005000366	101005000366	2
101005000366	101005000366	101005000366	2
101005000366	101005000366	101005000366	1
101005000366	101005000366	101005000366	1
101005000366	101005000366	101005000366	1
101005000389	101005000389	101005000389	9
101005000389	101005000389	101005000389	8
101005000389	101005000389	101005000389	8
101005000389	101005000389	101005000389	6
101005000389	101005000389	101005000389	4
101005000389	101005000389	101005000389	3
101005000389	101005000389	101005000389	3
101005000389	101005000389	101005000389	2
101005000389	101005000389	101005000389	1
101005000389	101005000389	101005000389	1
11003000020	11003000020	11003000020	12
11003000020	11003000020	11003000020	12
11003000020	11003000020	11003000020	8
11003000020	11003000020	11003000020	5
11003000020	11003000020	11003000020	4
11003000020	11003000020	11003000020	3
11003000020	11003000020	11003000020	2
11003000020	11003000020	11003000020	1
11003000020	11003000020	11003000020	1
11003000020	11003000020	11003000020	1
11003000037	11003000037	11003000037	7
11003000037	11003000037	11003000037	6
11003000037	11003000037	11003000037	5
11003000037	11003000037	11003000037	5
11003000037	11003000037	11003000037	3
11003000037	11003000037	11003000037	2
11003000037	11003000037	11003000037	1
11003000037	11003000037	11003000037	1
11003000037	11003000037	11003000037	1
11003000037	11003000037	11003000037	1
11003000088	11003000088	11003000088	8
11003000088	11003000088	11003000088	7
11003000088	11003000088	11003000088	4
11003000088	11003000088	11003000088	3
11003000088	11003000088	11003000088	2
11003000088	11003000088	11003000088	2
11003000088	11003000088	11003000088	2
11003000088	11003000088	11003000088	2
11003000088	11003000088	11003000088	1
11003000088	11003000088	11003000088	1
11003000100	11003000100	11003000100	3
11003000100	11003000100	11003000100	2
11003000100	11003000100	11003000100	2
11003000100	11003000100	11003000100	2
11003000100	11003000100	11003000100	2
11003000100	11003000100	11003000100	1
11003000100	11003000100	11003000100	1
11003000100	11003000100	11003000100	1
11003000100	11003000100	11003000100	1
11003000100	11003000100	11003000100	1
11003000100	11003000100	11003000100	1
11003000188	11003000188	11003000188	17
11003000188	11003000188	11003000188	5
11003000188	11003000188	11003000188	5
11003000188	11003000188	11003000188	5
11003000188	11003000188	11003000188	3
11003000188	11003000188	11003000188	2
11003000188	11003000188	11003000188	2
11003000188	11003000188	11003000188	1
11003000188	11003000188	11003000188	1
11003000188	11003000188	11003000188	1
11003000253	11003000253	11003000253	26
11003000253	11003000253	11003000253	5
11003000253	11003000253	11003000253	4
11003000253	11003000253	11003000253	4
11003000253	11003000253	11003000253	4
11003000253	11003000253	11003000253	3
11003000253	11003000253	11003000253	3
11003000253	11003000253	11003000253	1
11003000253	11003000253	11003000253	1
11003000253	11003000253	11003000253	1
11003000253	11003000253	11003000253	1
11003000255	11003000255	11003000255	13
11003000255	11003000255	11003000255	7
11003000255	11003000255	11003000255	6
11003000255	11003000255	11003000255	5
11003000255	11003000255	11003000255	5
11003000255	11003000255	11003000255	3
11003000255	11003000255	11003000255	2
11003000255	11003000255	11003000255	2
11003000255	11003000255	11003000255	2
11003000255	11003000255	11003000255	1
11003000255	11003000255	11003000255	1
11003000255	11003000255	11003000255	1
11003000255	11003000255	11003000255	1
11003000258	11003000258	11003000258	9
11003000258	11003000258	11003000258	5
11003000258	11003000258	11003000258	4
11003000258	11003000258	11003000258	3
11003000258	11003000258	11003000258	2
11003000258	11003000258	11003000258	2
11003000258	11003000258	11003000258	2
11003000258	11003000258	11003000258	2
11003000258	11003000258	11003000258	1
11003000258	11003000258	11003000258	1
11003000263	11003000263	11003000263	22
11003000263	11003000263	11003000263	10
11003000263	11003000263	11003000263	8
11003000263	11003000263	11003000263	5
11003000263	11003000263	11003000263	5
11003000263	11003000263	11003000263	2
11003000263	11003000263	11003000263	2
11003000263	11003000263	11003000263	2
11003000263	11003000263	11003000263	1
11003000263	11003000263	11003000263	1
11003000263	11003000263	11003000263	1
11003000263	11003000263	11003000263	1
11039000021	11039000021	11039000021	11
11039000021	11039000021	11039000021	6
11039000021	11039000021	11039000021	6
11039000021	11039000021	11039000021	6
11039000021	11039000021	11039000021	4
11039000021	11039000021	11039000021	3
11039000021	11039000021	11039000021	2
11039000021	11039000021	11039000021	2
11039000021	11039000021	11039000021	2
11039000021	11039000021	11039000021	1
11039000021	11039000021	11039000021	1
11039000021	11039000021	11039000021	1
11039000027	11039000027	11039000027	5
11039000027	11039000027	11039000027	3
11039000027	11039000027	11039000027	3
11039000027	11039000027	11039000027	2
11039000027	11039000027	11039000027	2
11039000027	11039000027	11039000027	2
11039000027	11039000027	11039000027	1
11039000027	11039000027	11039000027	1
11039000027	11039000027	11039000027	1
11039000027	11039000027	11039000027	1
11039000027	11039000027	11039000027	1
11039000027	11039000027	11039000027	1
11039000053	11039000053	11039000053	13
11039000053	11039000053	11039000053	9
11039000053	11039000053	11039000053	4
11039000053	11039000053	11039000053	3
11039000053	11039000053	11039000053	3
11039000053	11039000053	11039000053	3
11039000053	11039000053	11039000053	3
11039000053	11039000053	11039000053	2
11039000053	11039000053	11039000053	2
11039000053	11039000053	11039000053	1
11039000053	11039000053	11039000053	1
11039000053	11039000053	11039000053	1
11039000053	11039000053	11039000053	1
11039000084	11039000084	11039000084	6
11039000084	11039000084	11039000084	5
11039000084	11039000084	11039000084	5
11039000084	11039000084	11039000084	4
11039000084	11039000084	11039000084	2
11039000084	11039000084	11039000084	2
11039000084	11039000084	11039000084	2
11039000084	11039000084	11039000084	1
11039000084	11039000084	11039000084	1
11039000084	11039000084	11039000084	1
11053000001	11053000001	11053000001	7
11053000001	11053000001	11053000001	6
11053000001	11053000001	11053000001	3
11053000001	11053000001	11053000001	2
11053000001	11053000001	11053000001	1
11053000001	11053000001	11053000001	1
11053000001	11053000001	11053000001	1
11053000001	11053000001	11053000001	1
11053000001	11053000001	11053000001	1
11053000001	11053000001	11053000001	1
11053000006	11053000006	11053000006	10
11053000006	11053000006	11053000006	7
11053000006	11053000006	11053000006	5
11053000006	11053000006	11053000006	5
11053000006	11053000006	11053000006	5
11053000006	11053000006	11053000006	1
11053000006	11053000006	11053000006	1
11053000006	11053000006	11053000006	1
11053000006	11053000006	11053000006	1
11053000006	11053000006	11053000006	1
11053000101	11053000101	11053000101	5
11053000101	11053000101	11053000101	4
11053000101	11053000101	11053000101	4
11053000101	11053000101	11053000101	4
11053000101	11053000101	11053000101	3
11053000101	11053000101	11053000101	2
11053000101	11053000101	11053000101	2
11053000101	11053000101	11053000101	2
11053000101	11053000101	11053000101	1
11053000101	11053000101	11053000101	1
11053000101	11053000101	11053000101	1
11053000101	11053000101	11053000101	1
11053000133	11053000133	11053000133	17
11053000133	11053000133	11053000133	11
11053000133	11053000133	11053000133	8
11053000133	11053000133	11053000133	7
11053000133	11053000133	11053000133	4
11053000133	11053000133	11053000133	2
11053000133	11053000133	11053000133	2
11053000133	11053000133	11053000133	2
11053000133	11053000133	11053000133	1
11053000133	11053000133	11053000133	1
11053000133	11053000133	11053000133	1
11053000133	11053000133	11053000133	1
11053000133	11053000133	11053000133	1
11053000133	11053000133	11053000133	1
11053000133	11053000133	11053000133	1
11053000133	11053000133	11053000133	1
11053000133	11053000133	11053000133	1
11097000003	11097000003	11097000003	11
11097000003	11097000003	11097000003	4
11097000003	11097000003	11097000003	2
11097000003	11097000003	11097000003	2
11097000003	11097000003	11097000003	2
11097000003	11097000003	11097000003	1
11097000003	11097000003	11097000003	1
11097000003	11097000003	11097000003	1
11097000003	11097000003	11097000003	1
11097000003	11097000003	11097000003	1
11097000123	11097000123	11097000123	9
11097000123	11097000123	11097000123	8
11097000123	11097000123	11097000123	7
11097000123	11097000123	11097000123	2
11097000123	11097000123	11097000123	2
11097000123	11097000123	11097000123	1
11097000123	11097000123	11097000123	1
11097000123	11097000123	11097000123	1
11097000123	11097000123	11097000123	1
11097000123	11097000123	11097000123	1
11097000123	11097000123	11097000123	1
11129000001	11129000001	11129000001	14
11129000001	11129000001	11129000001	11
11129000001	11129000001	11129000001	10
11129000001	11129000001	11129000001	3
11129000001	11129000001	11129000001	2
11129000001	11129000001	11129000001	1
11129000001	11129000001	11129000001	1
11129000001	11129000001	11129000001	1
11129000001	11129000001	11129000001	1
11129000001	11129000001	11129000001	1
11129000001	11129000001	11129000001	1
11129000001	11129000001	11129000001	1
11129000001	11129000001	11129000001	1
11129000006	11129000006	11129000006	18
11129000006	11129000006	11129000006	4
11129000006	11129000006	11129000006	3
11129000006	11129000006	11129000006	2
11129000006	11129000006	11129000006	1
11129000006	11129000006	11129000006	1
11129000006	11129000006	11129000006	1
11129000006	11129000006	11129000006	1
11129000006	11129000006	11129000006	1
11129000006	11129000006	11129000006	1
11129000006	11129000006	11129000006	1
11129000013	11129000013	11129000013	10
11129000013	11129000013	11129000013	5
11129000013	11129000013	11129000013	4
11129000013	11129000013	11129000013	4
11129000013	11129000013	11129000013	3
11129000013	11129000013	11129000013	2
11129000013	11129000013	11129000013	2
11129000013	11129000013	11129000013	1
11129000013	11129000013	11129000013	1
11129000013	11129000013	11129000013	1
11129000027	11129000027	11129000027	19
11129000027	11129000027	11129000027	10
11129000027	11129000027	11129000027	4
11129000027	11129000027	11129000027	4
11129000027	11129000027	11129000027	3
11129000027	11129000027	11129000027	3
11129000027	11129000027	11129000027	3
11129000027	11129000027	11129000027	2
11129000027	11129000027	11129000027	2
11129000027	11129000027	11129000027	2
11129000027	11129000027	11129000027	1
11129000027	11129000027	11129000027	1
11129000032	11129000032	11129000032	12
11129000032	11129000032	11129000032	8
11129000032	11129000032	11129000032	8
11129000032	11129000032	11129000032	4
11129000032	11129000032	11129000032	3
11129000032	11129000032	11129000032	3
11129000032	11129000032	11129000032	3
11129000032	11129000032	11129000032	2
11129000032	11129000032	11129000032	1
11129000032	11129000032	11129000032	1
11129000035	11129000035	11129000035	10
11129000035	11129000035	11129000035	10
11129000035	11129000035	11129000035	4
11129000035	11129000035	11129000035	4
11129000035	11129000035	11129000035	4
11129000035	11129000035	11129000035	3
11129000035	11129000035	11129000035	2
11129000035	11129000035	11129000035	2
11129000035	11129000035	11129000035	1
11129000035	11129000035	11129000035	1
11129000035	11129000035	11129000035	1
11129000035	11129000035	11129000035	1
11129000036	11129000036	11129000036	9
11129000036	11129000036	11129000036	4
11129000036	11129000036	11129000036	3
11129000036	11129000036	11129000036	3
11129000036	11129000036	11129000036	3
11129000036	11129000036	11129000036	3
11129000036	11129000036	11129000036	2
11129000036	11129000036	11129000036	1
11129000036	11129000036	11129000036	1
11129000036	11129000036	11129000036	1
11129000036	11129000036	11129000036	1
11129000036	11129000036	11129000036	1
11129000039	11129000039	11129000039	9
11129000039	11129000039	11129000039	5
11129000039	11129000039	11129000039	2
11129000039	11129000039	11129000039	2
11129000039	11129000039	11129000039	2
11129000039	11129000039	11129000039	1
11129000039	11129000039	11129000039	1
11129000039	11129000039	11129000039	1
11129000039	11129000039	11129000039	1
11129000039	11129000039	11129000039	1
11129000057	11129000057	11129000057	10
11129000057	11129000057	11129000057	10
11129000057	11129000057	11129000057	4
11129000057	11129000057	11129000057	4
11129000057	11129000057	11129000057	3
11129000057	11129000057	11129000057	2
11129000057	11129000057	11129000057	2
11129000057	11129000057	11129000057	1
11129000057	11129000057	11129000057	1
11129000057	11129000057	11129000057	1
11129000057	11129000057	11129000057	1
11129000060	11129000060	11129000060	8
11129000060	11129000060	11129000060	7
11129000060	11129000060	11129000060	6
11129000060	11129000060	11129000060	3
11129000060	11129000060	11129000060	3
11129000060	11129000060	11129000060	2
11129000060	11129000060	11129000060	2
11129000060	11129000060	11129000060	1
11129000060	11129000060	11129000060	1
11129000060	11129000060	11129000060	1
11129000060	11129000060	11129000060	1
11129000060	11129000060	11129000060	1
11129000070	11129000070	11129000070	11
11129000070	11129000070	11129000070	4
11129000070	11129000070	11129000070	2
11129000070	11129000070	11129000070	2
11129000070	11129000070	11129000070	1
11129000070	11129000070	11129000070	1
11129000070	11129000070	11129000070	1
11129000070	11129000070	11129000070	1
11129000070	11129000070	11129000070	1
11129000070	11129000070	11129000070	1
11129000074	11129000074	11129000074	12
11129000074	11129000074	11129000074	11
11129000074	11129000074	11129000074	9
11129000074	11129000074	11129000074	7
11129000074	11129000074	11129000074	5
11129000074	11129000074	11129000074	4
11129000074	11129000074	11129000074	2
11129000074	11129000074	11129000074	2
11129000074	11129000074	11129000074	1
11129000074	11129000074	11129000074	1
11129000075	11129000075	11129000075	11
11129000075	11129000075	11129000075	5
11129000075	11129000075	11129000075	4
11129000075	11129000075	11129000075	4
11129000075	11129000075	11129000075	2
11129000075	11129000075	11129000075	2
11129000075	11129000075	11129000075	2
11129000075	11129000075	11129000075	2
11129000075	11129000075	11129000075	1
11129000075	11129000075	11129000075	1
11129000077	11129000077	11129000077	3
11129000077	11129000077	11129000077	2
11129000077	11129000077	11129000077	2
11129000077	11129000077	11129000077	2
11129000077	11129000077	11129000077	1
11129000077	11129000077	11129000077	1
11129000077	11129000077	11129000077	1
11129000077	11129000077	11129000077	1
11129000077	11129000077	11129000077	1
11129000077	11129000077	11129000077	1
11129000080	11129000080	11129000080	10
11129000080	11129000080	11129000080	5
11129000080	11129000080	11129000080	4
11129000080	11129000080	11129000080	2
11129000080	11129000080	11129000080	2
11129000080	11129000080	11129000080	1
11129000080	11129000080	11129000080	1
11129000080	11129000080	11129000080	1
11129000080	11129000080	11129000080	1
11129000080	11129000080	11129000080	1
11129000080	11129000080	11129000080	1
11129000089	11129000089	11129000089	11
11129000089	11129000089	11129000089	10
11129000089	11129000089	11129000089	7
11129000089	11129000089	11129000089	7
11129000089	11129000089	11129000089	6
11129000089	11129000089	11129000089	2
11129000089	11129000089	11129000089	1
11129000089	11129000089	11129000089	1
11129000089	11129000089	11129000089	1
11129000089	11129000089	11129000089	1
11129000089	11129000089	11129000089	1
11129000102	11129000102	11129000102	21
11129000102	11129000102	11129000102	7
11129000102	11129000102	11129000102	7
11129000102	11129000102	11129000102	4
11129000102	11129000102	11129000102	3
11129000102	11129000102	11129000102	3
11129000102	11129000102	11129000102	3
11129000102	11129000102	11129000102	1
11129000102	11129000102	11129000102	1
11129000102	11129000102	11129000102	1
11129000102	11129000102	11129000102	1
11129000102	11129000102	11129000102	1
11129000102	11129000102	11129000102	1
11129000117	11129000117	11129000117	9
11129000117	11129000117	11129000117	4
11129000117	11129000117	11129000117	3
11129000117	11129000117	11129000117	3
11129000117	11129000117	11129000117	1
11129000117	11129000117	11129000117	1
11129000117	11129000117	11129000117	1
11129000117	11129000117	11129000117	1
11129000117	11129000117	11129000117	1
11129000117	11129000117	11129000117	1
11129000117	11129000117	11129000117	1
11129000118	11129000118	11129000118	7
11129000118	11129000118	11129000118	7
11129000118	11129000118	11129000118	6
11129000118	11129000118	11129000118	6
11129000118	11129000118	11129000118	2
11129000118	11129000118	11129000118	2
11129000118	11129000118	11129000118	1
11129000118	11129000118	11129000118	1
11129000118	11129000118	11129000118	1
11129000118	11129000118	11129000118	1
12023000006	12023000006	12023000006	5
12023000006	12023000006	12023000006	4
12023000006	12023000006	12023000006	3
12023000006	12023000006	12023000006	3
12023000006	12023000006	12023000006	2
12023000006	12023000006	12023000006	1
12023000006	12023000006	12023000006	1
12023000006	12023000006	12023000006	1
12023000006	12023000006	12023000006	1
12023000006	12023000006	12023000006	1
12023000006	12023000006	12023000006	1
12023000006	12023000006	12023000006	1
12023000006	12023000006	12023000006	1
12023000008	12023000008	12023000008	7
12023000008	12023000008	12023000008	5
12023000008	12023000008	12023000008	4
12023000008	12023000008	12023000008	4
12023000008	12023000008	12023000008	3
12023000008	12023000008	12023000008	2
12023000008	12023000008	12023000008	2
12023000008	12023000008	12023000008	2
12023000008	12023000008	12023000008	1
12023000008	12023000008	12023000008	1
12023000008	12023000008	12023000008	1
12023000009	12023000009	12023000009	10
12023000009	12023000009	12023000009	9
12023000009	12023000009	12023000009	8
12023000009	12023000009	12023000009	6
12023000009	12023000009	12023000009	6
12023000009	12023000009	12023000009	5
12023000009	12023000009	12023000009	4
12023000009	12023000009	12023000009	3
12023000009	12023000009	12023000009	2
12023000009	12023000009	12023000009	1
12023000009	12023000009	12023000009	1
12023000009	12023000009	12023000009	1
12023000009	12023000009	12023000009	1
12023000009	12023000009	12023000009	1
12023000016	12023000016	12023000016	13
12023000016	12023000016	12023000016	13
12023000016	12023000016	12023000016	7
12023000016	12023000016	12023000016	5
12023000016	12023000016	12023000016	4
12023000016	12023000016	12023000016	3
12023000016	12023000016	12023000016	2
12023000016	12023000016	12023000016	2
12023000016	12023000016	12023000016	2
12023000016	12023000016	12023000016	1
12023000016	12023000016	12023000016	1
12023000016	12023000016	12023000016	1
12023000016	12023000016	12023000016	1
12023000016	12023000016	12023000016	1
12023000019	12023000019	12023000019	3
12023000019	12023000019	12023000019	2
12023000019	12023000019	12023000019	2
12023000019	12023000019	12023000019	1
12023000019	12023000019	12023000019	1
12023000019	12023000019	12023000019	1
12023000019	12023000019	12023000019	1
12023000019	12023000019	12023000019	1
12023000019	12023000019	12023000019	1
12023000019	12023000019	12023000019	1
12023000019	12023000019	12023000019	1
12023000019	12023000019	12023000019	1
12023000019	12023000019	12023000019	1
12023000019	12023000019	12023000019	1
12023000019	12023000019	12023000019	1
12023000021	12023000021	12023000021	20
12023000021	12023000021	12023000021	4
12023000021	12023000021	12023000021	3
12023000021	12023000021	12023000021	2
12023000021	12023000021	12023000021	2
12023000021	12023000021	12023000021	2
12023000021	12023000021	12023000021	1
12023000021	12023000021	12023000021	1
12023000021	12023000021	12023000021	1
12023000021	12023000021	12023000021	1
12023000023	12023000023	12023000023	16
12023000023	12023000023	12023000023	4
12023000023	12023000023	12023000023	2
12023000023	12023000023	12023000023	2
12023000023	12023000023	12023000023	2
12023000023	12023000023	12023000023	1
12023000023	12023000023	12023000023	1
12023000023	12023000023	12023000023	1
12023000023	12023000023	12023000023	1
12023000023	12023000023	12023000023	1
12023000023	12023000023	12023000023	1
12023000023	12023000023	12023000023	1
12023000032	12023000032	12023000032	5
12023000032	12023000032	12023000032	4
12023000032	12023000032	12023000032	3
12023000032	12023000032	12023000032	3
12023000032	12023000032	12023000032	3
12023000032	12023000032	12023000032	2
12023000032	12023000032	12023000032	2
12023000032	12023000032	12023000032	1
12023000032	12023000032	12023000032	1
12023000032	12023000032	12023000032	1
12023000036	12023000036	12023000036	10
12023000036	12023000036	12023000036	9
12023000036	12023000036	12023000036	8
12023000036	12023000036	12023000036	5
12023000036	12023000036	12023000036	2
12023000036	12023000036	12023000036	2
12023000036	12023000036	12023000036	1
12023000036	12023000036	12023000036	1
12023000036	12023000036	12023000036	1
12023000036	12023000036	12023000036	1
12023000037	12023000037	12023000037	32
12023000037	12023000037	12023000037	5
12023000037	12023000037	12023000037	4
12023000037	12023000037	12023000037	3
12023000037	12023000037	12023000037	3
12023000037	12023000037	12023000037	3
12023000037	12023000037	12023000037	1
12023000037	12023000037	12023000037	1
12023000037	12023000037	12023000037	1
12023000037	12023000037	12023000037	1
12023000038	12023000038	12023000038	25
12023000038	12023000038	12023000038	3
12023000038	12023000038	12023000038	3
12023000038	12023000038	12023000038	3
12023000038	12023000038	12023000038	2
12023000038	12023000038	12023000038	2
12023000038	12023000038	12023000038	1
12023000038	12023000038	12023000038	1
12023000038	12023000038	12023000038	1
12023000038	12023000038	12023000038	1
12023000038	12023000038	12023000038	1
12023000039	12023000039	12023000039	8
12023000039	12023000039	12023000039	6
12023000039	12023000039	12023000039	5
12023000039	12023000039	12023000039	2
12023000039	12023000039	12023000039	2
12023000039	12023000039	12023000039	1
12023000039	12023000039	12023000039	1
12023000039	12023000039	12023000039	1
12023000039	12023000039	12023000039	1
12023000039	12023000039	12023000039	1
12023000048	12023000048	12023000048	13
12023000048	12023000048	12023000048	5
12023000048	12023000048	12023000048	4
12023000048	12023000048	12023000048	3
12023000048	12023000048	12023000048	2
12023000048	12023000048	12023000048	1
12023000048	12023000048	12023000048	1
12023000048	12023000048	12023000048	1
12023000048	12023000048	12023000048	1
12023000048	12023000048	12023000048	1
12023000048	12023000048	12023000048	1
12023000049	12023000049	12023000049	9
12023000049	12023000049	12023000049	6
12023000049	12023000049	12023000049	4
12023000049	12023000049	12023000049	3
12023000049	12023000049	12023000049	2
12023000049	12023000049	12023000049	2
12023000049	12023000049	12023000049	1
12023000049	12023000049	12023000049	1
12023000049	12023000049	12023000049	1
12023000049	12023000049	12023000049	1
12023000049	12023000049	12023000049	1
12023000049	12023000049	12023000049	1
12023000054	12023000054	12023000054	10
12023000054	12023000054	12023000054	4
12023000054	12023000054	12023000054	4
12023000054	12023000054	12023000054	4
12023000054	12023000054	12023000054	4
12023000054	12023000054	12023000054	3
12023000054	12023000054	12023000054	2
12023000054	12023000054	12023000054	2
12023000054	12023000054	12023000054	1
12023000054	12023000054	12023000054	1
12023000054	12023000054	12023000054	1
12023000054	12023000054	12023000054	1
12023000054	12023000054	12023000054	1
12023000054	12023000054	12023000054	1
12023000059	12023000059	12023000059	13
12023000059	12023000059	12023000059	7
12023000059	12023000059	12023000059	4
12023000059	12023000059	12023000059	3
12023000059	12023000059	12023000059	3
12023000059	12023000059	12023000059	3
12023000059	12023000059	12023000059	3
12023000059	12023000059	12023000059	2
12023000059	12023000059	12023000059	2
12023000059	12023000059	12023000059	2
12023000059	12023000059	12023000059	2
12023000059	12023000059	12023000059	1
12023000059	12023000059	12023000059	1
12023000059	12023000059	12023000059	1
12023000059	12023000059	12023000059	1
12023000059	12023000059	12023000059	1
12023000059	12023000059	12023000059	1
12023000059	12023000059	12023000059	1
12023000063	12023000063	12023000063	4
12023000063	12023000063	12023000063	3
12023000063	12023000063	12023000063	2
12023000063	12023000063	12023000063	2
12023000063	12023000063	12023000063	2
12023000063	12023000063	12023000063	2
12023000063	12023000063	12023000063	1
12023000063	12023000063	12023000063	1
12023000063	12023000063	12023000063	1
12023000063	12023000063	12023000063	1
12023000063	12023000063	12023000063	1
12023000064	12023000064	12023000064	10
12023000064	12023000064	12023000064	7
12023000064	12023000064	12023000064	5
12023000064	12023000064	12023000064	3
12023000064	12023000064	12023000064	3
12023000064	12023000064	12023000064	2
12023000064	12023000064	12023000064	2
12023000064	12023000064	12023000064	1
12023000064	12023000064	12023000064	1
12023000064	12023000064	12023000064	1
12023000064	12023000064	12023000064	1
12023000064	12023000064	12023000064	1
12023000064	12023000064	12023000064	1
12023000064	12023000064	12023000064	1
12023000064	12023000064	12023000064	1
12023000065	12023000065	12023000065	8
12023000065	12023000065	12023000065	5
12023000065	12023000065	12023000065	3
12023000065	12023000065	12023000065	2
12023000065	12023000065	12023000065	2
12023000065	12023000065	12023000065	2
12023000065	12023000065	12023000065	1
12023000065	12023000065	12023000065	1
12023000065	12023000065	12023000065	1
12023000065	12023000065	12023000065	1
12023000065	12023000065	12023000065	1
12023000065	12023000065	12023000065	1
12023000072	12023000072	12023000072	7
12023000072	12023000072	12023000072	3
12023000072	12023000072	12023000072	2
12023000072	12023000072	12023000072	2
12023000072	12023000072	12023000072	2
12023000072	12023000072	12023000072	2
12023000072	12023000072	12023000072	1
12023000072	12023000072	12023000072	1
12023000072	12023000072	12023000072	1
12023000072	12023000072	12023000072	1
12023000073	12023000073	12023000073	5
12023000073	12023000073	12023000073	5
12023000073	12023000073	12023000073	4
12023000073	12023000073	12023000073	2
12023000073	12023000073	12023000073	2
12023000073	12023000073	12023000073	1
12023000073	12023000073	12023000073	1
12023000073	12023000073	12023000073	1
12023000073	12023000073	12023000073	1
12023000073	12023000073	12023000073	1
12023000073	12023000073	12023000073	1
12023000073	12023000073	12023000073	1
12023000077	12023000077	12023000077	20
12023000077	12023000077	12023000077	7
12023000077	12023000077	12023000077	7
12023000077	12023000077	12023000077	4
12023000077	12023000077	12023000077	2
12023000077	12023000077	12023000077	1
12023000077	12023000077	12023000077	1
12023000077	12023000077	12023000077	1
12023000077	12023000077	12023000077	1
12023000077	12023000077	12023000077	1
12023000077	12023000077	12023000077	1
12023000105	12023000105	12023000105	10
12023000105	12023000105	12023000105	7
12023000105	12023000105	12023000105	6
12023000105	12023000105	12023000105	4
12023000105	12023000105	12023000105	2
12023000105	12023000105	12023000105	2
12023000105	12023000105	12023000105	1
12023000105	12023000105	12023000105	1
12023000105	12023000105	12023000105	1
12023000105	12023000105	12023000105	1
12023000105	12023000105	12023000105	1
12023000105	12023000105	12023000105	1
12023000108	12023000108	12023000108	15
12023000108	12023000108	12023000108	10
12023000108	12023000108	12023000108	8
12023000108	12023000108	12023000108	4
12023000108	12023000108	12023000108	3
12023000108	12023000108	12023000108	3
12023000108	12023000108	12023000108	2
12023000108	12023000108	12023000108	2
12023000108	12023000108	12023000108	2
12023000108	12023000108	12023000108	1
12023000108	12023000108	12023000108	1
12023000108	12023000108	12023000108	1
12023000108	12023000108	12023000108	1
12023000112	12023000112	12023000112	15
12023000112	12023000112	12023000112	8
12023000112	12023000112	12023000112	7
12023000112	12023000112	12023000112	5
12023000112	12023000112	12023000112	5
12023000112	12023000112	12023000112	4
12023000112	12023000112	12023000112	4
12023000112	12023000112	12023000112	3
12023000112	12023000112	12023000112	2
12023000112	12023000112	12023000112	2
12023000112	12023000112	12023000112	1
12023000113	12023000113	12023000113	8
12023000113	12023000113	12023000113	5
12023000113	12023000113	12023000113	4
12023000113	12023000113	12023000113	3
12023000113	12023000113	12023000113	3
12023000113	12023000113	12023000113	1
12023000113	12023000113	12023000113	1
12023000113	12023000113	12023000113	1
12023000113	12023000113	12023000113	1
12023000113	12023000113	12023000113	1
12023000116	12023000116	12023000116	9
12023000116	12023000116	12023000116	8
12023000116	12023000116	12023000116	7
12023000116	12023000116	12023000116	3
12023000116	12023000116	12023000116	2
12023000116	12023000116	12023000116	2
12023000116	12023000116	12023000116	2
12023000116	12023000116	12023000116	2
12023000116	12023000116	12023000116	2
12023000116	12023000116	12023000116	1
12023000116	12023000116	12023000116	1
12023000116	12023000116	12023000116	1
12023000116	12023000116	12023000116	1
12023000116	12023000116	12023000116	1
12023000116	12023000116	12023000116	1
12023000116	12023000116	12023000116	1
12023000117	12023000117	12023000117	6
12023000117	12023000117	12023000117	3
12023000117	12023000117	12023000117	2
12023000117	12023000117	12023000117	2
12023000117	12023000117	12023000117	2
12023000117	12023000117	12023000117	2
12023000117	12023000117	12023000117	1
12023000117	12023000117	12023000117	1
12023000117	12023000117	12023000117	1
12023000117	12023000117	12023000117	1
12023000117	12023000117	12023000117	1
12023000117	12023000117	12023000117	1
12023000117	12023000117	12023000117	1
12023000118	12023000118	12023000118	18
12023000118	12023000118	12023000118	2
12023000118	12023000118	12023000118	2
12023000118	12023000118	12023000118	2
12023000118	12023000118	12023000118	2
12023000118	12023000118	12023000118	1
12023000118	12023000118	12023000118	1
12023000118	12023000118	12023000118	1
12023000118	12023000118	12023000118	1
12023000118	12023000118	12023000118	1
12025000016	12025000016	12025000016	12
12025000016	12025000016	12025000016	12
12025000016	12025000016	12025000016	9
12025000016	12025000016	12025000016	6
12025000016	12025000016	12025000016	4
12025000016	12025000016	12025000016	3
12025000016	12025000016	12025000016	3
12025000016	12025000016	12025000016	2
12025000016	12025000016	12025000016	1
12025000016	12025000016	12025000016	1
12025000016	12025000016	12025000016	1
12025000016	12025000016	12025000016	1
12025000019	12025000019	12025000019	37
12025000019	12025000019	12025000019	5
12025000019	12025000019	12025000019	5
12025000019	12025000019	12025000019	4
12025000019	12025000019	12025000019	4
12025000019	12025000019	12025000019	2
12025000019	12025000019	12025000019	1
12025000019	12025000019	12025000019	1
12025000019	12025000019	12025000019	1
12025000019	12025000019	12025000019	1
12025000020	12025000020	12025000020	13
12025000020	12025000020	12025000020	5
12025000020	12025000020	12025000020	4
12025000020	12025000020	12025000020	4
12025000020	12025000020	12025000020	3
12025000020	12025000020	12025000020	1
12025000020	12025000020	12025000020	1
12025000020	12025000020	12025000020	1
12025000020	12025000020	12025000020	1
12025000020	12025000020	12025000020	1
12025000020	12025000020	12025000020	1
12025000020	12025000020	12025000020	1
12025000020	12025000020	12025000020	1
12025000021	12025000021	12025000021	4
12025000021	12025000021	12025000021	4
12025000021	12025000021	12025000021	4
12025000021	12025000021	12025000021	3
12025000021	12025000021	12025000021	3
12025000021	12025000021	12025000021	3
12025000021	12025000021	12025000021	2
12025000021	12025000021	12025000021	1
12025000021	12025000021	12025000021	1
12025000021	12025000021	12025000021	1
12025000022	12025000022	12025000022	9
12025000022	12025000022	12025000022	8
12025000022	12025000022	12025000022	6
12025000022	12025000022	12025000022	3
12025000022	12025000022	12025000022	3
12025000022	12025000022	12025000022	1
12025000022	12025000022	12025000022	1
12025000022	12025000022	12025000022	1
12025000022	12025000022	12025000022	1
12025000022	12025000022	12025000022	1
12025000024	12025000024	12025000024	7
12025000024	12025000024	12025000024	5
12025000024	12025000024	12025000024	4
12025000024	12025000024	12025000024	4
12025000024	12025000024	12025000024	3
12025000024	12025000024	12025000024	3
12025000024	12025000024	12025000024	2
12025000024	12025000024	12025000024	2
12025000024	12025000024	12025000024	2
12025000024	12025000024	12025000024	1
12025000024	12025000024	12025000024	1
12025000024	12025000024	12025000024	1
12025000024	12025000024	12025000024	1
12025000025	12025000025	12025000025	6
12025000025	12025000025	12025000025	5
12025000025	12025000025	12025000025	4
12025000025	12025000025	12025000025	3
12025000025	12025000025	12025000025	3
12025000025	12025000025	12025000025	1
12025000025	12025000025	12025000025	1
12025000025	12025000025	12025000025	1
12025000025	12025000025	12025000025	1
12025000025	12025000025	12025000025	1
12025000025	12025000025	12025000025	1
12025000029	12025000029	12025000029	6
12025000029	12025000029	12025000029	5
12025000029	12025000029	12025000029	2
12025000029	12025000029	12025000029	2
12025000029	12025000029	12025000029	1
12025000029	12025000029	12025000029	1
12025000029	12025000029	12025000029	1
12025000029	12025000029	12025000029	1
12025000029	12025000029	12025000029	1
12025000029	12025000029	12025000029	1
12025000029	12025000029	12025000029	1
12025000029	12025000029	12025000029	1
12025000036	12025000036	12025000036	12
12025000036	12025000036	12025000036	7
12025000036	12025000036	12025000036	4
12025000036	12025000036	12025000036	4
12025000036	12025000036	12025000036	3
12025000036	12025000036	12025000036	2
12025000036	12025000036	12025000036	2
12025000036	12025000036	12025000036	2
12025000036	12025000036	12025000036	1
12025000036	12025000036	12025000036	1
12025000038	12025000038	12025000038	7
12025000038	12025000038	12025000038	5
12025000038	12025000038	12025000038	3
12025000038	12025000038	12025000038	3
12025000038	12025000038	12025000038	3
12025000038	12025000038	12025000038	3
12025000038	12025000038	12025000038	3
12025000038	12025000038	12025000038	2
12025000038	12025000038	12025000038	2
12025000038	12025000038	12025000038	1
12025000038	12025000038	12025000038	1
12025000040	12025000040	12025000040	19
12025000040	12025000040	12025000040	11
12025000040	12025000040	12025000040	10
12025000040	12025000040	12025000040	4
12025000040	12025000040	12025000040	3
12025000040	12025000040	12025000040	3
12025000040	12025000040	12025000040	2
12025000040	12025000040	12025000040	2
12025000040	12025000040	12025000040	1
12025000040	12025000040	12025000040	1
12025000045	12025000045	12025000045	4
12025000045	12025000045	12025000045	3
12025000045	12025000045	12025000045	2
12025000045	12025000045	12025000045	2
12025000045	12025000045	12025000045	1
12025000045	12025000045	12025000045	1
12025000045	12025000045	12025000045	1
12025000045	12025000045	12025000045	1
12025000045	12025000045	12025000045	1
12025000045	12025000045	12025000045	1
12025000045	12025000045	12025000045	1
12025000046	12025000046	12025000046	54
12025000046	12025000046	12025000046	13
12025000046	12025000046	12025000046	7
12025000046	12025000046	12025000046	5
12025000046	12025000046	12025000046	4
12025000046	12025000046	12025000046	2
12025000046	12025000046	12025000046	1
12025000046	12025000046	12025000046	1
12025000046	12025000046	12025000046	1
12025000046	12025000046	12025000046	1
12025000047	12025000047	12025000047	8
12025000047	12025000047	12025000047	6
12025000047	12025000047	12025000047	5
12025000047	12025000047	12025000047	5
12025000047	12025000047	12025000047	3
12025000047	12025000047	12025000047	3
12025000047	12025000047	12025000047	2
12025000047	12025000047	12025000047	2
12025000047	12025000047	12025000047	2
12025000047	12025000047	12025000047	1
12025000047	12025000047	12025000047	1
12025000047	12025000047	12025000047	1
12025000068	12025000068	12025000068	7
12025000068	12025000068	12025000068	7
12025000068	12025000068	12025000068	6
12025000068	12025000068	12025000068	3
12025000068	12025000068	12025000068	3
12025000068	12025000068	12025000068	2
12025000068	12025000068	12025000068	2
12025000068	12025000068	12025000068	1
12025000068	12025000068	12025000068	1
12025000068	12025000068	12025000068	1
12025000084	12025000084	12025000084	5
12025000084	12025000084	12025000084	5
12025000084	12025000084	12025000084	4
12025000084	12025000084	12025000084	3
12025000084	12025000084	12025000084	2
12025000084	12025000084	12025000084	2
12025000084	12025000084	12025000084	1
12025000084	12025000084	12025000084	1
12025000084	12025000084	12025000084	1
12025000084	12025000084	12025000084	1
12025000084	12025000084	12025000084	1
12025000084	12025000084	12025000084	1
12025000087	12025000087	12025000087	5
12025000087	12025000087	12025000087	5
12025000087	12025000087	12025000087	3
12025000087	12025000087	12025000087	3
12025000087	12025000087	12025000087	2
12025000087	12025000087	12025000087	2
12025000087	12025000087	12025000087	1
12025000087	12025000087	12025000087	1
12025000087	12025000087	12025000087	1
12025000087	12025000087	12025000087	1
12025000087	12025000087	12025000087	1
12025000087	12025000087	12025000087	1
12025000087	12025000087	12025000087	1
12025000087	12025000087	12025000087	1
12025000088	12025000088	12025000088	5
12025000088	12025000088	12025000088	3
12025000088	12025000088	12025000088	2
12025000088	12025000088	12025000088	2
12025000088	12025000088	12025000088	2
12025000088	12025000088	12025000088	2
12025000088	12025000088	12025000088	2
12025000088	12025000088	12025000088	1
12025000088	12025000088	12025000088	1
12025000088	12025000088	12025000088	1
12025000088	12025000088	12025000088	1
12025000088	12025000088	12025000088	1
12025000097	12025000097	12025000097	18
12025000097	12025000097	12025000097	15
12025000097	12025000097	12025000097	6
12025000097	12025000097	12025000097	4
12025000097	12025000097	12025000097	4
12025000097	12025000097	12025000097	3
12025000097	12025000097	12025000097	2
12025000097	12025000097	12025000097	2
12025000097	12025000097	12025000097	2
12025000097	12025000097	12025000097	2
12025000097	12025000097	12025000097	1
12025000097	12025000097	12025000097	1
12025000097	12025000097	12025000097	1
12025000101	12025000101	12025000101	5
12025000101	12025000101	12025000101	5
12025000101	12025000101	12025000101	5
12025000101	12025000101	12025000101	5
12025000101	12025000101	12025000101	4
12025000101	12025000101	12025000101	4
12025000101	12025000101	12025000101	4
12025000101	12025000101	12025000101	3
12025000101	12025000101	12025000101	2
12025000101	12025000101	12025000101	2
12025000101	12025000101	12025000101	1
12025000101	12025000101	12025000101	1
12025000102	12025000102	12025000102	5
12025000102	12025000102	12025000102	3
12025000102	12025000102	12025000102	3
12025000102	12025000102	12025000102	2
12025000102	12025000102	12025000102	1
12025000102	12025000102	12025000102	1
12025000102	12025000102	12025000102	1
12025000102	12025000102	12025000102	1
12025000102	12025000102	12025000102	1
12025000102	12025000102	12025000102	1
12025000102	12025000102	12025000102	1
12025000102	12025000102	12025000102	1
12025000102	12025000102	12025000102	1
12025000102	12025000102	12025000102	1
12025000108	12025000108	12025000108	12
12025000108	12025000108	12025000108	4
12025000108	12025000108	12025000108	3
12025000108	12025000108	12025000108	3
12025000108	12025000108	12025000108	3
12025000108	12025000108	12025000108	3
12025000108	12025000108	12025000108	2
12025000108	12025000108	12025000108	2
12025000108	12025000108	12025000108	2
12025000108	12025000108	12025000108	1
12025000108	12025000108	12025000108	1
12025000108	12025000108	12025000108	1
12025000108	12025000108	12025000108	1
12025000108	12025000108	12025000108	1
12025000108	12025000108	12025000108	1
12025000110	12025000110	12025000110	8
12025000110	12025000110	12025000110	5
12025000110	12025000110	12025000110	2
12025000110	12025000110	12025000110	2
12025000110	12025000110	12025000110	2
12025000110	12025000110	12025000110	1
12025000110	12025000110	12025000110	1
12025000110	12025000110	12025000110	1
12025000110	12025000110	12025000110	1
12025000110	12025000110	12025000110	1
12025000110	12025000110	12025000110	1
12025000113	12025000113	12025000113	11
12025000113	12025000113	12025000113	10
12025000113	12025000113	12025000113	7
12025000113	12025000113	12025000113	2
12025000113	12025000113	12025000113	1
12025000113	12025000113	12025000113	1
12025000113	12025000113	12025000113	1
12025000113	12025000113	12025000113	1
12025000113	12025000113	12025000113	1
12025000113	12025000113	12025000113	1
12025000113	12025000113	12025000113	1
12025000128	12025000128	12025000128	23
12025000128	12025000128	12025000128	6
12025000128	12025000128	12025000128	5
12025000128	12025000128	12025000128	4
12025000128	12025000128	12025000128	4
12025000128	12025000128	12025000128	3
12025000128	12025000128	12025000128	2
12025000128	12025000128	12025000128	2
12025000128	12025000128	12025000128	1
12025000128	12025000128	12025000128	1
12025000128	12025000128	12025000128	1
12025000128	12025000128	12025000128	1
12025000128	12025000128	12025000128	1
12025000145	12025000145	12025000145	9
12025000145	12025000145	12025000145	8
12025000145	12025000145	12025000145	4
12025000145	12025000145	12025000145	4
12025000145	12025000145	12025000145	4
12025000145	12025000145	12025000145	4
12025000145	12025000145	12025000145	3
12025000145	12025000145	12025000145	2
12025000145	12025000145	12025000145	1
12025000145	12025000145	12025000145	1
12025000145	12025000145	12025000145	1
12025000145	12025000145	12025000145	1
12025000145	12025000145	12025000145	1
12025000148	12025000148	12025000148	11
12025000148	12025000148	12025000148	6
12025000148	12025000148	12025000148	4
12025000148	12025000148	12025000148	4
12025000148	12025000148	12025000148	3
12025000148	12025000148	12025000148	3
12025000148	12025000148	12025000148	2
12025000148	12025000148	12025000148	2
12025000148	12025000148	12025000148	2
12025000148	12025000148	12025000148	2
12025000148	12025000148	12025000148	2
12025000148	12025000148	12025000148	2
12025000148	12025000148	12025000148	1
12025000148	12025000148	12025000148	1
12025000148	12025000148	12025000148	1
12025000148	12025000148	12025000148	1
12025000148	12025000148	12025000148	1
12025000149	12025000149	12025000149	11
12025000149	12025000149	12025000149	9
12025000149	12025000149	12025000149	6
12025000149	12025000149	12025000149	4
12025000149	12025000149	12025000149	4
12025000149	12025000149	12025000149	3
12025000149	12025000149	12025000149	2
12025000149	12025000149	12025000149	2
12025000149	12025000149	12025000149	2
12025000149	12025000149	12025000149	2
12025000149	12025000149	12025000149	1
12025000149	12025000149	12025000149	1
12025000149	12025000149	12025000149	1
12025000149	12025000149	12025000149	1
12025000149	12025000149	12025000149	1
12025000150	12025000150	12025000150	27
12025000150	12025000150	12025000150	7
12025000150	12025000150	12025000150	5
12025000150	12025000150	12025000150	4
12025000150	12025000150	12025000150	4
12025000150	12025000150	12025000150	2
12025000150	12025000150	12025000150	2
12025000150	12025000150	12025000150	1
12025000150	12025000150	12025000150	1
12025000150	12025000150	12025000150	1
12025000155	12025000155	12025000155	22
12025000155	12025000155	12025000155	13
12025000155	12025000155	12025000155	5
12025000155	12025000155	12025000155	4
12025000155	12025000155	12025000155	3
12025000155	12025000155	12025000155	2
12025000155	12025000155	12025000155	1
12025000155	12025000155	12025000155	1
12025000155	12025000155	12025000155	1
12025000155	12025000155	12025000155	1
12025000155	12025000155	12025000155	1
12025000155	12025000155	12025000155	1
12025000155	12025000155	12025000155	1
12025000155	12025000155	12025000155	1
12025000156	12025000156	12025000156	16
12025000156	12025000156	12025000156	11
12025000156	12025000156	12025000156	5
12025000156	12025000156	12025000156	4
12025000156	12025000156	12025000156	3
12025000156	12025000156	12025000156	2
12025000156	12025000156	12025000156	2
12025000156	12025000156	12025000156	1
12025000156	12025000156	12025000156	1
12025000156	12025000156	12025000156	1
12025000156	12025000156	12025000156	1
12025000156	12025000156	12025000156	1
12025000156	12025000156	12025000156	1
12025000156	12025000156	12025000156	1
12025000164	12025000164	12025000164	13
12025000164	12025000164	12025000164	5
12025000164	12025000164	12025000164	4
12025000164	12025000164	12025000164	4
12025000164	12025000164	12025000164	3
12025000164	12025000164	12025000164	2
12025000164	12025000164	12025000164	1
12025000164	12025000164	12025000164	1
12025000164	12025000164	12025000164	1
12025000164	12025000164	12025000164	1
12025000164	12025000164	12025000164	1
12025000164	12025000164	12025000164	1
12025000164	12025000164	12025000164	1
12025000166	12025000166	12025000166	26
12025000166	12025000166	12025000166	18
12025000166	12025000166	12025000166	7
12025000166	12025000166	12025000166	3
12025000166	12025000166	12025000166	3
12025000166	12025000166	12025000166	2
12025000166	12025000166	12025000166	2
12025000166	12025000166	12025000166	2
12025000166	12025000166	12025000166	1
12025000166	12025000166	12025000166	1
12025000166	12025000166	12025000166	1
12025000166	12025000166	12025000166	1
12025000166	12025000166	12025000166	1
12025000166	12025000166	12025000166	1
12035000016	12035000016	12035000016	7
12035000016	12035000016	12035000016	5
12035000016	12035000016	12035000016	4
12035000016	12035000016	12035000016	4
12035000016	12035000016	12035000016	4
12035000016	12035000016	12035000016	3
12035000016	12035000016	12035000016	3
12035000016	12035000016	12035000016	3
12035000016	12035000016	12035000016	2
12035000016	12035000016	12035000016	1
12035000016	12035000016	12035000016	1
12035000016	12035000016	12035000016	1
12035000022	12035000022	12035000022	18
12035000022	12035000022	12035000022	11
12035000022	12035000022	12035000022	6
12035000022	12035000022	12035000022	5
12035000022	12035000022	12035000022	3
12035000022	12035000022	12035000022	3
12035000022	12035000022	12035000022	3
12035000022	12035000022	12035000022	1
12035000022	12035000022	12035000022	1
12035000022	12035000022	12035000022	1
12035000031	12035000031	12035000031	5
12035000031	12035000031	12035000031	5
12035000031	12035000031	12035000031	3
12035000031	12035000031	12035000031	2
12035000031	12035000031	12035000031	2
12035000031	12035000031	12035000031	2
12035000031	12035000031	12035000031	2
12035000031	12035000031	12035000031	2
12035000031	12035000031	12035000031	1
12035000031	12035000031	12035000031	1
12035000031	12035000031	12035000031	1
12035000036	12035000036	12035000036	6
12035000036	12035000036	12035000036	4
12035000036	12035000036	12035000036	4
12035000036	12035000036	12035000036	3
12035000036	12035000036	12035000036	2
12035000036	12035000036	12035000036	2
12035000036	12035000036	12035000036	2
12035000036	12035000036	12035000036	1
12035000036	12035000036	12035000036	1
12035000036	12035000036	12035000036	1
12035000036	12035000036	12035000036	1
12035000036	12035000036	12035000036	1
12035000037	12035000037	12035000037	14
12035000037	12035000037	12035000037	6
12035000037	12035000037	12035000037	6
12035000037	12035000037	12035000037	5
12035000037	12035000037	12035000037	3
12035000037	12035000037	12035000037	2
12035000037	12035000037	12035000037	2
12035000037	12035000037	12035000037	2
12035000037	12035000037	12035000037	1
12035000037	12035000037	12035000037	1
12035000037	12035000037	12035000037	1
12035000037	12035000037	12035000037	1
12035000045	12035000045	12035000045	8
12035000045	12035000045	12035000045	4
12035000045	12035000045	12035000045	4
12035000045	12035000045	12035000045	3
12035000045	12035000045	12035000045	3
12035000045	12035000045	12035000045	2
12035000045	12035000045	12035000045	2
12035000045	12035000045	12035000045	2
12035000045	12035000045	12035000045	1
12035000045	12035000045	12035000045	1
12035000045	12035000045	12035000045	1
12035000045	12035000045	12035000045	1
12035000045	12035000045	12035000045	1
12035000046	12035000046	12035000046	11
12035000046	12035000046	12035000046	10
12035000046	12035000046	12035000046	8
12035000046	12035000046	12035000046	6
12035000046	12035000046	12035000046	4
12035000046	12035000046	12035000046	2
12035000046	12035000046	12035000046	2
12035000046	12035000046	12035000046	1
12035000046	12035000046	12035000046	1
12035000046	12035000046	12035000046	1
12035000051	12035000051	12035000051	26
12035000051	12035000051	12035000051	7
12035000051	12035000051	12035000051	4
12035000051	12035000051	12035000051	4
12035000051	12035000051	12035000051	2
12035000051	12035000051	12035000051	2
12035000051	12035000051	12035000051	1
12035000051	12035000051	12035000051	1
12035000051	12035000051	12035000051	1
12035000051	12035000051	12035000051	1
12035000072	12035000072	12035000072	7
12035000072	12035000072	12035000072	3
12035000072	12035000072	12035000072	3
12035000072	12035000072	12035000072	2
12035000072	12035000072	12035000072	2
12035000072	12035000072	12035000072	1
12035000072	12035000072	12035000072	1
12035000072	12035000072	12035000072	1
12035000072	12035000072	12035000072	1
12035000072	12035000072	12035000072	1
12035000072	12035000072	12035000072	1
12035000072	12035000072	12035000072	1
12035000072	12035000072	12035000072	1
12035000079	12035000079	12035000079	14
12035000079	12035000079	12035000079	8
12035000079	12035000079	12035000079	7
12035000079	12035000079	12035000079	3
12035000079	12035000079	12035000079	2
12035000079	12035000079	12035000079	2
12035000079	12035000079	12035000079	2
12035000079	12035000079	12035000079	2
12035000079	12035000079	12035000079	1
12035000079	12035000079	12035000079	1
12035000079	12035000079	12035000079	1
12035000080	12035000080	12035000080	11
12035000080	12035000080	12035000080	10
12035000080	12035000080	12035000080	3
12035000080	12035000080	12035000080	3
12035000080	12035000080	12035000080	2
12035000080	12035000080	12035000080	2
12035000080	12035000080	12035000080	1
12035000080	12035000080	12035000080	1
12035000080	12035000080	12035000080	1
12035000080	12035000080	12035000080	1
12035000080	12035000080	12035000080	1
12035000080	12035000080	12035000080	1
12035000080	12035000080	12035000080	1
12035000080	12035000080	12035000080	1
12035000080	12035000080	12035000080	1
12035000080	12035000080	12035000080	1
12035000090	12035000090	12035000090	5
12035000090	12035000090	12035000090	4
12035000090	12035000090	12035000090	4
12035000090	12035000090	12035000090	4
12035000090	12035000090	12035000090	2
12035000090	12035000090	12035000090	2
12035000090	12035000090	12035000090	1
12035000090	12035000090	12035000090	1
12035000090	12035000090	12035000090	1
12035000090	12035000090	12035000090	1
12035000090	12035000090	12035000090	1
12035000100	12035000100	12035000100	17
12035000100	12035000100	12035000100	6
12035000100	12035000100	12035000100	4
12035000100	12035000100	12035000100	4
12035000100	12035000100	12035000100	3
12035000100	12035000100	12035000100	1
12035000100	12035000100	12035000100	1
12035000100	12035000100	12035000100	1
12035000100	12035000100	12035000100	1
12035000100	12035000100	12035000100	1
12035000100	12035000100	12035000100	1
12035000100	12035000100	12035000100	1
12035000102	12035000102	12035000102	10
12035000102	12035000102	12035000102	8
12035000102	12035000102	12035000102	6
12035000102	12035000102	12035000102	5
12035000102	12035000102	12035000102	4
12035000102	12035000102	12035000102	4
12035000102	12035000102	12035000102	3
12035000102	12035000102	12035000102	3
12035000102	12035000102	12035000102	2
12035000102	12035000102	12035000102	2
12091000009	12091000009	12091000009	4
12091000009	12091000009	12091000009	3
12091000009	12091000009	12091000009	2
12091000009	12091000009	12091000009	2
12091000009	12091000009	12091000009	1
12091000009	12091000009	12091000009	1
12091000009	12091000009	12091000009	1
12091000009	12091000009	12091000009	1
12091000009	12091000009	12091000009	1
12091000009	12091000009	12091000009	1
12091000009	12091000009	12091000009	1
12091000009	12091000009	12091000009	1
12091000009	12091000009	12091000009	1
12091000009	12091000009	12091000009	1
12091000009	12091000009	12091000009	1
12091000010	12091000010	12091000010	5
12091000010	12091000010	12091000010	3
12091000010	12091000010	12091000010	3
12091000010	12091000010	12091000010	2
12091000010	12091000010	12091000010	2
12091000010	12091000010	12091000010	1
12091000010	12091000010	12091000010	1
12091000010	12091000010	12091000010	1
12091000010	12091000010	12091000010	1
12091000010	12091000010	12091000010	1
12091000010	12091000010	12091000010	1
12091000020	12091000020	12091000020	11
12091000020	12091000020	12091000020	6
12091000020	12091000020	12091000020	5
12091000020	12091000020	12091000020	3
12091000020	12091000020	12091000020	2
12091000020	12091000020	12091000020	1
12091000020	12091000020	12091000020	1
12091000020	12091000020	12091000020	1
12091000020	12091000020	12091000020	1
12091000020	12091000020	12091000020	1
12091000020	12091000020	12091000020	1
12091000027	12091000027	12091000027	8
12091000027	12091000027	12091000027	5
12091000027	12091000027	12091000027	3
12091000027	12091000027	12091000027	3
12091000027	12091000027	12091000027	2
12091000027	12091000027	12091000027	2
12091000027	12091000027	12091000027	2
12091000027	12091000027	12091000027	1
12091000027	12091000027	12091000027	1
12091000027	12091000027	12091000027	1
12091000027	12091000027	12091000027	1
12091000027	12091000027	12091000027	1
12091000027	12091000027	12091000027	1
12091000027	12091000027	12091000027	1
12091000027	12091000027	12091000027	1
12091000032	12091000032	12091000032	8
12091000032	12091000032	12091000032	5
12091000032	12091000032	12091000032	3
12091000032	12091000032	12091000032	2
12091000032	12091000032	12091000032	2
12091000032	12091000032	12091000032	1
12091000032	12091000032	12091000032	1
12091000032	12091000032	12091000032	1
12091000032	12091000032	12091000032	1
12091000032	12091000032	12091000032	1
12091000032	12091000032	12091000032	1
12091000034	12091000034	12091000034	14
12091000034	12091000034	12091000034	7
12091000034	12091000034	12091000034	7
12091000034	12091000034	12091000034	5
12091000034	12091000034	12091000034	2
12091000034	12091000034	12091000034	2
12091000034	12091000034	12091000034	1
12091000034	12091000034	12091000034	1
12091000034	12091000034	12091000034	1
12091000034	12091000034	12091000034	1
12091000034	12091000034	12091000034	1
12091000034	12091000034	12091000034	1
12091000034	12091000034	12091000034	1
12091000034	12091000034	12091000034	1
12091000037	12091000037	12091000037	14
12091000037	12091000037	12091000037	3
12091000037	12091000037	12091000037	3
12091000037	12091000037	12091000037	3
12091000037	12091000037	12091000037	2
12091000037	12091000037	12091000037	2
12091000037	12091000037	12091000037	2
12091000037	12091000037	12091000037	2
12091000037	12091000037	12091000037	1
12091000037	12091000037	12091000037	1
12091000043	12091000043	12091000043	27
12091000043	12091000043	12091000043	7
12091000043	12091000043	12091000043	4
12091000043	12091000043	12091000043	4
12091000043	12091000043	12091000043	3
12091000043	12091000043	12091000043	1
12091000043	12091000043	12091000043	1
12091000043	12091000043	12091000043	1
12091000043	12091000043	12091000043	1
12091000043	12091000043	12091000043	1
12091000043	12091000043	12091000043	1
12091000043	12091000043	12091000043	1
12091000050	12091000050	12091000050	6
12091000050	12091000050	12091000050	5
12091000050	12091000050	12091000050	5
12091000050	12091000050	12091000050	5
12091000050	12091000050	12091000050	4
12091000050	12091000050	12091000050	3
12091000050	12091000050	12091000050	2
12091000050	12091000050	12091000050	1
12091000050	12091000050	12091000050	1
12091000050	12091000050	12091000050	1
12091000050	12091000050	12091000050	1
12091000050	12091000050	12091000050	1
12091000050	12091000050	12091000050	1
12091000050	12091000050	12091000050	1
12091000057	12091000057	12091000057	12
12091000057	12091000057	12091000057	5
12091000057	12091000057	12091000057	4
12091000057	12091000057	12091000057	3
12091000057	12091000057	12091000057	1
12091000057	12091000057	12091000057	1
12091000057	12091000057	12091000057	1
12091000057	12091000057	12091000057	1
12091000057	12091000057	12091000057	1
12091000057	12091000057	12091000057	1
12091000057	12091000057	12091000057	1
12091000057	12091000057	12091000057	1
12091000059	12091000059	12091000059	24
12091000059	12091000059	12091000059	6
12091000059	12091000059	12091000059	4
12091000059	12091000059	12091000059	3
12091000059	12091000059	12091000059	3
12091000059	12091000059	12091000059	2
12091000059	12091000059	12091000059	1
12091000059	12091000059	12091000059	1
12091000059	12091000059	12091000059	1
12091000059	12091000059	12091000059	1
12091000094	12091000094	12091000094	7
12091000094	12091000094	12091000094	3
12091000094	12091000094	12091000094	2
12091000094	12091000094	12091000094	1
12091000094	12091000094	12091000094	1
12091000094	12091000094	12091000094	1
12091000094	12091000094	12091000094	1
12091000094	12091000094	12091000094	1
12091000094	12091000094	12091000094	1
12091000094	12091000094	12091000094	1
12091000094	12091000094	12091000094	1
12091000094	12091000094	12091000094	1
12091000095	12091000095	12091000095	7
12091000095	12091000095	12091000095	3
12091000095	12091000095	12091000095	3
12091000095	12091000095	12091000095	3
12091000095	12091000095	12091000095	3
12091000095	12091000095	12091000095	2
12091000095	12091000095	12091000095	2
12091000095	12091000095	12091000095	2
12091000095	12091000095	12091000095	1
12091000095	12091000095	12091000095	1
12091000095	12091000095	12091000095	1
12091000095	12091000095	12091000095	1
12091000095	12091000095	12091000095	1
12091000095	12091000095	12091000095	1
12091000095	12091000095	12091000095	1
12091000095	12091000095	12091000095	1
12091000095	12091000095	12091000095	1
12091000099	12091000099	12091000099	5
12091000099	12091000099	12091000099	3
12091000099	12091000099	12091000099	2
12091000099	12091000099	12091000099	1
12091000099	12091000099	12091000099	1
12091000099	12091000099	12091000099	1
12091000099	12091000099	12091000099	1
12091000099	12091000099	12091000099	1
12091000099	12091000099	12091000099	1
12091000099	12091000099	12091000099	1
12091000099	12091000099	12091000099	1
12091000100	12091000100	12091000100	4
12091000100	12091000100	12091000100	4
12091000100	12091000100	12091000100	3
12091000100	12091000100	12091000100	1
12091000100	12091000100	12091000100	1
12091000100	12091000100	12091000100	1
12091000100	12091000100	12091000100	1
12091000100	12091000100	12091000100	1
12091000100	12091000100	12091000100	1
12091000100	12091000100	12091000100	1
12091000100	12091000100	12091000100	1
12091000113	12091000113	12091000113	7
12091000113	12091000113	12091000113	4
12091000113	12091000113	12091000113	3
12091000113	12091000113	12091000113	1
12091000113	12091000113	12091000113	1
12091000113	12091000113	12091000113	1
12091000113	12091000113	12091000113	1
12091000113	12091000113	12091000113	1
12091000113	12091000113	12091000113	1
12091000113	12091000113	12091000113	1
12091000113	12091000113	12091000113	1
12091000113	12091000113	12091000113	1
12091000129	12091000129	12091000129	6
12091000129	12091000129	12091000129	6
12091000129	12091000129	12091000129	4
12091000129	12091000129	12091000129	4
12091000129	12091000129	12091000129	3
12091000129	12091000129	12091000129	1
12091000129	12091000129	12091000129	1
12091000129	12091000129	12091000129	1
12091000129	12091000129	12091000129	1
12091000129	12091000129	12091000129	1
12099000009	12099000009	12099000009	5
12099000009	12099000009	12099000009	5
12099000009	12099000009	12099000009	5
12099000009	12099000009	12099000009	5
12099000009	12099000009	12099000009	5
12099000009	12099000009	12099000009	4
12099000009	12099000009	12099000009	2
12099000009	12099000009	12099000009	2
12099000009	12099000009	12099000009	1
12099000009	12099000009	12099000009	1
12099000009	12099000009	12099000009	1
12099000011	12099000011	12099000011	14
12099000011	12099000011	12099000011	10
12099000011	12099000011	12099000011	7
12099000011	12099000011	12099000011	4
12099000011	12099000011	12099000011	4
12099000011	12099000011	12099000011	3
12099000011	12099000011	12099000011	2
12099000011	12099000011	12099000011	2
12099000011	12099000011	12099000011	2
12099000011	12099000011	12099000011	2
12099000011	12099000011	12099000011	2
12099000011	12099000011	12099000011	2
12099000011	12099000011	12099000011	1
12099000011	12099000011	12099000011	1
12099000019	12099000019	12099000019	16
12099000019	12099000019	12099000019	13
12099000019	12099000019	12099000019	8
12099000019	12099000019	12099000019	4
12099000019	12099000019	12099000019	4
12099000019	12099000019	12099000019	2
12099000019	12099000019	12099000019	2
12099000019	12099000019	12099000019	2
12099000019	12099000019	12099000019	1
12099000019	12099000019	12099000019	1
12099000019	12099000019	12099000019	1
12099000019	12099000019	12099000019	1
12099000033	12099000033	12099000033	11
12099000033	12099000033	12099000033	7
12099000033	12099000033	12099000033	6
12099000033	12099000033	12099000033	5
12099000033	12099000033	12099000033	4
12099000033	12099000033	12099000033	2
12099000033	12099000033	12099000033	1
12099000033	12099000033	12099000033	1
12099000033	12099000033	12099000033	1
12099000033	12099000033	12099000033	1
12099000036	12099000036	12099000036	5
12099000036	12099000036	12099000036	4
12099000036	12099000036	12099000036	4
12099000036	12099000036	12099000036	3
12099000036	12099000036	12099000036	3
12099000036	12099000036	12099000036	3
12099000036	12099000036	12099000036	2
12099000036	12099000036	12099000036	2
12099000036	12099000036	12099000036	2
12099000036	12099000036	12099000036	1
12099000036	12099000036	12099000036	1
12099000036	12099000036	12099000036	1
12099000036	12099000036	12099000036	1
12099000036	12099000036	12099000036	1
12099000036	12099000036	12099000036	1
12099000048	12099000048	12099000048	7
12099000048	12099000048	12099000048	6
12099000048	12099000048	12099000048	4
12099000048	12099000048	12099000048	3
12099000048	12099000048	12099000048	2
12099000048	12099000048	12099000048	2
12099000048	12099000048	12099000048	2
12099000048	12099000048	12099000048	1
12099000048	12099000048	12099000048	1
12099000048	12099000048	12099000048	1
12099000048	12099000048	12099000048	1
12099000048	12099000048	12099000048	1
12099000048	12099000048	12099000048	1
12099000048	12099000048	12099000048	1
12099000048	12099000048	12099000048	1
12099000053	12099000053	12099000053	8
12099000053	12099000053	12099000053	4
12099000053	12099000053	12099000053	3
12099000053	12099000053	12099000053	2
12099000053	12099000053	12099000053	1
12099000053	12099000053	12099000053	1
12099000053	12099000053	12099000053	1
12099000053	12099000053	12099000053	1
12099000053	12099000053	12099000053	1
12099000053	12099000053	12099000053	1
12099000053	12099000053	12099000053	1
12099000055	12099000055	12099000055	6
12099000055	12099000055	12099000055	4
12099000055	12099000055	12099000055	3
12099000055	12099000055	12099000055	2
12099000055	12099000055	12099000055	2
12099000055	12099000055	12099000055	2
12099000055	12099000055	12099000055	1
12099000055	12099000055	12099000055	1
12099000055	12099000055	12099000055	1
12099000055	12099000055	12099000055	1
12099000055	12099000055	12099000055	1
12099000062	12099000062	12099000062	13
12099000062	12099000062	12099000062	11
12099000062	12099000062	12099000062	10
12099000062	12099000062	12099000062	4
12099000062	12099000062	12099000062	3
12099000062	12099000062	12099000062	2
12099000062	12099000062	12099000062	1
12099000062	12099000062	12099000062	1
12099000062	12099000062	12099000062	1
12099000062	12099000062	12099000062	1
12099000062	12099000062	12099000062	1
12099000062	12099000062	12099000062	1
12099000064	12099000064	12099000064	7
12099000064	12099000064	12099000064	5
12099000064	12099000064	12099000064	4
12099000064	12099000064	12099000064	3
12099000064	12099000064	12099000064	2
12099000064	12099000064	12099000064	2
12099000064	12099000064	12099000064	2
12099000064	12099000064	12099000064	2
12099000064	12099000064	12099000064	2
12099000064	12099000064	12099000064	2
12099000064	12099000064	12099000064	1
12099000064	12099000064	12099000064	1
12099000064	12099000064	12099000064	1
12099000067	12099000067	12099000067	14
12099000067	12099000067	12099000067	5
12099000067	12099000067	12099000067	4
12099000067	12099000067	12099000067	3
12099000067	12099000067	12099000067	2
12099000067	12099000067	12099000067	2
12099000067	12099000067	12099000067	1
12099000067	12099000067	12099000067	1
12099000067	12099000067	12099000067	1
12099000067	12099000067	12099000067	1
12099000067	12099000067	12099000067	1
12099000074	12099000074	12099000074	8
12099000074	12099000074	12099000074	8
12099000074	12099000074	12099000074	8
12099000074	12099000074	12099000074	4
12099000074	12099000074	12099000074	3
12099000074	12099000074	12099000074	3
12099000074	12099000074	12099000074	2
12099000074	12099000074	12099000074	2
12099000074	12099000074	12099000074	1
12099000074	12099000074	12099000074	1
12099000074	12099000074	12099000074	1
12099000078	12099000078	12099000078	17
12099000078	12099000078	12099000078	8
12099000078	12099000078	12099000078	8
12099000078	12099000078	12099000078	4
12099000078	12099000078	12099000078	4
12099000078	12099000078	12099000078	3
12099000078	12099000078	12099000078	3
12099000078	12099000078	12099000078	1
12099000078	12099000078	12099000078	1
12099000078	12099000078	12099000078	1
12099000081	12099000081	12099000081	10
12099000081	12099000081	12099000081	5
12099000081	12099000081	12099000081	4
12099000081	12099000081	12099000081	3
12099000081	12099000081	12099000081	2
12099000081	12099000081	12099000081	2
12099000081	12099000081	12099000081	1
12099000081	12099000081	12099000081	1
12099000081	12099000081	12099000081	1
12099000081	12099000081	12099000081	1
12099000097	12099000097	12099000097	9
12099000097	12099000097	12099000097	4
12099000097	12099000097	12099000097	4
12099000097	12099000097	12099000097	3
12099000097	12099000097	12099000097	2
12099000097	12099000097	12099000097	2
12099000097	12099000097	12099000097	2
12099000097	12099000097	12099000097	2
12099000097	12099000097	12099000097	2
12099000097	12099000097	12099000097	2
12099000097	12099000097	12099000097	1
12099000097	12099000097	12099000097	1
12099000097	12099000097	12099000097	1
12099000100	12099000100	12099000100	7
12099000100	12099000100	12099000100	6
12099000100	12099000100	12099000100	5
12099000100	12099000100	12099000100	4
12099000100	12099000100	12099000100	4
12099000100	12099000100	12099000100	4
12099000100	12099000100	12099000100	2
12099000100	12099000100	12099000100	2
12099000100	12099000100	12099000100	2
12099000100	12099000100	12099000100	2
12099000100	12099000100	12099000100	2
12099000100	12099000100	12099000100	2
12099000100	12099000100	12099000100	2
12099000100	12099000100	12099000100	1
12099000100	12099000100	12099000100	1
12099000104	12099000104	12099000104	7
12099000104	12099000104	12099000104	6
12099000104	12099000104	12099000104	4
12099000104	12099000104	12099000104	4
12099000104	12099000104	12099000104	4
12099000104	12099000104	12099000104	4
12099000104	12099000104	12099000104	2
12099000104	12099000104	12099000104	2
12099000104	12099000104	12099000104	1
12099000104	12099000104	12099000104	1
12099000104	12099000104	12099000104	1
12099000104	12099000104	12099000104	1
12099000105	12099000105	12099000105	6
12099000105	12099000105	12099000105	5
12099000105	12099000105	12099000105	2
12099000105	12099000105	12099000105	1
12099000105	12099000105	12099000105	1
12099000105	12099000105	12099000105	1
12099000105	12099000105	12099000105	1
12099000105	12099000105	12099000105	1
12099000105	12099000105	12099000105	1
12099000105	12099000105	12099000105	1
12099000107	12099000107	12099000107	8
12099000107	12099000107	12099000107	8
12099000107	12099000107	12099000107	4
12099000107	12099000107	12099000107	4
12099000107	12099000107	12099000107	4
12099000107	12099000107	12099000107	4
12099000107	12099000107	12099000107	4
12099000107	12099000107	12099000107	3
12099000107	12099000107	12099000107	3
12099000107	12099000107	12099000107	2
12099000107	12099000107	12099000107	2
12099000107	12099000107	12099000107	1
12099000107	12099000107	12099000107	1
12099000107	12099000107	12099000107	1
12099000119	12099000119	12099000119	16
12099000119	12099000119	12099000119	10
12099000119	12099000119	12099000119	9
12099000119	12099000119	12099000119	7
12099000119	12099000119	12099000119	5
12099000119	12099000119	12099000119	4
12099000119	12099000119	12099000119	3
12099000119	12099000119	12099000119	3
12099000119	12099000119	12099000119	3
12099000119	12099000119	12099000119	1
12099000119	12099000119	12099000119	1
12099000119	12099000119	12099000119	1
12099000119	12099000119	12099000119	1
12099000121	12099000121	12099000121	10
12099000121	12099000121	12099000121	7
12099000121	12099000121	12099000121	5
12099000121	12099000121	12099000121	5
12099000121	12099000121	12099000121	4
12099000121	12099000121	12099000121	4
12099000121	12099000121	12099000121	3
12099000121	12099000121	12099000121	3
12099000121	12099000121	12099000121	2
12099000121	12099000121	12099000121	2
12099000121	12099000121	12099000121	2
12099000121	12099000121	12099000121	2
12099000121	12099000121	12099000121	2
12099000121	12099000121	12099000121	1
12099000121	12099000121	12099000121	1
12099000121	12099000121	12099000121	1
12099000126	12099000126	12099000126	7
12099000126	12099000126	12099000126	6
12099000126	12099000126	12099000126	6
12099000126	12099000126	12099000126	4
12099000126	12099000126	12099000126	4
12099000126	12099000126	12099000126	3
12099000126	12099000126	12099000126	2
12099000126	12099000126	12099000126	2
12099000126	12099000126	12099000126	2
12099000126	12099000126	12099000126	2
12099000126	12099000126	12099000126	1
12099000130	12099000130	12099000130	7
12099000130	12099000130	12099000130	6
12099000130	12099000130	12099000130	4
12099000130	12099000130	12099000130	3
12099000130	12099000130	12099000130	3
12099000130	12099000130	12099000130	3
12099000130	12099000130	12099000130	3
12099000130	12099000130	12099000130	1
12099000130	12099000130	12099000130	1
12099000130	12099000130	12099000130	1
12099000130	12099000130	12099000130	1
12099000130	12099000130	12099000130	1
12099000130	12099000130	12099000130	1
12099000131	12099000131	12099000131	12
12099000131	12099000131	12099000131	9
12099000131	12099000131	12099000131	8
12099000131	12099000131	12099000131	5
12099000131	12099000131	12099000131	4
12099000131	12099000131	12099000131	4
12099000131	12099000131	12099000131	3
12099000131	12099000131	12099000131	2
12099000131	12099000131	12099000131	2
12099000131	12099000131	12099000131	2
12099000131	12099000131	12099000131	2
12099000131	12099000131	12099000131	2
12099000131	12099000131	12099000131	1
12099000131	12099000131	12099000131	1
12099000133	12099000133	12099000133	7
12099000133	12099000133	12099000133	7
12099000133	12099000133	12099000133	6
12099000133	12099000133	12099000133	5
12099000133	12099000133	12099000133	5
12099000133	12099000133	12099000133	4
12099000133	12099000133	12099000133	2
12099000133	12099000133	12099000133	2
12099000133	12099000133	12099000133	2
12099000133	12099000133	12099000133	2
12099000133	12099000133	12099000133	1
12099000133	12099000133	12099000133	1
12099000133	12099000133	12099000133	1
12099000133	12099000133	12099000133	1
12099000133	12099000133	12099000133	1
12099000133	12099000133	12099000133	1
12099000133	12099000133	12099000133	1
12099000133	12099000133	12099000133	1
12099000133	12099000133	12099000133	1
121007000018	121007000018	121007000018	10
121007000018	121007000018	121007000018	5
121007000018	121007000018	121007000018	3
121007000018	121007000018	121007000018	2
121007000018	121007000018	121007000018	2
121007000018	121007000018	121007000018	1
121007000018	121007000018	121007000018	1
121007000018	121007000018	121007000018	1
121007000018	121007000018	121007000018	1
121007000018	121007000018	121007000018	1
121007000018	121007000018	121007000018	1
121007000018	121007000018	121007000018	1
121019000015	121019000015	121019000015	9
121019000015	121019000015	121019000015	6
121019000015	121019000015	121019000015	3
121019000015	121019000015	121019000015	2
121019000015	121019000015	121019000015	2
[truncated: 116,226 more rows]
