# Supplementary material for: A general pattern of the species abundance distribution
Source: PeerJ. 2018 Nov 13;6:e5928. doi: 10.7717/peerj.5928 (PMC6238767; doi:10.7717/peerj.5928)
Supplement: Supplemental Information 8 — A dataset (named “bbs”) used to obtain the frequency of SADs. The detail information can be found in appendixes of Baldridge et al. (2016a) and Baldridge et al. (2016b). [file peerj-06-5928-s008.xlsx]

## Sheet: bbs_obs
Sample ID	Station ID	BioDataTaxonName	Abundance
11001	11001	11001	87
11001	11001	11001	29
11001	11001	11001	27
11001	11001	11001	25
11001	11001	11001	25
11001	11001	11001	20
11001	11001	11001	20
11001	11001	11001	19
11001	11001	11001	18
11001	11001	11001	17
11001	11001	11001	17
11001	11001	11001	12
11001	11001	11001	12
11001	11001	11001	11
11001	11001	11001	10
11001	11001	11001	8
11001	11001	11001	8
11001	11001	11001	7
11001	11001	11001	7
11001	11001	11001	7
11001	11001	11001	6
11001	11001	11001	5
11001	11001	11001	5
11001	11001	11001	4
11001	11001	11001	3
11001	11001	11001	3
11001	11001	11001	3
11001	11001	11001	2
11001	11001	11001	2
11001	11001	11001	2
11001	11001	11001	2
11001	11001	11001	2
11001	11001	11001	2
11001	11001	11001	1
11001	11001	11001	1
11001	11001	11001	1
11001	11001	11001	1
11001	11001	11001	1
11001	11001	11001	1
11001	11001	11001	1
11001	11001	11001	1
11001	11001	11001	1
11003	11003	11003	119
11003	11003	11003	50
11003	11003	11003	31
11003	11003	11003	31
11003	11003	11003	27
11003	11003	11003	23
11003	11003	11003	21
11003	11003	11003	20
11003	11003	11003	19
11003	11003	11003	19
11003	11003	11003	15
11003	11003	11003	10
11003	11003	11003	8
11003	11003	11003	7
11003	11003	11003	6
11003	11003	11003	5
11003	11003	11003	4
11003	11003	11003	4
11003	11003	11003	4
11003	11003	11003	3
11003	11003	11003	3
11003	11003	11003	2
11003	11003	11003	2
11003	11003	11003	2
11003	11003	11003	2
11003	11003	11003	2
11003	11003	11003	1
11003	11003	11003	1
11003	11003	11003	1
11003	11003	11003	1
11003	11003	11003	1
11003	11003	11003	1
11003	11003	11003	1
11003	11003	11003	1
11003	11003	11003	1
11003	11003	11003	1
11003	11003	11003	1
11003	11003	11003	1
11003	11003	11003	1
11003	11003	11003	1
11005	11005	11005	37
11005	11005	11005	20
11005	11005	11005	17
11005	11005	11005	17
11005	11005	11005	16
11005	11005	11005	15
11005	11005	11005	12
11005	11005	11005	8
11005	11005	11005	8
11005	11005	11005	8
11005	11005	11005	8
11005	11005	11005	8
11005	11005	11005	7
11005	11005	11005	7
11005	11005	11005	7
11005	11005	11005	6
11005	11005	11005	5
11005	11005	11005	5
11005	11005	11005	4
11005	11005	11005	4
11005	11005	11005	3
11005	11005	11005	3
11005	11005	11005	3
11005	11005	11005	3
11005	11005	11005	2
11005	11005	11005	2
11005	11005	11005	1
11005	11005	11005	1
11005	11005	11005	1
11005	11005	11005	1
11005	11005	11005	1
11005	11005	11005	1
11005	11005	11005	1
11005	11005	11005	1
11005	11005	11005	1
11005	11005	11005	1
11005	11005	11005	1
11006	11006	11006	102
11006	11006	11006	50
11006	11006	11006	33
11006	11006	11006	32
11006	11006	11006	28
11006	11006	11006	28
11006	11006	11006	26
11006	11006	11006	23
11006	11006	11006	23
11006	11006	11006	22
11006	11006	11006	20
11006	11006	11006	19
11006	11006	11006	18
11006	11006	11006	18
11006	11006	11006	18
11006	11006	11006	17
11006	11006	11006	14
11006	11006	11006	14
11006	11006	11006	12
11006	11006	11006	12
11006	11006	11006	12
11006	11006	11006	12
11006	11006	11006	11
11006	11006	11006	10
11006	11006	11006	10
11006	11006	11006	9
11006	11006	11006	9
11006	11006	11006	9
11006	11006	11006	8
11006	11006	11006	8
11006	11006	11006	7
11006	11006	11006	7
11006	11006	11006	6
11006	11006	11006	6
11006	11006	11006	4
11006	11006	11006	4
11006	11006	11006	3
11006	11006	11006	3
11006	11006	11006	3
11006	11006	11006	3
11006	11006	11006	3
11006	11006	11006	2
11006	11006	11006	2
11006	11006	11006	2
11006	11006	11006	2
11006	11006	11006	2
11006	11006	11006	1
11006	11006	11006	1
11006	11006	11006	1
11006	11006	11006	1
11006	11006	11006	1
11006	11006	11006	1
11007	11007	11007	33
11007	11007	11007	33
11007	11007	11007	30
11007	11007	11007	28
11007	11007	11007	25
11007	11007	11007	23
11007	11007	11007	20
11007	11007	11007	19
11007	11007	11007	17
11007	11007	11007	16
11007	11007	11007	15
11007	11007	11007	13
11007	11007	11007	10
11007	11007	11007	9
11007	11007	11007	8
11007	11007	11007	8
11007	11007	11007	8
11007	11007	11007	8
11007	11007	11007	8
11007	11007	11007	7
11007	11007	11007	7
11007	11007	11007	6
11007	11007	11007	6
11007	11007	11007	6
11007	11007	11007	5
11007	11007	11007	5
11007	11007	11007	4
11007	11007	11007	4
11007	11007	11007	3
11007	11007	11007	3
11007	11007	11007	3
11007	11007	11007	3
11007	11007	11007	3
11007	11007	11007	3
11007	11007	11007	3
11007	11007	11007	3
11007	11007	11007	2
11007	11007	11007	2
11007	11007	11007	2
11007	11007	11007	2
11007	11007	11007	1
11007	11007	11007	1
11007	11007	11007	1
11007	11007	11007	1
11007	11007	11007	1
11007	11007	11007	1
11007	11007	11007	1
11007	11007	11007	1
11007	11007	11007	1
11007	11007	11007	1
11007	11007	11007	1
11007	11007	11007	1
11007	11007	11007	1
11007	11007	11007	1
11007	11007	11007	1
11007	11007	11007	1
11007	11007	11007	1
11009	11009	11009	50
11009	11009	11009	42
11009	11009	11009	38
11009	11009	11009	24
11009	11009	11009	22
11009	11009	11009	21
11009	11009	11009	17
11009	11009	11009	13
11009	11009	11009	9
11009	11009	11009	6
11009	11009	11009	6
11009	11009	11009	6
11009	11009	11009	6
11009	11009	11009	5
11009	11009	11009	5
11009	11009	11009	4
11009	11009	11009	4
11009	11009	11009	4
11009	11009	11009	4
11009	11009	11009	4
11009	11009	11009	3
11009	11009	11009	3
11009	11009	11009	3
11009	11009	11009	3
11009	11009	11009	2
11009	11009	11009	2
11009	11009	11009	2
11009	11009	11009	2
11009	11009	11009	2
11009	11009	11009	2
11009	11009	11009	1
11009	11009	11009	1
11009	11009	11009	1
11009	11009	11009	1
11009	11009	11009	1
11009	11009	11009	1
11009	11009	11009	1
11009	11009	11009	1
11009	11009	11009	1
11009	11009	11009	1
11010	11010	11010	130
11010	11010	11010	57
11010	11010	11010	52
11010	11010	11010	38
11010	11010	11010	21
11010	11010	11010	20
11010	11010	11010	18
11010	11010	11010	14
11010	11010	11010	13
11010	11010	11010	12
11010	11010	11010	11
11010	11010	11010	10
11010	11010	11010	10
11010	11010	11010	8
11010	11010	11010	7
11010	11010	11010	6
11010	11010	11010	6
11010	11010	11010	6
11010	11010	11010	5
11010	11010	11010	5
11010	11010	11010	4
11010	11010	11010	4
11010	11010	11010	4
11010	11010	11010	3
11010	11010	11010	3
11010	11010	11010	3
11010	11010	11010	3
11010	11010	11010	3
11010	11010	11010	3
11010	11010	11010	3
11010	11010	11010	2
11010	11010	11010	2
11010	11010	11010	2
11010	11010	11010	2
11010	11010	11010	2
11010	11010	11010	1
11010	11010	11010	1
11010	11010	11010	1
11010	11010	11010	1
11010	11010	11010	1
11010	11010	11010	1
11010	11010	11010	1
11010	11010	11010	1
11010	11010	11010	1
11010	11010	11010	1
11010	11010	11010	1
11010	11010	11010	1
11020	11020	11020	94
11020	11020	11020	52
11020	11020	11020	46
11020	11020	11020	40
11020	11020	11020	27
11020	11020	11020	26
11020	11020	11020	21
11020	11020	11020	14
11020	11020	11020	10
11020	11020	11020	8
11020	11020	11020	8
11020	11020	11020	7
11020	11020	11020	7
11020	11020	11020	6
11020	11020	11020	6
11020	11020	11020	6
11020	11020	11020	5
11020	11020	11020	4
11020	11020	11020	4
11020	11020	11020	4
11020	11020	11020	4
11020	11020	11020	4
11020	11020	11020	4
11020	11020	11020	3
11020	11020	11020	3
11020	11020	11020	3
11020	11020	11020	3
11020	11020	11020	3
11020	11020	11020	3
11020	11020	11020	3
11020	11020	11020	2
11020	11020	11020	2
11020	11020	11020	2
11020	11020	11020	2
11020	11020	11020	2
11020	11020	11020	2
11020	11020	11020	2
11020	11020	11020	2
11020	11020	11020	2
11020	11020	11020	1
11020	11020	11020	1
11020	11020	11020	1
11020	11020	11020	1
11020	11020	11020	1
11020	11020	11020	1
11022	11022	11022	47
11022	11022	11022	31
11022	11022	11022	22
11022	11022	11022	19
11022	11022	11022	19
11022	11022	11022	17
11022	11022	11022	17
11022	11022	11022	15
11022	11022	11022	14
11022	11022	11022	13
11022	11022	11022	13
11022	11022	11022	12
11022	11022	11022	12
11022	11022	11022	11
11022	11022	11022	11
11022	11022	11022	11
11022	11022	11022	10
11022	11022	11022	9
11022	11022	11022	8
11022	11022	11022	8
11022	11022	11022	7
11022	11022	11022	7
11022	11022	11022	6
11022	11022	11022	6
11022	11022	11022	5
11022	11022	11022	5
11022	11022	11022	5
11022	11022	11022	5
11022	11022	11022	4
11022	11022	11022	4
11022	11022	11022	4
11022	11022	11022	4
11022	11022	11022	3
11022	11022	11022	3
11022	11022	11022	3
11022	11022	11022	3
11022	11022	11022	3
11022	11022	11022	3
11022	11022	11022	3
11022	11022	11022	3
11022	11022	11022	3
11022	11022	11022	3
11022	11022	11022	2
11022	11022	11022	2
11022	11022	11022	2
11022	11022	11022	2
11022	11022	11022	2
11022	11022	11022	2
11022	11022	11022	2
11022	11022	11022	2
11022	11022	11022	2
11022	11022	11022	2
11022	11022	11022	2
11022	11022	11022	1
11022	11022	11022	1
11022	11022	11022	1
11022	11022	11022	1
11022	11022	11022	1
11022	11022	11022	1
11022	11022	11022	1
11022	11022	11022	1
11022	11022	11022	1
11022	11022	11022	1
11022	11022	11022	1
11033	11033	11033	37
11033	11033	11033	20
11033	11033	11033	20
11033	11033	11033	17
11033	11033	11033	16
11033	11033	11033	15
11033	11033	11033	14
11033	11033	11033	14
11033	11033	11033	11
11033	11033	11033	10
11033	11033	11033	6
11033	11033	11033	4
11033	11033	11033	4
11033	11033	11033	4
11033	11033	11033	4
11033	11033	11033	4
11033	11033	11033	4
11033	11033	11033	3
11033	11033	11033	3
11033	11033	11033	3
11033	11033	11033	2
11033	11033	11033	2
11033	11033	11033	2
11033	11033	11033	1
11033	11033	11033	1
11033	11033	11033	1
11033	11033	11033	1
11033	11033	11033	1
11033	11033	11033	1
11033	11033	11033	1
11033	11033	11033	1
11033	11033	11033	1
11033	11033	11033	1
11033	11033	11033	1
11033	11033	11033	1
11034	11034	11034	56
11034	11034	11034	39
11034	11034	11034	37
11034	11034	11034	36
11034	11034	11034	32
11034	11034	11034	32
11034	11034	11034	22
11034	11034	11034	22
11034	11034	11034	18
11034	11034	11034	18
11034	11034	11034	15
11034	11034	11034	14
11034	11034	11034	10
11034	11034	11034	10
11034	11034	11034	9
11034	11034	11034	9
11034	11034	11034	9
11034	11034	11034	9
11034	11034	11034	9
11034	11034	11034	8
11034	11034	11034	6
11034	11034	11034	5
11034	11034	11034	5
11034	11034	11034	5
11034	11034	11034	5
11034	11034	11034	5
11034	11034	11034	4
11034	11034	11034	4
11034	11034	11034	4
11034	11034	11034	3
11034	11034	11034	3
11034	11034	11034	3
11034	11034	11034	2
11034	11034	11034	2
11034	11034	11034	1
11034	11034	11034	1
11034	11034	11034	1
11034	11034	11034	1
11034	11034	11034	1
11034	11034	11034	1
11034	11034	11034	1
11034	11034	11034	1
11034	11034	11034	1
11034	11034	11034	1
11045	11045	11045	58
11045	11045	11045	52
11045	11045	11045	33
11045	11045	11045	31
11045	11045	11045	24
11045	11045	11045	18
11045	11045	11045	18
11045	11045	11045	17
11045	11045	11045	15
11045	11045	11045	13
11045	11045	11045	11
11045	11045	11045	9
11045	11045	11045	9
11045	11045	11045	9
11045	11045	11045	9
11045	11045	11045	8
11045	11045	11045	8
11045	11045	11045	7
11045	11045	11045	7
11045	11045	11045	6
11045	11045	11045	6
11045	11045	11045	6
11045	11045	11045	6
11045	11045	11045	5
11045	11045	11045	5
11045	11045	11045	5
11045	11045	11045	5
11045	11045	11045	5
11045	11045	11045	4
11045	11045	11045	4
11045	11045	11045	4
11045	11045	11045	4
11045	11045	11045	4
11045	11045	11045	4
11045	11045	11045	4
11045	11045	11045	3
11045	11045	11045	3
11045	11045	11045	3
11045	11045	11045	3
11045	11045	11045	2
11045	11045	11045	2
11045	11045	11045	2
11045	11045	11045	2
11045	11045	11045	2
11045	11045	11045	2
11045	11045	11045	2
11045	11045	11045	2
11045	11045	11045	2
11045	11045	11045	1
11045	11045	11045	1
11045	11045	11045	1
11045	11045	11045	1
11045	11045	11045	1
11045	11045	11045	1
11045	11045	11045	1
11045	11045	11045	1
11045	11045	11045	1
11045	11045	11045	1
11045	11045	11045	1
11045	11045	11045	1
11045	11045	11045	1
11053	11053	11053	63
11053	11053	11053	54
11053	11053	11053	36
11053	11053	11053	23
11053	11053	11053	23
11053	11053	11053	22
11053	11053	11053	19
11053	11053	11053	19
11053	11053	11053	18
11053	11053	11053	17
11053	11053	11053	17
11053	11053	11053	16
11053	11053	11053	16
11053	11053	11053	15
11053	11053	11053	14
11053	11053	11053	11
11053	11053	11053	9
11053	11053	11053	8
11053	11053	11053	7
11053	11053	11053	7
11053	11053	11053	6
11053	11053	11053	4
11053	11053	11053	4
11053	11053	11053	4
11053	11053	11053	4
11053	11053	11053	4
11053	11053	11053	4
11053	11053	11053	4
11053	11053	11053	3
11053	11053	11053	3
11053	11053	11053	3
11053	11053	11053	2
11053	11053	11053	2
11053	11053	11053	2
11053	11053	11053	2
11053	11053	11053	2
11053	11053	11053	2
11053	11053	11053	1
11053	11053	11053	1
11053	11053	11053	1
11053	11053	11053	1
11053	11053	11053	1
11053	11053	11053	1
11053	11053	11053	1
11057	11057	11057	40
11057	11057	11057	38
11057	11057	11057	38
11057	11057	11057	35
11057	11057	11057	35
11057	11057	11057	32
11057	11057	11057	24
11057	11057	11057	23
11057	11057	11057	20
11057	11057	11057	19
11057	11057	11057	17
11057	11057	11057	17
11057	11057	11057	16
11057	11057	11057	15
11057	11057	11057	15
11057	11057	11057	13
11057	11057	11057	12
11057	11057	11057	12
11057	11057	11057	12
11057	11057	11057	12
11057	11057	11057	10
11057	11057	11057	10
11057	11057	11057	9
11057	11057	11057	8
11057	11057	11057	8
11057	11057	11057	7
11057	11057	11057	7
11057	11057	11057	7
11057	11057	11057	6
11057	11057	11057	6
11057	11057	11057	5
11057	11057	11057	5
11057	11057	11057	5
11057	11057	11057	4
11057	11057	11057	4
11057	11057	11057	3
11057	11057	11057	3
11057	11057	11057	3
11057	11057	11057	2
11057	11057	11057	2
11057	11057	11057	2
11057	11057	11057	1
11057	11057	11057	1
11057	11057	11057	1
11057	11057	11057	1
11057	11057	11057	1
11057	11057	11057	1
11057	11057	11057	1
11058	11058	11058	73
11058	11058	11058	52
11058	11058	11058	43
11058	11058	11058	33
11058	11058	11058	26
11058	11058	11058	26
11058	11058	11058	20
11058	11058	11058	20
11058	11058	11058	18
11058	11058	11058	17
11058	11058	11058	15
11058	11058	11058	15
11058	11058	11058	13
11058	11058	11058	10
11058	11058	11058	9
11058	11058	11058	9
11058	11058	11058	8
11058	11058	11058	7
11058	11058	11058	5
11058	11058	11058	5
11058	11058	11058	5
11058	11058	11058	5
11058	11058	11058	4
11058	11058	11058	4
11058	11058	11058	4
11058	11058	11058	4
11058	11058	11058	4
11058	11058	11058	3
11058	11058	11058	2
11058	11058	11058	2
11058	11058	11058	2
11058	11058	11058	2
11058	11058	11058	1
11058	11058	11058	1
11058	11058	11058	1
11058	11058	11058	1
11065	11065	11065	60
11065	11065	11065	58
11065	11065	11065	50
11065	11065	11065	37
11065	11065	11065	25
11065	11065	11065	24
11065	11065	11065	24
11065	11065	11065	23
11065	11065	11065	18
11065	11065	11065	18
11065	11065	11065	17
11065	11065	11065	17
11065	11065	11065	16
11065	11065	11065	15
11065	11065	11065	14
11065	11065	11065	14
11065	11065	11065	13
11065	11065	11065	13
11065	11065	11065	12
11065	11065	11065	10
11065	11065	11065	8
11065	11065	11065	8
11065	11065	11065	7
11065	11065	11065	6
11065	11065	11065	6
11065	11065	11065	6
11065	11065	11065	5
11065	11065	11065	5
11065	11065	11065	5
11065	11065	11065	5
11065	11065	11065	4
11065	11065	11065	3
11065	11065	11065	3
11065	11065	11065	3
11065	11065	11065	2
11065	11065	11065	2
11065	11065	11065	2
11065	11065	11065	1
11065	11065	11065	1
11065	11065	11065	1
11065	11065	11065	1
11065	11065	11065	1
11065	11065	11065	1
11065	11065	11065	1
11065	11065	11065	1
11065	11065	11065	1
11065	11065	11065	1
11067	11067	11067	50
11067	11067	11067	43
11067	11067	11067	37
11067	11067	11067	34
11067	11067	11067	32
11067	11067	11067	31
11067	11067	11067	30
11067	11067	11067	27
11067	11067	11067	18
11067	11067	11067	18
11067	11067	11067	15
11067	11067	11067	15
11067	11067	11067	11
11067	11067	11067	11
11067	11067	11067	10
11067	11067	11067	9
11067	11067	11067	9
11067	11067	11067	8
11067	11067	11067	8
11067	11067	11067	8
11067	11067	11067	7
11067	11067	11067	7
11067	11067	11067	7
11067	11067	11067	7
11067	11067	11067	6
11067	11067	11067	6
11067	11067	11067	6
11067	11067	11067	6
11067	11067	11067	6
11067	11067	11067	5
11067	11067	11067	5
11067	11067	11067	5
11067	11067	11067	5
11067	11067	11067	4
11067	11067	11067	3
11067	11067	11067	3
11067	11067	11067	3
11067	11067	11067	3
11067	11067	11067	3
11067	11067	11067	2
11067	11067	11067	2
11067	11067	11067	2
11067	11067	11067	2
11067	11067	11067	2
11067	11067	11067	1
11067	11067	11067	1
11067	11067	11067	1
11067	11067	11067	1
11067	11067	11067	1
11067	11067	11067	1
11067	11067	11067	1
11068	11068	11068	63
11068	11068	11068	53
11068	11068	11068	45
11068	11068	11068	26
11068	11068	11068	24
11068	11068	11068	21
11068	11068	11068	21
11068	11068	11068	18
11068	11068	11068	17
11068	11068	11068	17
11068	11068	11068	17
11068	11068	11068	15
11068	11068	11068	14
11068	11068	11068	14
11068	11068	11068	13
11068	11068	11068	12
11068	11068	11068	11
11068	11068	11068	11
11068	11068	11068	8
11068	11068	11068	8
11068	11068	11068	8
11068	11068	11068	8
11068	11068	11068	8
11068	11068	11068	8
11068	11068	11068	7
11068	11068	11068	7
11068	11068	11068	6
11068	11068	11068	3
11068	11068	11068	3
11068	11068	11068	3
11068	11068	11068	2
11068	11068	11068	1
11068	11068	11068	1
11068	11068	11068	1
11068	11068	11068	1
11069	11069	11069	81
11069	11069	11069	69
11069	11069	11069	67
11069	11069	11069	36
11069	11069	11069	30
11069	11069	11069	28
11069	11069	11069	27
11069	11069	11069	26
11069	11069	11069	25
11069	11069	11069	16
11069	11069	11069	15
11069	11069	11069	13
11069	11069	11069	13
11069	11069	11069	11
11069	11069	11069	11
11069	11069	11069	10
11069	11069	11069	9
11069	11069	11069	9
11069	11069	11069	7
11069	11069	11069	7
11069	11069	11069	6
11069	11069	11069	6
11069	11069	11069	5
11069	11069	11069	5
11069	11069	11069	5
11069	11069	11069	5
11069	11069	11069	5
11069	11069	11069	4
11069	11069	11069	4
11069	11069	11069	4
11069	11069	11069	4
11069	11069	11069	3
11069	11069	11069	3
11069	11069	11069	3
11069	11069	11069	3
11069	11069	11069	3
11069	11069	11069	3
11069	11069	11069	2
11069	11069	11069	2
11069	11069	11069	2
11069	11069	11069	2
11069	11069	11069	1
11069	11069	11069	1
11069	11069	11069	1
11069	11069	11069	1
11071	11071	11071	49
11071	11071	11071	42
11071	11071	11071	29
11071	11071	11071	23
11071	11071	11071	21
11071	11071	11071	21
11071	11071	11071	15
11071	11071	11071	13
11071	11071	11071	13
11071	11071	11071	11
11071	11071	11071	11
11071	11071	11071	11
11071	11071	11071	10
11071	11071	11071	10
11071	11071	11071	9
11071	11071	11071	7
11071	11071	11071	7
11071	11071	11071	6
11071	11071	11071	5
11071	11071	11071	5
11071	11071	11071	5
11071	11071	11071	4
11071	11071	11071	4
11071	11071	11071	3
11071	11071	11071	2
11071	11071	11071	2
11071	11071	11071	2
11071	11071	11071	1
11071	11071	11071	1
11071	11071	11071	1
11071	11071	11071	1
11071	11071	11071	1
11071	11071	11071	1
11071	11071	11071	1
11072	11072	11072	68
11072	11072	11072	50
11072	11072	11072	33
11072	11072	11072	28
11072	11072	11072	22
11072	11072	11072	21
11072	11072	11072	16
11072	11072	11072	13
11072	11072	11072	13
11072	11072	11072	12
11072	11072	11072	9
11072	11072	11072	9
11072	11072	11072	8
11072	11072	11072	8
11072	11072	11072	5
11072	11072	11072	5
11072	11072	11072	5
11072	11072	11072	4
11072	11072	11072	4
11072	11072	11072	3
11072	11072	11072	2
11072	11072	11072	2
11072	11072	11072	1
11072	11072	11072	1
11072	11072	11072	1
11072	11072	11072	1
11072	11072	11072	1
11072	11072	11072	1
11072	11072	11072	1
11074	11074	11074	38
11074	11074	11074	37
11074	11074	11074	35
11074	11074	11074	34
11074	11074	11074	32
11074	11074	11074	32
11074	11074	11074	31
11074	11074	11074	24
11074	11074	11074	23
11074	11074	11074	23
11074	11074	11074	23
11074	11074	11074	18
11074	11074	11074	18
11074	11074	11074	17
11074	11074	11074	17
11074	11074	11074	12
11074	11074	11074	12
11074	11074	11074	10
11074	11074	11074	9
11074	11074	11074	9
11074	11074	11074	8
11074	11074	11074	8
11074	11074	11074	7
11074	11074	11074	7
11074	11074	11074	7
11074	11074	11074	6
11074	11074	11074	5
11074	11074	11074	5
11074	11074	11074	5
11074	11074	11074	5
11074	11074	11074	5
11074	11074	11074	4
11074	11074	11074	4
11074	11074	11074	4
11074	11074	11074	3
11074	11074	11074	3
11074	11074	11074	3
11074	11074	11074	3
11074	11074	11074	2
11074	11074	11074	2
11074	11074	11074	2
11074	11074	11074	2
11074	11074	11074	2
11074	11074	11074	2
11074	11074	11074	1
11074	11074	11074	1
11074	11074	11074	1
11074	11074	11074	1
11074	11074	11074	1
11074	11074	11074	1
11074	11074	11074	1
11074	11074	11074	1
11074	11074	11074	1
11075	11075	11075	80
11075	11075	11075	37
11075	11075	11075	36
11075	11075	11075	20
11075	11075	11075	19
11075	11075	11075	18
11075	11075	11075	18
11075	11075	11075	16
11075	11075	11075	16
11075	11075	11075	15
11075	11075	11075	11
11075	11075	11075	11
11075	11075	11075	10
11075	11075	11075	8
11075	11075	11075	7
11075	11075	11075	7
11075	11075	11075	7
11075	11075	11075	6
11075	11075	11075	5
11075	11075	11075	5
11075	11075	11075	4
11075	11075	11075	3
11075	11075	11075	3
11075	11075	11075	3
11075	11075	11075	3
11075	11075	11075	3
11075	11075	11075	2
11075	11075	11075	2
11075	11075	11075	2
11075	11075	11075	2
11075	11075	11075	2
11075	11075	11075	1
11075	11075	11075	1
11075	11075	11075	1
11075	11075	11075	1
11075	11075	11075	1
11075	11075	11075	1
11075	11075	11075	1
11075	11075	11075	1
11075	11075	11075	1
11075	11075	11075	1
11081	11081	11081	172
11081	11081	11081	87
11081	11081	11081	61
11081	11081	11081	55
11081	11081	11081	34
11081	11081	11081	28
11081	11081	11081	26
11081	11081	11081	25
11081	11081	11081	20
11081	11081	11081	15
11081	11081	11081	14
11081	11081	11081	14
11081	11081	11081	13
11081	11081	11081	10
11081	11081	11081	9
11081	11081	11081	9
11081	11081	11081	9
11081	11081	11081	9
11081	11081	11081	9
11081	11081	11081	9
11081	11081	11081	7
11081	11081	11081	6
11081	11081	11081	6
11081	11081	11081	6
11081	11081	11081	6
11081	11081	11081	5
11081	11081	11081	4
11081	11081	11081	4
11081	11081	11081	3
11081	11081	11081	3
11081	11081	11081	2
11081	11081	11081	2
11081	11081	11081	2
11081	11081	11081	2
11081	11081	11081	1
11081	11081	11081	1
11081	11081	11081	1
11081	11081	11081	1
11081	11081	11081	1
11081	11081	11081	1
11081	11081	11081	1
11081	11081	11081	1
11081	11081	11081	1
11126	11126	11126	62
11126	11126	11126	36
11126	11126	11126	36
11126	11126	11126	36
11126	11126	11126	33
11126	11126	11126	33
11126	11126	11126	31
11126	11126	11126	27
11126	11126	11126	21
11126	11126	11126	18
11126	11126	11126	16
11126	11126	11126	14
11126	11126	11126	13
11126	11126	11126	12
11126	11126	11126	11
11126	11126	11126	9
11126	11126	11126	7
11126	11126	11126	6
11126	11126	11126	6
11126	11126	11126	6
11126	11126	11126	5
11126	11126	11126	5
11126	11126	11126	5
11126	11126	11126	5
11126	11126	11126	4
11126	11126	11126	4
11126	11126	11126	3
11126	11126	11126	3
11126	11126	11126	2
11126	11126	11126	2
11126	11126	11126	2
11126	11126	11126	2
11126	11126	11126	1
11126	11126	11126	1
11126	11126	11126	1
11126	11126	11126	1
11126	11126	11126	1
11137	11137	11137	40
11137	11137	11137	37
11137	11137	11137	36
11137	11137	11137	31
11137	11137	11137	24
11137	11137	11137	18
11137	11137	11137	16
11137	11137	11137	15
11137	11137	11137	14
11137	11137	11137	9
11137	11137	11137	9
11137	11137	11137	8
11137	11137	11137	8
11137	11137	11137	6
11137	11137	11137	6
11137	11137	11137	5
11137	11137	11137	5
11137	11137	11137	2
11137	11137	11137	2
11137	11137	11137	2
11137	11137	11137	2
11137	11137	11137	2
11137	11137	11137	2
11137	11137	11137	2
11137	11137	11137	1
11137	11137	11137	1
11137	11137	11137	1
11137	11137	11137	1
11137	11137	11137	1
11137	11137	11137	1
11137	11137	11137	1
11137	11137	11137	1
11137	11137	11137	1
11137	11137	11137	1
11198	11198	11198	61
11198	11198	11198	56
11198	11198	11198	32
11198	11198	11198	31
11198	11198	11198	30
11198	11198	11198	24
11198	11198	11198	22
11198	11198	11198	21
11198	11198	11198	20
11198	11198	11198	19
11198	11198	11198	19
11198	11198	11198	17
11198	11198	11198	16
11198	11198	11198	13
11198	11198	11198	12
11198	11198	11198	11
11198	11198	11198	10
11198	11198	11198	8
11198	11198	11198	6
11198	11198	11198	5
11198	11198	11198	4
11198	11198	11198	4
11198	11198	11198	1
11198	11198	11198	1
11204	11204	11204	64
11204	11204	11204	53
11204	11204	11204	43
11204	11204	11204	35
11204	11204	11204	35
11204	11204	11204	33
11204	11204	11204	32
11204	11204	11204	27
11204	11204	11204	26
11204	11204	11204	22
11204	11204	11204	19
11204	11204	11204	19
11204	11204	11204	17
11204	11204	11204	16
11204	11204	11204	16
11204	11204	11204	14
11204	11204	11204	14
11204	11204	11204	12
11204	11204	11204	12
11204	11204	11204	11
11204	11204	11204	10
11204	11204	11204	10
11204	11204	11204	10
11204	11204	11204	9
11204	11204	11204	8
11204	11204	11204	8
11204	11204	11204	7
11204	11204	11204	7
11204	11204	11204	7
11204	11204	11204	7
11204	11204	11204	5
11204	11204	11204	5
11204	11204	11204	5
11204	11204	11204	5
11204	11204	11204	4
11204	11204	11204	4
11204	11204	11204	4
11204	11204	11204	4
11204	11204	11204	4
11204	11204	11204	3
11204	11204	11204	3
11204	11204	11204	3
11204	11204	11204	3
11204	11204	11204	3
11204	11204	11204	2
11204	11204	11204	2
11204	11204	11204	2
11204	11204	11204	2
11204	11204	11204	2
11204	11204	11204	2
11204	11204	11204	2
11204	11204	11204	2
11204	11204	11204	1
11204	11204	11204	1
11204	11204	11204	1
11204	11204	11204	1
11204	11204	11204	1
11204	11204	11204	1
11204	11204	11204	1
11208	11208	11208	40
11208	11208	11208	36
11208	11208	11208	25
11208	11208	11208	25
11208	11208	11208	23
11208	11208	11208	22
11208	11208	11208	22
11208	11208	11208	19
11208	11208	11208	18
11208	11208	11208	17
11208	11208	11208	17
11208	11208	11208	17
11208	11208	11208	11
11208	11208	11208	10
11208	11208	11208	10
11208	11208	11208	9
11208	11208	11208	9
11208	11208	11208	9
11208	11208	11208	9
11208	11208	11208	8
11208	11208	11208	8
11208	11208	11208	8
11208	11208	11208	7
11208	11208	11208	7
11208	11208	11208	7
11208	11208	11208	7
11208	11208	11208	7
11208	11208	11208	6
11208	11208	11208	6
11208	11208	11208	5
11208	11208	11208	5
11208	11208	11208	5
11208	11208	11208	5
11208	11208	11208	5
11208	11208	11208	4
11208	11208	11208	4
11208	11208	11208	4
11208	11208	11208	4
11208	11208	11208	4
11208	11208	11208	4
11208	11208	11208	3
11208	11208	11208	3
11208	11208	11208	3
11208	11208	11208	3
11208	11208	11208	3
11208	11208	11208	3
11208	11208	11208	3
11208	11208	11208	3
11208	11208	11208	3
11208	11208	11208	3
11208	11208	11208	3
11208	11208	11208	3
11208	11208	11208	3
11208	11208	11208	2
11208	11208	11208	2
11208	11208	11208	2
11208	11208	11208	2
11208	11208	11208	2
11208	11208	11208	2
11208	11208	11208	2
11208	11208	11208	2
11208	11208	11208	1
11208	11208	11208	1
11208	11208	11208	1
11208	11208	11208	1
11208	11208	11208	1
11208	11208	11208	1
11208	11208	11208	1
11208	11208	11208	1
11208	11208	11208	1
11208	11208	11208	1
11208	11208	11208	1
11208	11208	11208	1
11208	11208	11208	1
11212	11212	11212	143
11212	11212	11212	58
11212	11212	11212	38
11212	11212	11212	27
11212	11212	11212	25
11212	11212	11212	24
11212	11212	11212	17
11212	11212	11212	13
11212	11212	11212	11
11212	11212	11212	10
11212	11212	11212	10
11212	11212	11212	9
11212	11212	11212	8
11212	11212	11212	8
11212	11212	11212	4
11212	11212	11212	3
11212	11212	11212	3
11212	11212	11212	3
11212	11212	11212	2
11212	11212	11212	2
11212	11212	11212	1
11212	11212	11212	1
11212	11212	11212	1
11212	11212	11212	1
11212	11212	11212	1
11212	11212	11212	1
11212	11212	11212	1
11213	11213	11213	120
11213	11213	11213	98
11213	11213	11213	46
11213	11213	11213	36
11213	11213	11213	25
11213	11213	11213	23
11213	11213	11213	22
11213	11213	11213	21
11213	11213	11213	19
11213	11213	11213	18
11213	11213	11213	17
11213	11213	11213	17
11213	11213	11213	15
11213	11213	11213	15
11213	11213	11213	14
11213	11213	11213	13
11213	11213	11213	12
11213	11213	11213	12
11213	11213	11213	12
11213	11213	11213	11
11213	11213	11213	10
11213	11213	11213	9
11213	11213	11213	7
11213	11213	11213	6
11213	11213	11213	6
11213	11213	11213	6
11213	11213	11213	6
11213	11213	11213	5
11213	11213	11213	5
11213	11213	11213	5
11213	11213	11213	4
11213	11213	11213	4
11213	11213	11213	3
11213	11213	11213	3
11213	11213	11213	2
11213	11213	11213	2
11213	11213	11213	2
11213	11213	11213	2
11213	11213	11213	2
11213	11213	11213	2
11213	11213	11213	2
11213	11213	11213	2
11213	11213	11213	1
11213	11213	11213	1
11213	11213	11213	1
11213	11213	11213	1
11213	11213	11213	1
11213	11213	11213	1
11213	11213	11213	1
11213	11213	11213	1
11213	11213	11213	1
11213	11213	11213	1
11220	11220	11220	110
11220	11220	11220	103
11220	11220	11220	59
11220	11220	11220	58
11220	11220	11220	44
11220	11220	11220	44
11220	11220	11220	39
11220	11220	11220	36
11220	11220	11220	30
11220	11220	11220	25
11220	11220	11220	25
11220	11220	11220	25
11220	11220	11220	24
11220	11220	11220	24
11220	11220	11220	24
11220	11220	11220	22
11220	11220	11220	19
11220	11220	11220	18
11220	11220	11220	16
11220	11220	11220	16
11220	11220	11220	16
11220	11220	11220	15
11220	11220	11220	15
11220	11220	11220	15
11220	11220	11220	14
11220	11220	11220	14
11220	11220	11220	13
11220	11220	11220	12
11220	11220	11220	12
11220	11220	11220	11
11220	11220	11220	11
11220	11220	11220	10
11220	11220	11220	9
11220	11220	11220	9
11220	11220	11220	9
11220	11220	11220	9
11220	11220	11220	8
11220	11220	11220	8
11220	11220	11220	7
11220	11220	11220	7
11220	11220	11220	7
11220	11220	11220	6
11220	11220	11220	6
11220	11220	11220	5
11220	11220	11220	5
11220	11220	11220	5
11220	11220	11220	4
11220	11220	11220	4
11220	11220	11220	4
11220	11220	11220	4
11220	11220	11220	4
11220	11220	11220	3
11220	11220	11220	3
11220	11220	11220	3
11220	11220	11220	3
11220	11220	11220	3
11220	11220	11220	3
11220	11220	11220	3
11220	11220	11220	3
11220	11220	11220	3
11220	11220	11220	2
11220	11220	11220	2
11220	11220	11220	2
11220	11220	11220	2
11220	11220	11220	2
11220	11220	11220	2
11220	11220	11220	2
11220	11220	11220	1
11220	11220	11220	1
11220	11220	11220	1
11220	11220	11220	1
11220	11220	11220	1
11222	11222	11222	49
11222	11222	11222	39
11222	11222	11222	37
11222	11222	11222	25
11222	11222	11222	24
11222	11222	11222	20
11222	11222	11222	18
11222	11222	11222	17
11222	11222	11222	13
11222	11222	11222	11
11222	11222	11222	11
11222	11222	11222	10
11222	11222	11222	10
11222	11222	11222	10
11222	11222	11222	10
11222	11222	11222	8
11222	11222	11222	8
11222	11222	11222	6
11222	11222	11222	6
11222	11222	11222	5
11222	11222	11222	5
11222	11222	11222	5
11222	11222	11222	4
11222	11222	11222	4
11222	11222	11222	4
11222	11222	11222	3
11222	11222	11222	3
11222	11222	11222	3
11222	11222	11222	3
11222	11222	11222	3
11222	11222	11222	3
11222	11222	11222	3
11222	11222	11222	3
11222	11222	11222	2
11222	11222	11222	2
11222	11222	11222	2
11222	11222	11222	2
11222	11222	11222	2
11222	11222	11222	1
11222	11222	11222	1
11222	11222	11222	1
11222	11222	11222	1
11222	11222	11222	1
11222	11222	11222	1
11222	11222	11222	1
11222	11222	11222	1
11222	11222	11222	1
11223	11223	11223	58
11223	11223	11223	54
11223	11223	11223	44
11223	11223	11223	38
11223	11223	11223	37
11223	11223	11223	31
11223	11223	11223	27
11223	11223	11223	27
11223	11223	11223	25
11223	11223	11223	24
11223	11223	11223	22
11223	11223	11223	22
11223	11223	11223	22
11223	11223	11223	20
11223	11223	11223	17
11223	11223	11223	16
11223	11223	11223	15
11223	11223	11223	15
11223	11223	11223	15
11223	11223	11223	14
11223	11223	11223	11
11223	11223	11223	9
11223	11223	11223	8
11223	11223	11223	8
11223	11223	11223	7
11223	11223	11223	7
11223	11223	11223	7
11223	11223	11223	6
11223	11223	11223	6
11223	11223	11223	6
11223	11223	11223	5
11223	11223	11223	5
11223	11223	11223	4
11223	11223	11223	4
11223	11223	11223	4
11223	11223	11223	4
11223	11223	11223	4
11223	11223	11223	3
11223	11223	11223	3
11223	11223	11223	2
11223	11223	11223	2
11223	11223	11223	2
11223	11223	11223	2
11223	11223	11223	1
11223	11223	11223	1
11223	11223	11223	1
11223	11223	11223	1
11223	11223	11223	1
11223	11223	11223	1
11223	11223	11223	1
11223	11223	11223	1
11223	11223	11223	1
11223	11223	11223	1
11234	11234	11234	68
11234	11234	11234	65
11234	11234	11234	41
11234	11234	11234	37
11234	11234	11234	37
11234	11234	11234	36
11234	11234	11234	32
11234	11234	11234	24
11234	11234	11234	20
11234	11234	11234	20
11234	11234	11234	19
11234	11234	11234	16
11234	11234	11234	16
11234	11234	11234	15
11234	11234	11234	14
11234	11234	11234	9
11234	11234	11234	7
11234	11234	11234	7
11234	11234	11234	7
11234	11234	11234	7
11234	11234	11234	6
11234	11234	11234	5
11234	11234	11234	5
11234	11234	11234	4
11234	11234	11234	4
11234	11234	11234	4
11234	11234	11234	4
11234	11234	11234	4
11234	11234	11234	3
11234	11234	11234	3
11234	11234	11234	3
11234	11234	11234	3
11234	11234	11234	2
11234	11234	11234	2
11234	11234	11234	2
11234	11234	11234	2
11234	11234	11234	2
11234	11234	11234	2
11234	11234	11234	2
11234	11234	11234	2
11234	11234	11234	2
11234	11234	11234	1
11234	11234	11234	1
11234	11234	11234	1
11234	11234	11234	1
11235	11235	11235	58
11235	11235	11235	44
11235	11235	11235	31
11235	11235	11235	30
11235	11235	11235	28
11235	11235	11235	27
11235	11235	11235	24
11235	11235	11235	24
11235	11235	11235	23
11235	11235	11235	19
11235	11235	11235	18
11235	11235	11235	17
11235	11235	11235	17
11235	11235	11235	16
11235	11235	11235	16
11235	11235	11235	16
11235	11235	11235	13
11235	11235	11235	12
11235	11235	11235	12
11235	11235	11235	11
11235	11235	11235	11
11235	11235	11235	10
11235	11235	11235	9
11235	11235	11235	9
11235	11235	11235	9
11235	11235	11235	8
11235	11235	11235	8
11235	11235	11235	7
11235	11235	11235	6
11235	11235	11235	5
11235	11235	11235	5
11235	11235	11235	5
11235	11235	11235	5
11235	11235	11235	5
11235	11235	11235	4
11235	11235	11235	4
11235	11235	11235	4
11235	11235	11235	4
11235	11235	11235	3
11235	11235	11235	3
11235	11235	11235	3
11235	11235	11235	2
11235	11235	11235	2
11235	11235	11235	2
11235	11235	11235	1
11235	11235	11235	1
11235	11235	11235	1
11236	11236	11236	65
11236	11236	11236	24
11236	11236	11236	20
11236	11236	11236	19
11236	11236	11236	18
11236	11236	11236	13
11236	11236	11236	11
11236	11236	11236	11
11236	11236	11236	10
11236	11236	11236	9
11236	11236	11236	9
11236	11236	11236	8
11236	11236	11236	8
11236	11236	11236	8
11236	11236	11236	7
11236	11236	11236	7
11236	11236	11236	6
11236	11236	11236	6
11236	11236	11236	6
11236	11236	11236	6
11236	11236	11236	5
11236	11236	11236	5
11236	11236	11236	5
11236	11236	11236	5
11236	11236	11236	5
11236	11236	11236	5
11236	11236	11236	4
11236	11236	11236	4
11236	11236	11236	4
11236	11236	11236	4
11236	11236	11236	4
11236	11236	11236	4
11236	11236	11236	3
11236	11236	11236	2
11236	11236	11236	2
11236	11236	11236	1
11236	11236	11236	1
11236	11236	11236	1
11236	11236	11236	1
11236	11236	11236	1
11236	11236	11236	1
11236	11236	11236	1
11244	11244	11244	74
11244	11244	11244	46
11244	11244	11244	28
11244	11244	11244	27
11244	11244	11244	20
11244	11244	11244	19
11244	11244	11244	18
11244	11244	11244	15
11244	11244	11244	15
11244	11244	11244	14
11244	11244	11244	14
11244	11244	11244	14
11244	11244	11244	13
11244	11244	11244	13
11244	11244	11244	12
11244	11244	11244	11
11244	11244	11244	9
11244	11244	11244	9
11244	11244	11244	9
11244	11244	11244	8
11244	11244	11244	8
11244	11244	11244	8
11244	11244	11244	8
11244	11244	11244	8
11244	11244	11244	7
11244	11244	11244	7
11244	11244	11244	7
11244	11244	11244	5
11244	11244	11244	5
11244	11244	11244	5
11244	11244	11244	5
11244	11244	11244	5
11244	11244	11244	5
11244	11244	11244	4
11244	11244	11244	4
11244	11244	11244	4
11244	11244	11244	4
11244	11244	11244	4
11244	11244	11244	3
11244	11244	11244	3
11244	11244	11244	3
11244	11244	11244	3
11244	11244	11244	2
11244	11244	11244	2
11244	11244	11244	2
11244	11244	11244	2
11244	11244	11244	2
11244	11244	11244	2
11244	11244	11244	2
11244	11244	11244	1
11244	11244	11244	1
11244	11244	11244	1
11255	11255	11255	69
11255	11255	11255	49
11255	11255	11255	30
11255	11255	11255	25
11255	11255	11255	22
11255	11255	11255	22
11255	11255	11255	21
11255	11255	11255	19
11255	11255	11255	17
11255	11255	11255	17
11255	11255	11255	15
11255	11255	11255	15
11255	11255	11255	14
11255	11255	11255	11
11255	11255	11255	11
11255	11255	11255	10
11255	11255	11255	10
11255	11255	11255	7
11255	11255	11255	7
11255	11255	11255	7
11255	11255	11255	6
11255	11255	11255	5
11255	11255	11255	5
11255	11255	11255	5
11255	11255	11255	4
11255	11255	11255	4
11255	11255	11255	4
11255	11255	11255	3
11255	11255	11255	3
11255	11255	11255	2
11255	11255	11255	2
11255	11255	11255	2
11255	11255	11255	2
11255	11255	11255	2
11255	11255	11255	2
11255	11255	11255	2
11255	11255	11255	2
11255	11255	11255	2
11255	11255	11255	2
11255	11255	11255	2
11255	11255	11255	1
11255	11255	11255	1
11255	11255	11255	1
11265	11265	11265	49
11265	11265	11265	44
11265	11265	11265	43
11265	11265	11265	39
11265	11265	11265	38
11265	11265	11265	36
11265	11265	11265	34
11265	11265	11265	32
11265	11265	11265	26
11265	11265	11265	25
11265	11265	11265	24
11265	11265	11265	22
11265	11265	11265	20
11265	11265	11265	20
11265	11265	11265	19
11265	11265	11265	17
11265	11265	11265	17
11265	11265	11265	16
11265	11265	11265	14
11265	11265	11265	13
11265	11265	11265	11
11265	11265	11265	10
11265	11265	11265	10
11265	11265	11265	9
11265	11265	11265	9
11265	11265	11265	8
11265	11265	11265	8
11265	11265	11265	7
11265	11265	11265	6
11265	11265	11265	5
11265	11265	11265	5
11265	11265	11265	5
11265	11265	11265	4
11265	11265	11265	4
11265	11265	11265	4
11265	11265	11265	4
11265	11265	11265	4
11265	11265	11265	4
11265	11265	11265	3
11265	11265	11265	3
11265	11265	11265	3
11265	11265	11265	2
11265	11265	11265	2
11265	11265	11265	2
11265	11265	11265	2
11265	11265	11265	2
11265	11265	11265	1
11265	11265	11265	1
11265	11265	11265	1
11265	11265	11265	1
11265	11265	11265	1
11265	11265	11265	1
11265	11265	11265	1
11265	11265	11265	1
11270	11270	11270	73
11270	11270	11270	58
11270	11270	11270	50
11270	11270	11270	49
11270	11270	11270	45
11270	11270	11270	29
11270	11270	11270	28
11270	11270	11270	28
11270	11270	11270	28
11270	11270	11270	27
11270	11270	11270	27
11270	11270	11270	24
11270	11270	11270	23
11270	11270	11270	23
11270	11270	11270	22
11270	11270	11270	20
11270	11270	11270	19
11270	11270	11270	19
11270	11270	11270	18
11270	11270	11270	17
11270	11270	11270	16
11270	11270	11270	15
11270	11270	11270	14
11270	11270	11270	14
11270	11270	11270	12
11270	11270	11270	10
11270	11270	11270	8
11270	11270	11270	8
11270	11270	11270	7
11270	11270	11270	7
11270	11270	11270	7
11270	11270	11270	6
11270	11270	11270	6
11270	11270	11270	6
11270	11270	11270	5
11270	11270	11270	5
11270	11270	11270	5
11270	11270	11270	4
11270	11270	11270	4
11270	11270	11270	4
11270	11270	11270	3
11270	11270	11270	3
11270	11270	11270	3
11270	11270	11270	2
11270	11270	11270	2
11270	11270	11270	2
11270	11270	11270	2
11270	11270	11270	2
11270	11270	11270	2
11270	11270	11270	2
11270	11270	11270	2
11270	11270	11270	1
11270	11270	11270	1
11270	11270	11270	1
11270	11270	11270	1
11270	11270	11270	1
11270	11270	11270	1
11270	11270	11270	1
11270	11270	11270	1
11309	11309	11309	36
11309	11309	11309	29
11309	11309	11309	23
11309	11309	11309	22
11309	11309	11309	21
11309	11309	11309	17
11309	11309	11309	15
11309	11309	11309	15
11309	11309	11309	15
11309	11309	11309	14
11309	11309	11309	10
11309	11309	11309	8
11309	11309	11309	6
11309	11309	11309	6
11309	11309	11309	5
11309	11309	11309	5
11309	11309	11309	5
11309	11309	11309	4
11309	11309	11309	4
11309	11309	11309	4
11309	11309	11309	3
11309	11309	11309	3
11309	11309	11309	3
11309	11309	11309	3
11309	11309	11309	3
11309	11309	11309	2
11309	11309	11309	2
11309	11309	11309	2
11309	11309	11309	2
11309	11309	11309	2
11309	11309	11309	2
11309	11309	11309	1
11309	11309	11309	1
11309	11309	11309	1
11309	11309	11309	1
11309	11309	11309	1
11309	11309	11309	1
11309	11309	11309	1
11309	11309	11309	1
11309	11309	11309	1
11332	11332	11332	65
11332	11332	11332	57
11332	11332	11332	54
11332	11332	11332	33
11332	11332	11332	20
11332	11332	11332	17
11332	11332	11332	10
11332	11332	11332	9
11332	11332	11332	9
11332	11332	11332	5
11332	11332	11332	5
11332	11332	11332	4
11332	11332	11332	4
11332	11332	11332	3
11332	11332	11332	3
11332	11332	11332	3
11332	11332	11332	3
11332	11332	11332	3
11332	11332	11332	2
11332	11332	11332	2
11332	11332	11332	1
11332	11332	11332	1
11332	11332	11332	1
11332	11332	11332	1
11332	11332	11332	1
11332	11332	11332	1
11332	11332	11332	1
11402	11402	11402	134
11402	11402	11402	69
11402	11402	11402	41
11402	11402	11402	34
11402	11402	11402	28
11402	11402	11402	20
11402	11402	11402	16
11402	11402	11402	16
11402	11402	11402	16
11402	11402	11402	16
11402	11402	11402	15
11402	11402	11402	14
11402	11402	11402	12
11402	11402	11402	12
11402	11402	11402	12
11402	11402	11402	11
11402	11402	11402	10
11402	11402	11402	10
11402	11402	11402	9
11402	11402	11402	8
11402	11402	11402	7
11402	11402	11402	6
11402	11402	11402	6
11402	11402	11402	6
11402	11402	11402	5
11402	11402	11402	5
11402	11402	11402	5
11402	11402	11402	5
11402	11402	11402	4
11402	11402	11402	4
11402	11402	11402	4
11402	11402	11402	3
11402	11402	11402	3
11402	11402	11402	3
11402	11402	11402	3
11402	11402	11402	3
11402	11402	11402	2
11402	11402	11402	2
11402	11402	11402	2
11402	11402	11402	2
11402	11402	11402	2
[truncated: 124,409 more rows]
