# Supplementary material for: A general pattern of the species abundance distribution
Source: PeerJ. 2018 Nov 13;6:e5928. doi: 10.7717/peerj.5928 (PMC6238767; doi:10.7717/peerj.5928)
Supplement: Supplemental Information 11 — R2 of the fractal model on eight datasets [file peerj-06-5928-s011.xlsx]

## Sheet: 工作表1
R2diR2om	R2fish	R2bbs	R2cbc	R2fia	R2gentry	R2mcdb	R2nabc	R2total
0.808252	0.888181	0.816717	0.636767	0.963903	0.949644	0.660335	0.830633	0.808252			COUNT	MAX	MIN	AVERAGE	MEDIAN	SE
0.899415	0.768142	0.88654	0.787251	0.965562	0.932993	0.883846	0.931765	0.899415		R2diR2om	3224	0.999521	0.45994	0.901387	0.916512	0.00110889
0.835098	0.872825	0.790105	0.884591	0.938306	0.870376	0.930471	0.833184	0.835098		R2fish	761	0.997105	0.396979	0.828671	0.840804	0.00355466
0.838886	0.823619	0.746643	0.759013	0.955969	0.94368	0.825888	0.805152	0.838886		R2bbs	2769	0.982172	0.554694	0.791296	0.792357	0.00146617
0.891918	0.844143	0.71367	0.854936	0.965638	0.876277	0.78925	0.859865	0.891918		R2cbc	1999	0.990327	0.474163	0.785205	0.787219	0.0019567
0.884959	0.847798	0.868862	0.841127	0.927068	0.853322	0.947762	0.917031	0.884959		R2fia	10355	0.988963	0.0886943	0.860143	0.880127	0.000811909
0.93326	0.643407	0.93452	0.748118	0.718917	0.920076	0.873817	0.69769	0.93326		R2gentry	222	0.969275	0.639865	0.89199	0.911308	0.00406673
0.840362	0.747651	0.93509	0.702395	0.826299	0.913535	0.915865	0.884144	0.840362		R2mcdb	103	0.980628	0.466125	0.837844	0.869162	0.0107261
0.890249	0.93515	0.817747	0.860305	0.942345	0.953771	0.965425	0.765365	0.890249		R2nabc	400	0.985879	0.639463	0.872042	0.883673	0.00350737
0.860123	0.885471	0.821425	0.850227	0.912217	0.943607	0.917218	0.859771	0.860123		R2total	19833	0.999521	0.0886943	0.848955	0.866917	0.000627655
0.868483	0.846745	0.733334	0.894335	0.694957	0.943444	0.873576	0.877147	0.868483
0.93566	0.92055	0.849932	0.804582	0.794601	0.731529	0.923909	0.809061	0.93566
0.888797	0.846693	0.774848	0.748348	0.755224	0.942233	0.830433	0.951193	0.888797
0.917545	0.864076	0.60431	0.819935	0.889189	0.937092	0.517524	0.72866	0.917545
0.945389	0.664131	0.79634	0.968932	0.818371	0.914425	0.762892	0.937919	0.945389
0.874804	0.840418	0.699514	0.949256	0.923105	0.829139	0.950108	0.967049	0.874804
0.924793	0.688596	0.733959	0.830519	0.867631	0.941715	0.962157	0.816037	0.924793
0.797585	0.725828	0.674771	0.869812	0.897011	0.913294	0.832395	0.799849	0.797585
0.964034	0.913363	0.833771	0.725981	0.931021	0.885765	0.918103	0.81158	0.964034
0.920281	0.950382	0.743826	0.712821	0.941328	0.95952	0.918138	0.874158	0.920281
0.952761	0.856006	0.802503	0.908382	0.855466	0.891436	0.641972	0.761837	0.952761
0.914663	0.851494	0.638329	0.910652	0.909158	0.916708	0.921326	0.849165	0.914663
0.934492	0.930373	0.86031	0.772441	0.918806	0.828818	0.731393	0.750983	0.934492
0.918073	0.864901	0.869481	0.79746	0.773277	0.87293	0.669683	0.922659	0.918073
0.935805	0.886037	0.730856	0.806596	0.890519	0.795682	0.871296	0.863197	0.935805
0.846155	0.870963	0.760037	0.849805	0.765325	0.904037	0.954043	0.961161	0.846155
0.929088	0.935373	0.615044	0.728046	0.745683	0.938506	0.915452	0.80937	0.929088
0.896437	0.596705	0.746294	0.892287	0.917384	0.84184	0.845525	0.936059	0.896437
0.930865	0.809188	0.766827	0.836809	0.915593	0.913668	0.840847	0.854344	0.930865
0.78733	0.807386	0.884585	0.863185	0.842988	0.782268	0.850867	0.792811	0.78733
0.920661	0.847491	0.83041	0.813643	0.85666	0.943863	0.912264	0.754413	0.920661
0.850484	0.816882	0.777251	0.88837	0.844066	0.941512	0.869162	0.949883	0.850484
0.923845	0.828721	0.811627	0.954246	0.907205	0.857438	0.871396	0.944769	0.923845
0.877033	0.819232	0.666501	0.755695	0.937906	0.942991	0.650462	0.86228	0.877033
0.931981	0.699138	0.791414	0.758761	0.839243	0.833487	0.813489	0.953585	0.931981
0.973298	0.929988	0.710914	0.730072	0.854808	0.918093	0.830176	0.916162	0.973298
0.928416	0.861227	0.818298	0.971985	0.881859	0.922932	0.754517	0.952	0.928416
0.862916	0.882221	0.846697	0.747684	0.932848	0.903428	0.698716	0.945247	0.862916
0.941118	0.844259	0.826055	0.686271	0.88055	0.958626	0.673818	0.893113	0.941118
0.888932	0.781393	0.632083	0.783388	0.860444	0.956914	0.661046	0.886081	0.888932
0.757052	0.955964	0.680952	0.815901	0.888963	0.853129	0.802879	0.859172	0.757052
0.881081	0.669237	0.790441	0.65055	0.730313	0.922718	0.920903	0.960224	0.881081
0.827955	0.930709	0.869096	0.775691	0.924778	0.963447	0.941909	0.951203	0.827955
0.8208	0.86041	0.914836	0.842889	0.85055	0.830724	0.802794	0.954227	0.8208
0.724807	0.942774	0.748769	0.870027	0.940682	0.832956	0.927324	0.882555	0.724807
0.889611	0.961556	0.79608	0.677873	0.740224	0.933594	0.934898	0.817663	0.889611
0.935015	0.960365	0.780842	0.691263	0.932764	0.901753	0.688485	0.826803	0.935015
0.942492	0.920837	0.893089	0.556629	0.889137	0.783966	0.466125	0.893477	0.942492
0.777996	0.892907	0.658411	0.768414	0.714546	0.922444	0.872601	0.859794	0.777996
0.942745	0.870089	0.688927	0.759069	0.863189	0.908518	0.926936	0.82443	0.942745
0.941322	0.947366	0.889922	0.796088	0.846946	0.929001	0.828585	0.850914	0.941322
0.902417	0.815159	0.777045	0.81508	0.714929	0.82061	0.825324	0.95665	0.902417
0.960036	0.859836	0.749164	0.748771	0.890866	0.945693	0.82062	0.974894	0.960036
0.866617	0.728266	0.87869	0.784247	0.712098	0.927039	0.958054	0.809255	0.866617
0.96018	0.823366	0.804847	0.945537	0.896261	0.903957	0.896726	0.893687	0.96018
0.946846	0.641965	0.743482	0.592156	0.823204	0.862168	0.914116	0.859812	0.946846
0.880387	0.836302	0.654606	0.789846	0.774614	0.949071	0.870301	0.921589	0.880387
0.951567	0.943035	0.82407	0.848606	0.801326	0.920078	0.902626	0.843907	0.951567
0.903491	0.81802	0.913723	0.703624	0.889969	0.810961	0.86398	0.75195	0.903491
0.91523	0.933232	0.892215	0.656725	0.813284	0.917223	0.796487	0.895465	0.91523
0.914063	0.790135	0.845847	0.78062	0.888573	0.863486	0.84839	0.885483	0.914063
0.964461	0.707419	0.882748	0.797257	0.943713	0.925308	0.845727	0.889384	0.964461
0.938154	0.722798	0.715921	0.728927	0.939941	0.916687	0.702018	0.910113	0.938154
0.918358	0.609483	0.858094	0.78829	0.880246	0.790128	0.90041	0.966043	0.918358
0.753772	0.950293	0.759623	0.798144	0.942941	0.880701	0.955826	0.865467	0.753772
0.764851	0.756022	0.896465	0.799586	0.873924	0.891848	0.887235	0.824732	0.764851
0.737971	0.805455	0.821653	0.74797	0.931698	0.833841	0.936315	0.855437	0.737971
0.97598	0.873273	0.660791	0.672405	0.948898	0.950015	0.833443	0.863838	0.97598
0.916961	0.864628	0.750337	0.700951	0.902654	0.887669	0.882953	0.937579	0.916961
0.889264	0.897993	0.88473	0.794726	0.83896	0.92121	0.731335	0.782938	0.889264
0.956134	0.957279	0.87369	0.886256	0.927629	0.811179	0.650062	0.94762	0.956134
0.868333	0.771592	0.655332	0.872337	0.895525	0.850326	0.721013	0.836605	0.868333
0.87014	0.791377	0.884873	0.899822	0.932576	0.902978	0.869401	0.731226	0.87014
0.756398	0.754505	0.754231	0.840695	0.864502	0.885677	0.770898	0.869925	0.756398
0.886863	0.457562	0.89454	0.780534	0.871251	0.918772	0.563312	0.796039	0.886863
0.872899	0.88968	0.572228	0.930575	0.893404	0.830446	0.944385	0.802535	0.872899
0.756952	0.730693	0.753798	0.706392	0.903653	0.852479	0.816983	0.886182	0.756952
0.934882	0.987463	0.675422	0.831738	0.684265	0.948995	0.755527	0.938724	0.934882
0.857039	0.933993	0.915153	0.809576	0.802512	0.902771	0.880886	0.742108	0.857039
0.964285	0.783339	0.750754	0.848091	0.90154	0.762767	0.948807	0.802924	0.964285
0.949139	0.957446	0.916671	0.725921	0.894936	0.879566	0.954983	0.721513	0.949139
0.839875	0.79135	0.691908	0.774674	0.560608	0.942165	0.962468	0.902264	0.839875
0.936661	0.961123	0.851814	0.820259	0.828956	0.662837	0.929701	0.723921	0.936661
0.973238	0.741971	0.901674	0.897839	0.84552	0.86167	0.966513	0.917438	0.973238
0.929271	0.70186	0.876065	0.803077	0.814267	0.92739	0.760877	0.89988	0.929271
0.978038	0.685532	0.764686	0.868307	0.864835	0.841374	0.967162	0.796529	0.978038
0.936254	0.833506	0.715161	0.835473	0.936475	0.848603	0.951246	0.750239	0.936254
0.785431	0.877864	0.853266	0.758753	0.787801	0.803605	0.980628	0.725554	0.785431
0.865889	0.901925	0.755395	0.782144	0.914487	0.950524	0.91635	0.706731	0.865889
0.808167	0.957374	0.577593	0.794064	0.892021	0.88225	0.794558	0.915028	0.808167
0.903123	0.891534	0.721029	0.807943	0.973434	0.927049	0.653534	0.920946	0.903123
0.951629	0.91628	0.872788	0.796578	0.829394	0.969275	0.947578	0.931538	0.951629
0.731201	0.886689	0.778701	0.677849	0.78249	0.691205	0.603608	0.840665	0.731201
0.921349	0.654642	0.760129	0.901536	0.821277	0.958312	0.863622	0.831729	0.921349
0.897595	0.725136	0.725855	0.670989	0.862395	0.846317	0.727646	0.852534	0.897595
0.912208	0.724829	0.90264	0.795066	0.881656	0.703711	0.791553	0.813302	0.912208
0.737071	0.803709	0.913958	0.611195	0.937378	0.639865	0.952731	0.918469	0.737071
0.802039	0.858518	0.825216	0.784487	0.467445	0.859654	0.810764	0.88416	0.802039
0.839074	0.880685	0.904567	0.715836	0.844281	0.879793	0.896772	0.916608	0.839074
0.925861	0.83186	0.722927	0.835079	0.900813	0.926549	0.902066	0.800451	0.925861
0.946468	0.837843	0.944745	0.641333	0.92112	0.910413	0.849827	0.913261	0.946468
0.45994	0.812054	0.944324	0.826294	0.829991	0.966992	0.749541	0.922107	0.45994
0.97809	0.807935	0.877431	0.77582	0.94494	0.928058	0.781064	0.936753	0.97809
0.852063	0.660944	0.694847	0.722037	0.805001	0.86577		0.952675	0.852063
0.954768	0.947294	0.749426	0.816494	0.936555	0.949054		0.929901	0.954768
0.862341	0.902657	0.720102	0.644972	0.909801	0.940967		0.928403	0.862341
0.950021	0.87559	0.881326	0.724117	0.953919	0.814244		0.804675	0.950021
0.809238	0.988594	0.642518	0.671836	0.938774	0.855139		0.764442	0.809238
0.879156	0.860469	0.803954	0.600016	0.950033	0.900252		0.859939	0.879156
0.912067	0.924659	0.775633	0.853635	0.928097	0.952375		0.826035	0.912067
0.934643	0.8203	0.826005	0.818369	0.952288	0.934104		0.933198	0.934643
0.798673	0.765501	0.929196	0.705144	0.720083	0.827205		0.964807	0.798673
0.812637	0.873583	0.799712	0.724215	0.898242	0.897037		0.798611	0.812637
0.954677	0.751618	0.836102	0.579143	0.827649	0.923722		0.912179	0.954677
0.811142	0.864393	0.764327	0.597917	0.887149	0.960229		0.775336	0.811142
0.93751	0.860564	0.776754	0.631062	0.934682	0.952479		0.981935	0.93751
0.962191	0.956703	0.824087	0.822135	0.916853	0.933256		0.726298	0.962191
0.961966	0.935085	0.865772	0.918402	0.778974	0.892049		0.894278	0.961966
0.94827	0.596821	0.620418	0.831698	0.964845	0.925599		0.816895	0.94827
0.85696	0.848694	0.705751	0.769332	0.900594	0.88035		0.885824	0.85696
0.975005	0.816903	0.89756	0.705385	0.934145	0.950145		0.803329	0.975005
0.856016	0.942243	0.726359	0.661465	0.893137	0.903383		0.94808	0.856016
0.838353	0.836963	0.77716	0.816036	0.772368	0.938218		0.810604	0.838353
0.939008	0.82688	0.696392	0.854565	0.916212	0.911504		0.82866	0.939008
0.783064	0.80622	0.923239	0.792316	0.908463	0.86932		0.957897	0.783064
0.972256	0.665344	0.606301	0.836587	0.833367	0.892723		0.876803	0.972256
0.926772	0.930098	0.748213	0.804517	0.90927	0.937331		0.884298	0.926772
0.925559	0.886673	0.797091	0.841244	0.926545	0.911385		0.85203	0.925559
0.958768	0.890289	0.835705	0.876577	0.942139	0.911231		0.843884	0.958768
0.851442	0.912251	0.802627	0.785418	0.943014	0.898666		0.818264	0.851442
0.957939	0.949965	0.705575	0.87133	0.905933	0.916292		0.933337	0.957939
0.937332	0.718009	0.896743	0.859082	0.809417	0.907387		0.712788	0.937332
0.979946	0.702567	0.911594	0.811607	0.915053	0.866516		0.891736	0.979946
0.862916	0.80638	0.805447	0.90881	0.734708	0.927243		0.730685	0.862916
0.945633	0.939506	0.794337	0.743416	0.882931	0.897816		0.811356	0.945633
0.894234	0.742817	0.804822	0.783027	0.954782	0.877957		0.84515	0.894234
0.882261	0.923899	0.76016	0.838676	0.749901	0.964128		0.914548	0.882261
0.909122	0.840468	0.757011	0.71303	0.894001	0.922616		0.890599	0.909122
0.863404	0.685597	0.791387	0.694596	0.824746	0.864173		0.863112	0.863404
0.861781	0.913273	0.659723	0.818771	0.772184	0.664098		0.883368	0.861781
0.964478	0.856625	0.667226	0.758611	0.805091	0.938339		0.839749	0.964478
0.899153	0.850332	0.773355	0.802001	0.746185	0.90742		0.979981	0.899153
0.896224	0.818375	0.85939	0.828376	0.500751	0.931757		0.793399	0.896224
0.752036	0.961947	0.554694	0.758306	0.928561	0.968872		0.917425	0.752036
0.913777	0.939332	0.777673	0.833503	0.911816	0.839773		0.917426	0.913777
0.928103	0.871375	0.68994	0.732709	0.830513	0.935322		0.741021	0.928103
0.896006	0.557868	0.794536	0.646192	0.786964	0.859994		0.639463	0.896006
0.96813	0.756337	0.750849	0.838623	0.91366	0.872629		0.892316	0.96813
0.931771	0.985009	0.841524	0.719179	0.907773	0.919082		0.785573	0.931771
0.877422	0.970479	0.783565	0.661393	0.933167	0.932884		0.725071	0.877422
0.884709	0.942653	0.85073	0.760823	0.857067	0.922845		0.814991	0.884709
0.947778	0.835328	0.780847	0.718573	0.890231	0.92		0.962979	0.947778
0.97505	0.966531	0.648992	0.823114	0.963303	0.918451		0.801268	0.97505
0.782549	0.969236	0.751854	0.766485	0.758135	0.95224		0.83891	0.782549
0.876874	0.969657	0.917378	0.761216	0.873148	0.932684		0.961989	0.876874
0.917078	0.961509	0.656062	0.62156	0.953683	0.769398		0.955847	0.917078
0.971287	0.925973	0.783342	0.795976	0.900507	0.89594		0.92518	0.971287
0.851665	0.960833	0.694843	0.833027	0.80039	0.933494		0.782027	0.851665
0.980126	0.780205	0.723199	0.84213	0.748988	0.78277		0.953089	0.980126
0.804447	0.764089	0.891139	0.756872	0.832586	0.810138		0.881436	0.804447
0.957589	0.892939	0.774098	0.61402	0.726543	0.896742		0.964303	0.957589
0.911464	0.739228	0.775913	0.803571	0.831684	0.90278		0.951531	0.911464
0.948164	0.713993	0.806347	0.683711	0.872141	0.891632		0.843917	0.948164
0.860841	0.61648	0.702399	0.876183	0.769437	0.928464		0.930503	0.860841
0.946957	0.799202	0.821666	0.850584	0.8098	0.851005		0.904584	0.946957
0.743959	0.964402	0.671465	0.71967	0.881444	0.947191		0.773197	0.743959
0.816636	0.806637	0.787324	0.74407	0.790963	0.918359		0.858097	0.816636
0.811745	0.901927	0.619234	0.802235	0.932894	0.77494		0.823361	0.811745
0.892395	0.70209	0.823025	0.628443	0.95014	0.942125		0.8201	0.892395
0.964452	0.797229	0.831704	0.763042	0.762864	0.92929		0.879528	0.964452
0.982014	0.817033	0.872343	0.75364	0.811793	0.912966		0.862439	0.982014
0.801745	0.793918	0.880354	0.706233	0.79949	0.844841		0.853904	0.801745
0.907173	0.790579	0.81892	0.564289	0.911505	0.939217		0.949952	0.907173
0.942274	0.763514	0.858423	0.706003	0.903314	0.894308		0.828963	0.942274
0.972804	0.745577	0.711585	0.691218	0.78101	0.913126		0.77521	0.972804
0.952919	0.6686	0.853693	0.731075	0.869786	0.891954		0.921314	0.952919
0.761089	0.717083	0.741256	0.8812	0.897012	0.968302		0.776679	0.761089
0.857834	0.76569	0.805953	0.764018	0.886729	0.866541		0.955876	0.857834
0.946677	0.769068	0.685923	0.766816	0.880451	0.814448		0.941345	0.946677
0.957808	0.744887	0.823157	0.606318	0.877745	0.918836		0.836579	0.957808
0.905375	0.797874	0.847097	0.915514	0.90839	0.925342		0.7221	0.905375
0.922676	0.87024	0.913918	0.924625	0.917023	0.944407		0.948046	0.922676
0.898531	0.883521	0.899233	0.800987	0.885832	0.881892		0.954801	0.898531
0.941325	0.530333	0.826891	0.833336	0.954922	0.907452		0.8816	0.941325
0.964526	0.887656	0.732826	0.78265	0.913033	0.949948		0.824422	0.964526
0.911591	0.839104	0.782672	0.780054	0.947739	0.896551		0.824975	0.911591
0.970952	0.791003	0.748053	0.860779	0.764988	0.928051		0.910848	0.970952
0.941928	0.764571	0.892016	0.923686	0.842208	0.914442		0.93127	0.941928
0.906605	0.812767	0.80446	0.814044	0.793042	0.941403		0.935834	0.906605
0.930886	0.760944	0.858711	0.812026	0.851031	0.745577		0.846448	0.930886
0.784183	0.639394	0.768885	0.595285	0.767637	0.952145		0.914906	0.784183
0.862426	0.903796	0.817569	0.674489	0.954737	0.903901		0.852404	0.862426
0.917486	0.864976	0.795762	0.680647	0.843087	0.909539		0.904737	0.917486
0.907883	0.837793	0.726734	0.797165	0.66236	0.849713		0.968268	0.907883
0.927418	0.948637	0.681601	0.794318	0.925478	0.779004		0.922383	0.927418
0.882421	0.932769	0.833615	0.738538	0.909935	0.884572		0.872606	0.882421
0.890315	0.968089	0.77855	0.640028	0.831203	0.959821		0.840599	0.890315
0.886696	0.729625	0.800017	0.761508	0.761254	0.885211		0.899249	0.886696
0.977513	0.775074	0.806345	0.803584	0.953084	0.941491		0.852977	0.977513
0.936216	0.569673	0.854228	0.895506	0.814396	0.900566		0.91459	0.936216
0.844382	0.825176	0.854159	0.748192	0.91098	0.917911		0.909443	0.844382
0.881003	0.870697	0.90933	0.783267	0.809562	0.928458		0.886517	0.881003
0.916543	0.96831	0.826979	0.803664	0.910815	0.833779		0.877759	0.916543
0.779713	0.888317	0.762051	0.664063	0.796312	0.787721		0.931102	0.779713
0.852213	0.890084	0.929634	0.745678	0.828582	0.912831		0.894083	0.852213
0.874397	0.941762	0.861211	0.788134	0.844087	0.903858		0.765649	0.874397
0.852165	0.920003	0.897915	0.767016	0.865429	0.960034		0.969023	0.852165
0.959657	0.962589	0.873102	0.838716	0.916696	0.913252		0.951666	0.959657
0.976563	0.647338	0.653162	0.788634	0.841251	0.794642		0.800207	0.976563
0.950923	0.832085	0.875576	0.760725	0.858459	0.890772		0.781678	0.950923
0.731201	0.686764	0.86605	0.775729	0.771801	0.959716		0.880217	0.731201
0.80587	0.766604	0.947615	0.832303	0.839691	0.934866		0.887596	0.80587
0.946363	0.823931	0.886901	0.91619	0.961871	0.947315		0.934025	0.946363
0.847403	0.840489	0.792134	0.827208	0.79841	0.86502		0.715785	0.847403
0.731201	0.960484	0.752841	0.83297	0.917316	0.921355		0.883503	0.731201
0.772804	0.902085	0.848512	0.80681	0.830224	0.949603		0.900922	0.772804
0.833231	0.854295	0.737217	0.866304	0.859247	0.927193		0.902745	0.833231
0.816074	0.84159	0.858105	0.631923	0.821358	0.785339		0.745183	0.816074
0.920665	0.788036	0.714831	0.794875	0.807496	0.789884		0.804644	0.920665
0.917596	0.752154	0.908638	0.910404	0.883626	0.918693		0.918326	0.917596
0.964128	0.790999	0.827403	0.788215	0.957046	0.951878		0.862644	0.964128
0.852866	0.786807	0.834676	0.900103	0.891112	0.805502		0.944167	0.852866
0.925569	0.905275	0.878197	0.619071	0.908173			0.871586	0.925569
0.846822	0.904135	0.918695	0.755808	0.754424			0.896741	0.846822
0.92453	0.680289	0.86938	0.752865	0.910033			0.909472	0.92453
0.811132	0.846937	0.88772	0.960579	0.853491			0.919969	0.811132
0.986431	0.74623	0.895277	0.777243	0.937527			0.844785	0.986431
0.905877	0.860911	0.820862	0.845647	0.786613			0.925137	0.905877
0.92557	0.726376	0.820553	0.766811	0.917686			0.887134	0.92557
0.906341	0.884178	0.821877	0.941323	0.84855			0.838586	0.906341
0.970955	0.776064	0.933858	0.6639	0.876901			0.967727	0.970955
0.88746	0.738007	0.747735	0.665629	0.656961			0.855277	0.88746
0.940119	0.756614	0.763168	0.777423	0.969509			0.842529	0.940119
0.917312	0.92025	0.889749	0.607795	0.902696			0.877408	0.917312
0.900712	0.75142	0.735798	0.632028	0.902589			0.88017	0.900712
0.95183	0.826564	0.871104	0.61178	0.882944			0.945255	0.95183
0.840538	0.600117	0.771977	0.727391	0.879789			0.746612	0.840538
0.972045	0.803034	0.982172	0.761527	0.939868			0.93334	0.972045
0.899787	0.869241	0.819695	0.799112	0.717632			0.8734	0.899787
0.948552	0.788089	0.813005	0.74487	0.890408			0.677637	0.948552
0.94277	0.836176	0.870251	0.848518	0.910216			0.768924	0.94277
0.920895	0.822873	0.812142	0.835119	0.755492			0.860701	0.920895
0.965672	0.90048	0.628672	0.634869	0.910756			0.878914	0.965672
0.875428	0.728112	0.917862	0.766511	0.910413			0.91494	0.875428
0.86694	0.814799	0.739063	0.824631	0.935446			0.845943	0.86694
0.896527	0.778263	0.690238	0.840471	0.836557			0.919034	0.896527
0.937619	0.87804	0.776957	0.807033	0.881341			0.960619	0.937619
0.894088	0.906995	0.75025	0.757528	0.897215			0.934402	0.894088
0.927208	0.947692	0.72126	0.803295	0.86578			0.897317	0.927208
0.837879	0.816182	0.756639	0.736594	0.88411			0.902915	0.837879
0.947998	0.955601	0.777914	0.844783	0.746103			0.87806	0.947998
0.856804	0.915468	0.728747	0.630298	0.809711			0.880756	0.856804
0.933579	0.703199	0.620537	0.727664	0.871783			0.805337	0.933579
0.93731	0.774194	0.758849	0.747689	0.90789			0.87453	0.93731
0.938424	0.773537	0.794319	0.733795	0.931913			0.942196	0.938424
0.875884	0.870914	0.774876	0.934184	0.857375			0.940775	0.875884
0.906569	0.897637	0.716877	0.86139	0.86638			0.858213	0.906569
0.923454	0.668887	0.652263	0.725957	0.952858			0.7444	0.923454
0.904237	0.917853	0.951745	0.929648	0.925212			0.90004	0.904237
0.924395	0.845075	0.78992	0.757582	0.737766			0.909443	0.924395
0.89637	0.926702	0.917475	0.770708	0.934377			0.930473	0.89637
0.841892	0.814509	0.841894	0.854364	0.888903			0.755987	0.841892
0.958633	0.870096	0.721249	0.670843	0.917436			0.906694	0.958633
0.925702	0.776622	0.688888	0.818787	0.842308			0.977652	0.925702
0.956866	0.96029	0.722146	0.772916	0.839466			0.968647	0.956866
0.914765	0.673339	0.60454	0.737937	0.926259			0.883844	0.914765
0.794187	0.865792	0.742984	0.636744	0.952099			0.862584	0.794187
0.925368	0.714844	0.606079	0.890382	0.850085			0.935107	0.925368
0.850163	0.815391	0.707375	0.888759	0.833254			0.860199	0.850163
0.882841	0.830365	0.864287	0.836607	0.864076			0.806056	0.882841
0.926403	0.825727	0.741284	0.863358	0.80412			0.881324	0.926403
0.901279	0.769509	0.663596	0.798779	0.530016			0.941728	0.901279
0.952418	0.770878	0.623444	0.841359	0.784251			0.948715	0.952418
0.843439	0.799016	0.831407	0.831509	0.855773			0.83861	0.843439
0.907038	0.94322	0.608638	0.777525	0.779994			0.949062	0.907038
0.950076	0.95574	0.724555	0.839954	0.843519			0.927277	0.950076
0.956982	0.950325	0.719803	0.732332	0.775659			0.838431	0.956982
0.853242	0.785934	0.717909	0.619918	0.916784			0.924596	0.853242
0.968008	0.933102	0.865566	0.660637	0.808923			0.912116	0.968008
0.970733	0.791581	0.657814	0.868608	0.9351			0.957184	0.970733
0.944369	0.651167	0.755046	0.73267	0.96992			0.87323	0.944369
0.95559	0.88201	0.706399	0.702652	0.753297			0.887571	0.95559
0.980474	0.842531	0.887306	0.675046	0.715993			0.841728	0.980474
0.714769	0.965865	0.780466	0.734715	0.87194			0.932155	0.714769
0.831585	0.772612	0.586647	0.937796	0.861101			0.733473	0.831585
0.858055	0.850817	0.752386	0.863338	0.897667			0.921236	0.858055
0.954773	0.831037	0.750685	0.703176	0.744035			0.853722	0.954773
0.971096	0.791971	0.734999	0.67254	0.754651			0.795043	0.971096
0.9118	0.676747	0.789238	0.837705	0.791596			0.825484	0.9118
0.964138	0.676976	0.782788	0.897228	0.944974			0.940654	0.964138
0.868255	0.705729	0.808521	0.768134	0.712731			0.898839	0.868255
0.945717	0.811147	0.868065	0.746662	0.806797			0.909329	0.945717
0.807894	0.84941	0.711036	0.819382	0.80692			0.899366	0.807894
0.835272	0.819383	0.608035	0.791574	0.750628			0.87026	0.835272
0.970145	0.949192	0.804492	0.857443	0.878312			0.899054	0.970145
0.960615	0.913321	0.649142	0.873813	0.7638			0.691254	0.960615
0.958018	0.922245	0.800705	0.930124	0.920436			0.933291	0.958018
0.921848	0.826181	0.755376	0.87299	0.855588			0.913811	0.921848
0.958368	0.969169	0.666756	0.877037	0.955319			0.706862	0.958368
0.969464	0.942758	0.815193	0.786609	0.921265			0.917533	0.969464
0.958591	0.726993	0.746415	0.912397	0.937474			0.868062	0.958591
0.821867	0.880478	0.621024	0.776598	0.944201			0.846354	0.821867
0.889735	0.683947	0.706642	0.803017	0.566683			0.782809	0.889735
0.89322	0.784208	0.645699	0.786078	0.85934			0.838817	0.89322
0.832338	0.88779	0.676912	0.706827	0.770399			0.735328	0.832338
0.870782	0.820993	0.697583	0.744967	0.825302			0.961989	0.870782
0.910166	0.903249	0.818027	0.682468	0.795758			0.828624	0.910166
0.84751	0.87759	0.6644	0.765556	0.945342			0.939501	0.84751
0.907119	0.719096	0.83105	0.65279	0.930202			0.668251	0.907119
0.94995	0.834491	0.88725	0.793144	0.964745			0.98037	0.94995
0.975272	0.854226	0.857825	0.890021	0.808065			0.838352	0.975272
0.971477	0.799132	0.764101	0.826994	0.923903			0.805287	0.971477
0.862206	0.947985	0.779872	0.812921	0.909626			0.851689	0.862206
0.964629	0.868526	0.81086	0.720801	0.704032			0.966662	0.964629
0.91559	0.848259	0.876932	0.795737	0.940919			0.853755	0.91559
0.943352	0.820109	0.768477	0.719858	0.744661			0.906048	0.943352
0.823268	0.593938	0.723545	0.698186	0.903643			0.793941	0.823268
0.973188	0.729875	0.912108	0.760069	0.873366			0.901643	0.973188
0.937427	0.888422	0.854293	0.780728	0.866837			0.683388	0.937427
0.860042	0.731328	0.79542	0.637311	0.925426			0.880328	0.860042
0.937627	0.633015	0.791683	0.827177	0.934891			0.869757	0.937627
0.924652	0.768275	0.831609	0.840481	0.900294			0.85872	0.924652
0.723304	0.91627	0.739507	0.663836	0.926631			0.979578	0.723304
0.926169	0.851334	0.688172	0.632709	0.915441			0.867651	0.926169
0.87959	0.812755	0.714933	0.802613	0.903894			0.921847	0.87959
0.955278	0.935811	0.860072	0.766006	0.899115			0.861604	0.955278
0.879793	0.916486	0.66268	0.760622	0.931327			0.802323	0.879793
0.939937	0.961144	0.752601	0.800829	0.955035			0.93834	0.939937
0.944812	0.769625	0.755223	0.932964	0.929946			0.928834	0.944812
0.782521	0.852147	0.822959	0.795283	0.90472			0.944659	0.782521
0.87253	0.92742	0.74576	0.910465	0.845494			0.943423	0.87253
0.972872	0.636527	0.765932	0.761555	0.901001			0.661913	0.972872
0.999521	0.626886	0.801586	0.789984	0.897073			0.853313	0.999521
0.843138	0.905496	0.881362	0.802437	0.792565			0.853519	0.843138
0.849009	0.655864	0.722558	0.846812	0.89403			0.952271	0.849009
0.840033	0.850631	0.682377	0.754935	0.925661			0.937312	0.840033
0.920342	0.879545	0.698914	0.72169	0.677579			0.911678	0.920342
0.9532	0.870573	0.825012	0.811332	0.826092			0.952205	0.9532
0.940339	0.979119	0.773208	0.684433	0.839209			0.78732	0.940339
0.937615	0.696932	0.817607	0.691712	0.952419			0.940832	0.937615
0.889823	0.589358	0.858889	0.703925	0.843504			0.916354	0.889823
0.906749	0.66834	0.763684	0.72326	0.891124			0.875283	0.906749
0.942576	0.800335	0.774994	0.738595	0.925271			0.964927	0.942576
0.822828	0.751245	0.785937	0.888431	0.899807			0.898373	0.822828
0.964559	0.765807	0.673599	0.702879	0.835432			0.865627	0.964559
0.874287	0.810715	0.682234	0.651697	0.680886			0.83281	0.874287
0.859439	0.752127	0.796569	0.949056	0.900837			0.95837	0.859439
0.891113	0.786081	0.826206	0.782686	0.875488			0.920267	0.891113
0.941434	0.829342	0.728666	0.73305	0.812118			0.93201	0.941434
0.911747	0.899346	0.800565	0.793756	0.920975			0.820421	0.911747
0.941459	0.901037	0.774881	0.831465	0.885403			0.791668	0.941459
0.925956	0.877291	0.70241	0.667851	0.664709			0.861535	0.925956
0.896705	0.783978	0.820533	0.860859	0.938628			0.908115	0.896705
0.937741	0.651562	0.692971	0.990327	0.817705			0.78814	0.937741
0.863968	0.728178	0.758432	0.68379	0.863874			0.94564	0.863968
0.927157	0.82361	0.6825	0.769446	0.827155			0.932308	0.927157
0.92578	0.547981	0.792312	0.672364	0.859509			0.959261	0.92578
0.855358	0.720941	0.625051	0.937469	0.901001			0.938837	0.855358
0.967894	0.956009	0.847179	0.708915	0.921282			0.93505	0.967894
0.920069	0.927467	0.905263	0.730636	0.903119			0.924149	0.920069
0.87546	0.827255	0.850552	0.730206	0.962496			0.937749	0.87546
0.89625	0.944847	0.77365	0.733754	0.941853			0.771341	0.89625
0.973392	0.880724	0.812658	0.821115	0.906945			0.737406	0.973392
0.96381	0.926217	0.77264	0.889023	0.9056			0.90568	0.96381
0.971374	0.683896	0.801525	0.664516	0.862909			0.827868	0.971374
0.906756	0.838752	0.754302	0.698196	0.939536			0.898708	0.906756
0.856245	0.902609	0.726552	0.797401	0.849271			0.841661	0.856245
0.905518	0.928678	0.676052	0.795846	0.939871			0.889394	0.905518
0.887695	0.835741	0.742077	0.716775	0.922458			0.949743	0.887695
0.954566	0.960016	0.744004	0.754989	0.751628			0.932616	0.954566
0.874766	0.62519	0.70482	0.738291	0.931238			0.909604	0.874766
0.743946	0.894965	0.773055	0.743769	0.665279			0.896163	0.743946
0.78688	0.831835	0.809226	0.829692	0.777966			0.788549	0.78688
0.966207	0.796227	0.751964	0.629338	0.770914			0.959286	0.966207
0.940125	0.781787	0.77831	0.805762	0.931325			0.904992	0.940125
0.981885	0.809296	0.70875	0.784619	0.90927			0.928986	0.981885
0.985	0.941166	0.779132	0.799177	0.934992			0.936703	0.985
0.903037	0.837544	0.706578	0.820991	0.896179			0.927987	0.903037
0.91308	0.908824	0.78409	0.801378	0.865823			0.868827	0.91308
0.912209	0.76847	0.747326	0.68546	0.845992			0.951825	0.912209
0.953766	0.898675	0.830188	0.674731	0.955348			0.903098	0.953766
0.868261	0.790207	0.889487	0.698332	0.839191			0.847077	0.868261
0.850969	0.971656	0.848239	0.753049	0.865579			0.943149	0.850969
0.911891	0.865733	0.736126	0.853256	0.942126			0.953189	0.911891
0.921235	0.832813	0.904012	0.892907	0.898089			0.985879	0.921235
0.826599	0.723228	0.757732	0.816087	0.893479			0.921312	0.826599
0.929192	0.840155	0.773657	0.882168	0.969882			0.925626	0.929192
0.539668	0.838037	0.796461	0.737787	0.922211			0.827852	0.539668
0.89056	0.854944	0.760384	0.903283	0.909472			0.807757	0.89056
0.831508	0.880329	0.810768	0.612552	0.850085			0.731668	0.831508
0.840471	0.653786	0.72598	0.792047	0.90801			0.933799	0.840471
0.928445	0.820545	0.76165	0.830145	0.901851			0.833058	0.928445
0.880699	0.981744	0.774817	0.930409	0.89651			0.949545	0.880699
0.953107	0.88519	0.781912	0.84478	0.868712			0.929254	0.953107
0.906563	0.782093	0.796002	0.735645	0.92162			0.819905	0.906563
0.926193	0.599441	0.755624	0.756062	0.910078			0.892102	0.926193
0.895085	0.711422	0.78172	0.90928	0.785532			0.833953	0.895085
0.949086	0.928876	0.761462	0.694651	0.900824			0.919316	0.949086
0.925626	0.985371	0.763152	0.783125	0.77036			0.91991	0.925626
0.915447	0.862913	0.791227	0.711254	0.815205			0.879612	0.915447
0.877211	0.956733	0.827189	0.912762	0.780562				0.877211
0.981908	0.966228	0.801701	0.728362	0.819723				0.981908
0.878902	0.852814	0.741738	0.912175	0.898803				0.878902
0.954547	0.777581	0.793935	0.908186	0.805465				0.954547
0.961579	0.698321	0.812085	0.883015	0.775487				0.961579
0.878434	0.723368	0.736491	0.71344	0.755835				0.878434
0.760176	0.938049	0.674755	0.75141	0.87525				0.760176
0.851614	0.897342	0.74949	0.710172	0.829963				0.851614
0.942973	0.860742	0.803041	0.795437	0.935009				0.942973
0.973237	0.709448	0.742837	0.615874	0.861328				0.973237
0.859053	0.881598	0.803148	0.760627	0.862909				0.859053
0.701852	0.859752	0.693507	0.753155	0.611636				0.701852
0.965774	0.877431	0.735627	0.8369	0.857271				0.965774
0.962953	0.908722	0.732547	0.685358	0.643003				0.962953
0.655607	0.799019	0.699248	0.788376	0.907678				0.655607
0.939782	0.833411	0.831549	0.682594	0.625501				0.939782
0.624665	0.844649	0.948237	0.870862	0.678578				0.624665
0.85714	0.966522	0.713993	0.688007	0.877167				0.85714
0.775552	0.936022	0.743629	0.788383	0.794016				0.775552
0.939557	0.801974	0.703048	0.854875	0.961413				0.939557
0.926145	0.802479	0.764687	0.596568	0.901576				0.926145
0.749191	0.856439	0.818503	0.782853	0.923206				0.749191
0.856052	0.517009	0.803836	0.700911	0.737117				0.856052
0.907917	0.92338	0.814535	0.82685	0.867946				0.907917
0.869221	0.92988	0.860942	0.912427	0.893649				0.869221
0.953049	0.831108	0.737272	0.716758	0.927584				0.953049
0.963158	0.744459	0.630058	0.861524	0.855711				0.963158
0.813453	0.830522	0.816517	0.740712	0.896711				0.813453
0.864299	0.818356	0.780053	0.812364	0.765677				0.864299
0.94613	0.805508	0.804811	0.846185	0.924547				0.94613
0.90254	0.742579	0.784716	0.707154	0.940088				0.90254
0.956454	0.890338	0.712081	0.657701	0.888053				0.956454
0.955878	0.925511	0.723703	0.63587	0.818371				0.955878
0.964863	0.903581	0.657976	0.66578	0.892653				0.964863
0.932793	0.904528	0.672969	0.720046	0.776582				0.932793
0.781911	0.747063	0.679092	0.801322	0.675928				0.781911
0.913046	0.839384	0.742285	0.746158	0.940293				0.913046
0.857933	0.746526	0.748945	0.683616	0.824776				0.857933
0.937836	0.781411	0.803765	0.707139	0.930331				0.937836
0.881756	0.627735	0.725024	0.7738	0.818577				0.881756
0.875129	0.828245	0.6951	0.787187	0.788165				0.875129
0.96319	0.786055	0.750334	0.812848	0.932341				0.96319
0.879449	0.668671	0.673217	0.744542	0.844535				0.879449
0.913275	0.841271	0.812447	0.817873	0.78134				0.913275
0.951298	0.86427	0.743727	0.774362	0.940585				0.951298
0.872709	0.63985	0.790391	0.793867	0.960784				0.872709
0.974095	0.69245	0.883733	0.638937	0.848147				0.974095
0.908359	0.910182	0.776789	0.682937	0.763543				0.908359
0.906085	0.930887	0.679079	0.796935	0.8785				0.906085
0.966124	0.836256	0.856864	0.833055	0.871245				0.966124
0.893043	0.936253	0.803182	0.877524	0.927714				0.893043
0.895785	0.907957	0.664651	0.735796	0.958181				0.895785
0.806059	0.956036	0.730754	0.862116	0.867456				0.806059
0.973282	0.749388	0.827561	0.886603	0.908374				0.973282
0.965669	0.91003	0.761275	0.783367	0.90094				0.965669
0.911705	0.963896	0.770518	0.70049	0.897993				0.911705
0.903129	0.962416	0.829727	0.7281	0.892834				0.903129
0.944204	0.93821	0.839051	0.85298	0.734392				0.944204
0.960328	0.814547	0.829061	0.767281	0.940511				0.960328
0.780725	0.85856	0.800015	0.91566	0.948827				0.780725
0.767716	0.816092	0.742331	0.813721	0.8704				0.767716
0.915775	0.646286	0.661505	0.917946	0.722887				0.915775
0.952949	0.87562	0.785277	0.903046	0.819676				0.952949
0.942934	0.685919	0.785331	0.857589	0.90928				0.942934
0.901678	0.810289	0.756973	0.870693	0.889072				0.901678
0.953878	0.800458	0.654762	0.929943	0.930412				0.953878
0.959874	0.971542	0.669691	0.750212	0.747097				0.959874
0.763932	0.848443	0.815003	0.817533	0.952155				0.763932
0.910012	0.915041	0.846068	0.758293	0.830705				0.910012
0.941191	0.892582	0.794379	0.714393	0.887505				0.941191
0.920013	0.958299	0.747289	0.786374	0.933604				0.920013
0.906703	0.949336	0.941667	0.774522	0.867321				0.906703
0.864758	0.957708	0.854673	0.676405	0.881329				0.864758
0.907283	0.881484	0.8091	0.90789	0.911769				0.907283
0.827676	0.681866	0.666592	0.795352	0.896092				0.827676
0.929488	0.952698	0.668224	0.93237	0.882286				0.929488
0.906622	0.813899	0.860999	0.903715	0.864817				0.906622
0.965626	0.874666	0.758399	0.58023	0.861083				0.965626
0.887116	0.767005	0.706597	0.852063	0.887021				0.887116
0.861276	0.884086	0.887964	0.969253	0.860636				0.861276
0.900479	0.843472	0.812185	0.551221	0.872062				0.900479
0.811256	0.873447	0.705997	0.896012	0.722745				0.811256
0.820117	0.841355	0.832636	0.720967	0.880008				0.820117
0.808051	0.88334	0.717184	0.837959	0.840462				0.808051
0.958005	0.897337	0.802779	0.676994	0.770893				0.958005
0.947197	0.795682	0.834911	0.860658	0.91622				0.947197
0.89	0.997105	0.683577	0.738665	0.859116				0.89
0.966763	0.978555	0.734937	0.933921	0.876631				0.966763
0.936678	0.915419	0.664449	0.800762	0.964728				0.936678
0.930596	0.753685	0.720049	0.66331	0.802228				0.930596
0.891673	0.722918	0.854911	0.796154	0.845539				0.891673
0.942968	0.977692	0.823424	0.747966	0.928067				0.942968
0.898481	0.921984	0.620138	0.78757	0.953047				0.898481
0.841051	0.885395	0.653794	0.773066	0.962278				0.841051
0.858668	0.654793	0.725549	0.891967	0.825542				0.858668
0.940618	0.958063	0.838336	0.844767	0.843001				0.940618
0.9029	0.94551	0.730869	0.668396	0.786331				0.9029
0.821362	0.739389	0.747866	0.8449	0.940551				0.821362
0.797883	0.551408	0.861734	0.677474	0.900594				0.797883
0.930591	0.913245	0.852226	0.716959	0.920432				0.930591
0.943405	0.962869	0.905147	0.708641	0.918178				0.943405
0.852895	0.885922	0.824028	0.67799	0.837288				0.852895
0.955913	0.873494	0.883281	0.7059	0.670202				0.955913
0.90484	0.833513	0.799403	0.844017	0.890111				0.90484
0.883947	0.975273	0.81021	0.766575	0.786475				0.883947
0.843927	0.938921	0.772542	0.758127	0.732174				0.843927
0.894039	0.759791	0.778413	0.623339	0.860102				0.894039
0.858814	0.756766	0.763128	0.725587	0.899872				0.858814
0.952533	0.79302	0.863429	0.789826	0.886814				0.952533
0.84108	0.762683	0.697619	0.83445	0.916814				0.84108
0.954329	0.565699	0.850763	0.671026	0.914329				0.954329
0.922714	0.920181	0.728158	0.794835	0.889714				0.922714
0.765154	0.908236	0.820359	0.790569	0.945609				0.765154
0.910839	0.90357	0.704984	0.891169	0.897442				0.910839
0.799938	0.824104	0.707975	0.820552	0.744331				0.799938
0.938736	0.763896	0.702965	0.847067	0.593641				0.938736
0.975119	0.813355	0.777699	0.801897	0.821821				0.975119
0.925869	0.837897	0.750476	0.739762	0.944133				0.925869
0.730749	0.91248	0.693799	0.861019	0.881399				0.730749
0.83976	0.78593	0.867065	0.624726	0.891233				0.83976
0.918227	0.788383	0.761617	0.652661	0.782186				0.918227
0.915763	0.790474	0.868282	0.694175	0.878861				0.915763
0.937777	0.811913	0.826381	0.839159	0.864247				0.937777
0.88542	0.759048	0.805898	0.748728	0.864671				0.88542
0.81484	0.722916	0.694749	0.693833	0.906635				0.81484
0.825302	0.845169	0.80034	0.758195	0.954192				0.825302
0.968759	0.968403	0.868579	0.891354	0.966928				0.968759
0.950347	0.748126	0.770427	0.766692	0.901568				0.950347
0.907336	0.822382	0.925885	0.567678	0.713934				0.907336
0.819885	0.901849	0.901193	0.743267	0.889195				0.819885
0.908762	0.889759	0.800233	0.705674	0.896456				0.908762
0.852208	0.916395	0.857846	0.747642	0.907081				0.852208
0.858636	0.788167	0.889585	0.751772	0.8742				0.858636
0.906462	0.945772	0.869431	0.820588	0.752068				0.906462
0.903493	0.88064	0.889853	0.909236	0.916878				0.903493
0.944351	0.946277	0.705213	0.871544	0.906672				0.944351
0.949773	0.952814	0.829481	0.813753	0.907292				0.949773
0.966028	0.921531	0.899851	0.824572	0.923168				0.966028
0.865633	0.885392	0.933076	0.824528	0.939987				0.865633
0.831748	0.966886	0.764777	0.877781	0.889772				0.831748
0.80666	0.867483	0.682127	0.941102	0.731587				0.80666
0.754632	0.861114	0.939423	0.752249	0.830889				0.754632
0.806853	0.842877	0.854371	0.796828	0.551132				0.806853
0.812599	0.849096	0.685229	0.651808	0.812335				0.812599
0.958892	0.687719	0.789854	0.727198	0.911412				0.958892
0.884145	0.823743	0.884314	0.931583	0.840353				0.884145
0.919293	0.860322	0.885912	0.820009	0.817663				0.919293
0.832374	0.892754	0.820123	0.829608	0.878037				0.832374
0.975646	0.886443	0.81805	0.848051	0.894882				0.975646
0.801751	0.69089	0.929466	0.700541	0.764439				0.801751
0.947104	0.659676	0.875204	0.64516	0.936078				0.947104
0.861439	0.893458	0.800619	0.808931	0.940005				0.861439
0.937412	0.865636	0.877146	0.895171	0.732902				0.937412
0.968058	0.888187	0.756079	0.778354	0.66115				0.968058
0.953068	0.787736	0.828169	0.862965	0.796032				0.953068
0.841601	0.717825	0.732273	0.90414	0.955303				0.841601
0.858061	0.756534	0.833913	0.74461	0.81329				0.858061
0.935748	0.915075	0.770709	0.811611	0.729054				0.935748
0.836661	0.939676	0.864792	0.711468	0.950288				0.836661
0.929554	0.677726	0.897084	0.847576	0.872039				0.929554
0.96833	0.963441	0.916394	0.763754	0.882374				0.96833
0.951237	0.689852	0.77604	0.745972	0.923029				0.951237
0.95514	0.75925	0.782193	0.813503	0.909761				0.95514
0.9222	0.738996	0.88585	0.778519	0.795329				0.9222
0.935546	0.843554	0.923917	0.75489	0.891124				0.935546
0.952907	0.816409	0.776969	0.866252	0.86135				0.952907
0.919703	0.840804	0.826527	0.803816	0.87338				0.919703
0.847546	0.843	0.875576	0.901578	0.836418				0.847546
0.94171	0.848326	0.774563	0.942037	0.934061				0.94171
0.831016	0.899101	0.896236	0.801646	0.821586				0.831016
0.962489	0.844887	0.845099	0.82812	0.6602				0.962489
0.654652	0.848359	0.749308	0.765579	0.699964				0.654652
0.781	0.927545	0.845832	0.812266	0.914988				0.781
0.924327	0.864995	0.843457	0.833889	0.822099				0.924327
0.837676	0.734027	0.94587	0.82861	0.7787				0.837676
0.754221	0.936639	0.87845	0.890787	0.898519				0.754221
0.843071	0.723169	0.832907	0.668139	0.955202				0.843071
0.880962	0.783528	0.83036	0.910947	0.848487				0.880962
0.945933	0.897677	0.822949	0.786631	0.930671				0.945933
0.864848	0.855981	0.796694	0.849546	0.87063				0.864848
0.729958	0.852547	0.74516	0.583482	0.855072				0.729958
0.958243	0.963192	0.718688	0.721603	0.872815				0.958243
0.970149	0.850845	0.854358	0.748579	0.779297				0.970149
0.843361	0.944266	0.640928	0.618372	0.964783				0.843361
0.843793	0.808529	0.800479	0.780216	0.936498				0.843793
0.753532	0.879963	0.906139	0.796677	0.936865				0.753532
0.945886	0.793396	0.789414	0.801087	0.722582				0.945886
0.954814	0.883224	0.943917	0.709903	0.898024				0.954814
0.888452	0.808073	0.870373	0.901242	0.630114				0.888452
0.853191	0.703433	0.892252	0.853373	0.851075				0.853191
0.762547	0.647618	0.857221	0.656676	0.906987				0.762547
0.819659	0.606754	0.850184	0.649725	0.80251				0.819659
0.936417	0.744956	0.84007	0.680263	0.880857				0.936417
0.981465	0.855526	0.8284	0.770548	0.871728				0.981465
0.913671	0.766645	0.604309	0.840121	0.951607				0.913671
0.924342	0.765445	0.819212	0.757243	0.92496				0.924342
0.759634	0.930486	0.683185	0.861982	0.833321				0.759634
0.964414	0.858312	0.686894	0.728847	0.838424				0.964414
0.926554	0.954594	0.793237	0.730207	0.886808				0.926554
0.878124	0.854667	0.857555	0.805613	0.891994				0.878124
0.971577	0.707839	0.765642	0.837775	0.823994				0.971577
0.917865	0.833551	0.903421	0.806913	0.884538				0.917865
0.945538	0.810426	0.872973	0.75354	0.943575				0.945538
0.845233	0.881025	0.851183	0.681237	0.944241				0.845233
0.733892	0.769609	0.829079	0.725557	0.911869				0.733892
0.975372	0.545461	0.897584	0.854547	0.893014				0.975372
0.889926	0.787097	0.817523	0.859808	0.693845				0.889926
0.943188	0.952941	0.904443	0.919085	0.827264				0.943188
0.979208	0.67129	0.873669	0.684769	0.8891				0.979208
0.921076	0.910227	0.821402	0.873556	0.673297				0.921076
0.823818	0.802609	0.965282	0.596635	0.895011				0.823818
0.940054	0.758509	0.877688	0.861126	0.856095				0.940054
0.964423	0.808794	0.69809	0.888293	0.886055				0.964423
0.898942	0.67988	0.849501	0.786163	0.935661				0.898942
0.790569	0.908239	0.877968	0.696234	0.960899				0.790569
0.902948	0.899536	0.736916	0.925164	0.858901				0.902948
0.948915	0.908043	0.909358	0.84111	0.888557				0.948915
0.893053	0.659086	0.856783	0.80886	0.83839				0.893053
0.947084	0.90501	0.580998	0.749028	0.931199				0.947084
0.961968	0.656118	0.826127	0.740063	0.89983				0.961968
0.797725	0.882986	0.61922	0.830439	0.924203				0.797725
0.957074	0.684262	0.712103	0.745137	0.961501				0.957074
0.924531	0.899075	0.698353	0.859804	0.943747				0.924531
0.897017	0.762134	0.812268	0.718218	0.846055				0.897017
0.96369	0.74884	0.666979	0.926041	0.879124				0.96369
0.95207	0.776057	0.806487	0.9503	0.812469				0.95207
0.951032	0.746123	0.634333	0.931198	0.870541				0.951032
0.891579	0.861831	0.856636	0.833512	0.935442				0.891579
0.902681	0.901819	0.824997	0.861129	0.644745				0.902681
0.837349	0.937833	0.842853	0.916638	0.917934				0.837349
0.908911	0.818035	0.871367	0.925122	0.945422				0.908911
0.952932	0.768055	0.935953	0.866167	0.926111				0.952932
0.903282	0.72322	0.880392	0.911091	0.864517				0.903282
0.744939	0.687141	0.858802	0.820289	0.898099				0.744939
0.761921	0.707113	0.786601	0.887885	0.827264				0.761921
0.88561	0.848756	0.897408	0.770082	0.919862				0.88561
0.966346	0.812321	0.656464	0.868078	0.916647				0.966346
0.779936	0.796637	0.806123	0.719807	0.871506				0.779936
0.787164	0.937223	0.857585	0.672821	0.922569				0.787164
0.88394	0.698675	0.853141	0.848073	0.915465				0.88394
0.841085	0.741436	0.801175	0.86053	0.880317				0.841085
0.950997	0.81152	0.792354	0.668947	0.842571				0.950997
0.926339	0.720546	0.723062	0.777251	0.864378				0.926339
0.900903	0.864824	0.829985	0.919405	0.921686				0.900903
0.903136	0.886062	0.816844	0.753369	0.886949				0.903136
0.963199	0.794267	0.820493	0.804169	0.930075				0.963199
0.948507	0.851362	0.875442	0.879441	0.898828				0.948507
0.927192	0.971813	0.812434	0.777725	0.669655				0.927192
0.968508	0.80421	0.890907	0.790441	0.824602				0.968508
0.954129	0.9534	0.855098	0.89483	0.782628				0.954129
0.900106	0.966168	0.806335	0.812599	0.913703				0.900106
0.938488	0.947721	0.804912	0.73158	0.959093				0.938488
0.892639	0.884967	0.819412	0.835306	0.898024				0.892639
0.920279	0.746186	0.804903	0.714777	0.801606				0.920279
0.87558	0.851962	0.876594	0.75127	0.925002				0.87558
0.937636	0.93815	0.738199	0.720901	0.91694				0.937636
0.966076	0.923014	0.73551	0.840328	0.920084				0.966076
0.888182	0.795362	0.860158	0.886531	0.956314				0.888182
0.910387	0.774439	0.743708	0.914616	0.826208				0.910387
0.939723	0.921835	0.837458	0.742574	0.790808				0.939723
0.962715	0.817072	0.808233	0.75212	0.95613				0.962715
0.922284	0.851286	0.813224	0.763621	0.911216				0.922284
0.976679	0.811489	0.715543	0.679202	0.86908				0.976679
0.810907	0.909792	0.781134	0.958952	0.783181				0.810907
0.963295	0.64379	0.63939	0.817744	0.941587				0.963295
0.899954	0.934751	0.812504	0.862018	0.923601				0.899954
0.915954	0.788443	0.940146	0.92671	0.951934				0.915954
0.94225	0.718503	0.827808	0.751393	0.91857				0.94225
0.92808	0.774068	0.888788	0.882607	0.837783				0.92808
0.89135	0.804651	0.830537	0.844632	0.836411				0.89135
0.920408	0.517031	0.893352	0.821217	0.951747				0.920408
0.886273	0.837317	0.83133	0.933344	0.888562				0.886273
0.835574	0.919281	0.833939	0.927908	0.626377				0.835574
0.856216	0.884304	0.820639	0.792695	0.872386				0.856216
0.839019	0.836348	0.792854	0.901419	0.920538				0.839019
0.841392	0.909853	0.764261	0.794617	0.91735				0.841392
0.841424	0.754107	0.808897	0.739607	0.86706				0.841424
0.871307	0.396979	0.756937	0.642894	0.926755				0.871307
0.88094	0.966963	0.831845	0.728305	0.671501				0.88094
0.817574	0.884572	0.898288	0.875373	0.951278				0.817574
0.865281	0.813339	0.83955	0.789227	0.792441				0.865281
0.921564	0.911274	0.859742	0.557289	0.937565				0.921564
0.829259	0.697909	0.878107	0.932681	0.719788				0.829259
0.949528	0.818733	0.868576	0.674892	0.901204				0.949528
0.808401	0.823215	0.786091	0.868321	0.842735				0.808401
0.931738	0.837526	0.84434	0.884518	0.950124				0.931738
0.743822	0.96039	0.914426	0.881696	0.917353				0.743822
0.906867	0.982405	0.710236	0.891668	0.756701				0.906867
0.969113	0.841861	0.725628	0.738335	0.801493				0.969113
0.92839	0.84208	0.890255	0.696505	0.897621				0.92839
0.810228	0.769752	0.834305	0.838905	0.905892				0.810228
0.944337	0.819797	0.896622	0.785142	0.909016				0.944337
0.876688	0.888881	0.904196	0.71969	0.84338				0.876688
0.930524	0.920462	0.810156	0.899183	0.921574				0.930524
0.916263	0.728689	0.748536	0.96105	0.807854				0.916263
0.966714	0.77593	0.819816	0.806628	0.891573				0.966714
0.863943	0.886891	0.644486	0.768495	0.876103				0.863943
0.963696	0.868351	0.833737	0.72206	0.906635				0.963696
0.886122	0.94042	0.841624	0.831537	0.88825				0.886122
0.952143	0.934183	0.798331	0.906154	0.848925				0.952143
0.954291	0.613497	0.802862	0.715227	0.790426				0.954291
0.915644	0.70138	0.958483	0.740549	0.672344				0.915644
0.905513	0.847158	0.874349	0.71765	0.722974				0.905513
0.950095	0.880412	0.952991	0.80526	0.835933				0.950095
0.89829	0.735342	0.832129	0.880972	0.778269				0.89829
0.965909	0.840755	0.735589	0.87988	0.920314				0.965909
0.884047	0.918572	0.857535	0.736222	0.732998				0.884047
0.931187	0.872004	0.691036	0.735144	0.599084				0.931187
0.832118	0.850211	0.764903	0.793973	0.837223				0.832118
0.892039	0.796862	0.810976	0.709916	0.763062				0.892039
0.875586	0.925128	0.808015	0.717764	0.893823				0.875586
0.951539	0.946104	0.738283	0.95349	0.739835				0.951539
0.961614	0.959101	0.814618	0.680731	0.769754				0.961614
0.933189	0.928523	0.692755	0.82462	0.894903				0.933189
0.94501	0.82424	0.841625	0.871876	0.948307				0.94501
0.954653	0.842326	0.7805	0.781139	0.804674				0.954653
0.891373	0.722828	0.72466	0.733113	0.655753				0.891373
0.793532	0.884161	0.858419	0.891922	0.828007				0.793532
0.837018	0.806627	0.794566	0.827004	0.932357				0.837018
0.797481	0.880235	0.780912	0.81313	0.92188				0.797481
0.973673	0.703946	0.748417	0.659237	0.961				0.973673
0.90263	0.8614	0.799518	0.810989	0.962106				0.90263
0.941606	0.732325	0.775782	0.766201	0.860122				0.941606
0.828819	0.75054	0.799019	0.810058	0.756494				0.828819
0.920987	0.730725	0.811872	0.812406	0.926268				0.920987
0.781287	0.964101	0.768844	0.825097	0.833728				0.781287
0.899757	0.588322	0.753331	0.813891	0.938529				0.899757
0.983502	0.953787	0.841641	0.892271	0.884418				0.983502
0.849423	0.830211	0.767995	0.767566	0.858795				0.849423
0.791628	0.824126	0.788824	0.711677	0.77592				0.791628
0.976358	0.634081	0.861878	0.860782	0.764178				0.976358
0.880543	0.923194	0.73099	0.70619	0.734314				0.880543
0.749007	0.79737	0.809534	0.923709	0.802631				0.749007
0.817392	0.894774	0.878854	0.756438	0.752039				0.817392
0.869855	0.705474	0.787796	0.697791	0.83902				0.869855
0.95163	0.701794	0.7161	0.658684	0.853167				0.95163
0.894124	0.861729	0.793974	0.810507	0.784697				0.894124
0.909605	0.909726	0.882516	0.709052	0.788718				0.909605
0.96835	0.82131	0.863792	0.771026	0.939927				0.96835
0.93521	0.928412	0.897436	0.893836	0.918177				0.93521
0.879109	0.675722	0.697098	0.831358	0.878609				0.879109
0.743252	0.961028	0.781899	0.940892	0.794581				0.743252
0.884904	0.882022	0.760751	0.813235	0.832946				0.884904
0.958219	0.938394	0.894623	0.798258	0.926717				0.958219
0.96757	0.763137	0.893154	0.859193	0.91842				0.96757
0.961725	0.667803	0.810839	0.773644	0.91421				0.961725
0.842043	0.619049	0.840877	0.825285	0.91372				0.842043
0.895133	0.713908	0.873484	0.789382	0.755364				0.895133
0.881882	0.890257	0.882022	0.894901	0.907549				0.881882
0.925875	0.819164	0.879019	0.777877	0.776893				0.925875
0.966938	0.754498	0.745257	0.819181	0.816777				0.966938
0.870899	0.770253	0.792357	0.9167	0.932656				0.870899
0.825917	0.843976	0.848786	0.766593	0.86766				0.825917
0.912046	0.703785	0.735702	0.769226	0.831955				0.912046
0.93141	0.679288	0.79312	0.676653	0.916263				0.93141
0.80682	0.928502	0.810748	0.605345	0.848901				0.80682
0.888782	0.809425	0.944939	0.767765	0.848543				0.888782
0.840836	0.850705	0.80455	0.630449	0.899841				0.840836
0.798152	0.89957	0.700051	0.817191	0.880025				0.798152
0.853463	0.735749	0.839201	0.865086	0.927188				0.853463
0.972794	0.978775	0.823061	0.678167	0.942516				0.972794
0.980102		0.763784	0.884125	0.831266				0.980102
0.91939		0.814262	0.79859	0.878289				0.91939
0.881597		0.88162	0.822208	0.913955				0.881597
0.919772		0.726096	0.928006	0.828789				0.919772
0.975077		0.676414	0.821289	0.826517				0.975077
0.847663		0.779505	0.837286	0.919256				0.847663
0.823545		0.703791	0.928784	0.852147				0.823545
0.783663		0.833029	0.718008	0.893119				0.783663
0.882774		0.757216	0.804995	0.803812				0.882774
0.870877		0.884656	0.754733	0.880946				0.870877
0.955954		0.845714	0.683178	0.711081				0.955954
0.84884		0.741526	0.811861	0.861285				0.84884
0.891314		0.861931	0.776099	0.897635				0.891314
0.764448		0.762502	0.731419	0.810598				0.764448
0.867967		0.824509	0.696238	0.939846				0.867967
0.924937		0.697653	0.851348	0.773852				0.924937
0.913947		0.768287	0.81373	0.810596				0.913947
0.953678		0.797584	0.899614	0.853839				0.953678
0.934141		0.722512	0.944663	0.874368				0.934141
0.927774		0.86112	0.715802	0.82954				0.927774
0.866998		0.790133	0.754605	0.900846				0.866998
0.8132		0.840518	0.622288	0.80029				0.8132
0.683773		0.792904	0.783264	0.790711				0.683773
0.964174		0.783944	0.93793	0.911485				0.964174
0.902088		0.692986	0.887555	0.947469				0.902088
0.896589		0.771517	0.853674	0.938927				0.896589
0.920092		0.823349	0.852796	0.84536				0.920092
0.976464		0.71828	0.809597	0.833281				0.976464
0.983488		0.795325	0.926349	0.935537				0.983488
0.871254		0.820331	0.785172	0.823697				0.871254
0.776035		0.738429	0.841894	0.959253				0.776035
0.978253		0.692537	0.777813	0.940017				0.978253
0.840102		0.791375	0.693722	0.88281				0.840102
0.971093		0.780169	0.717591	0.820532				0.971093
0.850278		0.705125	0.757124	0.835575				0.850278
0.777638		0.913397	0.82379	0.926246				0.777638
0.944534		0.767352	0.819901	0.685641				0.944534
0.960122		0.731721	0.849763	0.882752				0.960122
0.902598		0.741914	0.863463	0.927504				0.902598
0.934182		0.733581	0.649348	0.853765				0.934182
0.82192		0.627799	0.807094	0.864373				0.82192
0.967263		0.814908	0.813349	0.912775				0.967263
0.894551		0.712079	0.78418	0.956793				0.894551
0.839968		0.670119	0.772686	0.7997				0.839968
0.766276		0.738333	0.919019	0.872447				0.766276
0.891118		0.947423	0.873263	0.849992				0.891118
0.894001		0.715121	0.691476	0.936483				0.894001
0.865294		0.701335	0.858512	0.80693				0.865294
0.965954		0.784044	0.740981	0.953262				0.965954
0.967547		0.722853	0.631475	0.961982				0.967547
0.858084		0.700592	0.930737	0.900704				0.858084
0.872463		0.71106	0.599089	0.632788				0.872463
0.910612		0.836321	0.84907	0.90635				0.910612
0.94229		0.788601	0.866919	0.933167				0.94229
0.973655		0.759414	0.967029	0.942934				0.973655
0.953576		0.753106	0.621535	0.949226				0.953576
0.951257		0.919177	0.859536	0.890303				0.951257
0.946392		0.676494	0.764504	0.923947				0.946392
0.940041		0.757484	0.834652	0.970136				0.940041
0.96249		0.756156	0.90336	0.928855				0.96249
0.922852		0.831488	0.790914	0.825459				0.922852
0.964156		0.724145	0.94496	0.906027				0.964156
0.976682		0.83554	0.83632	0.791093				0.976682
0.883044		0.85393	0.897682	0.936705				0.883044
0.947268		0.845917	0.657877	0.96077				0.947268
0.892547		0.767801	0.548086	0.832587				0.892547
0.954747		0.73304	0.803444	0.833321				0.954747
0.966065		0.691846	0.736309	0.781978				0.966065
0.963869		0.778805	0.868516	0.909646				0.963869
0.776472		0.616778	0.837798	0.859878				0.776472
0.864131		0.775624	0.762445	0.883409				0.864131
0.85495		0.785884	0.562741	0.955461				0.85495
0.952259		0.746962	0.679053	0.938524				0.952259
0.797222		0.912044	0.780954	0.959606				0.797222
0.876656		0.793139	0.767441	0.852843				0.876656
0.936993		0.734058	0.775009	0.857088				0.936993
0.745482		0.677737	0.799826	0.898594				0.745482
0.914681		0.882692	0.918787	0.806067				0.914681
0.881779		0.803645	0.866748	0.79161				0.881779
0.943752		0.839156	0.919198	0.935642				0.943752
0.842506		0.656851	0.929447	0.780962				0.842506
0.860412		0.624689	0.888788	0.902031				0.860412
0.874997		0.775308	0.701338	0.899747				0.874997
0.895645		0.826097	0.720475	0.770081				0.895645
0.861139		0.766958	0.860486	0.77577				0.861139
0.932908		0.768455	0.960695	0.855534				0.932908
0.89754		0.832115	0.90789	0.905507				0.89754
0.882963		0.766011	0.810138	0.946982				0.882963
0.941551		0.702524	0.642192	0.903242				0.941551
0.950675		0.857818	0.811202	0.913187				0.950675
0.840847		0.883445	0.564887	0.918414				0.840847
0.856633		0.708409	0.763143	0.853683				0.856633
0.520125		0.785294	0.705082	0.840689				0.520125
0.959024		0.765369	0.7499	0.953084				0.959024
0.96609		0.745463	0.802496	0.765405				0.96609
0.933722		0.726535	0.811112	0.915216				0.933722
0.970443		0.777475	0.81937	0.824737				0.970443
0.823449		0.681844	0.730475	0.863201				0.823449
0.870447		0.814746	0.874395	0.927264				0.870447
0.931614		0.86701	0.856554	0.918376				0.931614
0.82784		0.884781	0.726864	0.795684				0.82784
0.944647		0.868142	0.749306	0.960696				0.944647
0.977024		0.760449	0.792911	0.607706				0.977024
0.870128		0.779742	0.886991	0.939629				0.870128
0.909957		0.634432	0.910174	0.839804				0.909957
0.959562		0.782346	0.836623	0.921266				0.959562
0.868475		0.786893	0.794091	0.862833				0.868475
0.913747		0.858402	0.772543	0.894316				0.913747
0.932473		0.701234	0.875382	0.708229				0.932473
0.898882		0.914735	0.841756	0.918735				0.898882
0.651861		0.7378	0.756637	0.954421				0.651861
0.732571		0.90252	0.780153	0.844345				0.732571
0.91782		0.830685	0.699258	0.751486				0.91782
0.917465		0.872937	0.774734	0.910543				0.917465
0.884841		0.824438	0.720642	0.940818				0.884841
0.940808		0.833192	0.657797	0.85176				0.940808
0.831411		0.909492	0.803041	0.856095				0.831411
0.954945		0.872144	0.61392	0.936671				0.954945
0.761735		0.724537	0.687649	0.88573				0.761735
0.810941		0.91592	0.608276	0.893558				0.810941
0.922302		0.918893	0.943508	0.918156				0.922302
0.971088		0.844264	0.657484	0.897323				0.971088
0.935402		0.724534	0.837303	0.957037				0.935402
0.860283		0.749808	0.866396	0.939697				0.860283
0.927506		0.651637	0.812524	0.718852				0.927506
0.869202		0.646893	0.721009	0.823439				0.869202
0.982365		0.88112	0.754329	0.750736				0.982365
0.859734		0.669168	0.740597	0.750068				0.859734
0.968719		0.736523	0.603838	0.958917				0.968719
0.967581		0.899693	0.801977	0.918571				0.967581
0.863497		0.855244	0.740663	0.698017				0.863497
0.82091		0.789361	0.764409	0.950772				0.82091
0.919289		0.738458	0.668841	0.943133				0.919289
0.952085		0.800795	0.686303	0.907214				0.952085
0.918346		0.785694	0.783759	0.906974				0.918346
0.869809		0.904832	0.786472	0.910361				0.869809
0.880098		0.833384	0.730359	0.929713				0.880098
0.958308		0.749272	0.554539	0.854485				0.958308
0.919931		0.835953	0.853825	0.95893				0.919931
0.962388		0.883116	0.930727	0.888435				0.962388
0.812352		0.876148	0.838089	0.712088				0.812352
0.882464		0.649525	0.880751	0.845009				0.882464
0.975622		0.850532	0.737691	0.869099				0.975622
0.710833		0.870147	0.852256	0.877425				0.710833
0.938943		0.674852	0.685309	0.942475				0.938943
0.962076		0.768367	0.700166	0.930911				0.962076
0.904177		0.734393	0.600773	0.671484				0.904177
0.852292		0.844593	0.764632	0.967559				0.852292
0.976534		0.821644	0.725147	0.909456				0.976534
0.941181		0.781301	0.797287	0.882411				0.941181
0.954856		0.806813	0.737403	0.950254				0.954856
0.932779		0.712168	0.890649	0.890043				0.932779
0.824508		0.804799	0.886492	0.688994				0.824508
0.905337		0.761857	0.719054	0.876769				0.905337
0.95507		0.797717	0.76573	0.960946				0.95507
0.898389		0.73795	0.601965	0.91743				0.898389
0.919926		0.823032	0.781707	0.91611				0.919926
0.754274		0.811798	0.790077	0.889949				0.754274
0.960159		0.736468	0.66533	0.931482				0.960159
0.922026		0.692084	0.893632	0.864912				0.922026
0.918773		0.830669	0.96019	0.8866				0.918773
0.974969		0.800073	0.7365	0.845652				0.974969
0.968718		0.631285	0.778618	0.887137				0.968718
0.857284		0.767979	0.572154	0.849925				0.857284
0.939712		0.752973	0.872723	0.851831				0.939712
0.921029		0.87422	0.750097	0.822913				0.921029
0.951967		0.816916	0.701504	0.85758				0.951967
0.943181		0.783314	0.723157	0.938478				0.943181
0.923993		0.845931	0.915079	0.829908				0.923993
0.89364		0.780057	0.937794	0.910087				0.89364
0.855447		0.771704	0.765902	0.831949				0.855447
0.924402		0.80484	0.852406	0.85592				0.924402
0.891305		0.771369	0.850865	0.90733				0.891305
0.969084		0.920616	0.776595	0.661635				0.969084
0.940166		0.776132	0.670971	0.699771				0.940166
0.931653		0.779787	0.654868	0.794073				0.931653
0.919162		0.799142	0.843031	0.73218				0.919162
0.95746		0.704382	0.83484	0.792158				0.95746
0.906471		0.80787	0.781609	0.956906				0.906471
0.765794		0.715315	0.843782	0.711141				0.765794
0.878711		0.696673	0.748385	0.766292				0.878711
0.898058		0.797001	0.825446	0.933364				0.898058
0.905828		0.770113	0.811098	0.750837				0.905828
0.867614		0.818961	0.780573	0.911644				0.867614
0.852417		0.691984	0.682968	0.883835				0.852417
0.972361		0.751312	0.71283	0.846241				0.972361
0.81728		0.821178	0.867758	0.822956				0.81728
0.866387		0.702733	0.821807	0.771225				0.866387
0.968898		0.895893	0.963713	0.842703				0.968898
0.931085		0.837896	0.762917	0.887137				0.931085
0.940796		0.856563	0.828286	0.916034				0.940796
0.917208		0.801291	0.770375	0.949629				0.917208
0.935939		0.734347	0.896264	0.869304				0.935939
0.811245		0.82971	0.821595	0.949747				0.811245
0.875476		0.920949	0.912262	0.95014				0.875476
0.94889		0.694369	0.775167	0.947049				0.94889
0.874134		0.763189	0.956917	0.87971				0.874134
0.949208		0.771015	0.732189	0.946766				0.949208
0.941635		0.699441	0.746479	0.855514				0.941635
0.943737		0.799751	0.813527	0.890496				0.943737
0.957731		0.870264	0.916343	0.905704				0.957731
0.948403		0.716808	0.931915	0.951936				0.948403
0.960809		0.660315	0.688572	0.893646				0.960809
0.955862		0.780734	0.671853	0.818371				0.955862
0.966705		0.769083	0.801213	0.854419				0.966705
0.937608		0.714669	0.710292	0.969874				0.937608
0.916339		0.87873	0.880874	0.643272				0.916339
0.957425		0.861175	0.836758	0.856017				0.957425
0.857753		0.841214	0.755516	0.90125				0.857753
0.966505		0.773428	0.736485	0.912522				0.966505
0.969326		0.839545	0.608507	0.855402				0.969326
0.872283		0.694299	0.873175	0.593416				0.872283
0.763186		0.782007	0.678166	0.760348				0.763186
0.898415		0.866127	0.82034	0.882145				0.898415
0.970465		0.813586	0.877608	0.916678				0.970465
0.961804		0.787224	0.800594	0.938487				0.961804
0.943287		0.698025	0.818387	0.82502				0.943287
0.877837		0.800208	0.867863	0.924834				0.877837
0.961275		0.896122	0.671627	0.952727				0.961275
0.929		0.737178	0.659048	0.730301				0.929
0.937499		0.69897	0.746617	0.859866				0.937499
0.931724		0.832966	0.868891	0.972423				0.931724
0.863635		0.834562	0.5957	0.934956				0.863635
0.804823		0.830867	0.747819	0.759988				0.804823
0.945875		0.836853	0.745662	0.886919				0.945875
0.970868		0.858453	0.886662	0.539041				0.970868
0.922301		0.672109	0.709503	0.863388				0.922301
0.91486		0.709512	0.887981	0.902643				0.91486
0.955307		0.853065	0.771878	0.937953				0.955307
0.964599		0.907242	0.784879	0.763786				0.964599
0.926916		0.826237	0.646492	0.730985				0.926916
0.905282		0.775852	0.73945	0.912498				0.905282
0.917968		0.71482	0.815897	0.653128				0.917968
0.82007		0.798642	0.858153	0.933326				0.82007
0.835611		0.840105	0.91963	0.929717				0.835611
0.800839		0.848722	0.77561	0.77073				0.800839
0.939317		0.925055	0.695272	0.944193				0.939317
0.965078		0.910497	0.752786	0.930454				0.965078
0.950892		0.895097	0.831799	0.948898				0.950892
0.842887		0.749589	0.923019	0.753412				0.842887
0.946675		0.830098	0.678113	0.898816				0.946675
0.805535		0.654674	0.813067	0.822543				0.805535
0.943456		0.730538	0.701645	0.949762				0.943456
0.981243		0.885526	0.661419	0.744751				0.981243
0.946329		0.793821	0.752972	0.907205				0.946329
0.924457		0.697004	0.858581	0.906068				0.924457
0.919282		0.821409	0.814112	0.875284				0.919282
0.850782		0.731852	0.816589	0.82943				0.850782
0.858687		0.828808	0.730729	0.900579				0.858687
0.922806		0.880539	0.812359	0.821142				0.922806
0.897353		0.80469	0.808881	0.888164				0.897353
0.960428		0.741065	0.823694	0.572849				0.960428
0.934238		0.730839	0.875153	0.828389				0.934238
0.890241		0.767121	0.857553	0.825015				0.890241
0.892399		0.697496	0.88666	0.739436				0.892399
0.815809		0.766728	0.706656	0.762188				0.815809
0.83069		0.876195	0.884636	0.940158				0.83069
0.894662		0.777342	0.892709	0.83523				0.894662
0.864955		0.677423	0.756061	0.880036				0.864955
0.903948		0.752209	0.818012	0.899704				0.903948
0.973878		0.765579	0.822367	0.866874				0.973878
0.872316		0.747112	0.771424	0.912917				0.872316
0.905971		0.787682	0.590672	0.925372				0.905971
0.924996		0.729429	0.769398	0.819728				0.924996
0.894574		0.901539	0.829261	0.939574				0.894574
0.896429		0.823517	0.814268	0.827356				0.896429
0.938473		0.708369	0.618118	0.87664				0.938473
0.908995		0.75497	0.628106	0.942388				0.908995
0.857229		0.750256	0.633104	0.894087				0.857229
0.973771		0.797787	0.78284	0.883603				0.973771
0.933993		0.736457	0.673866	0.941995				0.933993
0.892461		0.696651	0.597926	0.874589				0.892461
0.79032		0.738322	0.701654	0.832015				0.79032
0.911263		0.872357	0.742098	0.922868				0.911263
0.919624		0.836951	0.733627	0.953316				0.919624
0.835324		0.818563	0.749306	0.932011				0.835324
0.954754		0.654511	0.776204	0.722587				0.954754
0.961374		0.768309	0.721605	0.931458				0.961374
0.966648		0.861935	0.762164	0.950967				0.966648
0.942393		0.882638	0.703508	0.817563				0.942393
0.95775		0.838081	0.724563	0.779505				0.95775
0.951936		0.776454	0.860057	0.847774				0.951936
0.910377		0.705335	0.685549	0.923453				0.910377
0.941986		0.799522	0.672762	0.912931				0.941986
0.732539		0.744351	0.927042	0.957765				0.732539
0.910007		0.635614	0.769611	0.910381				0.910007
0.963741		0.759752	0.720138	0.955267				0.963741
0.947332		0.609019	0.745185	0.786029				0.947332
0.955279		0.622439	0.736097	0.978054				0.955279
0.821464		0.698841	0.785067	0.788564				0.821464
0.973981		0.73216	0.891836	0.905575				0.973981
0.959004		0.757305	0.740023	0.815128				0.959004
0.911948		0.707031	0.739656	0.943939				0.911948
0.790416		0.673282	0.666309	0.871368				0.790416
0.966207		0.85772	0.739926	0.900882				0.966207
0.937162		0.791182	0.792811	0.929274				0.937162
0.867965		0.758299	0.931608	0.950177				0.867965
0.9592		0.816476	0.66324	0.897795				0.9592
0.983685		0.631027	0.898674	0.756256				0.983685
0.833507		0.744388	0.905289	0.852722				0.833507
0.844555		0.637816	0.585944	0.844463				0.844555
0.752398		0.642889	0.883242	0.925608				0.752398
0.906395		0.68739	0.863688	0.859626				0.906395
0.898625		0.751127	0.815224	0.750312				0.898625
0.889844		0.756583	0.903893	0.855912				0.889844
0.896694		0.777462	0.744399	0.848051				0.896694
0.890582		0.739968	0.76837	0.919953				0.890582
0.830428		0.705366	0.709318	0.791616				0.830428
0.846055		0.901619	0.92654	0.871263				0.846055
0.785289		0.850216	0.552909	0.954977				0.785289
0.852557		0.809026	0.80883	0.860289				0.852557
0.910728		0.710927	0.756275	0.801119				0.910728
0.833914		0.798141	0.794178	0.880339				0.833914
0.818957		0.94698	0.636713	0.89264				0.818957
0.962929		0.759609	0.714542	0.905892				0.962929
0.881847		0.892711	0.753755	0.936929				0.881847
0.945794		0.813745	0.931298	0.820771				0.945794
0.965631		0.716261	0.808927	0.963679				0.965631
0.801318		0.751212	0.784858	0.856489				0.801318
0.88475		0.714522	0.840676	0.912905				0.88475
0.816353		0.748936	0.785869	0.955959				0.816353
0.745488		0.705374	0.696135	0.837233				0.745488
0.805615		0.803865	0.684619	0.850417				0.805615
0.926232		0.777848	0.809343	0.808899				0.926232
0.91635		0.684189	0.728085	0.801096				0.91635
0.904685		0.787508	0.881143	0.836205				0.904685
0.893396		0.746892	0.681236	0.884053				0.893396
0.939687		0.684655	0.844602	0.953014				0.939687
0.743185		0.886952	0.777427	0.912332				0.743185
0.955553		0.906377	0.759022	0.71038				0.955553
0.916347		0.754596	0.835404	0.89287				0.916347
0.945117		0.719474	0.9713	0.899737				0.945117
0.971829		0.717507	0.798691	0.718411				0.971829
0.950251		0.820432	0.910727	0.702141				0.950251
0.932364		0.689446	0.839271	0.929869				0.932364
0.929441		0.743148	0.778349	0.776457				0.929441
0.870692		0.777268	0.762155	0.86389				0.870692
0.77046		0.799737	0.623194	0.881832				0.77046
0.717984		0.717096	0.745113	0.946299				0.717984
0.794286		0.669583	0.88741	0.950827				0.794286
0.513577		0.775081	0.780984	0.807854				0.513577
0.946078		0.729964	0.830919	0.923907				0.946078
0.877633		0.749134	0.856673	0.808112				0.877633
0.853318		0.838711	0.728106	0.768844				0.853318
0.85906		0.737413	0.805761	0.616707				0.85906
0.882954		0.667734	0.755712	0.525049				0.882954
0.970664		0.753311	0.759827	0.942173				0.970664
0.748529		0.824246	0.834949	0.859915				0.748529
0.959847		0.795736	0.474163	0.826793				0.959847
0.873967		0.795961	0.797378	0.866263				0.873967
0.955101		0.769384	0.882184	0.950223				0.955101
0.935874		0.858849	0.786848	0.795975				0.935874
0.838499		0.841017	0.793893	0.852483				0.838499
0.902095		0.83109	0.747516	0.877409				0.902095
0.961385		0.645403	0.771613	0.863917				0.961385
0.943667		0.762687	0.746826	0.963529				0.943667
0.739574		0.739981	0.866646	0.933962				0.739574
0.973275		0.83823	0.751663	0.956902				0.973275
0.953632		0.904634	0.692686	0.748922				0.953632
0.880674		0.742832	0.747493	0.905488				0.880674
0.935867		0.784731	0.726497	0.95755				0.935867
0.945815		0.864435	0.787361	0.689432				0.945815
0.875697		0.630063	0.866082	0.942259				0.875697
0.978882		0.781792	0.677606	0.85312				0.978882
0.549023		0.885685	0.767302	0.920888				0.549023
0.814148		0.69134	0.75004	0.782614				0.814148
0.978576		0.754767	0.807251	0.838374				0.978576
0.873644		0.674926	0.75355	0.773449				0.873644
0.835613		0.901001	0.76212	0.841977				0.835613
0.87992		0.808321	0.851029	0.641442				0.87992
0.919298		0.727408	0.901451	0.879561				0.919298
0.923963		0.700927	0.965146	0.883174				0.923963
0.907632		0.754497	0.781324	0.901859				0.907632
0.964785		0.796167	0.797282	0.886968				0.964785
0.959422		0.724848	0.724668	0.842416				0.959422
0.985561		0.861146	0.771585	0.656514				0.985561
0.818947		0.755766	0.752861	0.630114				0.818947
0.942106		0.831576	0.704379	0.890029				0.942106
0.845511		0.804871	0.800614	0.833528				0.845511
0.898849		0.789362	0.617589	0.929684				0.898849
0.901472		0.677892	0.798703	0.797963				0.901472
0.972329		0.83873	0.840655	0.894119				0.972329
0.895959		0.771433	0.903124	0.663406				0.895959
0.968632		0.813291	0.740088	0.880801				0.968632
0.931139		0.835678	0.487971	0.912039				0.931139
0.952759		0.754948	0.811112	0.796194				0.952759
0.925675		0.727309	0.978525	0.900948				0.925675
0.92952		0.821548	0.805709	0.961301				0.92952
0.89327		0.766113	0.834244	0.941968				0.89327
0.967024		0.843909	0.845583	0.591895				0.967024
0.953571		0.815598	0.662273	0.894019				0.953571
0.943358		0.678089	0.779924	0.946792				0.943358
0.968513		0.812717	0.73059	0.925609				0.968513
0.894094		0.894314	0.692813	0.728835				0.894094
0.974306		0.906063	0.878622	0.926614				0.974306
0.964708		0.945778	0.81939	0.923908				0.964708
0.979373		0.744617	0.816141	0.848791				0.979373
0.975756		0.846739	0.686447	0.835794				0.975756
0.967988		0.911488	0.77059	0.930425				0.967988
0.968508		0.767094	0.848651	0.879848				0.968508
0.961367		0.865815	0.71154	0.783678				0.961367
0.872073		0.747085	0.894098	0.828061				0.872073
0.967966		0.84773	0.790861	0.539789				0.967966
0.978423		0.775168	0.547661	0.772075				0.978423
0.85277		0.730309	0.748924	0.91615				0.85277
0.955999		0.729036	0.820659	0.863465				0.955999
0.890128		0.693995	0.860604	0.906428				0.890128
0.912094		0.797807	0.853071	0.928867				0.912094
0.868006		0.668489	0.806576	0.948141				0.868006
0.887996		0.704144	0.885928	0.872495				0.887996
0.925295		0.693642	0.603029	0.774132				0.925295
0.89369		0.879934	0.903939	0.947129				0.89369
0.872175		0.715554	0.898871	0.882348				0.872175
0.9238		0.824867	0.870126	0.823131				0.9238
0.948996		0.84474	0.82019	0.907294				0.948996
0.969539		0.763002	0.692526	0.880516				0.969539
0.916151		0.676371	0.943521	0.783996				0.916151
0.909883		0.80811	0.832177	0.867064				0.909883
0.956256		0.740963	0.832616	0.899789				0.956256
0.906028		0.737786	0.877892	0.944957				0.906028
0.951076		0.843073	0.954303	0.937284				0.951076
0.971786		0.895293	0.840194	0.785532				0.971786
0.873349		0.770334	0.788053	0.911833				0.873349
0.903758		0.663444	0.788037	0.926855				0.903758
0.842537		0.650151	0.808333	0.876828				0.842537
0.88047		0.68566	0.66414	0.95256				0.88047
0.864379		0.922578	0.782735	0.862066				0.864379
0.777433		0.81074	0.732244	0.863985				0.777433
0.82509		0.788854	0.825346	0.859016				0.82509
0.957892		0.900459	0.687331	0.882081				0.957892
0.654393		0.866754	0.586009	0.92318				0.654393
0.864529		0.870691	0.7504	0.922862				0.864529
0.790781		0.754137	0.695234	0.849642				0.790781
0.839935		0.818282	0.904075	0.908513				0.839935
0.911863		0.791872	0.77717	0.88349				0.911863
0.958876		0.693103	0.881328	0.925851				0.958876
0.887466		0.808814	0.696203	0.956452				0.887466
0.824593		0.794832	0.684367	0.944583				0.824593
0.781875		0.739807	0.740533	0.903856				0.781875
0.929275		0.65254	0.706552	0.953953				0.929275
0.743835		0.787118	0.836919	0.897509				0.743835
0.912245		0.819864	0.854775	0.893811				0.912245
0.824386		0.800856	0.899279	0.861498				0.824386
0.934209		0.786576	0.686104	0.832881				0.934209
0.941871		0.698259	0.821211	0.910662				0.941871
0.966849		0.935347	0.727271	0.891897				0.966849
0.874337		0.796879	0.717042	0.900478				0.874337
0.828175		0.820804	0.730741	0.970894				0.828175
0.858213		0.895625	0.906529	0.945157				0.858213
0.969955		0.782182	0.684483	0.874078				0.969955
0.898486		0.665804	0.586773	0.931996				0.898486
0.852081		0.851844	0.76887	0.919066				0.852081
0.861106		0.714216	0.918617	0.919541				0.861106
0.885935		0.85951	0.730594	0.792883				0.885935
0.966687		0.721673	0.809568	0.931772				0.966687
0.917085		0.724047	0.680834	0.928792				0.917085
0.760087		0.720818	0.779712	0.925532				0.760087
0.9267		0.576118	0.89856	0.803153				0.9267
0.96313		0.686628	0.570769	0.944887				0.96313
0.888051		0.693865	0.757237	0.931927				0.888051
0.95966		0.685015	0.763486	0.855779				0.95966
0.948967		0.734086	0.797602	0.977812				0.948967
0.862372		0.772138	0.831035	0.961343				0.862372
0.91811		0.781941	0.831357	0.914557				0.91811
0.955199		0.886485	0.93163	0.808112				0.955199
0.918908		0.701767	0.762549	0.781631				0.918908
0.84217		0.673594	0.770501	0.867628				0.84217
0.972421		0.751598	0.925983	0.910128				0.972421
0.942053		0.804127	0.852523	0.946001				0.942053
0.959228		0.684417	0.723741	0.907588				0.959228
0.89352		0.61442	0.742189	0.951281				0.89352
0.827299		0.865501	0.780312	0.862356				0.827299
0.923924		0.755228	0.777189	0.807585				0.923924
0.940829		0.863896	0.776302	0.952702				0.940829
0.780635		0.778812	0.543594	0.942227				0.780635
0.973956		0.716518	0.649477	0.850901				0.973956
0.913853		0.71724	0.833906	0.871398				0.913853
0.918324		0.929814	0.921925	0.850473				0.918324
0.947229		0.889632	0.812879	0.8525				0.947229
0.848048		0.651677	0.690623	0.810314				0.848048
0.871509		0.639847	0.651307	0.82844				0.871509
0.951825		0.866882	0.818895	0.81609				0.951825
0.942001		0.68162	0.712991	0.90111				0.942001
0.867741		0.698153	0.780845	0.907793				0.867741
0.95882		0.699073	0.85927	0.864467				0.95882
0.934221		0.883324	0.897016	0.904643				0.934221
0.901448		0.697756	0.893679	0.925478				0.901448
0.867761		0.672429	0.708005	0.620363				0.867761
0.932208		0.784752	0.647597	0.617176				0.932208
0.961294		0.86356	0.730811	0.754995				0.961294
0.960158		0.79504	0.942361	0.690174				0.960158
0.735315		0.759852	0.86345	0.560695				0.735315
0.865244		0.783288	0.731104	0.928537				0.865244
0.868756		0.712163	0.781674	0.885924				0.868756
0.949254		0.783717	0.734247	0.836584				0.949254
0.944588		0.652785	0.707596	0.811892				0.944588
0.842119		0.770736	0.86392	0.855249				0.842119
0.929068		0.759809	0.868378	0.945149				0.929068
0.946065		0.816072	0.79875	0.894457				0.946065
0.961593		0.704873	0.818558	0.904624				0.961593
0.853141		0.611048	0.761429	0.931667				0.853141
0.980136		0.838323	0.883528	0.913356				0.980136
0.971354		0.670106	0.718062	0.834913				0.971354
0.917175		0.819244	0.684702	0.944352				0.917175
0.894358		0.750407	0.696465	0.776015				0.894358
0.939999		0.688449	0.775424	0.933298				0.939999
0.860915		0.835459	0.899323	0.790943				0.860915
0.881858		0.911175	0.840236	0.908532				0.881858
0.866991		0.744881	0.775211	0.823534				0.866991
0.936086		0.714092	0.947533	0.9042				0.936086
0.760845		0.754716	0.747942	0.921955				0.760845
0.973927		0.858249	0.851531	0.859651				0.973927
0.948534		0.593222	0.871555	0.896613				0.948534
0.851698		0.691771	0.79425	0.848791				0.851698
0.958635		0.756504	0.824699	0.895847				0.958635
0.974381		0.801344	0.8346	0.905129				0.974381
0.875003		0.676843	0.904585	0.906831				0.875003
0.916424		0.799687	0.717554	0.907294				0.916424
0.809108		0.794557	0.816286	0.938139				0.809108
0.930776		0.737463	0.960471	0.843011				0.930776
0.932079		0.730889	0.732336	0.899128				0.932079
0.874354		0.759825	0.967111	0.96154				0.874354
0.945884		0.751878	0.770908	0.942873				0.945884
0.827872		0.821957	0.831392	0.86632				0.827872
0.924679		0.841207	0.829024	0.946477				0.924679
0.964246		0.798086	0.680176	0.885173				0.964246
0.930359		0.78131	0.680226	0.887929				0.930359
0.954529		0.730699	0.831703	0.909				0.954529
0.860918		0.828083	0.797312	0.90838				0.860918
0.969709		0.96026	0.795626	0.90364				0.969709
0.947892		0.826643	0.820704	0.896421				0.947892
0.949812		0.872449	0.724462	0.889598				0.949812
0.883939		0.785342	0.767877	0.917596				0.883939
0.955115		0.707673	0.667399	0.90411				0.955115
0.973007		0.898427	0.720342	0.845731				0.973007
0.847287		0.907204	0.839785	0.847188				0.847287
0.830112		0.879364	0.834658	0.805746				0.830112
0.684914		0.849403	0.792089	0.857903				0.684914
0.93381		0.845789	0.732098	0.750094				0.93381
0.773896		0.755715	0.914408	0.839889				0.773896
0.950509		0.962641	0.803818	0.825701				0.950509
0.945929		0.766268	0.681575	0.875219				0.945929
0.917604		0.770559	0.713559	0.832338				0.917604
0.955664		0.763635	0.769182	0.968576				0.955664
0.963854		0.942461	0.73354	0.93047				0.963854
0.896524		0.858208	0.729166	0.924909				0.896524
0.936696		0.811289	0.801642	0.928416				0.936696
0.905017		0.828833	0.816085	0.800587				0.905017
0.860695		0.842953	0.896868	0.95012				0.860695
0.967525		0.903838	0.860072	0.922817				0.967525
0.749166		0.923973	0.81132	0.897533				0.749166
0.893849		0.920965	0.641771	0.950806				0.893849
0.937963		0.898583	0.860641	0.823114				0.937963
0.982295		0.864579	0.875423	0.882623				0.982295
0.833273		0.854577	0.868346	0.94913				0.833273
0.855095		0.802896	0.550834	0.887899				0.855095
0.871258		0.78295	0.854899	0.969211				0.871258
0.843439		0.893857	0.698981	0.661242				0.843439
0.763382		0.801519	0.795586	0.831118				0.763382
0.915665		0.940507	0.886001	0.916483				0.915665
0.7063		0.897062	0.750151	0.881341				0.7063
0.744788		0.720616	0.879937	0.924865				0.744788
0.858556		0.683582	0.938189	0.826093				0.858556
0.882948		0.731306	0.916654	0.813084				0.882948
0.875528		0.748314	0.814728	0.710354				0.875528
0.893267		0.796247	0.872903	0.933764				0.893267
0.858992		0.590877	0.940094	0.850438				0.858992
0.867153		0.859958	0.863736	0.921924				0.867153
0.910983		0.888074	0.782041	0.962094				0.910983
0.957437		0.765507	0.763219	0.937314				0.957437
0.937261		0.847183	0.625435	0.871709				0.937261
0.93959		0.889667	0.719288	0.827038				0.93959
0.937486		0.787888	0.755411	0.933				0.937486
0.885654		0.772799	0.970267	0.891068				0.885654
0.925519		0.862838	0.686357	0.810585				0.925519
0.944324		0.736693	0.715573	0.91743				0.944324
0.928775		0.824548	0.878775	0.956473				0.928775
0.834182		0.691029	0.764117	0.927026				0.834182
0.876117		0.885013	0.678161	0.928109				0.876117
0.828831		0.808483	0.789386	0.905773				0.828831
0.935903		0.721298	0.57289	0.878446				0.935903
0.88346		0.753776	0.825129	0.890761				0.88346
0.877224		0.891144	0.73377	0.912117				0.877224
0.825185		0.905256	0.902597	0.914211				0.825185
0.863749		0.764737	0.841783	0.894006				0.863749
0.817862		0.793642	0.810555	0.921292				0.817862
0.875182		0.915657	0.866275	0.59415				0.875182
0.969814		0.725493	0.70068	0.916199				0.969814
0.80206		0.839596	0.897143	0.955543				0.80206
0.920777		0.890547	0.847184	0.839182				0.920777
0.815974		0.86507	0.953515	0.927422				0.815974
0.855395		0.832214	0.817517	0.956559				0.855395
0.880926		0.89542	0.72869	0.826971				0.880926
0.974569		0.808917	0.825685	0.904651				0.974569
0.950891		0.968551	0.663197	0.939346				0.950891
0.892411		0.860582	0.773916	0.917658				0.892411
0.93126		0.864692	0.849672	0.725397				0.93126
0.953082		0.823161	0.623524	0.894402				0.953082
0.949273		0.863221	0.652982	0.889433				0.949273
0.879814		0.927139	0.779206	0.915631				0.879814
0.833148		0.922619	0.83469	0.843072				0.833148
0.835526		0.746986	0.690332	0.863116				0.835526
0.939351		0.852093	0.738029	0.839109				0.939351
0.93813		0.841539	0.772163	0.946577				0.93813
0.738173		0.898105	0.780772	0.940721				0.738173
0.9743		0.775588	0.657631	0.798147				0.9743
0.971833		0.83048	0.798913	0.704078				0.971833
0.925205		0.898314	0.917621	0.90379				0.925205
0.916481		0.892322	0.841094	0.901291				0.916481
0.75023		0.758815	0.825895	0.936675				0.75023
0.941298		0.932631	0.708027	0.785576				0.941298
0.935696		0.793945	0.750916	0.80251				0.935696
0.788841		0.961682	0.719056	0.928029				0.788841
0.868273		0.847143	0.796164	0.892021				0.868273
0.833229		0.728923	0.76134	0.813014				0.833229
0.953108		0.760236	0.829744	0.957067				0.953108
0.977922		0.672044	0.875887	0.924509				0.977922
0.895015		0.885992	0.682349	0.926944				0.895015
0.888084		0.728191	0.907626	0.86222				0.888084
0.877127		0.726908	0.694487	0.828049				0.877127
0.948457		0.775109	0.656423	0.882159				0.948457
0.93611		0.804754	0.677122	0.771919				0.93611
0.747511		0.661321	0.651251	0.943747				0.747511
0.935873		0.624556	0.694415	0.835856				0.935873
0.92651		0.694547	0.780632	0.867727				0.92651
0.935411		0.69632	0.655944	0.848992				0.935411
0.949775		0.732687	0.735446	0.709193				0.949775
0.891369		0.686951	0.760091	0.841699				0.891369
0.894998		0.698717	0.620128	0.753417				0.894998
0.93488		0.667947	0.912587	0.867224				0.93488
0.958428		0.711672	0.67663	0.823899				0.958428
0.930068		0.684351	0.785676	0.825851				0.930068
0.888764		0.698841	0.750353	0.923591				0.888764
0.899256		0.716266	0.849034	0.863525				0.899256
0.972528		0.818416	0.74208	0.857005				0.972528
0.900275		0.870338	0.806142	0.766757				0.900275
0.790781		0.797717	0.77243	0.949211				0.790781
0.804007		0.739187	0.751778	0.846801				0.804007
0.917417		0.671256	0.852987	0.889039				0.917417
0.959144		0.609698	0.834172	0.679625				0.959144
0.9396		0.812249	0.664223	0.915603				0.9396
0.970114		0.799971	0.886354	0.672258				0.970114
0.957882		0.634748	0.819355	0.869336				0.957882
0.952756		0.775367	0.648022	0.589101				0.952756
0.899993		0.74255	0.899504	0.883859				0.899993
0.917221		0.610333	0.888458	0.866832				0.917221
0.854874		0.667854	0.754368	0.611326				0.854874
0.892709		0.688054	0.909406	0.691062				0.892709
0.943741		0.728321	0.705949	0.830313				0.943741
0.912094		0.735505	0.864395	0.944935				0.912094
0.912899		0.71991	0.831172	0.945874				0.912899
0.950333		0.84884	0.85682	0.792158				0.950333
0.891949		0.754165	0.846319	0.903351				0.891949
0.963141		0.798201	0.749151	0.873837				0.963141
0.782646		0.751757	0.936322	0.931002				0.782646
0.956285		0.700558	0.812567	0.899541				0.956285
0.948316		0.733715	0.812592	0.86289				0.948316
0.98355		0.668311	0.835948	0.693288				0.98355
0.908354		0.74341	0.865217	0.819311				0.908354
0.847447		0.73752	0.870908	0.79161				0.847447
0.904813		0.788373	0.851994	0.806237				0.904813
0.969031		0.771641	0.783482	0.921846				0.969031
0.95593		0.802873	0.777052	0.933645				0.95593
0.9502		0.767773	0.635655	0.879354				0.9502
0.960766		0.687814	0.652342	0.890177				0.960766
0.914889		0.82554	0.813705	0.897663				0.914889
0.877546		0.906819	0.81219	0.826262				0.877546
0.97097		0.883181	0.814021	0.74769				0.97097
0.947601		0.734891	0.938097	0.927476				0.947601
0.919077		0.647863	0.675885	0.924464				0.919077
0.738346		0.594858	0.803882	0.944315				0.738346
0.953523		0.680281	0.775427	0.939808				0.953523
0.944031		0.809392	0.829986	0.838704				0.944031
0.932118		0.664165	0.851664	0.925327				0.932118
0.829834		0.797901	0.834044	0.764853				0.829834
0.934169		0.887886	0.73311	0.879049				0.934169
0.814369		0.891627	0.878355	0.957237				0.814369
0.915449		0.740419	0.925672	0.819945				0.915449
0.885961		0.738802	0.790231	0.866308				0.885961
0.890117		0.761628	0.815796	0.711385				0.890117
0.865676		0.861282	0.656641	0.896839				0.865676
0.942038		0.667299	0.709198	0.61441				0.942038
0.968666		0.758839	0.875717	0.89714				0.968666
0.919245		0.644726	0.818908	0.894903				0.919245
0.886894		0.646236	0.840718	0.920006				0.886894
0.871927		0.837683	0.680624	0.833933				0.871927
0.949419		0.875982	0.691682	0.667252				0.949419
0.952769		0.712981	0.928987	0.949988				0.952769
0.941526		0.827696	0.912714	0.912498				0.941526
0.962511		0.759076	0.769734	0.919039				0.962511
0.94999		0.747558	0.638048	0.857922				0.94999
0.758514		0.702797	0.900441	0.849524				0.758514
0.821801		0.901189	0.872139	0.779446				0.821801
0.88178		0.866056	0.869851	0.940286				0.88178
0.914998		0.776621	0.829273	0.961056				0.914998
0.881177		0.791579	0.776812	0.954037				0.881177
0.928148		0.931918	0.910023	0.893684				0.928148
0.960489		0.835873	0.655576	0.864378				0.960489
0.814799		0.710837	0.823345	0.957381				0.814799
0.831825		0.865401	0.662727	0.94423				0.831825
0.961128		0.604519	0.90579	0.922014				0.961128
0.860226		0.816767	0.913811	0.823385				0.860226
0.930186		0.837378	0.720741	0.948536				0.930186
0.874375		0.882158	0.906996	0.803306				0.874375
0.954431		0.907395	0.900898	0.905683				0.954431
0.977339		0.788745	0.686497	0.956176				0.977339
0.962646		0.939176	0.889392	0.881329				0.962646
0.845907		0.758424	0.860246	0.916484				0.845907
0.860147		0.92822	0.934434	0.892171				0.860147
0.893222		0.747923	0.774656	0.88359				0.893222
0.903555		0.76641	0.82895	0.912669				0.903555
0.859042		0.778539	0.55155	0.920281				0.859042
0.962391		0.927998	0.674864	0.669287				0.962391
0.894488		0.705209	0.696121	0.87292				0.894488
0.869322		0.871457	0.645895	0.763849				0.869322
0.924204		0.819647	0.73614	0.931927				0.924204
0.919906		0.854988	0.680541	0.84288				0.919906
0.872043		0.803305	0.750183	0.826455				0.872043
0.896864		0.587433	0.791461	0.806435				0.896864
0.956509		0.694836	0.721876	0.887261				0.956509
0.960468		0.793019	0.765785	0.926402				0.960468
0.951673		0.847998	0.745002	0.78232				0.951673
0.964758		0.817349	0.869467	0.928002				0.964758
0.811953		0.768373	0.833648	0.912624				0.811953
0.826431		0.708954	0.644448	0.884642				0.826431
0.940304		0.943942	0.74275	0.877358				0.940304
0.937232		0.664707	0.686126	0.716432				0.937232
0.951441		0.874565	0.965298	0.946825				0.951441
0.975527		0.769348	0.686712	0.86815				0.975527
0.957757		0.89107	0.620369	0.913167				0.957757
0.733705		0.76447	0.911018	0.853336				0.733705
0.944742		0.724168	0.897327	0.789282				0.944742
0.864159		0.824662	0.763255	0.734138				0.864159
0.863536		0.943005	0.847872	0.857656				0.863536
0.931519		0.619748	0.827213	0.854356				0.931519
0.945803		0.802267	0.892969	0.937727				0.945803
0.799797		0.874443	0.886546	0.93472				0.799797
0.94462		0.598033	0.800662	0.936062				0.94462
0.924365		0.752287	0.937691	0.914237				0.924365
0.861969		0.870249	0.77039	0.676157				0.861969
0.843866		0.900332	0.917074	0.858432				0.843866
0.804262		0.90785	0.798862	0.936617				0.804262
0.932574		0.952787	0.887028	0.938762				0.932574
0.948147		0.851142	0.905634	0.920817				0.948147
0.918803		0.708633	0.659643	0.858811				0.918803
0.831922		0.921713	0.93015	0.953416				0.831922
0.930139		0.675969	0.880985	0.888137				0.930139
0.847717		0.731149	0.782633	0.776714				0.847717
0.733302		0.819813	0.711197	0.946733				0.733302
0.878669		0.864562	0.713373	0.874106				0.878669
0.847693		0.795026	0.80894	0.921518				0.847693
0.789226		0.904418	0.839349	0.809518				0.789226
0.946134		0.918647	0.73118	0.855117				0.946134
0.864794		0.913569	0.7746	0.894363				0.864794
0.865147		0.82708	0.738134	0.867614				0.865147
0.93139		0.859391	0.729538	0.928022				0.93139
0.918687		0.849514	0.62437	0.673549				0.918687
0.750792		0.936483	0.686137	0.734274				0.750792
0.885803		0.877486	0.714876	0.80196				0.885803
0.927369		0.876288	0.541486	0.902209				0.927369
0.864578		0.818556	0.677866	0.908188				0.864578
0.971564		0.736943	0.823542	0.910605				0.971564
0.872839		0.834157	0.813112	0.94731				0.872839
0.854258		0.769866	0.739309	0.729648				0.854258
0.919517		0.831501	0.729861	0.881721				0.919517
0.870171		0.852597	0.748033	0.915591				0.870171
0.887928		0.832571	0.938982	0.718237				0.887928
0.842973		0.887517	0.796545	0.904105				0.842973
0.96267		0.602254	0.753261	0.82921				0.96267
0.875996		0.907987	0.871356	0.84661				0.875996
0.926535		0.750568	0.842464	0.742928				0.926535
0.920707		0.713935	0.731123	0.917167				0.920707
0.918442		0.784638	0.664743	0.828248				0.918442
0.955514		0.894602	0.685853	0.71872				0.955514
0.88668		0.91966	0.918402	0.931965				0.88668
0.803054		0.903784	0.649922	0.85657				0.803054
0.976806		0.742148	0.898373	0.743257				0.976806
0.971733		0.735347	0.822663	0.842932				0.971733
0.916975		0.833995	0.882625	0.940216				0.916975
0.938445		0.75475	0.826324	0.900189				0.938445
0.83863		0.790903	0.87872	0.888614				0.83863
0.929737		0.655691	0.745671	0.885482				0.929737
0.938724		0.747372	0.835068	0.882199				0.938724
0.910864		0.953111	0.667262	0.910494				0.910864
0.944216		0.76313	0.703047	0.739906				0.944216
0.967331		0.805974	0.86138	0.92927				0.967331
0.962301		0.750233	0.792868	0.915391				0.962301
0.892894		0.747329	0.857661	0.68018				0.892894
0.81891		0.746811	0.729876	0.96765				0.81891
0.974386		0.755736	0.807274	0.660991				0.974386
0.896612		0.851909	0.797353	0.915307				0.896612
0.884291		0.784273	0.846494	0.732065				0.884291
0.924622		0.689914	0.654029	0.822379				0.924622
0.941403		0.771325	0.620646	0.797063				0.941403
0.887505		0.893897	0.727286	0.862642				0.887505
0.970006		0.858451	0.892574	0.871654				0.970006
0.956212		0.793365	0.761033	0.875308				0.956212
0.97302		0.783937	0.839944	0.727854				0.97302
0.889419		0.752848	0.855895	0.747528				0.889419
0.943196		0.74069	0.78499	0.858751				0.943196
0.918831		0.880051	0.805747	0.851655				0.918831
0.815902		0.757517	0.739331	0.813006				0.815902
0.966572		0.873245	0.750709	0.768275				0.966572
0.882641		0.730889	0.497171	0.61157				0.882641
0.936224		0.793773	0.635001	0.827946				0.936224
0.884748		0.798833	0.763703	0.907059				0.884748
0.861317		0.69513	0.803152	0.581003				0.861317
0.842998		0.826106	0.637563	0.881188				0.842998
0.860099		0.802537	0.915784	0.857234				0.860099
0.886662		0.820759	0.85353	0.768855				0.886662
0.937735		0.750876	0.878859	0.917054				0.937735
0.810992		0.793658	0.738622	0.926593				0.810992
0.893768		0.834269	0.683152	0.903726				0.893768
0.957022		0.833818	0.672409	0.755293				0.957022
0.90668		0.767742	0.891666	0.864507				0.90668
0.916945		0.751312	0.679332	0.769553				0.916945
0.946985		0.777758	0.913436	0.820604				0.946985
0.885113		0.812303	0.755989	0.936714				0.885113
0.968715		0.823893	0.790916	0.88401				0.968715
0.941484		0.744835	0.781364	0.927152				0.941484
0.865078		0.880923	0.731468	0.656439				0.865078
0.964595		0.899809	0.802379	0.80941				0.964595
0.902237		0.85682	0.8014	0.951148				0.902237
0.911911		0.821831	0.778744	0.922624				0.911911
0.863805		0.802173	0.787008	0.833668				0.863805
0.80691		0.770979	0.695705	0.868893				0.80691
0.914509		0.856552	0.689123	0.823856				0.914509
0.872243		0.735462	0.735794	0.924213				0.872243
0.841592		0.790619	0.750659	0.91513				0.841592
0.774712		0.941755	0.664113	0.906163				0.774712
0.954932		0.818071	0.804756	0.862909				0.954932
0.95637		0.869924	0.938957	0.924382				0.95637
0.990391		0.893255	0.875858	0.83885				0.990391
0.991648		0.759639	0.89231	0.86396				0.991648
0.871338		0.731249	0.897134	0.743996				0.871338
0.91438		0.773584	0.687988	0.829165				0.91438
0.947414		0.778819	0.73738	0.657347				0.947414
0.955804		0.792876	0.759814	0.824841				0.955804
0.737899		0.795235	0.715818	0.922009				0.737899
0.88836		0.786348	0.720903	0.931056				0.88836
0.948434		0.794316	0.810947	0.92033				0.948434
0.868498		0.915728	0.714087	0.847589				0.868498
0.92231		0.925374	0.931303	0.981439				0.92231
0.884973		0.784223	0.679373	0.953893				0.884973
0.920571		0.744494	0.741865	0.909607				0.920571
0.793507		0.843018	0.744827	0.908818				0.793507
0.945365		0.702608	0.873722	0.953754				0.945365
0.836738		0.931668	0.779806	0.691627				0.836738
0.888604		0.81601	0.775499	0.851722				0.888604
0.906168		0.766762	0.658217	0.938874				0.906168
0.955068		0.753743	0.81136	0.838852				0.955068
0.920233		0.806247	0.742117	0.745951				0.920233
0.974382		0.79661	0.930376	0.641891				0.974382
0.965059		0.761809	0.862241	0.894006				0.965059
0.918454		0.803359	0.726488	0.95071				0.918454
0.853548		0.838536	0.740579	0.795541				0.853548
0.929008		0.948902	0.735427	0.87189				0.929008
0.936703		0.904588	0.781059	0.82107				0.936703
0.925208		0.823984	0.850172	0.807505				0.925208
0.799834		0.801776	0.758518	0.920434				0.799834
0.920353		0.716715	0.535522	0.800163				0.920353
0.782432		0.763032	0.616779	0.911238				0.782432
0.888078		0.773753	0.769051	0.927825				0.888078
0.968387		0.757541	0.811246	0.845922				0.968387
0.956506		0.795856	0.690223	0.923966				0.956506
0.965019		0.878876	0.82456	0.831391				0.965019
0.88129		0.84073	0.907	0.853193				0.88129
0.932477		0.949471	0.853846	0.80908				0.932477
0.814947		0.663303	0.706648	0.636174				0.814947
0.901089		0.635698	0.899787	0.84169				0.901089
0.961162		0.821057	0.55316	0.761465				0.961162
0.745895		0.830462	0.68978	0.777704				0.745895
0.861711		0.721896	0.891336	0.819006				0.861711
0.894259		0.720166	0.782038	0.934463				0.894259
0.962777		0.687171	0.735785	0.916737				0.962777
0.808361		0.765636	0.885864	0.926441				0.808361
0.797597		0.718157	0.747717	0.926281				0.797597
0.78145		0.606235	0.692922	0.782704				0.78145
0.83671		0.654284	0.822986	0.882477				0.83671
0.979202		0.73215	0.762689	0.61735				0.979202
0.892146		0.669052	0.919428	0.882312				0.892146
0.95197		0.75196	0.801295	0.909016				0.95197
0.925928		0.603768	0.777033	0.73709				0.925928
0.975577		0.853957	0.904529	0.939268				0.975577
0.80723		0.857044	0.871123	0.822956				0.80723
0.961884		0.660044	0.845146	0.859136				0.961884
0.837821		0.660805	0.876651	0.905892				0.837821
0.919803		0.772933	0.855844	0.754843				0.919803
0.875087		0.68744	0.653415	0.916281				0.875087
0.825276		0.653436	0.849653	0.871637				0.825276
0.792223		0.72185	0.851133	0.973406				0.792223
0.953017		0.870104	0.690077	0.833181				0.953017
0.904015		0.787403	0.908298	0.745206				0.904015
0.929833		0.80152	0.793945	0.816741				0.929833
0.866549		0.638735	0.625434	0.785856				0.866549
0.945958		0.787893	0.887111	0.924617				0.945958
0.97529		0.700889	0.94006	0.902365				0.97529
0.925946		0.706076	0.722619	0.966205				0.925946
0.901701		0.824116	0.77024	0.862728				0.901701
0.877404		0.724192	0.763163	0.960933				0.877404
0.959621		0.746186	0.915772	0.89045				0.959621
0.963901		0.656022	0.822277	0.87969				0.963901
0.942786		0.647482	0.73518	0.934557				0.942786
0.96632		0.758835	0.805825	0.92927				0.96632
0.931395		0.736767	0.796403	0.784197				0.931395
0.949383		0.754287	0.704599	0.89623				0.949383
0.822902		0.818338	0.79842	0.754886				0.822902
0.917148		0.674858	0.814938	0.915771				0.917148
0.945481		0.687424	0.651846	0.916563				0.945481
0.848284		0.887037	0.699036	0.761465				0.848284
0.933097		0.713864	0.648859	0.90266				0.933097
0.955732		0.655614	0.658523	0.846108				0.955732
0.918644		0.697669	0.816844	0.662155				0.918644
0.89859		0.745975	0.720098	0.948475				0.89859
0.810914		0.875817	0.870151	0.917789				0.810914
0.846857		0.896929	0.77889	0.774521				0.846857
0.929443		0.824277	0.871976	0.798284				0.929443
0.938733		0.847844	0.79524	0.867325				0.938733
0.881707		0.803647	0.743974	0.806489				0.881707
0.934348		0.804568	0.865203	0.81466				0.934348
0.872597		0.719304	0.850878	0.887603				0.872597
0.914855		0.833259	0.721321	0.883804				0.914855
0.768045		0.949544	0.873264	0.519403				0.768045
0.857869		0.84616	0.681647	0.826114				0.857869
0.958587		0.805052	0.676032	0.82054				0.958587
0.820491		0.854765	0.928771	0.88423				0.820491
0.907961		0.959601	0.824596	0.910915				0.907961
0.854664		0.92929	0.852181	0.775192				0.854664
0.958246		0.836485	0.848505	0.937475				0.958246
0.689913		0.892527	0.625902	0.813474				0.689913
0.918017		0.932976	0.777201	0.679775				0.918017
0.884173		0.813714	0.942024	0.908948				0.884173
0.772994		0.771793	0.863839	0.905739				0.772994
0.70416		0.899845	0.645384	0.904993				0.70416
0.697871		0.789571	0.645377	0.938286				0.697871
0.950991		0.883545	0.753398	0.831223				0.950991
0.823793		0.767939	0.677887	0.869548				0.823793
0.951957		0.824142	0.837728	0.859229				0.951957
0.951781		0.734841	0.686553	0.944085				0.951781
0.923047		0.752277	0.737454	0.823076				0.923047
0.759434		0.808707	0.745169	0.874565				0.759434
0.927833		0.840027	0.788794	0.892714				0.927833
0.875866		0.901732	0.697544	0.86759				0.875866
0.98605		0.687413	0.738905	0.928476				0.98605
0.872701		0.834572	0.583517	0.841836				0.872701
0.949143		0.884886	0.778407	0.913878				0.949143
0.810594		0.86606	0.7273	0.881327				0.810594
0.912476		0.844245	0.912051	0.880008				0.912476
0.923724		0.788078	0.830161	0.897648				0.923724
0.933018		0.763104	0.863455	0.8046				0.933018
0.881733		0.713057	0.760537	0.84497				0.881733
0.870048		0.806298	0.761464	0.920802				0.870048
0.818642		0.845611	0.872044	0.837323				0.818642
0.723818		0.846477	0.791867	0.923756				0.723818
0.894497		0.837315	0.794694	0.913004				0.894497
0.852665		0.755354	0.806158	0.896632				0.852665
0.816839		0.840251	0.908449	0.866829				0.816839
0.944436		0.812385	0.788218	0.922635				0.944436
0.921727		0.788256	0.777397	0.892692				0.921727
0.930329		0.828082	0.743279	0.823264				0.930329
0.908586		0.908601	0.70498	0.925225				0.908586
0.961642		0.942686	0.732601	0.846946				0.961642
0.915825		0.86451	0.81466	0.83802				0.915825
0.796683		0.719773	0.758432	0.901455				0.796683
0.925277		0.917116	0.941297	0.963504				0.925277
0.968033		0.836551	0.867994	0.867999				0.968033
0.94959		0.751379	0.687052	0.835321				0.94959
0.88483		0.918139	0.778541	0.874337				0.88483
0.902488		0.740428	0.675017	0.921348				0.902488
0.864809		0.771222	0.86597	0.930212				0.864809
0.785227		0.878667	0.743391	0.917592				0.785227
0.940666		0.835095	0.731636	0.767192				0.940666
0.917821		0.881781	0.684229	0.922992				0.917821
0.943076		0.840239	0.73445	0.565734				0.943076
0.909395		0.838523	0.647358	0.847212				0.909395
0.819729		0.916561	0.709706	0.617738				0.819729
0.828264		0.81632	0.855182	0.960315				0.828264
0.959601		0.798759	0.765495	0.913953				0.959601
0.949521		0.556536	0.840337	0.822851				0.949521
0.891684		0.735012	0.656657	0.882396				0.891684
0.83599		0.889607	0.841629	0.914465				0.83599
0.970037		0.863291	0.80011	0.866546				0.970037
0.935625		0.785182	0.861669	0.83281				0.935625
0.772098		0.720676	0.845963	0.825123				0.772098
0.829008		0.686385	0.707634	0.821926				0.829008
0.940068		0.835775	0.764456	0.949547				0.940068
0.981713		0.77089	0.760989	0.927639				0.981713
0.965076		0.81064	0.744616	0.888398				0.965076
0.960407		0.730555	0.661902	0.167823				0.960407
0.871195		0.795157	0.740934	0.677339				0.871195
0.952917		0.800998	0.842641	0.82523				0.952917
0.906407		0.783486	0.709055	0.922019				0.906407
0.923394		0.797452	0.786089	0.935661				0.923394
0.957666		0.834096	0.777005	0.910817				0.957666
0.914458		0.791186	0.864182	0.86244				0.914458
0.948285		0.847346	0.760186	0.932				0.948285
0.90812		0.914777	0.596473	0.932981				0.90812
0.887658		0.733737	0.855936	0.901275				0.887658
0.945753		0.910665	0.743067	0.91554				0.945753
0.820397		0.778905	0.76795	0.93923				0.820397
0.829192		0.825322	0.912719	0.722685				0.829192
0.934482		0.849088	0.801752	0.697282				0.934482
0.95941		0.855332	0.890414	0.871939				0.95941
0.692042		0.679767	0.868421	0.857442				0.692042
0.920326		0.795278	0.701272	0.738239				0.920326
0.921132		0.66924	0.785344	0.80128				0.921132
0.877663		0.692046	0.80936	0.899378				0.877663
0.928832		0.826273	0.741497	0.857442				0.928832
0.895091		0.755641	0.776091	0.906457				0.895091
0.883907		0.774497	0.63988	0.830924				0.883907
0.811844		0.778606	0.790062	0.894378				0.811844
0.890714		0.788034	0.746832	0.70157				0.890714
0.907427		0.699328	0.858164	0.926106				0.907427
0.851292		0.826456	0.881731	0.945139				0.851292
0.824014		0.761732	0.753325	0.946161				0.824014
0.788512		0.906441	0.7839	0.728712				0.788512
0.852828		0.826703	0.797336	0.851378				0.852828
0.796281		0.790033	0.707567	0.830118				0.796281
0.760347		0.741294	0.762603	0.889224				0.760347
0.767464		0.8542	0.95594	0.943551				0.767464
0.890453		0.794409	0.788377	0.920434				0.890453
0.921098		0.753188	0.824123	0.942841				0.921098
0.772232		0.939317	0.79485	0.960784				0.772232
0.935957		0.813925	0.722639	0.873947				0.935957
0.932733		0.791337	0.855667	0.859844				0.932733
0.854788		0.774708	0.823648	0.919305				0.854788
0.928375		0.78777	0.614399	0.733356				0.928375
0.833221		0.783138	0.945412	0.924002				0.833221
0.77034		0.723182	0.869751	0.708756				0.77034
0.833812		0.756866	0.795225	0.896524				0.833812
0.923048		0.629662	0.818095	0.910923				0.923048
0.916235		0.857721	0.904514	0.840022				0.916235
0.887402		0.741948	0.781896	0.904851				0.887402
0.88453		0.627057	0.666442	0.91028				0.88453
0.791432		0.727735	0.81741	0.934996				0.791432
0.737647		0.839305	0.888994	0.925478				0.737647
0.946122		0.961397	0.788211	0.888799				0.946122
0.917059		0.699661	0.752705	0.872993				0.917059
0.910477		0.764669	0.74362	0.959514				0.910477
0.80938		0.789607	0.953121	0.959709				0.80938
0.92704		0.747223	0.705393	0.85446				0.92704
0.969178		0.814931	0.913716	0.929056				0.969178
0.912742		0.672227	0.813839	0.91857				0.912742
0.969073		0.722454	0.851522	0.75673				0.969073
0.954533		0.749503	0.692447	0.904314				0.954533
0.85852		0.910945	0.567705	0.817334				0.85852
0.933593		0.784754	0.779461	0.717501				0.933593
0.875719		0.860273	0.824817	0.94265				0.875719
0.959464		0.770156	0.770339	0.899996				0.959464
0.960309		0.773126	0.816768	0.912682				0.960309
0.844064		0.81292	0.866725	0.926709				0.844064
0.740522		0.762583	0.8485	0.939268				0.740522
0.891282		0.790433	0.919522	0.863683				0.891282
0.658831		0.844882	0.795752	0.810902				0.658831
0.862583		0.772058	0.708029	0.918906				0.862583
0.959166		0.777405	0.81016	0.850603				0.959166
0.902742		0.826844	0.787266	0.775374				0.902742
0.941953		0.817259	0.672701	0.903466				0.941953
0.965815		0.804093	0.677307	0.805286				0.965815
0.938888		0.806981	0.763741	0.835432				0.938888
0.924239		0.892216	0.821822	0.832888				0.924239
0.88554		0.827814	0.75554	0.921863				0.88554
0.497221		0.733235	0.697021	0.827604				0.497221
0.891716		0.841338	0.708084	0.918137				0.891716
0.927249		0.855435	0.921188	0.950846				0.927249
0.763944		0.802644	0.763382	0.919511				0.763944
0.948208		0.785083	0.744761	0.850374				0.948208
0.879781		0.824406	0.885623	0.874357				0.879781
0.859735		0.696968	0.945752	0.961761				0.859735
0.696678		0.786458	0.780325	0.851387				0.696678
0.809615		0.697809	0.856287	0.962094				0.809615
0.898954		0.843649	0.634094	0.83953				0.898954
0.902459		0.738403	0.844773	0.939795				0.902459
0.878779		0.728203	0.905711	0.886599				0.878779
0.909657		0.811983	0.954481	0.812489				0.909657
0.951242		0.697583	0.773525	0.890205				0.951242
0.811346		0.735605	0.744932	0.893922				0.811346
0.837398		0.867803	0.841513	0.713223				0.837398
0.794772		0.830357	0.80542	0.862135				0.794772
0.962965		0.822158	0.703935	0.934972				0.962965
0.906251		0.663066	0.785181	0.837358				0.906251
0.870071		0.818207	0.850468	0.89041				0.870071
0.897725		0.717016	0.805989	0.896809				0.897725
0.89116		0.771279	0.697452	0.883322				0.89116
0.915701		0.876135	0.916111	0.748554				0.915701
0.837236		0.808166	0.802136	0.701182				0.837236
0.756136		0.846074	0.779614	0.956995				0.756136
0.955375		0.834444	0.792759	0.954229				0.955375
0.758567		0.792512	0.773787	0.903096				0.758567
0.913358		0.732017	0.854192	0.882958				0.913358
0.906672		0.764696	0.809317	0.908228				0.906672
0.935933		0.832449	0.748495	0.904632				0.935933
0.953876		0.788608	0.795034	0.802239				0.953876
0.90673		0.756807	0.767895	0.912923				0.90673
0.885352		0.849864	0.793074	0.840022				0.885352
0.953793		0.803188	0.832217	0.823888				0.953793
0.909196		0.787361	0.853141	0.973511				0.909196
0.695815		0.758637	0.844814	0.858329				0.695815
0.892535		0.793855	0.923033	0.889402				0.892535
0.853146		0.858674	0.851171	0.662732				0.853146
0.967116		0.842372	0.68434	0.868245				0.967116
0.919699		0.785194	0.733849	0.861305				0.919699
0.875262		0.736556	0.61883	0.896151				0.875262
0.97448		0.769015	0.766544	0.921473				0.97448
0.911299		0.858792	0.74867	0.938318				0.911299
0.810769		0.776008	0.787219	0.864902				0.810769
0.962792		0.82234	0.877618	0.932654				0.962792
0.932222		0.840861	0.708371	0.905224				0.932222
0.864522		0.784289	0.841711	0.711385				0.864522
0.887117		0.813926	0.767795	0.880008				0.887117
0.766558		0.888584	0.776491	0.95188				0.766558
0.944782		0.865275	0.709775	0.939087				0.944782
0.885899		0.798378	0.755545	0.693323				0.885899
0.897393		0.746799	0.804796	0.855699				0.897393
0.975895		0.683544	0.65333	0.844267				0.975895
0.891113		0.759465	0.793725	0.941281				0.891113
0.785245		0.685951	0.694382	0.81848				0.785245
0.903416		0.734459	0.687685	0.661611				0.903416
0.93388		0.755514	0.713203	0.882761				0.93388
0.978417		0.846569	0.688008	0.785423				0.978417
0.873493		0.731771	0.839236	0.837516				0.873493
0.951566		0.851061	0.903008	0.891933				0.951566
0.963815		0.861188	0.817617	0.924564				0.963815
0.851345		0.830495	0.792131	0.906236				0.851345
0.938042		0.777916	0.78634	0.63174				0.938042
0.907064		0.84777	0.727084	0.889628				0.907064
0.884842		0.781791	0.778065	0.857295				0.884842
0.874091		0.835479	0.850702	0.93276				0.874091
0.961126		0.857004	0.886694	0.938702				0.961126
0.928009		0.700735	0.871087	0.95217				0.928009
0.901873		0.837075	0.697048	0.844066				0.901873
0.953346		0.806362	0.7191	0.788899				0.953346
0.977042		0.738103	0.754852	0.82907				0.977042
0.893486		0.773675	0.736492	0.89535				0.893486
0.868839		0.756911	0.635583	0.937296				0.868839
0.882519		0.720803	0.802503	0.826093				0.882519
0.949899		0.840337	0.779168	0.772218				0.949899
0.97939		0.871466	0.786097	0.867195				0.97939
0.94693		0.833811	0.754172	0.844603				0.94693
0.953309		0.725532	0.629619	0.89339				0.953309
0.969015		0.801885	0.646223	0.955449				0.969015
0.958163		0.811617	0.792381	0.861442				0.958163
0.852878		0.785651	0.72455	0.82576				0.852878
0.957044		0.740621	0.781076	0.899677				0.957044
0.964491		0.844009	0.871164	0.888904				0.964491
0.970496		0.760339	0.772324	0.747652				0.970496
0.943952		0.753721	0.74851	0.945879				0.943952
0.919402		0.738278	0.634792	0.960421				0.919402
0.897162		0.743306	0.679921	0.85593				0.897162
0.913296		0.663633	0.851205	0.94405				0.913296
0.839318		0.74792	0.985994	0.893381				0.839318
0.827645		0.690191	0.713363	0.883179				0.827645
0.967329		0.80874	0.84417	0.942286				0.967329
0.912561		0.920865	0.874058	0.904081				0.912561
0.892831		0.872837	0.923639	0.883148				0.892831
0.842443		0.873533	0.894908	0.657324				0.842443
0.968295		0.703738	0.735204	0.877793				0.968295
0.955472		0.672836	0.668784	0.796746				0.955472
0.960822		0.89598	0.706445	0.711692				0.960822
0.899066		0.81568	0.789005	0.832238				0.899066
0.978429		0.843046	0.639588	0.914622				0.978429
0.887784		0.813315	0.819579	0.911452				0.887784
0.977145		0.775651	0.974961	0.760551				0.977145
0.919153		0.782681	0.907022	0.945393				0.919153
0.910517		0.846596	0.816478	0.859476				0.910517
0.965961		0.880097	0.651631	0.800515				0.965961
0.975209		0.767492	0.684473	0.825876				0.975209
0.962225		0.734189	0.874207	0.895848				0.962225
0.978279		0.769812	0.762511	0.887631				0.978279
0.769452		0.690493	0.827527	0.818981				0.769452
0.862135		0.879396	0.699555	0.928195				0.862135
0.888166		0.663244	0.739726	0.817097				0.888166
0.895239		0.714775	0.808951	0.878117				0.895239
0.952019		0.679559	0.657433	0.756907				0.952019
0.877891		0.750661	0.872435	0.908177				0.877891
0.821247		0.843195	0.726309	0.836325				0.821247
0.941697		0.688052	0.66553	0.933167				0.941697
0.880005		0.827485	0.756994	0.862542				0.880005
0.969988		0.808651	0.695375	0.934439				0.969988
0.952388		0.79006	0.892839	0.865487				0.952388
0.945616		0.856448	0.74965	0.896955				0.945616
0.959382		0.82707	0.729703	0.852833				0.959382
0.876994		0.880864	0.786099	0.895301				0.876994
0.731201		0.85397	0.795801	0.896117				0.731201
0.929651		0.889911	0.779616	0.928037				0.929651
0.878724		0.760401	0.71119	0.882481				0.878724
0.917619		0.843582	0.73295	0.857882				0.917619
0.895743		0.699917	0.881582	0.907972				0.895743
0.949493		0.847201	0.763441	0.892021				0.949493
0.884964		0.801705	0.777663	0.913299				0.884964
0.925735		0.74747	0.88601	0.75912				0.925735
0.964418		0.769748	0.722676	0.944959				0.964418
0.934177		0.814622	0.633149	0.867682				0.934177
0.925448		0.86328	0.764267	0.918024				0.925448
0.901004		0.779327	0.678239	0.892891				0.901004
0.939707		0.894332	0.839619	0.891124				0.939707
0.861814		0.755903	0.919464	0.807333				0.861814
0.909419		0.670439	0.789775	0.80956				0.909419
0.949037		0.759508	0.864408	0.918522				0.949037
0.965878		0.652605	0.747995	0.68018				0.965878
0.920475		0.718054	0.774643	0.87664				0.920475
0.897085		0.707263	0.826983	0.674881				0.897085
0.961334		0.895925	0.956222	0.818288				0.961334
0.939391		0.822657	0.884172	0.935684				0.939391
0.752914		0.904579	0.846803	0.896948				0.752914
0.967378		0.741561	0.85743	0.866143				0.967378
0.970715		0.791595	0.849111	0.874568				0.970715
0.923904		0.851983	0.698021	0.805072				0.923904
0.860579		0.684413	0.865158	0.707351				0.860579
0.928028		0.803459	0.672413	0.96563				0.928028
0.970552		0.855724	0.672691	0.865873				0.970552
0.872646		0.762791	0.768066	0.839174				0.872646
0.934022		0.965743	0.842128	0.953703				0.934022
0.880129		0.639464	0.78021	0.943993				0.880129
0.964833		0.853874	0.805909	0.74852				0.964833
0.939115		0.855558	0.864711	0.946702				0.939115
0.936134		0.671449	0.851748	0.896219				0.936134
0.932467		0.87309	0.683501	0.921686				0.932467
0.940479		0.871659	0.824146	0.928537				0.940479
0.914679		0.9659	0.716142	0.877503				0.914679
0.861891		0.798209	0.709751	0.895961				0.861891
0.865016		0.702392	0.860844	0.937932				0.865016
0.962746		0.740829	0.918099	0.897851				0.962746
0.911617		0.962524	0.937643	0.928653				0.911617
0.839077		0.94743	0.970111	0.896534				0.839077
0.855335		0.710366	0.907505	0.898035				0.855335
0.840916		0.745972	0.82796	0.823516				0.840916
0.836785		0.862447	0.812943	0.889879				0.836785
0.845327		0.914281	0.96029	0.874552				0.845327
0.895545		0.757271	0.797919	0.750068				0.895545
0.93807		0.755383	0.795315	0.918671				0.93807
0.917826		0.815635	0.732734	0.97563				0.917826
0.864033		0.787042	0.900998	0.896312				0.864033
0.911567		0.784665	0.720675	0.909774				0.911567
0.937063		0.779245	0.884901	0.875949				0.937063
0.971143		0.80235	0.828582	0.775406				0.971143
0.899857		0.801157	0.940951	0.940266				0.899857
0.967342		0.814128	0.806145	0.960016				0.967342
[truncated: 17,834 more rows]
